# Supplementary material
Source: PubMed Central journal article supplement (PMC2935330)
Supplement: NIHMS212001-supplement-SupplementaryData.pdf [file NIHMS212001-supplement-SupplementaryData.pdf]

**Supplementary file 1**

| RBPs          | Domain |
|---------------|--------|
| A2BP1         | RRM    |
| ACIN1         | RRM    |
| BOLL          | RRM    |
| BRUNOL4       | RRM    |
| BRUNOL5       | RRM    |
| BRUNOL6       | RRM    |
| CCBL2         | RRM    |
| RCAN3         | RRM    |
| CIRBP         | RRM    |
| CNOT4         | RRM    |
| COVA1         | RRM    |
| CPEB1         | RRM    |
| CPEB2         | RRM    |
| CPEB3         | RRM    |
| CPEB4         | RRM    |
| CPSF6         | RRM    |
| FLJ12529      | RRM    |
| CSTF2         | RRM    |
| CSTF2T        | RRM    |
| CUGBP1        | RRM    |
| CUGBP2        | RRM    |
| D10S102       | RRM    |
| DAZ2          | RRM    |
| DAZ3          | RRM    |
| DAZ4          | RRM    |
| DAZL          | RRM    |
| DAZAP1        | RRM    |
| DNAJC17       | RRM    |
| DKFZp434J0315 | RRM    |
| DKFZp686F0223 | RRM    |
| DND1          | RRM    |
| DRB1          | RRM    |
| ELAV1         | RRM    |
| ELAVL2        | RRM    |
| ELAVL3        | RRM    |
| ELAVL4        | RRM    |
| EWS           | RRM    |

©2009 Landes Bioscience.  
Do not distribute.

**Supplementary file 1**

| RBM44 | RRM |  
| FUS | RRM |  
| G3BP1 | RRM |  
| G3BP2 | RRM |  
| GRSF1 | RRM |  
| HNRPH1 | RRM |  
| HNRPH2 | RRM |  
| HNRPH3 | RRM |  
| HNRPLL | RRM |  
| HNRPA0 | RRM |  
| HNRPA1 | RRM |  
| HNRPCL1 | RRM |  
| HNRPC | RRM |  
| HNRPDL | RRM |  
| HNRPD | RRM |  
| HNRPF | RRM |  
| HNRPG | RRM |  
| HNRPGT | RRM |  
| HNRPL | RRM |  
| HNRPM | RRM |  
| SYNCRIP | RRM |  
| HNRPR | RRM |  
| HTF9C | RRM |  
| HTATSF1 | RRM |  
| EIF3S4 | RRM |  
| EIF3S9 | RRM |  
| EIF4B | RRM |  
| EIF4H | RRM |  
| LARP4 | RRM |  
| LARP5 | RRM |  
| LARP7 | RRM |  
| LA | RRM |  
| LKAP | RRM |  
| LOC138046 | RRM |  
| MATR3 | RRM |  
| MGC10433 | RRM |  
| MINT | RRM |  
| MKI67IP | RRM |  
| MSI1 | RRM |  
| MSI2H | RRM |

©2009 Landes Bioscience.  
Do not distribute.

**Supplementary file 1**

| MSSP-1 | RRM |  
| MTHFSD | RRM |  
| MYEF2 | RRM |  
| NCBP2 | RRM |  
| NOL8 | RRM |  
| NONO | RRM |  
| NCL | RRM |  
| PABP1 | RRM |  
| PABP2 | RRM |  
| PABP3 | RRM |  
| PABP4 | RRM |  
| PABP5 | RRM |  
| PABPCP2 | RRM |  
| C20orf119 | RRM |  
| POLDIP3 | RRM |  
| SF3B14 | RRM |  
| PPIE | RRM |  
| PPIL4 | RRM |  
| PPRC1 | RRM |  
| PPARGC1A | RRM |  
| PPARGC1B | RRM |  
| PSPC1 | RRM |  
| PTBP2 | RRM |  
| Q8TC92 | RRM |  
| RALY | RRM |  
| RAVER1 | RRM |  
| RAVER2 | RRM |  
| RBM12B | RRM |  
| RBM15B | RRM |  
| RBM35A | RRM |  
| RBM35B | RRM |  
| RBM10 | RRM |  
| RBM11 | RRM |  
| RBM12 | RRM |  
| RBM14 | RRM |  
| RBM15 | RRM |  
| RBM16 | RRM |  
| RBM18 | RRM |  
| RBM19 | RRM |  
| RBM22 | RRM |

©2009 Landes Bioscience.  
Do not distribute.

**Supplementary file 1**

|  |               |  |     |  |
|--|---------------|--|-----|--|
|  | RBM23         |  | RRM |  |
|  | RBM24         |  | RRM |  |
|  | RBM25         |  | RRM |  |
|  | RBM26         |  | RRM |  |
|  | RBM27         |  | RRM |  |
|  | RBM28         |  | RRM |  |
|  | RBM33         |  | RRM |  |
|  | RBM34         |  | RRM |  |
|  | RBM38         |  | RRM |  |
|  | RBM39         |  | RRM |  |
|  | RBM3          |  | RRM |  |
|  | RBM41         |  | RRM |  |
|  | RBM43         |  | RRM |  |
|  | RBM4          |  | RRM |  |
|  | RBM5          |  | RRM |  |
|  | RBM6          |  | RRM |  |
|  | RBM7          |  | RRM |  |
|  | RBM8A         |  | RRM |  |
|  | RBM9          |  | RRM |  |
|  | RBMS1         |  | RRM |  |
|  | RBMS2         |  | RRM |  |
|  | RBMS3         |  | RRM |  |
|  | RBMX2         |  | RRM |  |
|  | RBMX1F        |  | RRM |  |
|  | RBMX2FP       |  | RRM |  |
|  | RBP56         |  | RRM |  |
|  | RPMS          |  | RRM |  |
|  | RPMS2         |  | RRM |  |
|  | RBMX1A1       |  | RRM |  |
|  | RDM1          |  | RRM |  |
|  | RNPC3         |  | RRM |  |
|  | RNPS1         |  | RRM |  |
|  | HNRPA0        |  | RRM |  |
|  | HNRPA2B1      |  | RRM |  |
|  | HNRPA3        |  | RRM |  |
|  | HNRPAB        |  | RRM |  |
|  | ROD1          |  | RRM |  |
|  | RP11-493K23.3 |  | RRM |  |
|  | RP11-78J21.1  |  | RRM |  |
|  | SNRP70        |  | RRM |  |

©2009 Landes Bioscience.  
Do not distribute.

**Supplementary file 1**

| SNRPB2 | RRM |  
| SAFB1 | RRM |  
| SAFB2 | RRM |  
| SART3 | RRM |  
| SET1A | RRM |  
| SF3B4 | RRM |  
| SFPQ | RRM |  
| SFRS11 | RRM |  
| SFRS12 | RRM |  
| SFRS15 | RRM |  
| SFRS1 | RRM |  
| SFRPS2B | RRM |  
| SFRPS2 | RRM |  
| SFRPS3 | RRM |  
| SFRS4 | RRM |  
| SFRPS5 | RRM |  
| SFRS6 | RRM |  
| SFRS7 | RRM |  
| SFRPS9 | RRM |  
| SIAHBP1 | RRM |  
| SLIRP | RRM |  
| SLTM | RRM |  
| SNRPA | RRM |  
| SPF45 | RRM |  
| SR140 | RRM |  
| SRrp35 | RRM |  
| SYNJ1 | RRM |  
| SYNJ2 | RRM |  
| TARDBP | RRM |  
| THOC4 | RRM |  
| TIA1 | RRM |  
| TIAR | RRM |  
| TNRC6A | RRM |  
| TNRC6C | RRM |  
| TNRC4 | RRM |  
| TRA2A | RRM |  
| TRA2B | RRM |  
| TRSPAP1 | RRM |  
| TUT1 | RRM |  
| U1SNRNPBP | RRM |

©2009 Landes Bioscience.  
Do not distribute.

**Supplementary file 1**

| U2AF1L4 | RRM |  
| U2AF1 | RRM |  
| U2AF2 | RRM |  
| ZRSR1 | RRM |  
| ZRSR2 | RRM |  
| UHMK1 | RRM |  
| ZCRB1 | RRM |  
| CTA-126B4.3 | RRM |  
| ZNF638 | RRM |

+-----+-----+

| AKAP1 | KH |  
| ANKHD1 | KH |  
| ANKRD17 | KH |  
| ASCC1 | KH |  
| DDX43 | KH |  
| DDX53 | KH |  
| ERAL1 | KH |  
| FMR1 | KH |  
| FUBP1 | KH |  
| FUBP2 | KH |  
| FUBP3 | KH |  
| FXR1 | KH |  
| FXR2 | KH |  
| HNRPK | KH |  
| KHDRBS3 | KH |  
| KHDRBS2 | KH |  
| KRR1 | KH |  
| NOVA1 | KH |  
| NOVA2 | KH |  
| PCBP1 | KH |  
| PCBP2 | KH |  
| PCBP3 | KH |  
| PCBP4 | KH |  
| PNO1 | KH |  
| PNPT1 | KH |  
| QKI | KH |  
| RKHD1 | KH |  
| RKHD3 | KH |  
| RPS3 | KH |  
| SAM68 | KH |

©2009 Landes Bioscience.  
Do not distribute.

**Supplementary file 1**

```
| SF1 | KH |
| TDRKH | KH |
| HDLBP | KH |
+-----+
| CDKN2AIP | dsrm |
| DGCR8 | dsrm |
| DHX30 | dsrm |
| DHX9 | dsrm |
| DICER | dsrm |
| DSRAD | dsrm |
| DUS2L | dsrm |
| E2AK2 | dsrm |
| EXOS9 | dsrm |
| ILF3 | dsrm |
| ADAD2 | dsrm |
| SLC4A1AP | dsrm |
| NKRF | dsrm |
| PRKRA | dsrm |
| RED1 | dsrm |
| RED2 | dsrm |
| MRPL44 | dsrm |
| RNASEN | dsrm |
| SON | dsrm |
| STAU1 | dsrm |
| STAU2 | dsrm |
| STRBP | dsrm |
| Tenr | dsrm |
| TRBP2 | dsrm |
+-----+
| ACF | dsrm RRM |
| MGC27016 | dsrm RRM |
| PTBP1 | dsrm RRM |
+-----+
| IGF2BP2 | KH RRM |
| IGF2BP3 | KH RRM |
| IGF2BP1 | KH RRM |
+-----+
| APOBEC3F | other |
| APOBEC1 | other |
| APOBEC2 | other |
```

©2009 Landes Bioscience.  
Do not distribute.

**Supplementary file 1**

| ADAT1 | other |  
| CPSF5 | other |  
| CSDC2 | other |  
| CSTF1 | other |  
| CSTF3 | other |  
| DDX19B | other |  
| DDX17 | other |  
| DKC1 | other |  
| DUSP11 | other |  
| EPRS | other |  
| EXOSC1 | other |  
| EXOSC7 | other |  
| FBL | other |  
| HNRPUL1 | other |  
| HNRPU | other |  
| IF2B | other |  
| IREB1 | other |  
| IREB2 | other |  
| JOSD2 | other |  
| LRPPRC | other |  
| LSM5 | other |  
| MOV10L1 | other |  
| RNMT | other |  
| NCBP1 | other |  
| NHP2L1 | other |  
| NOL3 | other |  
| NOL4 | other |  
| NOP56 | other |  
| NPM | other |  
| NPM1 | other |  
| NUFIP1 | other |  
| HRB | other |  
| NXF1 | other |  
| NXF2 | other |  
| NXF5 | other |  
| PAIP1 | other |  
| PAPOLA | other |  
| PAPOLB | other |  
| PAPOLG | other |  
| PPP1R8 | other |

©2009 Landes Bioscience.  
Do not distribute.



**Supplementary file 1**

| PSMA1 | other |  
| PSMA6 | other |  
| RAD51AP1 | other |  
| RAE1 | other |  
| RENT1 | other |  
| RIB1 | other |  
| RPL12 | other |  
| RPL13 | other |  
| RL14 | other |  
| RPL18 | other |  
| RPL19 | other |  
| RPL22 | other |  
| RPL27A | other |  
| RPL28 | other |  
| RPL29 | other |  
| RPL3 | other |  
| RPL34 | other |  
| RPL35A | other |  
| RPL3L | other |  
| RPL4 | other |  
| RPL5 | other |  
| RPL6 | other |  
| RPLP0 | other |  
| RPLP1 | other |  
| RPLP2 | other |  
| MRPL3 | other |  
| MRPL12 | other |  
| MRPL23 | other |  
| RNASEL | other |  
| RNASE1 | other |  
| RNH1 | other |  
| RO60 | other |  
| RPL18A | other |  
| RPL21 | other |  
| RPL7 | other |  
| RPL9 | other |  
| RPP14 | other |  
| RPP29 | other |  
| RPS13 | other |  
| RPS17 | other |

©2009 Landes Bioscience.  
Do not distribute.

**Supplementary file 1**

| RPS27 | other |  
| RPS10 | other |  
| RPS12 | other |  
| RPS19 | other |  
| RPS2 | other |  
| RPS4Y1 | other |  
| RPS5 | other |  
| RPS9 | other |  
| MRPS15 | other |  
| RTCD1 | other |  
| SCAND1 | other |  
| SLBP | other |  
| SRP14 | other |  
| SRP68 | other |  
| SRP72 | other |  
| SRP9 | other |  
| SUPV3L1 | other |  
| SURF6 | other |  
| GARS | other |  
| HARS | other |  
| MARS | other |  
| SARS | other |  
| SYWC | other |  
| TACC1 | other |  
| TACC2 | other |  
| TARB1 | other |  
| TEP1 | other |  
| YBOX1 | other |  
| YBOX2 | other |  
| ZNF239 | other |  
| ZRANB2 | other |

+-----+-----+

©2009 Landes Bioscience.  
Do not distribute.

**List of RBPs with nuclear localization.**

```
+-----+
| RBPs |
+-----+
| APOBEC3F |
| ACF |
| ACIN1 |
| BRUNOL4 |
| CIRBP |
| CPSF5 |
| CPSF6 |
| CSDC2 |
| CSTF1 |
| CSTF2 |
| CSTF3 |
| CSTF2T |
| CUGBP1 |
| DAZ2 |
| DAZ3 |
| DAZ4 |
| DAZL |
| DAZAP1 |
| DDX19B |
| DDX17 |
| DDX53 |
| DGCR8 |
| DHX9 |
| DKC1 |
| DRB1 |
| DSRAD |
| DUSP11 |
| EWS |
| EXOSC1 |
| EXOSC7 |
| EXOS9 |
| FBL |
| FMR1 |
| FUBP1 |
| FUBP2 |
| FUBP3 |
| FUS |
| FXR1 |
| FXR2 |
| G3BP1 |
| HNRPH1 |
| HNRPH2 |
| HNRPH3 |
| HNRPUL1 |
```

©2009 Landes Bioscience.  
Do not distribute.

*Supplementary file 2*

HNRPLL |  
HNRPA0 |  
HNRPA1 |  
HNRPC |  
HNRPCL1 |  
HNRPD |  
HNRPDL |  
HNRPF |  
HNRPG |  
HNRPK |  
HNRPL |  
HNRPM |  
SYNCRIP |  
HNRPR |  
HNRPU |  
HTATSF1 |  
ILF3 |  
KHDRBS3 |  
KRR1 |  
LA |  
LARP7 |  
LRPPRC |  
LSM5 |  
MATR3 |  
RNMT |  
MINT |  
MKI67IP |  
MSI1 |  
MSSP-1 |  
MYEF2 |  
SLC4A1AP |  
NCBP1 |  
NCBP2 |  
NHP2L1 |  
NKRF |  
NOL3 |  
NOL4 |  
NONO |  
NOP56 |  
NOVA1 |  
NOVA2 |  
NPM |  
NPM1 |  
NCL |  
NUFIP1 |  
HRB |  
NXF1 |  
NXF2 |

©2009 Landes Bioscience.  
Do not distribute.

*Supplementary file 2*

NXF5 |  
PABP1 |  
PABP2 |  
PAPOLA |  
PAPOLB |  
PAPOLG |  
PCBP1 |  
PCBP2 |  
PCBP3 |  
PCBP4 |  
POLDIP3 |  
SF3B14 |  
PPP1R8 |  
PPIE |  
PPARGC1A |  
PPARGC1B |  
PSMA1 |  
PTBP1 |  
PTBP2 |  
RAD51AP1 |  
RAE1 |  
RALY |  
RAVER1 |  
RAVER2 |  
RBM15B |  
RBM10 |  
RBM12 |  
RBM14 |  
RBM15 |  
RBM19 |  
RBM22 |  
RBM23 |  
RBM26 |  
RBM27 |  
RBM28 |  
RBM34 |  
RBM39 |  
RBM4 |  
RBM5 |  
RBM6 |  
RBM8A |  
RBM9 |  
RBMS1 |  
RBMS2 |  
RBP56 |  
RBM1A1 |  
RED1 |  
RED2 |

©2009 Landes Bioscience.  
Do not distribute.

*Supplementary file 2*

RPL3 |  
RPL5 |  
RNASEN |  
RNPS1 |  
HNRPA0 |  
HNRPA2B1 |  
HNRPA3 |  
HNRPAB |  
ROD1 |  
RPP14 |  
RPP29 |  
RTCD1 |  
SNRP70 |  
SNRPB2 |  
SAFB1 |  
SAFB2 |  
SAM68 |  
SCAND1 |  
SET1A |  
SF1 |  
SF3B4 |  
SFPQ |  
SFRS11 |  
SFRS12 |  
SFRS15 |  
SFRS1 |  
SFRPS2 |  
SFRPS3 |  
SFRS4 |  
SFRPS5 |  
SFRS6 |  
SFRS7 |  
SFRPS9 |  
SLBP |  
SNRPA |  
SON |  
SPF45 |  
SRP68 |  
SRP9 |  
SRrp35 |  
STAU2 |  
SURF6 |  
TACC1 |  
TACC2 |  
TARDBP |  
TARB1 |  
TEP1 |  
THOC4 |

©2009 Landes Bioscience.  
Do not distribute.

*Supplementary file 2*

|         |
|---------|
| TNRC4   |
| TRA2A   |
| TRA2B   |
| TRBP2   |
| TRSPAP1 |
| U2AF1   |
| U2AF1L4 |
| U2AF2   |
| ZRSR2   |
| UHMK1   |
| HDLBP   |
| YBOX1   |
| YBOX2   |
| ZNF239  |
| ZNF638  |
| ZRANB2  |
| ZRSR1   |

+-----+

©2009 Landes Bioscience.  
Do not distribute.

*Supplementary file 3*

List of libraries used in the RBP expression analysis . Symbol ' #' identify the tissue name; first column is the library id; second column is the library name; third column is the total of tags (information obtained from SAGEGenie).

===== SAGE: Libraries from normal tissue =====

**#Brain\_astrocyte**

9 SAGE\_Brain\_astrocyte\_normal\_CL\_NHA5 51481

**#Brain\_cerebellum**

34 SAGE\_Brain\_normal\_cerebellum\_B\_1 50385

**#Brain\_cortex**

8 SAGE\_Brain\_normal\_cortex\_B\_BB542 94233

10 SAGE\_Brain\_normal\_cortex\_B\_pool6 62451

133 SAGE\_Brain\_normal\_peds\_cortex\_B\_H1571 77554

**#Breast**

47 SAGE\_Breast\_normal\_epithelium\_AP\_Br\_N 50512

420 SAGE\_Breast\_normal\_myoepithelium\_AP\_IDC7 69006

131 SAGE\_Breast\_normal\_myoepithelium\_AP\_myoepithelial1 57222

182 SAGE\_Breast\_normal\_organoid\_B 58181

**#Colon**

11 SAGE\_Colon\_normal\_B\_NC1 49610

**#Eye**

1363 SAGE\_Eye\_lens\_B\_UIH10 85898

**#Heart**

136 SAGE\_Heart\_normal\_B\_1 83063

**#Liver**

135 SAGE\_Liver\_normal\_B\_1 66308

**#Lung**

99 SAGE\_Lung\_normal\_B\_1 88708

**#Muscle**

141 SAGE\_Muscle\_normal\_B\_old 53889

142 SAGE\_Muscle\_normal\_B\_young 53947

**#Placenta**

160 SAGE\_Placenta\_first\_trimester\_normal\_B\_1 89265

364 SAGE\_Placenta\_hydatidiform\_mole\_B\_1 101677

161 SAGE\_Placenta\_normal\_B\_1 118083

**#Prostate**

59 SAGE\_Prostate\_normal\_B\_2 64058

169 SAGE\_Prostate\_normal\_epithelium\_CS\_confluent 71897

203 SAGE\_Prostate\_normal\_epithelium\_CS\_senescent 71717

72 SAGE\_Prostate\_normal\_MD\_PR317 59277

**#Retina**

164 SAGE\_Retina\_macula\_normal\_B\_HMAC2 102417

162 SAGE\_Retina\_Peripheral\_normal\_B\_1 59661

163 SAGE\_Retina\_Peripheral\_normal\_B\_2 105312

165 SAGE\_Retina\_Pigment\_epithelium\_normal\_B\_1 53666

**#Spinal\_cord**



*Supplementary file 3*

167 SAGE\_Spinal\_cord\_normal\_B\_1 54785

**#Stomach**

1624 SAGE\_Stomach\_normal\_MD\_14S 73353

**#Thyroid**

389 SAGE\_Thyroid\_normal\_B\_001 115938

**#Vascular\_endothelium**

180 SAGE\_Vascular\_endothelium\_normal\_breast\_associated\_AP\_1 57023

429 SAGE\_Vascular\_endothelium\_normal\_liver\_associated\_AP\_NLEC1 77759

29 SAGE\_Vascular\_normal\_CS\_control 51642

30 SAGE\_Vascular\_normal\_CS\_VEGF + 57316

**#White\_Blood\_Cells**

1574 SAGE\_White\_Blood\_Cells\_monocytes\_normal\_AP\_A2 98826

1571 SAGE\_White\_Blood\_Cells\_monocytes\_normal\_AP\_C1 101722

1570 SAGE\_White\_Blood\_Cells\_monocytes\_normal\_AP\_P2 54447

1576 SAGE\_White\_Blood\_Cells\_monocyte\_cells\_normal\_AP\_A1 53825

1575 SAGE\_White\_Blood\_Cells\_monocyte\_cells\_normal\_AP\_P1 51653

1573 SAGE\_White\_Blood\_Cells\_monocyte\_normal\_AP\_A1 99961

1572 SAGE\_White\_Blood\_Cells\_monocyte\_normal\_AP\_P1 101225

**#Stem\_Cell**

1604 SAGE\_Embryonic\_stem\_cell\_BG01\_normal\_p20\_CL\_SHE19 201668

1332 SAGE\_Embryonic\_stem\_cell\_HSF6\_normal\_p50\_CL\_SHES9 224488

1386 SAGE\_Embryonic\_stem\_cell\_H13\_normal\_p22\_CL\_SHE15 221101

1391 SAGE\_Embryonic\_stem\_cell\_H1\_normal\_p31\_CL\_SHE17 276203

1384 SAGE\_Embryonic\_stem\_cell\_HES4\_normal\_p36\_CL\_SHE11 209232

1388 SAGE\_Embryonic\_stem\_cell\_H1\_normal\_p54\_CL\_SHE16 218214

1331 SAGE\_Embryonic\_stem\_cell\_HES3\_normal\_p16\_CL\_SHE10 205353

1334 SAGE\_Embryonic\_stem\_cell\_H14\_normal\_p22\_CL\_SHE14 212170

1333 SAGE\_Embryonic\_stem\_cell\_H7\_normal\_p33\_CL\_SHE13 272465

1003 SAGE\_Embryonic\_stem\_cell\_H9\_normal\_p38\_CL\_SHES2 401432

844 SAGE\_Embryonic\_stem\_cell\_H9\_normal\_p38\_CL\_SHES1 151735

===== SAGE: Libraries from tumor tissue =====

**#Brain\_astrocyte**

343 SAGE\_Brain\_astrocytoma\_grade\_III\_B\_343 100158

361 SAGE\_Brain\_astrocytoma\_grade\_III\_B\_407 108312

385 SAGE\_Brain\_astrocytoma\_grade\_III\_B\_439 107824

344 SAGE\_Brain\_astrocytoma\_grade\_III\_B\_584 103008

349 SAGE\_Brain\_astrocytoma\_grade\_III\_B\_828 99939

54 SAGE\_Brain\_astrocytoma\_grade\_III\_B\_H1020 51573

350 SAGE\_Brain\_astrocytoma\_grade\_III\_B\_H1055 109886

563 SAGE\_Brain\_astrocytoma\_grade\_III\_B\_H272 96059

283 SAGE\_Brain\_astrocytoma\_grade\_III\_B\_H970 106982

384 SAGE\_Brain\_astrocytoma\_grade\_III\_B\_R140 118733

351 SAGE\_Brain\_astrocytoma\_grade\_III\_B\_R927 107344

345 SAGE\_Brain\_astrocytoma\_grade\_II\_B\_H127 114489

144 SAGE\_Brain\_astrocytoma\_grade\_II\_B\_H359 105764

145 SAGE\_Brain\_astrocytoma\_grade\_II\_B\_H388 106285

*Supplementary file 3*

346 SAGE\_Brain\_astrocytoma\_grade\_II\_B\_H501 128309  
347 SAGE\_Brain\_astrocytoma\_grade\_II\_B\_H516 108116  
564 SAGE\_Brain\_astrocytoma\_grade\_II\_B\_H518 116022  
348 SAGE\_Brain\_astrocytoma\_grade\_II\_B\_H530 102439  
146 SAGE\_Brain\_astrocytoma\_grade\_II\_B\_H563 88568  
50 SAGE\_Brain\_astrocytoma\_grade\_I\_B\_H1043 75922

**#Brain\_cortex**

137 SAGE\_Brain\_ependymoma\_B\_1150 62373  
139 SAGE\_Brain\_ependymoma\_B\_1394 56314  
267 SAGE\_Brain\_ependymoma\_B\_H580 68614  
147 SAGE\_Brain\_ependymoma\_B\_R1023 122690  
148 SAGE\_Brain\_ependymoma\_B\_R353 73822  
149 SAGE\_Brain\_ependymoma\_B\_R455 51825  
406 SAGE\_Brain\_ependymoma\_B\_R510 84073  
388 SAGE\_Brain\_ependymoma\_B\_R512 75379  
150 SAGE\_Brain\_ependymoma\_B\_R582 52189  
151 SAGE\_Brain\_ependymoma\_B\_R628 120431  
86 SAGE\_Brain\_glioblastoma\_B\_GBM1062 59762  
4 SAGE\_Brain\_glioblastoma\_B\_H1110 68986  
354 SAGE\_Brain\_glioblastoma\_B\_H1353 124805  
352 SAGE\_Brain\_glioblastoma\_B\_H1425C 88990  
356 SAGE\_Brain\_glioblastoma\_B\_H833 100600  
7 SAGE\_Brain\_glioblastoma\_B\_pooled 56428  
357 SAGE\_Brain\_glioblastoma\_B\_R20 101053  
358 SAGE\_Brain\_glioblastoma\_B\_R336 102322  
359 SAGE\_Brain\_glioblastoma\_B\_R70 99099  
1648 SAGE\_Brain\_glioblastoma\_CL\_28d 110624  
1650 SAGE\_Brain\_glioblastoma\_CL\_4d 115212  
3 SAGE\_Brain\_glioblastoma\_CL\_H392 55990  
68 SAGE\_Brain\_glioblastoma\_CL\_H54 + EGFRvIII 56982  
67 SAGE\_Brain\_glioblastoma\_CL\_H54 +LacZ 66908  
1649 SAGE\_Brain\_glioblastoma\_CL\_stem\_cells 108414  
41 SAGE\_Brain\_glioblastoma\_control\_CL\_H247 60428  
42 SAGE\_Brain\_glioblastoma\_hypoxia\_CL\_H247 71765

**#Brain\_cerebellum**

123 SAGE\_Brain\_medulloblastoma\_B\_96-04-P019 52645  
126 SAGE\_Brain\_medulloblastoma\_B\_97-05-P015 69971  
408 SAGE\_Brain\_medulloblastoma\_B\_97-05-P312 74295  
413 SAGE\_Brain\_medulloblastoma\_B\_98-05-P040 89258  
386 SAGE\_Brain\_medulloblastoma\_B\_98-09-P558 85984  
414 SAGE\_Brain\_medulloblastoma\_B\_C609 74612  
399 SAGE\_Brain\_medulloblastoma\_B\_DL5 83671  
400 SAGE\_Brain\_medulloblastoma\_B\_DL7 68392  
412 SAGE\_Brain\_medulloblastoma\_B\_H1322 59498  
401 SAGE\_Brain\_medulloblastoma\_B\_H1413 61853  
397 SAGE\_Brain\_medulloblastoma\_B\_H275 72318

*Supplementary file 3*

383 SAGE\_Brain\_medulloblastoma\_B\_H306 60454  
407 SAGE\_Brain\_medulloblastoma\_B\_H484 57469  
415 SAGE\_Brain\_medulloblastoma\_B\_H876 67404  
263 SAGE\_Brain\_medulloblastoma\_B\_H972 85376  
303 SAGE\_Brain\_medulloblastoma\_CL\_4-HCR 66599  
243 SAGE\_Brain\_medulloblastoma\_CL\_D283 66316

**#Breast**

156 SAGE\_Breast\_carcinoma\_associated\_myoepithelium\_AP\_DCIS6 81452  
158 SAGE\_Breast\_carcinoma\_associated\_myoepithelium\_AP\_DCIS7 51993  
416 SAGE\_Breast\_carcinoma\_associated\_myofibroblast\_AP\_IDC7 65091  
1169 SAGE\_Breast\_carcinoma\_associated\_myofibroblast\_AP\_T112603 63539  
1164 SAGE\_Breast\_carcinoma\_associated\_myofibroblast\_AP\_T392303 73967  
424 SAGE\_Breast\_carcinoma\_associated\_stroma\_B\_DCIS6 57049  
419 SAGE\_Breast\_carcinoma\_associated\_stroma\_B\_IDC7 68024  
82 SAGE\_Breast\_carcinoma\_B\_95-347 67070  
431 SAGE\_Breast\_carcinoma\_B\_BWHT18 50701  
171 SAGE\_Breast\_carcinoma\_B\_DCIS-4 60605  
173 SAGE\_Breast\_carcinoma\_B\_IDC-3 68891  
174 SAGE\_Breast\_carcinoma\_B\_IDC-4 64095  
175 SAGE\_Breast\_carcinoma\_B\_IDC-5 60451  
77 SAGE\_Breast\_carcinoma\_CL\_MCF7control\_0h 59877  
79 SAGE\_Breast\_carcinoma\_CL\_MCF7estradiol\_10H 59583  
78 SAGE\_Breast\_carcinoma\_CL\_MCF7estradiol\_3h 59583  
187 SAGE\_Breast\_carcinoma\_epithelium\_AP\_DCIS-3 57402  
153 SAGE\_Breast\_carcinoma\_epithelium\_AP\_DCIS6 72857  
157 SAGE\_Breast\_carcinoma\_epithelium\_AP\_DCIS7 89184  
418 SAGE\_Breast\_carcinoma\_epithelium\_AP\_IDC7 73410  
1163 SAGE\_Breast\_carcinoma\_epithelium\_AP\_T112603 65935  
1165 SAGE\_Breast\_carcinoma\_epithelium\_AP\_T392303 66520  
1166 SAGE\_Breast\_carcinoma\_MD\_LCIS 67834

**#Colon**

e13 SAGE\_Colon\_adenocarcinoma\_B\_Tu102 55700  
2 SAGE\_Colon\_adenocarcinoma\_CL\_Caco2 60682  
1 SAGE\_Colon\_adenocarcinoma\_CL\_HCT116 55641  
6 SAGE\_Colon\_adenocarcinoma\_CL\_RKO 51294  
5 SAGE\_Colon\_adenocarcinoma\_CL\_SW837 61148  
428 SAGE\_Colon\_carcinoma\_CL\_Hct116\_p53\_knockout\_Anoxia 79539  
426 SAGE\_Colon\_carcinoma\_CL\_Hct116\_p53\_knockout\_Normal\_Oxygen 79739  
425 SAGE\_Colon\_carcinoma\_CL\_Hct116\_wildtype\_p53\_Anoxia 79411  
427 SAGE\_Colon\_carcinoma\_CL\_Hct116\_wildtype\_p53\_Normal\_Oxygen 80826

**#Liver**

266 SAGE\_Liver\_cholangiocarcinoma\_B\_K1 60319  
504 SAGE\_Liver\_cholangiocarcinoma\_CL\_K3 54842  
503 SAGE\_Liver\_cholangiocarcinoma\_CL\_K4 52973

**#Lung**

587 SAGE\_Lung\_adenocarcinoma\_MD\_L10 86887

*Supplementary file 3*

1366 SAGE\_Lung\_tumor\_associated\_chronic\_inflammation\_B\_UIHM0 98962

**#Prostate**

73 SAGE\_Prostate\_adenocarcinoma\_MD\_PR317 64951

60 SAGE\_Prostate\_carcinoma\_B\_pool2 66034

57 SAGE\_Prostate\_carcinoma\_CL\_LNCaP 60250

58 SAGE\_Prostate\_carcinoma\_CL\_LNCaP\_no-DHT 62160

**#Stomach**

97 SAGE\_Stomach\_adenocarcinoma\_B\_G234 64925

1443 SAGE\_Stomach\_adenocarcinoma\_MD\_HG7 93714

1445 SAGE\_Stomach\_adenocarcinoma\_MD\_HS29 58831

186 SAGE\_Stomach\_carcinoma\_B\_G189 63075

170 SAGE\_Stomach\_carcinoma\_B\_xenograft\_X101 69749

244 SAGE\_Stomach\_carcinoma\_B\_xenograph\_X43 51620

**#Thyroid**

365 SAGE\_Thyroid\_follicular\_carcinoma\_B\_TT004 124664

**#Vascular\_endothelium**

159 SAGE\_Vascular\_endothelium\_breast\_carcinoma\_AP\_DCIS6 65314

185 SAGE\_Vascular\_endothelium\_hemangioma\_B\_146 75680

**#White\_Blood\_Cells**

155 SAGE\_White\_Blood\_Cells\_breast\_carcinoma\_associated\_AP\_DCIS6 66176

**List of libraries used in the RBP expression analysis.** Symbol '#' identify the tissue name; first column is our local library identification; second column is the library name; third column is the total of tags (information obtained from <http://mps.s.licr.org>).

=====**MPSS : Libraries from normal tissue**=====

**#Adrenal**

1 HuAG.basl 1365238

**#Bladder**

2 HuBl.basl 1335841

**#Bone\_marrow**

3 HuBM.basl 1445400

**#Kidney**

12 HuKi.basl 1461001

**#Pituitary\_gland**

15 HuPG.basl 1379052

**#Salivary\_gland**

21 HuSG.basl 1350021

**#Small\_intestine**

22 HuSI.basl 1336379

**#Testis**

25 HuTe.basl 1292053

**#Thymus**

26 HuTm.basl 1341049

**#Trachea**

27 HuTr.basl 1318303

**#Uterus**

*Supplementary file 3*

29 HuUt.basl 1335188

**#Monocytes**

49 HuMo.basl 1318365

**#Peripheral\_blood\_lymphocyte**

55 HuPB.ctrl 1367070

**#Skeletal\_muscle**

38 skeletal.muscle 1147429

©2009 Landes Bioscience.

Do not distribute.

## Supplementary file 4

### List of tags used for SAGE and MPSS analyses

```
+-----+-----+-----+
| RBPs | SAGE tags | MPSS tags |
+-----+-----+-----+
| A2BP1 | SAGE: CCGTAAGATC | MPSS: AGTTGGATATTAA |
| APOBEC3F | SAGE: CAGAGCTGTG | MPSS: ACAGACACCAGCA |
| APOBEC1 | SAGE: GATCAACAAA | MPSS: AACAAAATCGGCA |
| ACF | SAGE: AAGTAAAAAA | MPSS: ATAAATAATATGT
TCTGAAATTACTC |
| ACIN1 | SAGE: AAGTAAAGAA | MPSS: GCAGGGACACCAA |
| ADAT1 | SAGE: CAGAGAGCAC | MPSS: AGAAACCCACCGG |
| AKAP1 | SAGE: TCACCTGTAG | MPSS: TGGGAAC TTTTGTG |
| ANKHD1 | SAGE: CCACTGCTGC TATAATTGTT AAGACTATTT
CCACTTGCTG | MPSS: CCTCATGCCACTG ATATGACCTTAGT
CGGCCAAGCATCA CCTCATGCCACTT |
| ANKRD17 | SAGE: GAAAAATTAA AACAGTGTAC AACAGTGTGC |
MPSS: AACAGTTAATTTG CTGAAGTTTTAGA |
| ASCC1 | SAGE: TCGGTACCAC | MPSS: TTGGAAAGCACTA |
| BOLL | SAGE: AGAACAGTAG TTTTATCCAT | MPSS:
TCAAATACATTAA CAGCTTCAACGAA |
| BRUNOL4 | SAGE: AAGAAGAAGA | MPSS: GGCATGAAGAGGC |
| BRUNOL5 | SAGE: AAGTTTCAAC | MPSS: GGCATGAAGAGGC
ATGGGACCAAAT |
| BRUNOL6 | SAGE: TCAGATAGTA TGCTTAACCG | MPSS:
TGATAACATGTCA AATGGTGGTGAAA |
| CCBL2 | SAGE: GCAGATTTAT | MPSS: ACTTTTCACTTTT |
| RCAN3 | SAGE: TCATTGTGGT | MPSS: ATCATTGTGCATT |
| CDKN2AIP | SAGE: AATGTGGGT | MPSS: TAGTACTCCTTGA |
| CIRBP | SAGE: AAGTGGGTGC | MPSS: GAACGGACTGTGA |
| CNOT4 | SAGE: GGGGAAAGCA | MPSS: ACCATCGGGAGCA |
| COVA1 | SAGE: GAGAGTATTT TGAGTGGACC | MPSS:
TGTTTCAGAATTG |
| CPEB2 | SAGE: TTCAAATAAA CTTTTATGGA | MPSS:
CACTTCCGCTGGA ATATTTATTTTAC |
| CPEB4 | SAGE: GTGATTTTTG | MPSS: TTTGCAGTGTAAT |
| CPSF5 | SAGE: TGTTACTGCT TATTTAGAAA | MPSS:
ACTGTTCTTTTTT |
| CPSF6 | SAGE: GATAAAATGA | MPSS: TGAATAAAGCAAA |
| CSDC2 | SAGE: AGGAATAAAG | MPSS: CCTTGCCTTG TAG |
| CSTF2 | SAGE: TTGCCTCCTG | MPSS: ATGAGAAGGCTGC |
| CSTF3 | SAGE: TCAGGAGACG | MPSS: ATTACTGGTGGGG |
| CSTF2T | SAGE: CAGAAAATAA ATTATATTAT | MPSS:
ATTTTGAGATTCT AGATTGCCATGCT |
| CUGBP1 | SAGE: TCGATGTGGC | MPSS: AGGACCTGCTGCA |
| CUGBP2 | SAGE: AAACGTTTCT TCCCCACCCA | MPSS:
AAAGTTTTTTCTG CTAACCCAGAGG |
| DAZAP1 | SAGE: AGCAAGCCCC | MPSS: AGTTTGCCCCTCC |
```

**Supplementary file 4**

| DDX17 | SAGE: CAGATTAGTT | MPSS: CAGTCTGGAATAA |  
| DDX53 | SAGE: TTAAAGATAT | MPSS: AAGAAAACCTGGA  
AAGAGAACCTGGA |  
| DGCR8 | SAGE: CTTCAAGGCC CTTGTCCCTT | MPSS:  
CAGAGCTGTTGCC |  
| DHX30 | SAGE: GTGGAGCGGA | MPSS: GGGTGCTGGACC |  
| DHX9 | SAGE: CTATGTGTTA | MPSS: TCTTAAAAATACC |  
| DICER | SAGE: CTGCAGAAAT | MPSS: ACAATTACCTTTA |  
| DNAJC17 | SAGE: CGCCAGGCGG | MPSS: GCACGGATGCAGC |  
| DKC1 | SAGE: CTAGCAGAGC | MPSS: TCATGCTAGCAGA |  
| DKFZp434J0315 | SAGE: TATAAGTTTT | MPSS: TTAAAAGTGAAA  
|  
| DKFZp686F02235 | SAGE: TGCCTGTAAA CCCTTAGCAA GTATGTAGTT  
| MPSS: CTCATCCCCTGAC TCTCCTTAAGCCA |  
| DND1 | SAGE: GCATTCTGGT | MPSS: ATACCTTCCCCC |  
| DRB1 | SAGE: TATTTTTGAA | MPSS: GAAGTTTACCTTG |  
| DSRAD | SAGE: CCCCTCTGAG | MPSS: GCACATCCCCTGCG |  
| DUSP11 | SAGE: TTTACCAGAG GTGGTCATTT | MPSS:  
CAGGGTCACTCAG AGCAGAGACCATA |  
| DUS2L | SAGE: GACCAGGGGC | MPSS: TGAGTGACAGGGT |  
| E2AK2 | SAGE: TATGTGACAC | MPSS: TTAAGCCAAGTAA |  
| ELAV1 | SAGE: AAAAAGTTTT CACAGCGCC | MPSS:  
ATTGCGAAAAAAA TAAGCTCCAGGA |  
| ELAVL2 | SAGE: TTCAGTACAT | MPSS: TGAGTTGGATATA |  
| ELAVL3 | SAGE: CCAGAAAATA | MPSS: ACAGGCCCTGGCCG |  
| ELAVL4 | SAGE: TTAATCTTGC | MPSS: ATTTTAGTATGTT |  
| EPRS | SAGE: AACGAAAAAA | MPSS: TTGAACCTGGTGC |  
| ERAL1 | SAGE: AACACTGACT | MPSS: TCTCCCACCCCAT |  
| EWS | SAGE: GACCGAGGTG AGCAGAGGTG | MPSS: GTGGAGGCATGAG  
|  
| EXOSC7 | SAGE: TAAAATTTAA | MPSS: GCTAACACCCTCT |  
| EXOS9 | SAGE: AACAAACATC | MPSS: ATTTTGGAAACCAG |  
| FBL | SAGE: CCGTGCTCGT | MPSS: TTTGCTGATGTGG |  
| RBM44 | SAGE: CATTTTTTAT | MPSS: TAAAGAAATTGTC |  
| FMR1 | SAGE: ATGTTTTTAA | MPSS: TTCCTCTGCTAAA |  
| FUBP1 | SAGE: TGAAGCAACT ATTCCAGCTA GTCCTCCAGC | MPSS:  
TTTTGGCATACTT CAGCCAGTATAGA |  
| FUBP2 | SAGE: TTGAGCCAGC | MPSS: TAAATCTCTGCCA |  
| FUBP3 | SAGE: GGGTTTTTAA | MPSS: ATTTTGTTCAT |  
| FUS | SAGE: GGGGGTAACT | MPSS: AGGAAGGTAGAGA  
ACCCAAGGGTTTT |  
| FXR1 | SAGE: TTAGTCTTCA | MPSS: TTCCATTTGCTGA  
TTCCATTAAAAAA |  
| FXR2 | SAGE: GCCCTCACAG | MPSS: CAGACAGTAATCC |  
| G3BP2 | SAGE: GTGATTGTTT ATGGTGCCTT | MPSS:  
ATTTCTTTGATGT |  
| GRSF1 | SAGE: TCAGAACAGT | MPSS: TGATTTAAAAATA |

**Supplementary file 4**

| HNRPH3 | SAGE: TCATAGTCAA AGTGGAGGTG | MPSS:  
AAAATGAAACCTG AGTTGGAAGAATG |  
| HNRPUL1 | SAGE: GCACCTCCTA | MPSS: ATACAGTGAGGCT |  
| HNRPLL | SAGE: TTGCCTTGCT CCTCTGTTTC ATAGACTGTG | MPSS:  
CTGTTCTGTAATA TGCTGACAAATTT |  
| HNRPA0 | SAGE: TTGACGTTGA CCTGAAATTT AAGAGCGGGC  
TCTAACATTT | MPSS: TTTGTAGCACCAT CCATGCCTGAAAT  
CTCCCGGGGCGGC CATTCCGTACCGT |  
| HNRPCL1 | SAGE: AACTCCCGTG | MPSS: TTCCAAGTCTGGA |  
| HNRPD | SAGE: ATGTAGTAGT | MPSS: TAAGATGATTATT |  
| HNRPDL | SAGE: TTAAACCTCA | MPSS: TAGAGGAGGATTT |  
| HNRPF | SAGE: TTTGTTTATT | MPSS: TCCCTTATATTCT  
TTTTACACCACAT |  
| HNRPG | SAGE: CCTATGTAAG TTTAATTTTA AGTTCTTCCA | MPSS:  
AAATGTTTATGTA |  
| HNRPGT | SAGE: GAAAGGGGCT | MPSS: TTCCACAAAACAT  
TGATAGAGGGGGA |  
| HNRPK | SAGE: TCCCTGGCAT | MPSS: ATTACCATTACAG |  
| HNRPL | SAGE: TACTCTTGGC | MPSS: TTGTATTCCTTTT |  
| HNRPM | SAGE: AAGCTGAGTG | MPSS: GCATGGCCACCGG  
ACAGCGCCCCCAG |  
| SYNCRIP | SAGE: GTATCTTAAT | MPSS: ATGGAATCAAATA |  
| HNRPR | SAGE: TAAGATTTCA | MPSS: TACATTCTTCAAA  
CCATGAACATTGC |  
| HNRPU | SAGE: AATTGCATTA GAGTCAGCAT | MPSS:  
AGACAAATGTGTC TATATGAAGTTAG |  
| HTF9C | SAGE: CTGGGGTGCT GCTTGCTGGC | MPSS:  
TGGCCAGTCAAGG CTGGCCATCCGGA |  
| HTATSF1 | SAGE: CAGAATAATA | MPSS: TGAAGAGGATAGT |  
| IGF2BP2 | SAGE: TACTGGTTTA | MPSS: ACCTGTGTATGTC |  
| IF2B | SAGE: CCGATCACCG | MPSS: ACCGGACACAATC |  
| EIF3S4 | SAGE: CAGCCCAACC | MPSS: GTGTCCTGCCGCA  
GTGCGCGTGCCAT |  
| EIF3S9 | SAGE: GAAATAAAAG | MPSS: GTTTGAGTCAGTC |  
| EIF4H | SAGE: CATCTAAACT | MPSS: TTTTAAATAAAAG |  
| IGF2BP1 | SAGE: TGTCACCCCT | MPSS: CTGGTCCCCAAAA |  
| IGF2BP3 | SAGE: TATAATGTGC | MPSS: ATTCCTCATGTAT |  
| ILF3 | SAGE: TGAAAGTAAC TGAAAGTAAA | MPSS:  
AGCGGTTCTTTTT |  
| IREB1 | SAGE: GATAGGTCGG | MPSS: CACATAAAAAGAA |  
| IREB2 | SAGE: GATGTAAATG | MPSS: ATTTGATTGGAAT  
CCTCCTGGAACCTG |  
| JOSD2 | SAGE: GACCCTGGGG | MPSS: CTGAACCTGCCCT |  
| KHDRBS3 | SAGE: CGTAAAAAGG | MPSS: AGGCAAGCACAGC |  
| KHDRBS2 | SAGE: TTAATGGAAA | MPSS: AGAATAGCTCCCA |  
| KRR1 | SAGE: AAATCAAGAG TGACATCATT | MPSS:  
CCCTAGTTACTCC GATAAAGAATTGG |



**Supplementary file 4**

| LA | SAGE: ATGAAAATGG | MPSS: AGACCTGTAGAGA |  
| LARP4 | SAGE: CATAAAATGT TTAGTAAATG TTCAGAGTTC | MPSS:  
AGATGCTGTGCAG AGTGGCTGGGGTG TTCATAATAATTA |  
| LARP5 | SAGE: GATTTAAGAG | MPSS: TCCTGGGCGGAGT |  
| LARP7 | SAGE: CTAGATTTAA | MPSS: ACGAACAAGGTAT  
ACGAACAAAGGTA |  
| LKAP | SAGE: TAAAGAGTGG | MPSS: CACTTAACCTTGT |  
| ADAD2 | SAGE: GGTTGTGCGG | MPSS: TACAAGCTGGTGG |  
| LRPPRC | SAGE: ACTTATCCCG TTATTTTGAA TTACTIONTAA | MPSS:  
CCTATAAAAAAAAA TGTTTCTAAAGCG |  
| LSM5 | SAGE: ATTATCCTGG GTTATCCTGG | MPSS:  
ACTTAGAAAATTC AGATTTTGCTAAA |  
| MOV10L1 | SAGE: TGCTCAGCCT | MPSS: TGCAGTGGCTGAC  
CGGCCTGGCACGT |  
| MATR3 | SAGE: CACAAAAAAT | MPSS: TCTCCCGTTGAAA |  
| RNMT | SAGE: GTTGTATAAT | MPSS: TTAGCTCATAAAA  
CCAGGGCACTGTC |  
| MGC10433 | SAGE: TGGAAGGACC | MPSS: CGTGACAAGCGCA |  
| MGC27016 | SAGE: TGTTAATTTT | MPSS: ACTATCTGTACTG |  
| MINT | SAGE: GACTCGCAGA | MPSS: TCTTCCCCCAACT |  
| MKI67IP | SAGE: GCGACTTTTT AATTAATAAC | MPSS:  
TTTTCATATTTCT |  
| MSI1 | SAGE: GTGTTTCGAA | MPSS: TTTGTGGGGGGGC |  
| MSI2H | SAGE: CCTTATCTTC | MPSS: ACCAAAGCCAGGG |  
| MTHFSD | SAGE: GAAAATTAAC | MPSS: TGGAATATGCCAT |  
| MYEF2 | SAGE: GAATACCAAG CCTCCTGTAC GAATGTGATT | MPSS:  
CCACGATGTTAGA TCTAAATCTGCTG TATTACATGATTT |  
| SLC4A1AP | SAGE: ATCCTATTA | MPSS: CTATTAATAAAG |  
| NCBP1 | SAGE: TCAAGGTTTT | MPSS: TTCCTACAGCATC |  
| NCBP2 | SAGE: AGGACCAGCA | MPSS: TACATTGGGGCCT |  
| NHP2L1 | SAGE: TGTTCTCCAT TAGTATTTTC | MPSS:  
ATGGAGACCTGGC CAATCCATTCAGC |  
| NKRF | SAGE: TGATTTCCAG TTCCGGTTGC | MPSS:  
ATTTTGTATTAAT TTACTIONTATT |  
| NOL3 | SAGE: GAGCAAGGGG CTGGATAGGA | MPSS:  
CCAAACCTAGCCC GAGCCCCGACAAT |  
| NOL4 | SAGE: AAGAGACAAT | MPSS: CAGCTGAAATATT |  
| NOL8 | SAGE: AAGCCTTTTT | MPSS: ACAGAACTCCAG |  
| NONO | SAGE: CCCCCTGCTC | MPSS: TACCCTGCCTGTA  
TGTTATACCCCAT |  
| NOP56 | SAGE: TTTTCCTTCT | MPSS: TTGAAGAGACCGC  
CTTGGGGCTGAAA |  
| NOVA1 | SAGE: TGGTAGGGCA | MPSS: ATCTTAAGCTAAT |  
| NOVA2 | SAGE: GTTGCAGCTG | MPSS: TCCAAGAAGGGCG |  
| NPM1 | SAGE: CCTCTTCAGG | MPSS: AAAAGGACAAGAA  
TCTGTATGGCAGT |  
| NCL | SAGE: GTTTTTGCTT TACAAAACCA | MPSS: AATGACAGAGCCT

#### Supplementary file 4

|  
| NUFIP1 | SAGE: TGAAACAGTA | MPSS: CCCACACTGCCTT  
CTCTTGGTGTTTT |  
| HRB | SAGE: TGTACAAAGT | MPSS: ATGTTTTGCTACA |  
| NXF1 | SAGE: CCTCAGAAGC | MPSS: CCTCTCCTCGCCT |  
| NXF2 | SAGE: ATCACCATTT | MPSS: ACCATTTTATTTT |  
| PABP2 | SAGE: AATAAAGTTG | MPSS: TCCGTTCCGCTCC |  
| PABP3 | SAGE: GTTCTGATCA | MPSS: ACAGAGATAATCA |  
| PABP4 | SAGE: CCAAGAAAGA | MPSS: ACGGGAATGCTGC |  
| PABP5 | SAGE: CTCATTGTAA TTAAATTAAC | MPSS:  
ATGTTAAATTAAC |  
| PAIP1 | SAGE: TAAATAGTTC CAACTTCAAC | MPSS:  
CATACTTGGATGA |  
| C20orf119 | SAGE: GCTGCCAAAA | MPSS: ACGGGCATGCTGC |  
| PAPOLA | SAGE: TTGATCGAAG | MPSS: TACGAGATGACAG |  
| PAPOLB | SAGE: TGATGTACCT | MPSS: AGCAATACTTTAA |  
| PAPOLG | SAGE: AAAAGAGTCT TAATTCTTGT TAAAGAAAAA | MPSS:  
ATTATTTACCCCA CTCGGGTAAATCC |  
| PCBP1 | SAGE: AATTTTATTT | MPSS: CATATTAGTTTTA |  
| PCBP2 | SAGE: ATCCATCTGT | MPSS: CATCTGTGTAGTT |  
| PCBP3 | SAGE: GAGGATGTTG | MPSS: ACCATCACGGGGA |  
| POLDIP3 | SAGE: CCTCTATGTT | MPSS: TTGGGAGACCGGG  
AGCTTGAAGAGGA |  
| SF3B14 | SAGE: TGATCACCTA | MPSS: CACCAAAATAAAT |  
| PNPT1 | SAGE: AGGCAAGAGA | MPSS: AACGAAAGATTAA |  
| PPP1R8 | SAGE: CTTTATGTGT | MPSS: AAAAAGAAGGCTT |  
| PPIE | SAGE: GGCAGGCTGT | MPSS: ATCGCCGACTGTG |  
| PPIL4 | SAGE: TGTAAGATGT CCAATCAAAA | MPSS:  
TTTATGAAAGAGA TTATATTAGATGA |  
| PPRC1 | SAGE: ACTCGATCAG | MPSS: CCCAGTGTTTGGA  
TTGACTCCAACCG |  
| PPARGC1A | SAGE: CCACCCTTTT | MPSS: AGTACTCATTTAC |  
| PPARGC1B | SAGE: GATTTTGACA | MPSS: CGTGCTAGCCTCA |  
| PRKRA | SAGE: TAACAAAGAA TAAGCAAAGA TTTGTTGTTG | MPSS:  
AACTTACTGAAAA |  
| PSMA1 | SAGE: GTCTGCGTGC | MPSS: GCTGAGCGATACT |  
| PSPC1 | SAGE: AAATATTAAA | MPSS: CGACACAGAGAAC |  
| PTBP1 | SAGE: CAGCTGGGGC AGCCACCTGA | MPSS:  
CCCTTTCCGTAAA CAGATGGGCTCCG |  
| PTBP2 | SAGE: GCTCAGAATC | MPSS: TGACTTTAATAAAA |  
| Q8TC92 | SAGE: TGAACCTGGC | MPSS: CAAGCCTCAACAT |  
| QKI | SAGE: TTGTTTGTA | MPSS: ATTTAAACTGAAC |  
| RAD51AP1 | SAGE: TTAGCTGTTA | MPSS: AATTTTAAATAAAA |  
| RAE1 | SAGE: GATTTCAACC | MPSS: AGCCCATCTCAGC |  
| RAVR2 | SAGE: AAATTTATAT | MPSS: TAATAAAAAGGGTT |  
| RBM12B | SAGE: ATTGACTTTG | MPSS: TAAATGATAGGCC |  
| RBM15B | SAGE: CTCTCCTTGC | MPSS: CAGAACATGACAA |

**Supplementary file 4**

| RBM35A | SAGE: CCTTCTTGCT | MPSS: TTGGAATAATAAA  
GAAAAGGAATTC |  
| RBM35B | SAGE: GAATGTCCTT | MPSS: TTCTCTTCCTTAA  
CCAATGTTCTACC |  
| RBM10 | SAGE: TTGGGTGTCC | MPSS: ACGTCCTGTTTTG |  
| RBM11 | SAGE: AAAATGAGCA TTGCCTAGCA | MPSS:  
ATTCCCTTTTTAT |  
| RBM12 | SAGE: ATATTTTCAA GAGCAGCTGG GTGGCCTTTG  
GAGTCTAGAT AATACAGATT | MPSS: ACTAGATACTGCC CCACCTTTGCTCC  
TTCATATTGCTGT |  
| RBM14 | SAGE: TGGGCCTTCC | MPSS: TCGGTTTCCCCT |  
| RBM15 | SAGE: GTTCCTGTTT | MPSS: ATTGTCCGTGGGT  
ATTGTCCGTGGTG ATTGTCCGTGCAA |  
| RBM16 | SAGE: GTAGGTAAAC | MPSS: CTGAACTTTATGA |  
| RBM18 | SAGE: TTAGCATTTG AGTATAAATG | MPSS:  
ATAACAAGAATGA |  
| RBM19 | SAGE: GTGGACGCGT | MPSS: CTGGAGCAGCTGG |  
| RBM22 | SAGE: AAATTACTGT | MPSS: TTCTCTTTCCTCT |  
| RBM23 | SAGE: TGTGAGCCCT | MPSS: TGTCTGTGAGGC |  
| RBM24 | SAGE: ACTCTCCTGT | MPSS: TTCTAATCTATTC |  
| RBM25 | SAGE: TCTGAGTACT | MPSS: AGAATTTACCAG |  
| RBM26 | SAGE: AGTCCTTATG | MPSS: TTGTATTTTGAAA |  
| RBM27 | SAGE: CTCATAGAGG GTTTTTATGT GATAATCTCT | MPSS:  
AACTTGATGTCTT CACAGCAATGACA |  
| RBM28 | SAGE: ATGCTTCTTG | MPSS: CAAGCCTGCAACT |  
| RBM33 | SAGE: GAGAGATGAC | MPSS: TGTGTGAAGAATG |  
| RBM34 | SAGE: CGTTCTGTTA | MPSS: GGTTTTTGTGGGG |  
| RBM38 | SAGE: AGGTGAGAGG | MPSS: CACAGCATTCAGG |  
| RBM39 | SAGE: AACGAAAGAG GCAGGTGGTT | MPSS:  
GAAGATTTAGAGG CCTGCATTTCCCTG TACTGTCATTTGT |  
| RBM3 | SAGE: ATTATCCAGG | MPSS: ATCAAACCTGATTA |  
| RBM41 | SAGE: TGCTACAGGT | MPSS: TAGGATTTATGTA |  
| RBM4 | SAGE: TTCTCTTCTC | MPSS: ACTTTTTTTTCTTT |  
| RBM5 | SAGE: TGTAGCCTAT | MPSS: TTAGGGTGAACCA |  
| RBM6 | SAGE: GGATACAACC | MPSS: GTAAACTTGTTGA |  
| RBM7 | SAGE: TAATGGAGAT | MPSS: CTTTTTAATACCA |  
| RBM8A | SAGE: CAGCCTTGGA AGGAAGCCAC ATAGTGATAG | MPSS:  
TTCACGAGGCTGG TCGTGTATGTCCC AAATCTTAAATCA |  
| RBM9 | SAGE: CCCTTGCCCC | MPSS: TCTTACGACAGAA |  
| RBMS2 | SAGE: GTGGTCGCAG | MPSS: AAAAAAATTTTC |  
| RBMS3 | SAGE: AATCATTCTA | MPSS: GCTAGCAAAAGCA |  
| RBP56 | SAGE: ATCCATAGTG | MPSS: CATAGTGAAATTG |  
| RBPMS | SAGE: TTGAATTTGT | MPSS: CTGAAATTCCGCA |  
| RED1 | SAGE: ATGGGGGGTG | MPSS: TCCAACATAGAGG |  
| RED2 | SAGE: TACTGTGAGG | MPSS: TTCACATCACCTC |  
| RENT1 | SAGE: GCGGGGTGAC | MPSS: CGAACACCTCCAG  
AGTGCCGGCCCTA |

**Supplementary file 4**

| RIB1 | SAGE: TGTTTTTTTT GAGGCCAGTG | MPSS:  
GACCACATCCTGG |  
| RKHD3 | SAGE: CTCTATAAAT GAGTGCGCCA | MPSS:  
CTTTTTGAATGTT CGAGAGGAGCTTG |  
| RPL12 | SAGE: ACATCATCGA | MPSS: ATTTGACAACTGA |  
| RPL13 | SAGE: CTGGGTCTCC CCCGTCCGGA CTTGGTGCTG | MPSS:  
CGAGGAGGCGGAA |  
| RPL18 | SAGE: GGAGTGGACA | MPSS: CTA CTCTCTTATT |  
| RPL22 | SAGE: TAGTAAGTCA GATGCTGCCA | MPSS:  
ATATTTTCTATTA ACCGTGACATCCG |  
| RPL28 | SAGE: TGCAGTAATG | MPSS: CATGTGCAGTAAT  
CGCAAGAACAAGT |  
| RPL34 | SAGE: TTTGATAATG TGTGCTAAAT | MPSS:  
ACTAATATAGTAT AAGCGTGCTTTCC |  
| RPL3L | SAGE: GGCCCCAAA | MPSS: TCTTTGAGCAAAA |  
| RPLP2 | SAGE: GGATTTGGCC | MPSS: TTGGACAGCGTGG |  
| MRPL3 | SAGE: TTAAAGGCCG | MPSS: TCGGTAAAAATCT |  
| MRPL12 | SAGE: TGTCTGTGCC | MPSS: AAGGCGGCCCTGG |  
| MRPL23 | SAGE: CTCGAGGAGG | MPSS: TGTTTCCCGAGAA |  
| RNASEL | SAGE: TCAATTA AAA AATCATTGTG CTGCAGGTTG | MPSS:  
TG TAGTGATGGAG |  
| RNASE1 | SAGE: TTAACCCCTC | MPSS: CAGGCTTTTCTGG  
CAGGTCACCACCT CAGGTCAC TTTGT |  
| RNH1 | SAGE: TGTTTATAAA | MPSS: AACAAAGAGGACT |  
| RO60 | SAGE: TCAATGGCCT | MPSS: ACACAAATAACAG |  
| HNRPA2B1 | SAGE: GTGTAATAAG | MPSS: ATGGTGT AATAAG |  
| HNRPA3 | SAGE: CCAGTGTGCA GAAATTGGTC | MPSS:  
CCAAGTCCAGGAA ATTGTTAATTACT CATAGTCAGAAAA |  
| ROD1 | SAGE: GTTTCTACAA | MPSS: TGTGGAAGAAGCA |  
| RPL18A | SAGE: AAGGTGGAGG | MPSS: AAGTTCCCGCTGC |  
| RPL7 | SAGE: GAGGGTGTAG | MPSS: AAGCGCCTGAGAA |  
| RPP29 | SAGE: TTTTCTGAGT | MPSS: AAATAAAGGAGGT |  
| RPS17 | SAGE: GGCCGCGTTC | MPSS: CTGACACTAAGGA |  
| RPS3 | SAGE: CCCAGCCAG AGAATCACCC | MPSS:  
ATGCTGCCCTGGG CTAGGTGGGTAAG |  
| RPS4Y1 | SAGE: TGAAGGATGC | MPSS: ACCAACAGGGAAA |  
| RPS5 | SAGE: CCTTCGAGAT | MPSS: ATACACCTGCTCA |  
| RPS9 | SAGE: CCAGTGGCCC GCCATCTCAT | MPSS:  
AGCGCTTTACAAA AGCGCTTTAAAAA |  
| MRPS15 | SAGE: CTGAGGGTTCG | MPSS: CGCAGTTATGAAG |  
| RTCD1 | SAGE: GCATTAGCCA | MPSS: ATCGCTTGGTAAA |  
| SNRP70 | SAGE: GAGTCTGAGG | MPSS: GTGACCGTGACCG  
GTGACCGTGCCG |  
| SNRPB2 | SAGE: CTATGAAGAT | MPSS: ACCTATGCCAAGA |  
| SAFB1 | SAGE: CAGGGCGGGT | MPSS: ACAAGAGGTGGCA |  
| SAFB2 | SAGE: TTGTAGCTCA GACGAATGAT | MPSS:  
TTTTTAAAAGCAA AAAATTGAAAAA |

**Supplementary file 4**

| SAM68 | SAGE: TGTAAGTCTG | MPSS: CTCATGAATTAAA |  
| SART3 | SAGE: GAGAGGACAG | MPSS: CAAGCTGCGTGAT |  
| SCAND1 | SAGE: ATCGGGCCCG | MPSS: GGGCCCGGGGGCC |  
| SF1 | SAGE: AAGTGATTCT | MPSS: ACCTGAGCTGCCT |  
| SF3B4 | SAGE: GATACACTGG | MPSS: TCCCATGGGTCAC |  
| SFPQ | SAGE: AAAAAAAXXX CGTACTGAGC | MPSS:  
TATCCTTTACTTG CCTATGGTTCAGG |  
| SFRS11 | SAGE: GGCATTTTTG | MPSS: TCATTCCAGAGAA  
CCAAGTTGAATCA |  
| SFRS12 | SAGE: AGAAGGATCG ACAAGTCTGA GTGGCCGAAA | MPSS:  
GAGACAAAAAAA TAAGAGCCCACAT TAACAGCTTTTCC |  
| SFRS15 | SAGE: GCCCCTTTGT | MPSS: TTTTGGAAATAGG |  
| SFRS1 | SAGE: GAGCGGGATC | MPSS: AGATTACCAGGAA |  
| SFRPS2B | SAGE: GTTTATCTTT | MPSS: ATATCTACATGTA |  
| SFRPS2 | SAGE: GTGTATCTTT | MPSS: ATATCAACATGTA |  
| SFRPS3 | SAGE: CATAACCTTC CTGTCAATTTG | MPSS:  
CATCATGATGTAA ATACGAGGCATGT |  
| SFRS4 | SAGE: GCCCACAGTA | MPSS: TAGGTCCCCTCA |  
| SFRPS5 | SAGE: AGACAAGCTG | MPSS: AGTTGACAGTGGC |  
| SFRS6 | SAGE: CCGTAGTGCC AAGACCCTCT | MPSS:  
ATACTTGTAATT TGCTGGCAGGGTT |  
| SFRS7 | SAGE: TAGCTAATAT CCTCGGAGAT | MPSS:  
TTTATACTAATTG TGGATTACTATGT |  
| SFRPS9 | SAGE: AGGGTGAAAC | MPSS: AACAGTTACTGTG |  
| SIAHBP1 | SAGE: GTGGACCCCA | MPSS: TTTGTGGAGTTTT |  
| SLBP | SAGE: TAAAATTGCT | MPSS: CTCCAGCGGAAGA |  
| SLTM | SAGE: TTCCCAACTA ATTGCTTTTC | MPSS:  
ACAGCACTATCCT |  
| SNRPA | SAGE: CCTGCCCCTT | MPSS: TCCTTTGCCAAGA |  
| SON | SAGE: TTAAATAGAG GAACGTCTTA TGTATTACAG | MPSS:  
ATTTATTCAATAA TGCTGCCAGCCCG AGCACTAAGTCCT |  
| SPF45 | SAGE: GCTGTTGCAT | MPSS: AGAAATGACAAAT  
CCTTTTTTATTTT |  
| SR140 | SAGE: AGCAACTGCA AAACAGATGA TTCTGAGCAA | MPSS:  
TGCTGACAGTAGT AAAAAATCCTCC TTCAGATGCACAT |  
| SRP14 | SAGE: TCTGTTTATC | MPSS: AGCACTGTGGTGA  
AGCACTGTGGGAG |  
| SRP68 | SAGE: GATTTGAAAT ATATTAAATC | MPSS:  
CGACTCTATGACA |  
| SRP72 | SAGE: AAGAAGATAT | MPSS: CAGAGAAAGCCAA |  
| SRrp35 | SAGE: GAAGACATTC | MPSS: TCGAAGTTATCGT |  
| STAU1 | SAGE: GAATGTAAGT | MPSS: AATAAACAGCTAC  
TCCATGTAGTCCA |  
| STAU2 | SAGE: TAGATTGTTT TTGGAATCCA TTCGGATTTT | MPSS:  
TCAATTTATATAA AAAAATAAATAAT CAAGGAGATGCTC |  
| STRBP | SAGE: ACAAGCGCTT | MPSS: ACAAATAAACTGC |  
| SUPV3L1 | SAGE: CTGAAACAGC | MPSS: TCCAGAAAGAACT |

**Supplementary file 4**

| SURF6 | SAGE: GATGGAAACT | MPSS: CGGGACCTTCAGA |  
| GARS | SAGE: GGCTGATGTG | MPSS: TCTGAGCTGCCCA |  
| HARS | SAGE: TGTGGGGCTC | MPSS: AAGGCTGAGCTGC |  
| MARS | SAGE: CCCACGGTTA | MPSS: TAAAGAAACAGTT |  
| SYNJ1 | SAGE: CTCCTTTTAT | MPSS: TAAGGAAGGTGAA |  
| SYNJ2 | SAGE: ATACCTATTA ACTGAGCAGC | MPSS:  
GTGGCTGTCAAAT ATGGACACAAAAC |  
| SYWC | SAGE: TGCAGGCCTG GAGGACTCCG | MPSS:  
ACTCTGCCCTCTT GCAGAGCACCAGG |  
| TACC1 | SAGE: TTTCATTGCC | MPSS: CAGGCATTTCTTT |  
| TACC2 | SAGE: GACAGGTTCT GGCAATGAGA | MPSS:  
ATAACCAAGGAGA |  
| TARDBP | SAGE: TTTATGGTAC GACTGAGCTT | MPSS:  
TTGAGTTGTTTTA ATGGTGTACACAGT |  
| TARB1 | SAGE: TGCCTTAAAC | MPSS: TGGGAGTACACCA |  
| TDRKH | SAGE: CTCAGCCCTG | MPSS: TATGTGCCTTCTC  
CCTCCCAACCCT TACTTATATGATA |  
| Tenr | SAGE: TGAAATAGGC | MPSS: CTGGATTGTGAAA |  
| TEP1 | SAGE: GACTAGTGCC | MPSS: CATAATCCTTGCC |  
| THOC4 | SAGE: TAAAGGTTTT | MPSS: GCTCTGGTCGCAG |  
| TIA1 | SAGE: TGAAAATCAA GCAACAGGAA | MPSS:  
CTTGTTTCAAACA TCAGCCCAGAAAT |  
| TIAR | SAGE: GTATAATAAG ATTTTTCTTT | MPSS:  
AGAATGTTAAGAC AATCACCTTCTGC |  
| TNRC6A | SAGE: ACTTTTTGGC | MPSS: TCAATCACTGGAA |  
| TNRC6C | SAGE: GCAACCAAAA | MPSS: TGCGAGAAAGCAC |  
| TNRC4 | SAGE: GCTATGCTTC | MPSS: ATTTTCTTTAGGA |  
| TRA2A | SAGE: TGGGGAAAAG | MPSS: TGCATTTATCATG |  
| TRA2B | SAGE: GATGAACTGA TATTTTTTTA | MPSS:  
GAAGCCTGTGTAA |  
| TRBP2 | SAGE: TATCTGCGCA | MPSS: CGTCCTCATTTTA |  
| TRSPAP1 | SAGE: ATGTGAGGGA | MPSS: TCTTTAAGGGCTG  
CCTGCCATGATGT |  
| TUT1 | SAGE: GCCCCTGAAG | MPSS: TCCATCATTTCTT |  
| U2AF1 | SAGE: CCATTTTTAC | MPSS: ACTGGCATGGCCG |  
| U2AF1L4 | SAGE: GAGACCTTCT | MPSS: TGGGCGATTCTGA |  
| U2AF2 | SAGE: CAGGGCCTGA | MPSS: TTTGTGGAGTTCA |  
| HDLBP | SAGE: ACCTCAGGAA | MPSS: AAAAAGAACAGAA |  
| YBOX1 | SAGE: CGGAGACCCT GGGTTTTTAT | MPSS:  
GGAGAGTGCTCCC CACCAGCTGAGAA |  
| YBOX2 | SAGE: TGCCACCTGA | MPSS: TGTCATGTGCCAC |  
| ZCRB1 | SAGE: TTAATACTAT TATTGTCTTT | MPSS:  
CTGCTCTTGACAG |  
| ZNF638 | SAGE: GAGAAATATC | MPSS: TAAAAACCATGAT |  
+-----+-----+-----+-----+-----+

Supplementary file 7

| RBPs     | Tag freque | Tissue               |
|----------|------------|----------------------|
| A2BP1    | 3.35227    | Retina               |
| A2BP1    | 3.96944    | Brain_cerebellum     |
| A2BP1    | 6.40502    | Brain_cortex         |
| A2BP1    | 7.41468    | Muscle               |
| APOBEC3F | 3.65063    | Spinal_cord          |
| APOBEC3F | 37.1575    | White_Blood_Cells    |
| APOBEC3F | 3.9056     | Retina               |
| APOBEC1  | 11.134     | Muscle               |
| ACF      | 11.1803    | Retina               |
| ACF      | 3.20251    | Brain_cortex         |
| ACF      | 3.48943    | Vascular_endothelium |
| ACF      | 3.65063    | Spinal_cord          |
| ACF      | 5.45308    | Stomach              |
| ACF      | 6.07128    | White_Blood_Cells    |
| ACF      | 6.76376    | Lung                 |
| ACF      | 8.34527    | Prostate             |
| ACIN1    | 15.488     | White_Blood_Cells    |
| ACIN1    | 21.4265    | stem_cell            |
| ACIN1    | 3.01623    | Liver                |
| ACIN1    | 3.20251    | Brain_cortex         |
| ACIN1    | 3.65063    | Spinal_cord          |
| ACIN1    | 3.88493    | Brain_astrocyte      |
| ACIN1    | 3.95946    | Breast               |
| ACIN1    | 5.56351    | Prostate             |
| ACIN1    | 7.01471    | Vascular_endothelium |
| ADAT1    | 3.72675    | Retina               |
| AKAP1    | 10.4855    | Breast               |
| AKAP1    | 10.5447    | stem_cell            |
| AKAP1    | 11.6548    | Brain_astrocyte      |
| AKAP1    | 12.0391    | Heart                |
| AKAP1    | 15.8777    | Brain_cerebellum     |
| AKAP1    | 16.8699    | Prostate             |
| AKAP1    | 17.5368    | Vascular_endothelium |
| AKAP1    | 22.268     | Muscle               |
| AKAP1    | 27.2654    | Stomach              |
| AKAP1    | 3.45012    | Thyroid              |
| AKAP1    | 4.03145    | Colon                |
| AKAP1    | 7.43149    | White_Blood_Cells    |
| AKAP1    | 7.59648    | Retina               |
| AKAP1    | 9.60753    | Brain_cortex         |
| ANKHD1   | 10.95189   | Spinal_cord          |
| ANKHD1   | 14.77667   | Breast               |
| ANKHD1   | 18.5367    | Muscle               |
| ANKHD1   | 21.88037   | stem_cell            |
| ANKHD1   | 28.99878   | White_Blood_Cells    |
| ANKHD1   | 3.01623    | Liver                |
| ANKHD1   | 31.72538   | Prostate             |
| ANKHD1   | 3.45012    | Thyroid              |
| ANKHD1   | 4.03145    | Colon                |
| ANKHD1   | 5.30507    | Retina               |
| ANKHD1   | 6.76376    | Lung                 |
| ANKHD1   | 8.63353    | Vascular_endothelium |

© 2009 Landes Bioscience.  
Do not distribute.

Supplementary file 7

| RBPs     | Tag freque | Tissue               |
|----------|------------|----------------------|
| ANKHD1   | 9.60753    | Brain_cortex         |
| ANKRD17  | 10.16234   | Placenta             |
| ANKRD17  | 11.8337    | stem_cell            |
| ANKRD17  | 20.6252    | Breast               |
| ANKRD17  | 3.01623    | Liver                |
| ANKRD17  | 3.96944    | Brain_cerebellum     |
| ANKRD17  | 5.45308    | Stomach              |
| ANKRD17  | 5.8584     | Retina               |
| ANKRD17  | 6.98503    | Eye                  |
| ANKRD17  | 7.01472    | Vascular_endothelium |
| ANKRD17  | 7.87355    | White_Blood_Cells    |
| ANKRD17  | 8.98387    | Brain_cortex         |
| ASCC1    | 3.62053    | stem_cell            |
| ASCC1    | 3.65063    | Spinal_cord          |
| ASCC1    | 3.6733     | White_Blood_Cells    |
| ASCC1    | 3.71133    | Muscle               |
| ASCC1    | 3.72675    | Retina               |
| ASCC1    | 3.87282    | Vascular_endothelium |
| ASCC1    | 4.2448     | Brain_cortex         |
| ASCC1    | 5.57748    | Prostate             |
| ASCC1    | 9.63124    | Heart                |
| BRUNOL4  | 12.81      | Brain_cortex         |
| BRUNOL4  | 3.49516    | Breast               |
| BRUNOL4  | 3.70734    | Muscle               |
| BRUNOL4  | 3.9056     | Retina               |
| BRUNOL4  | 4.03145    | Colon                |
| BRUNOL4  | 7.22343    | Heart                |
| BRUNOL4  | 8.36622    | Prostate             |
| BRUNOL5  | 12.8602    | Vascular_endothelium |
| BRUNOL5  | 19.2151    | Brain_cortex         |
| BRUNOL5  | 3.71133    | Muscle               |
| BRUNOL5  | 6.70455    | Retina               |
| BRUNOL5  | 7.76986    | Brain_astrocyte      |
| BRUNOL6  | 11.72993   | Brain_cortex         |
| BRUNOL6  | 20.11367   | Retina               |
| BRUNOL6  | 3.65063    | Spinal_cord          |
| BRUNOL6  | 4.03145    | Colon                |
| BRUNOL6  | 7.93888    | Brain_cerebellum     |
| CCBL2    | 3.20251    | Brain_cortex         |
| CCBL2    | 3.49516    | Breast               |
| CCBL2    | 3.96944    | Brain_cerebellum     |
| CCBL2    | 5.17518    | Thyroid              |
| CCBL2    | 5.27235    | stem_cell            |
| RCAN3    | 14.863     | White_Blood_Cells    |
| RCAN3    | 3.37399    | Prostate             |
| RCAN3    | 3.49516    | Breast               |
| RCAN3    | 5.45308    | Stomach              |
| RCAN3    | 5.95037    | stem_cell            |
| CDKN2AIP | 19.7973    | Breast               |
| CDKN2AIP | 3.20251    | Brain_cortex         |
| CDKN2AIP | 3.37399    | Prostate             |
| CDKN2AIP | 3.45012    | Thyroid              |

©2009 Landes Bioscience.  
Do not distribute.



*Supplementary file 7*

| RBPs     | Tag freque | Tissue               |
|----------|------------|----------------------|
| CDKN2AIP | 3.50736    | Vascular_endothelium |
| CDKN2AIP | 3.79824    | Retina               |
| CDKN2AIP | 3.87199    | White_Blood_Cells    |
| CDKN2AIP | 3.96944    | Brain_cerebellum     |
| CDKN2AIP | 4.48395    | stem_cell            |
| CDKN2AIP | 4.50918    | Lung                 |
| CDKN2AIP | 4.81562    | Heart                |
| CDKN2AIP | 5.08117    | Placenta             |
| CDKN2AIP | 9.31337    | Eye                  |
| CIRBP    | 10.3126    | Breast               |
| CIRBP    | 11.8561    | Placenta             |
| CIRBP    | 12.0754    | Thyroid              |
| CIRBP    | 13.6327    | Stomach              |
| CIRBP    | 20.1136    | Retina               |
| CIRBP    | 23.3096    | Brain_astrocyte      |
| CIRBP    | 28.5093    | stem_cell            |
| CIRBP    | 37.1133    | Muscle               |
| CIRBP    | 37.1575    | White_Blood_Cells    |
| CIRBP    | 39.6944    | Brain_cerebellum     |
| CIRBP    | 43.7104    | Prostate             |
| CIRBP    | 4.50918    | Lung                 |
| CIRBP    | 51.2235    | Eye                  |
| CIRBP    | 59.6251    | Vascular_endothelium |
| CIRBP    | 7.22343    | Heart                |
| CIRBP    | 7.30127    | Spinal_cord          |
| CIRBP    | 73.6577    | Brain_cortex         |
| CIRBP    | 8.06289    | Colon                |
| CNOT4    | 3.37399    | Prostate             |
| CNOT4    | 3.50736    | Vascular_endothelium |
| CNOT4    | 3.6733     | White_Blood_Cells    |
| CNOT4    | 3.95946    | Breast               |
| CNOT4    | 4.03145    | Colon                |
| COVA1    | 3.37399    | Prostate             |
| COVA1    | 3.79824    | Retina               |
| COVA1    | 3.93229    | White_Blood_Cells    |
| COVA1    | 4.93635    | stem_cell            |
| CPEB2    | 11.80785   | Prostate             |
| CPEB2    | 12.14256   | White_Blood_Cells    |
| CPEB2    | 15.43225   | Vascular_endothelium |
| CPEB2    | 17.63966   | stem_cell            |
| CPEB2    | 3.01623    | Liver                |
| CPEB2    | 3.43755    | Breast               |
| CPEB2    | 3.79824    | Retina               |
| CPEB2    | 3.88493    | Brain_astrocyte      |
| CPEB2    | 3.96944    | Brain_cerebellum     |
| CPEB2    | 4.65669    | Eye                  |
| CPEB2    | 5.08117    | Placenta             |
| CPEB2    | 7.30127    | Spinal_cord          |
| CPEB2    | 7.41468    | Muscle               |
| CPEB4    | 10.5221    | Vascular_endothelium |
| CPEB4    | 3.49516    | Breast               |
| CPEB4    | 3.65063    | Spinal_cord          |

©2009 Landes Bioscience.  
Do not distribute.

*Supplementary file 7*

| RBPs   | Tag freque | Tissue               |
|--------|------------|----------------------|
| CPEB4  | 3.96944    | Brain_cerebellum     |
| CPEB4  | 4.03145    | Colon                |
| CPEB4  | 4.2448     | Brain_cortex         |
| CPEB4  | 7.74398    | White_Blood_Cells    |
| CPSF5  | 14.16632   | White_Blood_Cells    |
| CPSF5  | 3.01623    | Liver                |
| CPSF5  | 3.35227    | Retina               |
| CPSF5  | 3.45012    | Thyroid              |
| CPSF5  | 3.65063    | Spinal_cord          |
| CPSF5  | 3.71133    | Muscle               |
| CPSF5  | 3.93424    | Placenta             |
| CPSF5  | 3.96944    | Brain_cerebellum     |
| CPSF5  | 43.077     | stem_cell            |
| CPSF5  | 4.81562    | Heart                |
| CPSF5  | 6.39346    | Breast               |
| CPSF5  | 7.74564    | Vascular_endothelium |
| CPSF5  | 8.68568    | Prostate             |
| CPSF6  | 10.3504    | Thyroid              |
| CPSF6  | 13.7502    | Breast               |
| CPSF6  | 23.8969    | stem_cell            |
| CPSF6  | 4.03145    | Colon                |
| CPSF6  | 4.2448     | Brain_cortex         |
| CPSF6  | 5.8584     | Retina               |
| CPSF6  | 6.24434    | Prostate             |
| CPSF6  | 8.09504    | White_Blood_Cells    |
| CSDC2  | 12.0391    | Heart                |
| CSDC2  | 3.65063    | Spinal_cord          |
| CSDC2  | 3.9056     | Retina               |
| CSDC2  | 3.96944    | Brain_cerebellum     |
| CSDC2  | 5.1441     | Vascular_endothelium |
| CSDC2  | 6.40502    | Brain_cortex         |
| CSTF2  | 3.6733     | White_Blood_Cells    |
| CSTF2  | 3.88493    | Brain_astrocyte      |
| CSTF2  | 3.9056     | Retina               |
| CSTF2  | 3.96944    | Brain_cerebellum     |
| CSTF2  | 6.9421     | stem_cell            |
| CSTF2  | 6.97885    | Vascular_endothelium |
| CSTF2  | 8.06289    | Colon                |
| CSTF3  | 3.37399    | Prostate             |
| CSTF3  | 3.38745    | Placenta             |
| CSTF3  | 3.43755    | Breast               |
| CSTF3  | 3.70734    | Muscle               |
| CSTF3  | 3.88493    | Brain_astrocyte      |
| CSTF3  | 3.95159    | White_Blood_Cells    |
| CSTF3  | 4.58266    | stem_cell            |
| CSTF3  | 6.3672     | Brain_cortex         |
| CSTF3  | 6.98503    | Eye                  |
| CSTF3  | 7.93887    | Brain_cerebellum     |
| CSTF2T | 11.53157   | stem_cell            |
| CSTF2T | 13.6696    | Retina               |
| CSTF2T | 18.09735   | Liver                |
| CSTF2T | 3.37399    | Prostate             |

© 2009 Landes Bioscience.  
Do not distribute.

Supplementary file 7

| RBPs   | Tag freque | Tissue               |
|--------|------------|----------------------|
| CSTF2T | 35.13292   | Placenta             |
| CSTF2T | 3.88493    | Brain_astrocyte      |
| CSTF2T | 3.96944    | Brain_cerebellum     |
| CSTF2T | 4.03145    | Colon                |
| CSTF2T | 4.81562    | Heart                |
| CSTF2T | 5.17518    | Thyroid              |
| CSTF2T | 5.45308    | Stomach              |
| CSTF2T | 7.30127    | Spinal_cord          |
| CSTF2T | 7.41867    | Muscle               |
| CSTF2T | 7.74563    | Vascular_endothelium |
| CSTF2T | 7.92817    | White_Blood_Cells    |
| CSTF2T | 8.36021    | Brain_cortex         |
| CUGBP1 | 3.35227    | Retina               |
| CUGBP1 | 3.95159    | White_Blood_Cells    |
| CUGBP1 | 4.03145    | Colon                |
| CUGBP2 | 10.2882    | Vascular_endothelium |
| CUGBP2 | 15.7471    | White_Blood_Cells    |
| CUGBP2 | 16.0126    | Brain_cortex         |
| CUGBP2 | 3.37399    | Prostate             |
| CUGBP2 | 3.68956    | stem_cell            |
| CUGBP2 | 3.88493    | Brain_astrocyte      |
| CUGBP2 | 3.96944    | Brain_cerebellum     |
| CUGBP2 | 6.76376    | Lung                 |
| CUGBP2 | 7.41867    | Muscle               |
| DAZAP1 | 11.127     | Prostate             |
| DAZAP1 | 11.6185    | Vascular_endothelium |
| DAZAP1 | 12.0943    | Colon                |
| DAZAP1 | 33.0597    | White_Blood_Cells    |
| DAZAP1 | 3.45012    | Thyroid              |
| DAZAP1 | 3.71133    | Muscle               |
| DAZAP1 | 45.7748    | stem_cell            |
| DAZAP1 | 6.40502    | Brain_cortex         |
| DAZAP1 | 6.98503    | Eye                  |
| DAZAP1 | 7.76986    | Brain_astrocyte      |
| DAZAP1 | 7.91891    | Breast               |
| DDX17  | 15.193     | Retina               |
| DDX17  | 27.1945    | Brain_astrocyte      |
| DDX17  | 3.37399    | Prostate             |
| DDX17  | 3.45012    | Thyroid              |
| DDX17  | 3.71575    | White_Blood_Cells    |
| DDX17  | 3.96944    | Brain_cerebellum     |
| DDX17  | 4.65669    | Eye                  |
| DDX17  | 5.90104    | Placenta             |
| DDX17  | 6.3672     | Brain_cortex         |
| DDX17  | 6.8751     | Breast               |
| DDX17  | 7.01471    | Vascular_endothelium |
| DDX17  | 7.90852    | stem_cell            |
| DDX53  | 3.37399    | Prostate             |
| DDX53  | 3.65063    | Spinal_cord          |
| DDX53  | 4.00156    | White_Blood_Cells    |
| DDX53  | 4.50918    | Lung                 |
| DDX53  | 7.37912    | stem_cell            |

©2009 Landes Bioscience.  
Do not distribute.

Supplementary file 7

| RBPs  | Tag freque | Tissue               |
|-------|------------|----------------------|
| DDX53 | 7.76986    | Brain_astrocyte      |
| DGCR8 | 10.81721   | Breast               |
| DGCR8 | 11.616     | White_Blood_Cells    |
| DGCR8 | 13.40953   | stem_cell            |
| DGCR8 | 23.6042    | Placenta             |
| DGCR8 | 3.01623    | Liver                |
| DGCR8 | 3.37399    | Prostate             |
| DGCR8 | 3.71133    | Muscle               |
| DGCR8 | 3.88493    | Brain_astrocyte      |
| DGCR8 | 3.96944    | Brain_cerebellum     |
| DGCR8 | 5.1577     | Brain_cortex         |
| DGCR8 | 5.8584     | Retina               |
| DGCR8 | 7.71615    | Vascular_endothelium |
| DHX30 | 10.1188    | White_Blood_Cells    |
| DHX30 | 10.4855    | Breast               |
| DHX30 | 10.5221    | Vascular_endothelium |
| DHX30 | 11.122     | Muscle               |
| DHX30 | 11.2729    | Lung                 |
| DHX30 | 11.6548    | Brain_astrocyte      |
| DHX30 | 13.496     | Prostate             |
| DHX30 | 13.9701    | Eye                  |
| DHX30 | 15.6836    | Placenta             |
| DHX30 | 17.2506    | Thyroid              |
| DHX30 | 19.2151    | Brain_cortex         |
| DHX30 | 20.2926    | stem_cell            |
| DHX30 | 27.786     | Brain_cerebellum     |
| DHX30 | 5.45308    | Stomach              |
| DHX30 | 6.03245    | Liver                |
| DHX30 | 7.30127    | Spinal_cord          |
| DHX30 | 7.59648    | Retina               |
| DHX30 | 9.63124    | Heart                |
| DHX9  | 10.9062    | Stomach              |
| DHX9  | 12.0754    | Thyroid              |
| DHX9  | 12.8602    | Vascular_endothelium |
| DHX9  | 13.496     | Prostate             |
| DHX9  | 25.7131    | White_Blood_Cells    |
| DHX9  | 27.9613    | Breast               |
| DHX9  | 3.01623    | Liver                |
| DHX9  | 3.71133    | Muscle               |
| DHX9  | 3.88493    | Brain_astrocyte      |
| DHX9  | 4.03145    | Colon                |
| DHX9  | 41.8502    | stem_cell            |
| DHX9  | 4.65669    | Eye                  |
| DHX9  | 5.1577     | Brain_cortex         |
| DHX9  | 5.8584     | Retina               |
| DHX9  | 7.30127    | Spinal_cord          |
| DHX9  | 9.01835    | Lung                 |
| DICER | 10.3154    | Brain_cortex         |
| DICER | 13.5498    | Placenta             |
| DICER | 3.71133    | Muscle               |
| DICER | 4.81562    | Heart                |
| DICER | 5.17518    | Thyroid              |

*Supplementary file 7*

| RBPs      | Tag freque | Tissue               |
|-----------|------------|----------------------|
| DICER     | 5.92739    | White_Blood_Cells    |
| DICER     | 6.59848    | stem_cell            |
| DICER     | 7.01471    | Vascular_endothelium |
| DICER     | 7.30127    | Spinal_cord          |
| DICER     | 7.8112     | Retina               |
| DICER     | 7.91891    | Breast               |
| DICER     | 8.17962    | Stomach              |
| DICER     | 9.01835    | Lung                 |
| DICER     | 9.31337    | Eye                  |
| DNAJC17   | 10.1188    | White_Blood_Cells    |
| DNAJC17   | 15.5397    | Brain_astrocyte      |
| DNAJC17   | 24.426     | Vascular_endothelium |
| DNAJC17   | 3.70734    | Muscle               |
| DNAJC17   | 3.79824    | Retina               |
| DNAJC17   | 4.48104    | Placenta             |
| DNAJC17   | 4.65669    | Eye                  |
| DNAJC17   | 5.48038    | stem_cell            |
| DNAJC17   | 6.24434    | Prostate             |
| DNAJC17   | 6.90024    | Thyroid              |
| DNAJC17   | 8.06289    | Colon                |
| DNAJC17   | 9.60753    | Brain_cortex         |
| DKC1      | 11.127     | Prostate             |
| DKC1      | 20.6253    | Breast               |
| DKC1      | 25.4513    | stem_cell            |
| DKC1      | 3.20251    | Brain_cortex         |
| DKC1      | 3.71133    | Muscle               |
| DKC1      | 3.88493    | Brain_astrocyte      |
| DKC1      | 3.93403    | Placenta             |
| DKC1      | 6.90024    | Thyroid              |
| DKC1      | 7.30127    | Spinal_cord          |
| DKC1      | 7.74398    | White_Blood_Cells    |
| DKC1      | 7.74563    | Vascular_endothelium |
| DKC1      | 9.49559    | Retina               |
| DKFZp434. | 3.48751    | stem_cell            |
| DKFZp434. | 3.95946    | Breast               |
| DKFZp434. | 4.03145    | Colon                |
| DKFZp434. | 5.57748    | Prostate             |
| DKFZp686f | 17.25058   | Thyroid              |
| DKFZp686f | 18.04128   | stem_cell            |
| DKFZp686f | 18.63321   | Vascular_endothelium |
| DKFZp686f | 19.08582   | Stomach              |
| DKFZp686f | 21.66911   | Breast               |
| DKFZp686f | 22.56675   | White_Blood_Cells    |
| DKFZp686f | 3.01623    | Liver                |
| DKFZp686f | 3.12217    | Prostate             |
| DKFZp686f | 3.71133    | Muscle               |
| DKFZp686f | 3.79824    | Retina               |
| DKFZp686f | 3.96944    | Brain_cerebellum     |
| DKFZp686f | 56.4402    | Colon                |
| DKFZp686f | 5.90103    | Placenta             |
| DKFZp686f | 6.98503    | Eye                  |
| DND1      | 3.49516    | Breast               |

© 2009 Landes Bioscience.  
Do not distribute.

*Supplementary file 7*

| RBPs   | Tag freque | Tissue               |
|--------|------------|----------------------|
| DND1   | 3.88493    | Brain_astrocyte      |
| DND1   | 4.95864    | stem_cell            |
| DND1   | 6.97885    | Vascular_endothelium |
| DND1   | 7.43149    | White_Blood_Cells    |
| DRB1   | 27.146     | Liver                |
| DRB1   | 3.68956    | stem_cell            |
| DRB1   | 3.71133    | Muscle               |
| DRB1   | 3.88493    | Brain_astrocyte      |
| DRB1   | 4.04752    | White_Blood_Cells    |
| DRB1   | 8.34527    | Prostate             |
| DSRAD  | 11.6548    | Brain_astrocyte      |
| DSRAD  | 19.2151    | Brain_cortex         |
| DSRAD  | 20.2439    | Prostate             |
| DSRAD  | 24.5515    | Vascular_endothelium |
| DSRAD  | 27.516     | stem_cell            |
| DSRAD  | 3.49516    | Breast               |
| DSRAD  | 3.65063    | Spinal_cord          |
| DSRAD  | 39.3229    | White_Blood_Cells    |
| DSRAD  | 3.96944    | Brain_cerebellum     |
| DSRAD  | 4.03145    | Colon                |
| DSRAD  | 4.65669    | Eye                  |
| DSRAD  | 4.81562    | Heart                |
| DSRAD  | 5.45308    | Stomach              |
| DSRAD  | 5.90104    | Placenta             |
| DSRAD  | 6.90024    | Thyroid              |
| DSRAD  | 7.41468    | Muscle               |
| DSRAD  | 9.04868    | Liver                |
| DUSP11 | 3.50736    | Vascular_endothelium |
| DUSP11 | 3.93229    | White_Blood_Cells    |
| DUSP11 | 4.606092   | stem_cell            |
| DUSP11 | 5.57748    | Prostate             |
| DUSP11 | 5.67955    | Retina               |
| DUSP11 | 6.76376    | Lung                 |
| DUSP11 | 6.93271    | Breast               |
| DUS2L  | 15.488     | White_Blood_Cells    |
| DUS2L  | 3.37399    | Prostate             |
| DUS2L  | 3.9056     | Retina               |
| DUS2L  | 4.03145    | Colon                |
| DUS2L  | 5.1441     | Vascular_endothelium |
| DUS2L  | 7.34039    | stem_cell            |
| DUS2L  | 9.31337    | Eye                  |
| E2AK2  | 3.20251    | Brain_cortex         |
| E2AK2  | 3.88493    | Brain_astrocyte      |
| E2AK2  | 4.03145    | Colon                |
| E2AK2  | 6.97885    | Vascular_endothelium |
| E2AK2  | 8.09504    | White_Blood_Cells    |
| ELAV1  | 11.616     | White_Blood_Cells    |
| ELAV1  | 11.65479   | Brain_astrocyte      |
| ELAV1  | 11.9083    | Brain_cerebellum     |
| ELAV1  | 12.0649    | Liver                |
| ELAV1  | 13.97004   | Eye                  |
| ELAV1  | 18.44778   | stem_cell            |

© 2009 Landes Bioscience.  
Do not distribute.

*Supplementary file 7*

| RBPs   | Tag freque | Tissue               |
|--------|------------|----------------------|
| ELAV1  | 19.65166   | Prostate             |
| ELAV1  | 21.04416   | Vascular_endothelium |
| ELAV1  | 3.66073    | Placenta             |
| ELAV1  | 3.70734    | Muscle               |
| ELAV1  | 3.95946    | Breast               |
| ELAV1  | 4.50918    | Lung                 |
| ELAV1  | 4.81562    | Heart                |
| ELAV1  | 7.30127    | Spinal_cord          |
| ELAV1  | 8.4896     | Brain_cortex         |
| ELAV1  | 9.4956     | Retina               |
| ELAVL2 | 15.4731    | Brain_cortex         |
| ELAVL2 | 15.6224    | Retina               |
| ELAVL2 | 3.87282    | Vascular_endothelium |
| ELAVL2 | 3.96692    | stem_cell            |
| ELAVL2 | 3.96944    | Brain_cerebellum     |
| ELAVL2 | 4.65669    | Eye                  |
| ELAVL2 | 7.30127    | Spinal_cord          |
| ELAVL3 | 23.8166    | Brain_cerebellum     |
| ELAVL3 | 29.2051    | Spinal_cord          |
| ELAVL3 | 3.37399    | Prostate             |
| ELAVL3 | 39.056     | Retina               |
| ELAVL3 | 41.2616    | Brain_cortex         |
| ELAVL3 | 5.53434    | stem_cell            |
| ELAVL3 | 6.98503    | Eye                  |
| ELAVL3 | 7.71615    | Vascular_endothelium |
| ELAVL4 | 5.8584     | Retina               |
| ELAVL4 | 7.73655    | Brain_cortex         |
| EPRS   | 3.12217    | Prostate             |
| ERAL1  | 11.122     | Muscle               |
| ERAL1  | 3.38745    | Placenta             |
| ERAL1  | 3.87282    | Vascular_endothelium |
| ERAL1  | 3.96944    | Brain_cerebellum     |
| ERAL1  | 4.04752    | White_Blood_Cells    |
| ERAL1  | 4.81562    | Heart                |
| ERAL1  | 6.23641    | stem_cell            |
| ERAL1  | 6.24434    | Prostate             |
| ERAL1  | 7.76986    | Brain_astrocyte      |
| ERAL1  | 8.4896     | Brain_cortex         |
| EWS    | 10.0568    | Retina               |
| EWS    | 11.122     | Muscle               |
| EWS    | 15.5397    | Brain_astrocyte      |
| EWS    | 16.1258    | Colon                |
| EWS    | 20.971     | Breast               |
| EWS    | 21.6371    | Placenta             |
| EWS    | 24.80942   | Vascular_endothelium |
| EWS    | 31.6127    | White_Blood_Cells    |
| EWS    | 32.66403   | stem_cell            |
| EWS    | 3.96944    | Brain_cerebellum     |
| EWS    | 4.50918    | Lung                 |
| EWS    | 8.17962    | Stomach              |
| EWS    | 8.98387    | Brain_cortex         |
| EWS    | 9.31337    | Eye                  |

©2009 Landes Bioscience.  
Do not distribute.

Supplementary file 7

| RBPs   | Tag freque | Tissue               |
|--------|------------|----------------------|
| EWS    | 9.36651    | Prostate             |
| EXOSC7 | 10.1623    | Placenta             |
| EXOSC7 | 15.7821    | Lung                 |
| EXOSC7 | 17.2506    | Thyroid              |
| EXOSC7 | 3.65063    | Spinal_cord          |
| EXOSC7 | 3.70734    | Muscle               |
| EXOSC7 | 47.132     | stem_cell            |
| EXOSC7 | 5.1441     | Vascular_endothelium |
| EXOSC7 | 5.1577     | Brain_cortex         |
| EXOSC7 | 58.4169    | Prostate             |
| EXOSC7 | 6.07128    | White_Blood_Cells    |
| EXOSC7 | 8.6949     | Breast               |
| EXOSC7 | 9.49559    | Retina               |
| EXOSC7 | 9.63124    | Heart                |
| EXOS9  | 3.87282    | Vascular_endothelium |
| EXOS9  | 4.03145    | Colon                |
| EXOS9  | 7.97146    | stem_cell            |
| FBL    | 11.2026    | Placenta             |
| FBL    | 11.6548    | Brain_astrocyte      |
| FBL    | 14.4469    | Heart                |
| FBL    | 17.2506    | Thyroid              |
| FBL    | 21.8123    | Stomach              |
| FBL    | 22.2945    | White_Blood_Cells    |
| FBL    | 22.4176    | Brain_cortex         |
| FBL    | 24.9774    | Prostate             |
| FBL    | 34.9251    | Eye                  |
| FBL    | 3.65063    | Spinal_cord          |
| FBL    | 3.70734    | Muscle               |
| FBL    | 3.96944    | Brain_cerebellum     |
| FBL    | 4.03145    | Colon                |
| FBL    | 48.1257    | Breast               |
| FBL    | 51.441     | Vascular_endothelium |
| FBL    | 6.70455    | Retina               |
| FBL    | 89.0649    | stem_cell            |
| FBL    | 9.01835    | Lung                 |
| FBL    | 9.04868    | Liver                |
| RBM44  | 3.38745    | Placenta             |
| RBM44  | 3.71575    | White_Blood_Cells    |
| RBM44  | 3.72675    | Retina               |
| FMR1   | 11.0687    | stem_cell            |
| FMR1   | 11.2729    | Lung                 |
| FMR1   | 12.0649    | Liver                |
| FMR1   | 14.6025    | Spinal_cord          |
| FMR1   | 18.0519    | Brain_cortex         |
| FMR1   | 18.631     | Placenta             |
| FMR1   | 3.37399    | Prostate             |
| FMR1   | 3.48943    | Vascular_endothelium |
| FMR1   | 3.49516    | Breast               |
| FMR1   | 3.96944    | Brain_cerebellum     |
| FMR1   | 5.45308    | Stomach              |
| FMR1   | 5.8584     | Retina               |
| FMR1   | 6.90024    | Thyroid              |

© 2009 Landes Bioscience.  
Do not distribute.



*Supplementary file 7*

| RBPs  | Tag freque | Tissue               |
|-------|------------|----------------------|
| FMR1  | 7.43149    | White_Blood_Cells    |
| FUBP1 | 10.4855    | Breast               |
| FUBP1 | 11.64171   | Eye                  |
| FUBP1 | 12.0047    | White_Blood_Cells    |
| FUBP1 | 14.59894   | stem_cell            |
| FUBP1 | 17.73273   | Prostate             |
| FUBP1 | 18.63316   | Vascular_endothelium |
| FUBP1 | 3.96944    | Brain_cerebellum     |
| FUBP1 | 6.40502    | Brain_cortex         |
| FUBP1 | 7.07902    | Retina               |
| FUBP1 | 7.76986    | Brain_astrocyte      |
| FUBP2 | 11.134     | Muscle               |
| FUBP2 | 14.6025    | Spinal_cord          |
| FUBP2 | 15.0811    | Liver                |
| FUBP2 | 15.6109    | Prostate             |
| FUBP2 | 19.6701    | Placenta             |
| FUBP2 | 19.8472    | Brain_cerebellum     |
| FUBP2 | 20.1572    | Colon                |
| FUBP2 | 23.2834    | Eye                  |
| FUBP2 | 28.8226    | Brain_cortex         |
| FUBP2 | 30.1705    | Retina               |
| FUBP2 | 34.9644    | Brain_astrocyte      |
| FUBP2 | 37.3567    | White_Blood_Cells    |
| FUBP2 | 4.50918    | Lung                 |
| FUBP2 | 61.9651    | Vascular_endothelium |
| FUBP2 | 65.3134    | Breast               |
| FUBP2 | 7.22343    | Heart                |
| FUBP2 | 73.045     | stem_cell            |
| FUBP2 | 8.6253     | Thyroid              |
| FUBP2 | 89.9759    | Stomach              |
| FUBP3 | 10.9062    | Stomach              |
| FUBP3 | 11.8784    | Breast               |
| FUBP3 | 12.0649    | Liver                |
| FUBP3 | 12.8602    | Vascular_endothelium |
| FUBP3 | 12.8942    | Brain_cortex         |
| FUBP3 | 14.6025    | Spinal_cord          |
| FUBP3 | 15.7821    | Lung                 |
| FUBP3 | 16.2984    | Eye                  |
| FUBP3 | 16.8699    | Prostate             |
| FUBP3 | 22.0184    | Placenta             |
| FUBP3 | 22.4258    | Thyroid              |
| FUBP3 | 23.3096    | Brain_astrocyte      |
| FUBP3 | 24.6885    | Retina               |
| FUBP3 | 26.3617    | stem_cell            |
| FUBP3 | 4.03145    | Colon                |
| FUBP3 | 7.42267    | Muscle               |
| FUBP3 | 9.63124    | Heart                |
| FUBP3 | 9.87898    | White_Blood_Cells    |
| FUS   | 11.122     | Muscle               |
| FUS   | 11.2729    | Lung                 |
| FUS   | 11.7168    | Retina               |
| FUS   | 119.25     | Vascular_endothelium |

©2009 Landes Bioscience.  
Do not distribute.

Supplementary file 7

| RBPs  | Tag freque | Tissue               |
|-------|------------|----------------------|
| FUS   | 16.8547    | Heart                |
| FUS   | 20.9551    | Eye                  |
| FUS   | 22.4176    | Brain_cortex         |
| FUS   | 23.3096    | Brain_astrocyte      |
| FUS   | 23.6042    | Placenta             |
| FUS   | 24.9774    | Prostate             |
| FUS   | 25.5544    | Spinal_cord          |
| FUS   | 3.01623    | Liver                |
| FUS   | 4.03145    | Colon                |
| FUS   | 47.6332    | Brain_cerebellum     |
| FUS   | 63.3513    | Breast               |
| FUS   | 6.90024    | Thyroid              |
| FUS   | 81.7464    | White_Blood_Cells    |
| FUS   | 91.361     | stem_cell            |
| FXR1  | 10.4683    | Vascular_endothelium |
| FXR1  | 12.0754    | Thyroid              |
| FXR1  | 15.193     | Retina               |
| FXR1  | 18.5567    | Muscle               |
| FXR1  | 19.7713    | stem_cell            |
| FXR1  | 21.9038    | Spinal_cord          |
| FXR1  | 3.01623    | Liver                |
| FXR1  | 3.87199    | White_Blood_Cells    |
| FXR1  | 3.88493    | Brain_astrocyte      |
| FXR1  | 4.50918    | Lung                 |
| FXR1  | 4.65669    | Eye                  |
| FXR1  | 4.81562    | Heart                |
| FXR1  | 6.7749     | Placenta             |
| FXR1  | 8.6949     | Breast               |
| FXR1  | 9.36651    | Prostate             |
| FXR1  | 9.60753    | Brain_cortex         |
| FXR2  | 11.134     | Muscle               |
| FXR2  | 12.0943    | Colon                |
| FXR2  | 12.4887    | Prostate             |
| FXR2  | 15.5397    | Brain_astrocyte      |
| FXR2  | 15.8777    | Brain_cerebellum     |
| FXR2  | 3.45012    | Thyroid              |
| FXR2  | 3.79824    | Retina               |
| FXR2  | 4.81562    | Heart                |
| FXR2  | 6.98503    | Eye                  |
| FXR2  | 7.01471    | Vascular_endothelium |
| FXR2  | 7.90319    | White_Blood_Cells    |
| FXR2  | 7.91891    | Breast               |
| FXR2  | 8.90916    | stem_cell            |
| FXR2  | 9.60753    | Brain_cortex         |
| G3BP2 | 11.134     | Muscle               |
| G3BP2 | 11.64171   | Eye                  |
| G3BP2 | 14.6025    | Spinal_cord          |
| G3BP2 | 15.08836   | Breast               |
| G3BP2 | 15.53972   | Brain_astrocyte      |
| G3BP2 | 15.8777    | Brain_cerebellum     |
| G3BP2 | 16.8699    | Prostate             |
| G3BP2 | 17.2506    | Thyroid              |

©2009 Landes Bioscience.  
Do not distribute.

*Supplementary file 7*

| RBPs    | Tag freque | Tissue               |
|---------|------------|----------------------|
| G3BP2   | 18.135     | Brain_cortex         |
| G3BP2   | 18.3665    | White_Blood_Cells    |
| G3BP2   | 20.15725   | Colon                |
| G3BP2   | 20.6354    | Vascular_endothelium |
| G3BP2   | 3.01623    | Liver                |
| G3BP2   | 5.45308    | Stomach              |
| G3BP2   | 55.85055   | stem_cell            |
| G3BP2   | 6.76377    | Lung                 |
| G3BP2   | 8.46862    | Placenta             |
| G3BP2   | 9.63124    | Heart                |
| GRSF1   | 10.9519    | Spinal_cord          |
| GRSF1   | 14.8453    | Muscle               |
| GRSF1   | 16.4976    | stem_cell            |
| GRSF1   | 19.1016    | Brain_cortex         |
| GRSF1   | 3.43755    | Breast               |
| GRSF1   | 3.45012    | Thyroid              |
| GRSF1   | 3.88493    | Brain_astrocyte      |
| GRSF1   | 4.03145    | Colon                |
| GRSF1   | 7.74563    | Vascular_endothelium |
| GRSF1   | 7.90319    | White_Blood_Cells    |
| GRSF1   | 7.93887    | Brain_cerebellum     |
| GRSF1   | 8.36622    | Prostate             |
| GRSF1   | 9.31337    | Eye                  |
| HNRPH3  | 11.12601   | Muscle               |
| HNRPH3  | 12.0943    | Colon                |
| HNRPH3  | 12.40191   | Retina               |
| HNRPH3  | 15.53973   | Brain_astrocyte      |
| HNRPH3  | 15.78211   | Lung                 |
| HNRPH3  | 15.8777    | Brain_cerebellum     |
| HNRPH3  | 17.25062   | Thyroid              |
| HNRPH3  | 18.25317   | Spinal_cord          |
| HNRPH3  | 18.34855   | Brain_cortex         |
| HNRPH3  | 23.71212   | Placenta             |
| HNRPH3  | 25.61177   | Eye                  |
| HNRPH3  | 29.61041   | Prostate             |
| HNRPH3  | 32.71852   | Stomach              |
| HNRPH3  | 34.4039    | White_Blood_Cells    |
| HNRPH3  | 39.9699    | Vascular_endothelium |
| HNRPH3  | 47.4511    | stem_cell            |
| HNRPH3  | 59.3025    | Breast               |
| HNRPH3  | 6.03246    | Liver                |
| HNRPH3  | 9.63124    | Heart                |
| HNRPUL1 | 10.122     | Prostate             |
| HNRPUL1 | 13.1809    | stem_cell            |
| HNRPUL1 | 13.6696    | Retina               |
| HNRPUL1 | 13.9577    | Vascular_endothelium |
| HNRPUL1 | 21.8123    | Stomach              |
| HNRPUL1 | 3.49516    | Breast               |
| HNRPUL1 | 3.88493    | Brain_astrocyte      |
| HNRPUL1 | 4.65669    | Eye                  |
| HNRPUL1 | 5.17518    | Thyroid              |
| HNRPUL1 | 5.90104    | Placenta             |

©2009 Landes Bioscience.  
Do not distribute.

*Supplementary file 7*

| RBPs    | Tag freque | Tissue               |
|---------|------------|----------------------|
| HNRPUL1 | 6.3672     | Brain_cortex         |
| HNRPUL1 | 6.76376    | Lung                 |
| HNRPUL1 | 7.22343    | Heart                |
| HNRPUL1 | 7.30127    | Spinal_cord          |
| HNRPUL1 | 7.43149    | White_Blood_Cells    |
| HNRPLL  | 10.37026   | Breast               |
| HNRPLL  | 10.98221   | Placenta             |
| HNRPLL  | 11.27294   | Lung                 |
| HNRPLL  | 11.61845   | Vascular_endothelium |
| HNRPLL  | 14.3369    | Retina               |
| HNRPLL  | 16.35924   | Stomach              |
| HNRPLL  | 18.97564   | Thyroid              |
| HNRPLL  | 19.68645   | stem_cell            |
| HNRPLL  | 3.12217    | Prostate             |
| HNRPLL  | 3.65063    | Spinal_cord          |
| HNRPLL  | 3.71133    | Muscle               |
| HNRPLL  | 3.96944    | Brain_cerebellum     |
| HNRPLL  | 7.2801     | Brain_cortex         |
| HNRPLL  | 7.67486    | White_Blood_Cells    |
| HNRPLL  | 7.76986    | Brain_astrocyte      |
| HNRPA0  | 15.75416   | Retina               |
| HNRPA0  | 18.0367    | Lung                 |
| HNRPA0  | 18.25313   | Spinal_cord          |
| HNRPA0  | 18.62678   | Eye                  |
| HNRPA0  | 18.97566   | Thyroid              |
| HNRPA0  | 19.42466   | Brain_astrocyte      |
| HNRPA0  | 19.92293   | Brain_cortex         |
| HNRPA0  | 21.81228   | Stomach              |
| HNRPA0  | 23.11433   | Prostate             |
| HNRPA0  | 3.71133    | Muscle               |
| HNRPA0  | 45.13044   | Placenta             |
| HNRPA0  | 54.6362    | White_Blood_Cells    |
| HNRPA0  | 71.21174   | stem_cell            |
| HNRPA0  | 7.93888    | Brain_cerebellum     |
| HNRPA0  | 91.05719   | Breast               |
| HNRPA0  | 93.76325   | Vascular_endothelium |
| HNRPA0  | 9.63124    | Heart                |
| HNRPCL1 | 3.50736    | Vascular_endothelium |
| HNRPCL1 | 3.62053    | stem_cell            |
| HNRPCL1 | 3.88493    | Brain_astrocyte      |
| HNRPCL1 | 4.65669    | Eye                  |
| HNRPCL1 | 6.24434    | Prostate             |
| HNRPCL1 | 6.99032    | Breast               |
| HNRPD   | 116.054    | Placenta             |
| HNRPD   | 14.8294    | Muscle               |
| HNRPD   | 224.075    | stem_cell            |
| HNRPD   | 23.3096    | Brain_astrocyte      |
| HNRPD   | 23.8166    | Brain_cerebellum     |
| HNRPD   | 25.6118    | Eye                  |
| HNRPD   | 25.7885    | Brain_cortex         |
| HNRPD   | 26.4859    | Heart                |
| HNRPD   | 29.326     | Thyroid              |

©2009 Landes Bioscience.  
Do not distribute.

*Supplementary file 7*

| RBPs   | Tag freque | Tissue               |
|--------|------------|----------------------|
| HNRPD  | 30.1623    | Liver                |
| HNRPD  | 30.9379    | Breast               |
| HNRPD  | 31.2217    | Prostate             |
| HNRPD  | 34.8554    | Vascular_endothelium |
| HNRPD  | 46.4639    | White_Blood_Cells    |
| HNRPD  | 48.82      | Retina               |
| HNRPD  | 49.6009    | Lung                 |
| HNRPD  | 65.7114    | Spinal_cord          |
| HNRPD  | 95.429     | Stomach              |
| HNRPDL | 119.616    | Prostate             |
| HNRPDL | 126.257    | Lung                 |
| HNRPDL | 131.529    | stem_cell            |
| HNRPDL | 144.333    | Retina               |
| HNRPDL | 146.025    | Spinal_cord          |
| HNRPDL | 179.695    | Breast               |
| HNRPDL | 18.6267    | Eye                  |
| HNRPDL | 27.1945    | Brain_astrocyte      |
| HNRPDL | 27.786     | Brain_cerebellum     |
| HNRPDL | 29.6907    | Muscle               |
| HNRPDL | 38.525     | Heart                |
| HNRPDL | 40.8981    | Stomach              |
| HNRPDL | 54.013     | Vascular_endothelium |
| HNRPDL | 73.5678    | White_Blood_Cells    |
| HNRPDL | 78.4219    | Liver                |
| HNRPDL | 79.3528    | Thyroid              |
| HNRPDL | 8.06289    | Colon                |
| HNRPDL | 93.1548    | Placenta             |
| HNRPDL | 97.9962    | Brain_cortex         |
| HNRPF  | 11.6417    | Eye                  |
| HNRPF  | 16.1258    | Colon                |
| HNRPF  | 19.8472    | Brain_cerebellum     |
| HNRPF  | 20.5764    | Vascular_endothelium |
| HNRPF  | 20.7007    | Thyroid              |
| HNRPF  | 22.0086    | White_Blood_Cells    |
| HNRPF  | 24.1298    | Liver                |
| HNRPF  | 24.4661    | Breast               |
| HNRPF  | 24.8005    | Lung                 |
| HNRPF  | 26.8862    | Placenta             |
| HNRPF  | 34.9644    | Brain_astrocyte      |
| HNRPF  | 37.466     | Prostate             |
| HNRPF  | 4.81562    | Heart                |
| HNRPF  | 60.8777    | stem_cell            |
| HNRPF  | 6.70455    | Retina               |
| HNRPF  | 7.30127    | Spinal_cord          |
| HNRPF  | 7.42267    | Muscle               |
| HNRPF  | 8.17962    | Stomach              |
| HNRPG  | 10.3154    | Brain_cortex         |
| HNRPG  | 11.2026    | Placenta             |
| HNRPG  | 11.27294   | Lung                 |
| HNRPG  | 11.39472   | Retina               |
| HNRPG  | 12.19006   | Breast               |
| HNRPG  | 18.97568   | Thyroid              |

©2009 Landes Bioscience.  
Do not distribute.

*Supplementary file 7*

| RBPs   | Tag freque | Tissue               |
|--------|------------|----------------------|
| HNRPG  | 19.42463   | Brain_astrocyte      |
| HNRPG  | 20.83395   | Prostate             |
| HNRPG  | 26.37884   | Vascular_endothelium |
| HNRPG  | 30.42235   | White_Blood_Cells    |
| HNRPG  | 3.71133    | Muscle               |
| HNRPG  | 3.96944    | Brain_cerebellum     |
| HNRPG  | 4.03145    | Colon                |
| HNRPG  | 7.30127    | Spinal_cord          |
| HNRPG  | 84.29059   | stem_cell            |
| HNRPG  | 9.31337    | Eye                  |
| HNRPGT | 3.65063    | Spinal_cord          |
| HNRPK  | 110.135    | Breast               |
| HNRPK  | 11.9083    | Brain_cerebellum     |
| HNRPK  | 12.0943    | Colon                |
| HNRPK  | 128.602    | Vascular_endothelium |
| HNRPK  | 12.8942    | Brain_cortex         |
| HNRPK  | 13.8005    | Thyroid              |
| HNRPK  | 165.096    | stem_cell            |
| HNRPK  | 24.1298    | Liver                |
| HNRPK  | 25.5544    | Spinal_cord          |
| HNRPK  | 27.1945    | Brain_astrocyte      |
| HNRPK  | 29.3096    | Lung                 |
| HNRPK  | 30.3659    | Prostate             |
| HNRPK  | 31.4722    | Placenta             |
| HNRPK  | 40.9328    | Heart                |
| HNRPK  | 42.9616    | Retina               |
| HNRPK  | 5.45308    | Stomach              |
| HNRPK  | 6.98503    | Eye                  |
| HNRPK  | 88.1591    | White_Blood_Cells    |
| HNRPL  | 151.58     | stem_cell            |
| HNRPL  | 29.3096    | Lung                 |
| HNRPL  | 29.326     | Thyroid              |
| HNRPL  | 29.6587    | Muscle               |
| HNRPL  | 33.1785    | Liver                |
| HNRPL  | 36.5063    | Spinal_cord          |
| HNRPL  | 38.525     | Heart                |
| HNRPL  | 40.3145    | Colon                |
| HNRPL  | 43.8404    | Brain_cortex         |
| HNRPL  | 44.2385    | Eye                  |
| HNRPL  | 46.9318    | Retina               |
| HNRPL  | 47.6332    | Brain_cerebellum     |
| HNRPL  | 58.2739    | Brain_astrocyte      |
| HNRPL  | 62.8097    | Vascular_endothelium |
| HNRPL  | 81.7464    | White_Blood_Cells    |
| HNRPL  | 89.9759    | Stomach              |
| HNRPL  | 93.6651    | Prostate             |
| HNRPL  | 94.4166    | Placenta             |
| HNRPL  | 95.6439    | Breast               |
| HNRPM  | 12.0391    | Heart                |
| HNRPM  | 14.6025    | Spinal_cord          |
| HNRPM  | 14.8453    | Muscle               |
| HNRPM  | 15.193     | Retina               |

©2009 Landes Bioscience.  
Do not distribute.

*Supplementary file 7*

| RBPs    | Tag freque | Tissue               |
|---------|------------|----------------------|
| HNRPM   | 16.8699    | Prostate             |
| HNRPM   | 20.1572    | Colon                |
| HNRPM   | 20.1647    | Placenta             |
| HNRPM   | 22.5459    | Lung                 |
| HNRPM   | 24.4661    | Breast               |
| HNRPM   | 24.5389    | Stomach              |
| HNRPM   | 25.6201    | Brain_cortex         |
| HNRPM   | 25.8759    | Thyroid              |
| HNRPM   | 3.01623    | Liver                |
| HNRPM   | 32.0125    | White_Blood_Cells    |
| HNRPM   | 41.8731    | Vascular_endothelium |
| HNRPM   | 46.5669    | Eye                  |
| HNRPM   | 46.6191    | Brain_astrocyte      |
| HNRPM   | 66.2274    | stem_cell            |
| HNRPM   | 7.93887    | Brain_cerebellum     |
| SYNCRIP | 12.0754    | Thyroid              |
| SYNCRIP | 13.5498    | Placenta             |
| SYNCRIP | 19.8346    | stem_cell            |
| SYNCRIP | 24.4661    | Breast               |
| SYNCRIP | 3.01623    | Liver                |
| SYNCRIP | 3.35227    | Retina               |
| SYNCRIP | 3.93229    | White_Blood_Cells    |
| SYNCRIP | 4.50918    | Lung                 |
| SYNCRIP | 7.30127    | Spinal_cord          |
| SYNCRIP | 8.36622    | Prostate             |
| HNRPR   | 15.4913    | Vascular_endothelium |
| HNRPR   | 16.8547    | Heart                |
| HNRPR   | 18.6267    | Eye                  |
| HNRPR   | 19.0858    | Stomach              |
| HNRPR   | 21.1136    | Liver                |
| HNRPR   | 22.3099    | Prostate             |
| HNRPR   | 25.8759    | Thyroid              |
| HNRPR   | 31.5642    | Lung                 |
| HNRPR   | 36.5063    | Spinal_cord          |
| HNRPR   | 3.70734    | Muscle               |
| HNRPR   | 38.6827    | Brain_cortex         |
| HNRPR   | 39.056     | Retina               |
| HNRPR   | 42.5919    | White_Blood_Cells    |
| HNRPR   | 45.7305    | Placenta             |
| HNRPR   | 48.1257    | Breast               |
| HNRPR   | 62.7225    | stem_cell            |
| HNRPR   | 7.76986    | Brain_astrocyte      |
| HNRPR   | 7.93887    | Brain_cerebellum     |
| HNRPU   | 10.9062    | Stomach              |
| HNRPU   | 11.65479   | Brain_astrocyte      |
| HNRPU   | 12.03905   | Heart                |
| HNRPU   | 13.97006   | Eye                  |
| HNRPU   | 15.7697    | Brain_cortex         |
| HNRPU   | 17.0921    | Retina               |
| HNRPU   | 18.25014   | Placenta             |
| HNRPU   | 18.25313   | Spinal_cord          |
| HNRPU   | 18.97566   | Thyroid              |

© 2009 Landes Bioscience.  
Do not distribute.

*Supplementary file 7*

| RBPs    | Tag freque | Tissue               |
|---------|------------|----------------------|
| HNRPU   | 22.6107    | Prostate             |
| HNRPU   | 23.37715   | White_Blood_Cells    |
| HNRPU   | 24.80049   | Lung                 |
| HNRPU   | 4.03145    | Colon                |
| HNRPU   | 42.1611    | Breast               |
| HNRPU   | 43.725     | Vascular_endothelium |
| HNRPU   | 6.03245    | Liver                |
| HNRPU   | 7.41468    | Muscle               |
| HNRPU   | 78.8234    | stem_cell            |
| HNRPU   | 7.93887    | Brain_cerebellum     |
| HTF9C   | 12.78692   | Breast               |
| HTF9C   | 13.85233   | Brain_cortex         |
| HTF9C   | 14.83735   | Muscle               |
| HTF9C   | 3.12217    | Prostate             |
| HTF9C   | 3.88493    | Brain_astrocyte      |
| HTF9C   | 3.9056     | Retina               |
| HTF9C   | 4.65668    | Eye                  |
| HTF9C   | 5.45308    | Stomach              |
| HTF9C   | 7.04818    | Placenta             |
| HTF9C   | 7.30126    | Spinal_cord          |
| HTF9C   | 7.74564    | Vascular_endothelium |
| HTF9C   | 7.92219    | White_Blood_Cells    |
| HTF9C   | 8.0629     | Colon                |
| HTF9C   | 9.03506    | stem_cell            |
| HTATSF1 | 10.9062    | Stomach              |
| HTATSF1 | 13.8005    | Thyroid              |
| HTATSF1 | 14.8453    | Muscle               |
| HTATSF1 | 15.4731    | Brain_cortex         |
| HTATSF1 | 19.6701    | Placenta             |
| HTATSF1 | 20.8903    | Retina               |
| HTATSF1 | 23.9821    | stem_cell            |
| HTATSF1 | 24.8005    | Lung                 |
| HTATSF1 | 3.65063    | Spinal_cord          |
| HTATSF1 | 4.00156    | White_Blood_Cells    |
| HTATSF1 | 4.65669    | Eye                  |
| HTATSF1 | 5.7966     | Breast               |
| HTATSF1 | 6.03245    | Liver                |
| HTATSF1 | 6.74798    | Prostate             |
| HTATSF1 | 7.71615    | Vascular_endothelium |
| IF2B    | 11.6417    | Eye                  |
| IF2B    | 13.8005    | Thyroid              |
| IF2B    | 15.8064    | White_Blood_Cells    |
| IF2B    | 16.8547    | Heart                |
| IF2B    | 19.2151    | Brain_cortex         |
| IGF2BP2 | 10.4683    | Vascular_endothelium |
| IGF2BP2 | 22.0184    | Placenta             |
| IGF2BP2 | 29.992     | Stomach              |
| IGF2BP2 | 3.01623    | Liver                |
| IGF2BP2 | 3.20251    | Brain_cortex         |
| IGF2BP2 | 3.45012    | Thyroid              |
| IGF2BP2 | 3.49516    | Breast               |
| IF2B    | 23.7567    | Breast               |

©2009 Landes Bioscience.  
Do not distribute.



*Supplementary file 7*

| RBPs    | Tag freque | Tissue               |
|---------|------------|----------------------|
| IGF2BP2 | 3.9056     | Retina               |
| IGF2BP2 | 40.8537    | stem_cell            |
| IGF2BP2 | 4.65669    | Eye                  |
| IF2B    | 25.9793    | Muscle               |
| IGF2BP2 | 7.76986    | Brain_astrocyte      |
| IGF2BP2 | 7.90319    | White_Blood_Cells    |
| IF2B    | 28.0995    | Prostate             |
| IGF2BP2 | 8.36622    | Prostate             |
| IF2B    | 30.7436    | stem_cell            |
| IF2B    | 32.2516    | Colon                |
| IF2B    | 38.8493    | Brain_astrocyte      |
| IF2B    | 4.50918    | Lung                 |
| IF2B    | 46.4738    | Vascular_endothelium |
| IF2B    | 5.45308    | Stomach              |
| IF2B    | 6.03245    | Liver                |
| IF2B    | 6.7749     | Placenta             |
| IF2B    | 7.30127    | Spinal_cord          |
| EIF3S4  | 113.33     | White_Blood_Cells    |
| EIF3S4  | 11.6185    | Vascular_endothelium |
| EIF3S4  | 18.2532    | Spinal_cord          |
| EIF3S4  | 22.3099    | Prostate             |
| EIF3S4  | 22.4176    | Brain_cortex         |
| EIF3S4  | 23.2834    | Eye                  |
| EIF3S4  | 33.402     | Muscle               |
| EIF3S4  | 35.6351    | Breast               |
| EIF3S4  | 3.96944    | Brain_cerebellum     |
| EIF3S4  | 42.5145    | stem_cell            |
| EIF3S4  | 6.76376    | Lung                 |
| EIF3S4  | 7.76986    | Brain_astrocyte      |
| EIF3S4  | 7.86805    | Placenta             |
| EIF3S4  | 8.06289    | Colon                |
| EIF3S4  | 9.04868    | Liver                |
| EIF3S4  | 9.49559    | Retina               |
| EIF3S9  | 10.9062    | Stomach              |
| EIF3S9  | 11.616     | White_Blood_Cells    |
| EIF3S9  | 11.9083    | Brain_cerebellum     |
| EIF3S9  | 126.536    | stem_cell            |
| EIF3S9  | 14.6025    | Spinal_cord          |
| EIF3S9  | 14.8453    | Muscle               |
| EIF3S9  | 19.4246    | Brain_astrocyte      |
| EIF3S9  | 21.6703    | Heart                |
| EIF3S9  | 24.1298    | Liver                |
| EIF3S9  | 24.1508    | Thyroid              |
| EIF3S9  | 25.0987    | Prostate             |
| EIF3S9  | 25.7885    | Brain_cortex         |
| EIF3S9  | 27.0551    | Lung                 |
| EIF3S9  | 27.9154    | Vascular_endothelium |
| EIF3S9  | 4.03145    | Colon                |
| EIF3S9  | 45.5788    | Retina               |
| EIF3S9  | 4.65669    | Eye                  |
| EIF3S9  | 57.0434    | Placenta             |
| EIF3S9  | 72.1885    | Breast               |

©2009 Landes Bioscience.  
Do not distribute.

*Supplementary file 7*

| RBPs    | Tag freque | Tissue               |
|---------|------------|----------------------|
| EIF4H   | 12.0649    | Liver                |
| EIF4H   | 14.8453    | Muscle               |
| EIF4H   | 156.727    | stem_cell            |
| EIF4H   | 16.2984    | Eye                  |
| EIF4H   | 17.5752    | Retina               |
| EIF4H   | 24.1887    | Colon                |
| EIF4H   | 28.0995    | Prostate             |
| EIF4H   | 32.7761    | Thyroid              |
| EIF4H   | 33.7094    | Heart                |
| EIF4H   | 35.0736    | Vascular_endothelium |
| EIF4H   | 35.7249    | Brain_cerebellum     |
| EIF4H   | 36.5063    | Spinal_cord          |
| EIF4H   | 38.4301    | Brain_cortex         |
| EIF4H   | 40.8981    | Stomach              |
| EIF4H   | 45.0918    | Lung                 |
| EIF4H   | 65.3134    | Breast               |
| EIF4H   | 66.0438    | Brain_astrocyte      |
| EIF4H   | 67.2156    | Placenta             |
| EIF4H   | 88.1591    | White_Blood_Cells    |
| IGF2BP1 | 12.6611    | stem_cell            |
| IGF2BP1 | 3.65063    | Spinal_cord          |
| IGF2BP3 | 3.43755    | Breast               |
| IGF2BP3 | 3.48943    | Vascular_endothelium |
| IGF2BP3 | 3.71575    | White_Blood_Cells    |
| IGF2BP3 | 3.88493    | Brain_astrocyte      |
| IGF2BP3 | 43.4969    | stem_cell            |
| IGF2BP3 | 54.1992    | Placenta             |
| IGF2BP3 | 8.36622    | Prostate             |
| ILF3    | 10.9062    | Stomach              |
| ILF3    | 11.64172   | Eye                  |
| ILF3    | 12.18638   | Brain_cortex         |
| ILF3    | 13.7691    | Placenta             |
| ILF3    | 13.85504   | Retina               |
| ILF3    | 19.36412   | Vascular_endothelium |
| ILF3    | 20.18804   | Prostate             |
| ILF3    | 24.8005    | Lung                 |
| ILF3    | 3.01623    | Liver                |
| ILF3    | 3.45012    | Thyroid              |
| ILF3    | 35.97332   | Breast               |
| ILF3    | 3.71133    | Muscle               |
| ILF3    | 3.88493    | Brain_astrocyte      |
| ILF3    | 3.96944    | Brain_cerebellum     |
| ILF3    | 4.03145    | Colon                |
| ILF3    | 92.8587    | stem_cell            |
| ILF3    | 9.74476    | White_Blood_Cells    |
| IREB1   | 12.0649    | Liver                |
| IREB1   | 13.4431    | Placenta             |
| IREB1   | 14.8294    | Muscle               |
| IREB1   | 17.4471    | Vascular_endothelium |
| IREB1   | 18.6267    | Eye                  |
| IREB1   | 19.7713    | stem_cell            |
| IREB1   | 20.2439    | Prostate             |

Landes Bioscience.  
Do not distribute.

Supplementary file 7

| RBPs    | Tag freque | Tissue               |
|---------|------------|----------------------|
| IREB1   | 4.03145    | Colon                |
| IREB1   | 4.50918    | Lung                 |
| IREB1   | 5.1577     | Brain_cortex         |
| IREB1   | 5.7966     | Breast               |
| IREB1   | 7.22343    | Heart                |
| IREB1   | 7.30127    | Spinal_cord          |
| IREB1   | 7.76986    | Brain_astrocyte      |
| IREB1   | 7.8112     | Retina               |
| JOSD2   | 10.9519    | Spinal_cord          |
| JOSD2   | 11.2729    | Lung                 |
| JOSD2   | 13.4431    | Placenta             |
| JOSD2   | 14.0294    | Vascular_endothelium |
| JOSD2   | 14.8568    | Brain_cortex         |
| JOSD2   | 18.2138    | White_Blood_Cells    |
| JOSD2   | 18.9757    | Thyroid              |
| JOSD2   | 19.5212    | Prostate             |
| JOSD2   | 20.2926    | stem_cell            |
| JOSD2   | 3.71133    | Muscle               |
| JOSD2   | 3.88493    | Brain_astrocyte      |
| JOSD2   | 3.95946    | Breast               |
| JOSD2   | 4.03145    | Colon                |
| JOSD2   | 6.03245    | Liver                |
| JOSD2   | 7.22343    | Heart                |
| JOSD2   | 7.59648    | Retina               |
| JOSD2   | 7.93887    | Brain_cerebellum     |
| KHDRBS3 | 10.122     | Prostate             |
| KHDRBS3 | 10.4855    | Breast               |
| KHDRBS3 | 10.5146    | stem_cell            |
| KHDRBS3 | 12.8942    | Brain_cortex         |
| KHDRBS3 | 3.70734    | Muscle               |
| KHDRBS3 | 3.96944    | Brain_cerebellum     |
| KHDRBS3 | 4.65669    | Eye                  |
| KHDRBS3 | 6.03245    | Liver                |
| KHDRBS3 | 6.70455    | Retina               |
| KHDRBS3 | 7.71615    | Vascular_endothelium |
| KHDRBS3 | 8.17962    | Stomach              |
| KHDRBS2 | 12.0649    | Liver                |
| KRR1    | 10.4683    | Vascular_endothelium |
| KRR1    | 3.65063    | Spinal_cord          |
| KRR1    | 3.71133    | Muscle               |
| KRR1    | 3.71575    | White_Blood_Cells    |
| KRR1    | 6.90024    | Thyroid              |
| KRR1    | 6.99032    | Breast               |
| KRR1    | 7.52499    | Retina               |
| KRR1    | 7.71709    | stem_cell            |
| KRR1    | 7.93888    | Brain_cerebellum     |
| KRR1    | 9.36651    | Prostate             |
| LA      | 10.1623    | Placenta             |
| LA      | 10.4855    | Breast               |
| LA      | 13.496     | Prostate             |
| LA      | 3.01623    | Liver                |
| LA      | 35.2339    | stem_cell            |

©2009 Landes Bioscience.  
Do not distribute.

Supplementary file 7

| RBPs   | Tag freque | Tissue               |
|--------|------------|----------------------|
| LA     | 3.65063    | Spinal_cord          |
| LA     | 3.71133    | Muscle               |
| LA     | 3.87282    | Vascular_endothelium |
| LA     | 3.88493    | Brain_astrocyte      |
| LA     | 4.81562    | Heart                |
| LA     | 5.8584     | Retina               |
| LA     | 6.40502    | Brain_cortex         |
| LA     | 8.00312    | White_Blood_Cells    |
| LA     | 8.17962    | Stomach              |
| LA     | 8.6253     | Thyroid              |
| LARP4  | 10.13291   | stem_cell            |
| LARP4  | 12.06491   | Liver                |
| LARP4  | 16.28208   | Breast               |
| LARP4  | 3.37399    | Prostate             |
| LARP4  | 3.45012    | Thyroid              |
| LARP4  | 3.65063    | Spinal_cord          |
| LARP4  | 3.66073    | Placenta             |
| LARP4  | 3.88493    | Brain_astrocyte      |
| LARP4  | 4.65669    | Eye                  |
| LARP4  | 5.45308    | Stomach              |
| LARP4  | 6.76377    | Lung                 |
| LARP4  | 6.99679    | Vascular_endothelium |
| LARP4  | 7.15051    | Retina               |
| LARP4  | 7.41468    | Muscle               |
| LARP4  | 9.82804    | White_Blood_Cells    |
| LARP5  | 3.95946    | Breast               |
| LARP7  | 11.9149    | stem_cell            |
| LARP7  | 16.1901    | White_Blood_Cells    |
| LARP7  | 4.50918    | Lung                 |
| LARP7  | 5.7966     | Breast               |
| LKAP   | 12.7344    | Brain_cortex         |
| LKAP   | 18.007     | White_Blood_Cells    |
| LKAP   | 3.12217    | Prostate             |
| LKAP   | 3.45012    | Thyroid              |
| LKAP   | 3.49516    | Breast               |
| LKAP   | 3.70734    | Muscle               |
| LKAP   | 3.87282    | Vascular_endothelium |
| LKAP   | 3.89573    | stem_cell            |
| LKAP   | 3.96944    | Brain_cerebellum     |
| LKAP   | 4.50918    | Lung                 |
| LKAP   | 6.98503    | Eye                  |
| LKAP   | 7.30127    | Spinal_cord          |
| ADAD2  | 6.40502    | Brain_cortex         |
| LRPPRC | 11.127     | Prostate             |
| LRPPRC | 11.16347   | Retina               |
| LRPPRC | 11.64172   | Eye                  |
| LRPPRC | 13.41787   | White_Blood_Cells    |
| LRPPRC | 13.80046   | Thyroid              |
| LRPPRC | 15.7697    | Brain_cortex         |
| LRPPRC | 19.94362   | Placenta             |
| LRPPRC | 20.97096   | Breast               |
| LRPPRC | 39.0256    | stem_cell            |

©2009 Landes Bioscience.  
Do not distribute.

Supplementary file 7

| RBPs     | Tag freque | Tissue               |
|----------|------------|----------------------|
| LRPPRC   | 3.96944    | Brain_cerebellum     |
| LRPPRC   | 5.1441     | Vascular_endothelium |
| LRPPRC   | 5.45308    | Stomach              |
| LRPPRC   | 7.22343    | Heart                |
| LRPPRC   | 7.30127    | Spinal_cord          |
| LRPPRC   | 7.42267    | Muscle               |
| LRPPRC   | 7.76986    | Brain_astrocyte      |
| LRPPRC   | 9.01836    | Lung                 |
| LRPPRC   | 9.04868    | Liver                |
| LSM5     | 10.3126    | Breast               |
| LSM5     | 10.4683    | Vascular_endothelium |
| LSM5     | 10.9519    | Spinal_cord          |
| LSM5     | 11.6548    | Brain_astrocyte      |
| LSM5     | 12.0391    | Heart                |
| LSM5     | 12.0649    | Liver                |
| LSM5     | 13.2938    | Retina               |
| LSM5     | 13.7691    | Placenta             |
| LSM5     | 14.8294    | Muscle               |
| LSM5     | 15.7821    | Lung                 |
| LSM5     | 17.2506    | Thyroid              |
| LSM5     | 22.2541    | Prostate             |
| LSM5     | 32.7185    | Stomach              |
| LSM5     | 37.86953   | stem_cell            |
| LSM5     | 4.70125    | Brain_cortex         |
| LSM5     | 9.31337    | Eye                  |
| LSM5     | 9.87898    | White_Blood_Cells    |
| MOV10L1  | 10.4683    | Vascular_endothelium |
| MATR3    | 3.65063    | Spinal_cord          |
| MATR3    | 5.79284    | stem_cell            |
| MATR3    | 7.59648    | Retina               |
| RNMT     | 10.1623    | Placenta             |
| RNMT     | 15.193     | Retina               |
| RNMT     | 3.37399    | Prostate             |
| RNMT     | 3.95946    | Breast               |
| RNMT     | 3.96944    | Brain_cerebellum     |
| RNMT     | 4.03145    | Colon                |
| RNMT     | 4.65669    | Eye                  |
| RNMT     | 4.81562    | Heart                |
| RNMT     | 7.30127    | Spinal_cord          |
| RNMT     | 7.74398    | White_Blood_Cells    |
| RNMT     | 7.76986    | Brain_astrocyte      |
| RNMT     | 7.90852    | stem_cell            |
| MGC10433 | 11.2729    | Lung                 |
| MGC10433 | 14.8453    | Muscle               |
| MGC10433 | 15.4913    | Vascular_endothelium |
| MGC10433 | 18.4478    | stem_cell            |
| MGC10433 | 3.96944    | Brain_cerebellum     |
| MGC10433 | 4.03145    | Colon                |
| MGC10433 | 4.81562    | Heart                |
| MGC10433 | 5.1577     | Brain_cortex         |
| MGC10433 | 6.70455    | Retina               |
| MGC10433 | 7.90319    | White_Blood_Cells    |

© 2009 Landes Bioscience.  
not distribute.

Supplementary file 7

| RBPs     | Tag freque | Tissue               |
|----------|------------|----------------------|
| MGC10433 | 7.91891    | Breast               |
| MGC10433 | 9.31337    | Eye                  |
| MGC10433 | 9.36651    | Prostate             |
| MGC10433 | 9.83507    | Placenta             |
| MGC27016 | 11.2729    | Lung                 |
| MGC27016 | 16.1901    | White_Blood_Cells    |
| MGC27016 | 17.8511    | stem_cell            |
| MGC27016 | 21.0441    | Vascular_endothelium |
| MGC27016 | 3.38745    | Placenta             |
| MGC27016 | 3.79824    | Retina               |
| MGC27016 | 3.96944    | Brain_cerebellum     |
| MGC27016 | 6.40502    | Brain_cortex         |
| MGC27016 | 6.74798    | Prostate             |
| MGC27016 | 6.99032    | Breast               |
| MGC27016 | 7.30127    | Spinal_cord          |
| MGC27016 | 8.6253     | Thyroid              |
| MINT     | 10.2882    | Vascular_endothelium |
| MINT     | 11.8784    | Breast               |
| MINT     | 3.20251    | Brain_cortex         |
| MINT     | 3.88493    | Brain_astrocyte      |
| MINT     | 3.93403    | Placenta             |
| MINT     | 44.0796    | White_Blood_Cells    |
| MINT     | 6.60635    | stem_cell            |
| MKI67IP  | 11.6548    | Brain_astrocyte      |
| MKI67IP  | 34.6713    | stem_cell            |
| MKI67IP  | 3.65063    | Spinal_cord          |
| MKI67IP  | 3.71133    | Muscle               |
| MKI67IP  | 3.79824    | Retina               |
| MKI67IP  | 3.96944    | Brain_cerebellum     |
| MKI67IP  | 5.1577     | Brain_cortex         |
| MKI67IP  | 5.17518    | Thyroid              |
| MKI67IP  | 5.45308    | Stomach              |
| MKI67IP  | 6.97885    | Vascular_endothelium |
| MKI67IP  | 6.98503    | Eye                  |
| MKI67IP  | 7.45462    | Breast               |
| MKI67IP  | 7.80428    | White_Blood_Cells    |
| MKI67IP  | 9.01835    | Lung                 |
| MKI67IP  | 9.04868    | Liver                |
| MKI67IP  | 9.36651    | Prostate             |
| MS11     | 13.9577    | Vascular_endothelium |
| MS11     | 18.6267    | Eye                  |
| MS11     | 19.7713    | stem_cell            |
| MS11     | 20.1136    | Retina               |
| MS11     | 3.20251    | Brain_cortex         |
| MS11     | 3.65063    | Spinal_cord          |
| MS11     | 6.99032    | Breast               |
| MS12H    | 3.96944    | Brain_cerebellum     |
| MTHFSD   | 10.122     | Prostate             |
| MTHFSD   | 11.134     | Muscle               |
| MTHFSD   | 11.8784    | Breast               |
| MTHFSD   | 13.4091    | Retina               |
| MTHFSD   | 16.8547    | Heart                |

© 2009 Landes Bioscience.  
Do not distribute.

*Supplementary file 7*

| RBPs     | Tag freque | Tissue               |
|----------|------------|----------------------|
| MTHFSD   | 18.0367    | Lung                 |
| MTHFSD   | 18.2532    | Spinal_cord          |
| MTHFSD   | 18.5787    | White_Blood_Cells    |
| MTHFSD   | 43.827     | stem_cell            |
| MTHFSD   | 5.08117    | Placenta             |
| MTHFSD   | 5.45308    | Stomach              |
| MTHFSD   | 7.73655    | Brain_cortex         |
| MTHFSD   | 7.74563    | Vascular_endothelium |
| MTHFSD   | 8.6253     | Thyroid              |
| MTHFSD   | 9.04868    | Liver                |
| MYEF2    | 10.98462   | Retina               |
| MYEF2    | 14.73846   | stem_cell            |
| MYEF2    | 17.139     | Brain_cortex         |
| MYEF2    | 3.70734    | Muscle               |
| MYEF2    | 3.96944    | Brain_cerebellum     |
| MYEF2    | 4.65669    | Eye                  |
| MYEF2    | 7.30127    | Spinal_cord          |
| MYEF2    | 7.71615    | Vascular_endothelium |
| MYEF2    | 9.61833    | Prostate             |
| SLC4A1AP | 10.3504    | Thyroid              |
| SLC4A1AP | 11.8021    | Placenta             |
| SLC4A1AP | 12.0649    | Liver                |
| SLC4A1AP | 15.8777    | Brain_cerebellum     |
| SLC4A1AP | 20.6308    | Brain_cortex         |
| SLC4A1AP | 3.49516    | Breast               |
| SLC4A1AP | 3.71133    | Muscle               |
| SLC4A1AP | 4.50918    | Lung                 |
| SLC4A1AP | 5.1441     | Vascular_endothelium |
| SLC4A1AP | 6.24434    | Prostate             |
| SLC4A1AP | 7.30127    | Spinal_cord          |
| SLC4A1AP | 7.37912    | stem_cell            |
| SLC4A1AP | 7.74398    | White_Blood_Cells    |
| SLC4A1AP | 9.764      | Retina               |
| NCBP1    | 3.65063    | Spinal_cord          |
| NCBP2    | 10.8548    | stem_cell            |
| NCBP2    | 11.9083    | Brain_cerebellum     |
| NCBP2    | 17.4471    | Vascular_endothelium |
| NCBP2    | 3.45012    | Thyroid              |
| NCBP2    | 3.65063    | Spinal_cord          |
| NCBP2    | 3.70734    | Muscle               |
| NCBP2    | 3.79824    | Retina               |
| NCBP2    | 3.88493    | Brain_astrocyte      |
| NCBP2    | 4.00156    | White_Blood_Cells    |
| NCBP2    | 4.2448     | Brain_cortex         |
| NCBP2    | 7.91891    | Breast               |
| NCBP2    | 8.34527    | Prostate             |
| NCBP2    | 9.31337    | Eye                  |
| NHP2L1   | 141.6359   | Prostate             |
| NHP2L1   | 15.08113   | Liver                |
| NHP2L1   | 18.62674   | Eye                  |
| NHP2L1   | 24.5389    | Stomach              |
| NHP2L1   | 25.9634    | Muscle               |

© 2009 Landes Bioscience.  
Do not distribute.

*Supplementary file 7*

| RBPs   | Tag freque | Tissue               |
|--------|------------|----------------------|
| NHP2L1 | 27.10973   | Vascular_endothelium |
| NHP2L1 | 38.8493    | Brain_astrocyte      |
| NHP2L1 | 39.6944    | Brain_cerebellum     |
| NHP2L1 | 4.03145    | Colon                |
| NHP2L1 | 41.4015    | Thyroid              |
| NHP2L1 | 42.8371    | Lung                 |
| NHP2L1 | 43.8076    | Spinal_cord          |
| NHP2L1 | 46.4193    | Brain_cortex         |
| NHP2L1 | 51.6809    | White_Blood_Cells    |
| NHP2L1 | 53.7725    | Placenta             |
| NHP2L1 | 67.4187    | Heart                |
| NHP2L1 | 75.1537    | Breast               |
| NHP2L1 | 92.7738    | stem_cell            |
| NHP2L1 | 95.0863    | Retina               |
| NKRF   | 3.01623    | Liver                |
| NKRF   | 3.12217    | Prostate             |
| NKRF   | 3.43755    | Breast               |
| NKRF   | 3.48943    | Vascular_endothelium |
| NKRF   | 3.88493    | Brain_astrocyte      |
| NKRF   | 9.18875    | stem_cell            |
| NOL3   | 11.06845   | Brain_cortex         |
| NOL3   | 13.45488   | Retina               |
| NOL3   | 16.11449   | Prostate             |
| NOL3   | 19.26248   | Heart                |
| NOL3   | 25.9634    | Muscle               |
| NOL3   | 3.01623    | Liver                |
| NOL3   | 3.96944    | Brain_cerebellum     |
| NOL3   | 4.65669    | Eye                  |
| NOL3   | 5.63944    | White_Blood_Cells    |
| NOL3   | 7.74564    | Vascular_endothelium |
| NOL3   | 8.14156    | Placenta             |
| NOL3   | 9.01835    | Lung                 |
| NOL4   | 3.96944    | Brain_cerebellum     |
| NOL4   | 7.71615    | Vascular_endothelium |
| NOL8   | 3.01623    | Liver                |
| NOL8   | 3.70734    | Muscle               |
| NOL8   | 3.9056     | Retina               |
| NOL8   | 3.95159    | White_Blood_Cells    |
| NOL8   | 4.50918    | Lung                 |
| NOL8   | 5.17518    | Thyroid              |
| NOL8   | 7.01471    | Vascular_endothelium |
| NONO   | 14.7582    | stem_cell            |
| NONO   | 3.12217    | Prostate             |
| NONO   | 3.35227    | Retina               |
| NONO   | 3.93229    | White_Blood_Cells    |
| NONO   | 5.7966     | Breast               |
| NOP56  | 3.49516    | Breast               |
| NOP56  | 4.48395    | stem_cell            |
| NOP56  | 7.01471    | Vascular_endothelium |
| NOP56  | 7.45351    | Retina               |
| NOP56  | 7.74398    | White_Blood_Cells    |
| NOVA1  | 11.0687    | stem_cell            |

©2009 Landes Bioscience.  
Do not distribute.



Supplementary file 7

| RBPs   | Tag freque | Tissue               |
|--------|------------|----------------------|
| NOVA1  | 7.01471    | Vascular_endothelium |
| NOVA1  | 7.30127    | Spinal_cord          |
| NOVA2  | 3.49516    | Breast               |
| NOVA2  | 3.96944    | Brain_cerebellum     |
| NOVA2  | 7.37912    | stem_cell            |
| NPM1   | 10.4683    | Vascular_endothelium |
| NPM1   | 10.9062    | Stomach              |
| NPM1   | 11.0199    | White_Blood_Cells    |
| NPM1   | 12.4887    | Prostate             |
| NPM1   | 13.9806    | Breast               |
| NPM1   | 15.0811    | Liver                |
| NPM1   | 3.20251    | Brain_cortex         |
| NPM1   | 3.79824    | Retina               |
| NPM1   | 3.96944    | Brain_cerebellum     |
| NPM1   | 4.50918    | Lung                 |
| NPM1   | 4.65669    | Eye                  |
| NPM1   | 5.17518    | Thyroid              |
| NPM1   | 66.9068    | stem_cell            |
| NPM1   | 6.72156    | Placenta             |
| NCL    | 18.62679   | Eye                  |
| NCL    | 226.8787   | Breast               |
| NCL    | 33.402     | Muscle               |
| NCL    | 341.549    | stem_cell            |
| NCL    | 39.6943    | Brain_cerebellum     |
| NCL    | 40.1569    | Spinal_cord          |
| NCL    | 40.9328    | Heart                |
| NCL    | 41.8473    | Prostate             |
| NCL    | 42.2272    | Liver                |
| NCL    | 54.389     | Brain_astrocyte      |
| NCL    | 55.8584    | Brain_cortex         |
| NCL    | 59.4457    | Placenta             |
| NCL    | 59.4625    | Retina               |
| NCL    | 68.516     | White_Blood_Cells    |
| NCL    | 73.4361    | Vascular_endothelium |
| NCL    | 77.6277    | Thyroid              |
| NCL    | 79.0697    | Stomach              |
| NCL    | 8.06289    | Colon                |
| NCL    | 92.4381    | Lung                 |
| NUFIP1 | 3.45012    | Thyroid              |
| NUFIP1 | 3.48943    | Vascular_endothelium |
| NUFIP1 | 3.49516    | Breast               |
| NUFIP1 | 3.88493    | Brain_astrocyte      |
| NUFIP1 | 5.56351    | Prostate             |
| NUFIP1 | 6.07128    | White_Blood_Cells    |
| NUFIP1 | 7.37912    | stem_cell            |
| HRB    | 3.20251    | Brain_cortex         |
| HRB    | 3.37399    | Prostate             |
| HRB    | 3.48943    | Vascular_endothelium |
| HRB    | 3.71575    | White_Blood_Cells    |
| HRB    | 3.88493    | Brain_astrocyte      |
| HRB    | 5.27235    | stem_cell            |
| HRB    | 5.45308    | Stomach              |

Landes Bioscience.  
Do not distribute.

*Supplementary file 7*

| RBPs  | Tag freque | Tissue               |
|-------|------------|----------------------|
| HRB   | 6.72156    | Placenta             |
| HRB   | 7.30127    | Spinal_cord          |
| HRB   | 7.91891    | Breast               |
| NXF1  | 12.8602    | Vascular_endothelium |
| NXF1  | 3.65063    | Spinal_cord          |
| NXF1  | 40.0156    | White_Blood_Cells    |
| NXF1  | 6.24434    | Prostate             |
| NXF1  | 7.22343    | Heart                |
| NXF1  | 7.91891    | Breast               |
| NXF1  | 8.14108    | stem_cell            |
| NXF2  | 3.20251    | Brain_cortex         |
| NXF2  | 6.24434    | Prostate             |
| PABP2 | 102.811    | stem_cell            |
| PABP2 | 12.0649    | Liver                |
| PABP2 | 15.5397    | Brain_astrocyte      |
| PABP2 | 15.7821    | Lung                 |
| PABP2 | 18.9757    | Thyroid              |
| PABP2 | 24.5515    | Vascular_endothelium |
| PABP2 | 29.726     | White_Blood_Cells    |
| PABP2 | 30.9462    | Brain_cortex         |
| PABP2 | 31.7555    | Brain_cerebellum     |
| PABP2 | 37.813     | Breast               |
| PABP2 | 39.3403    | Placenta             |
| PABP2 | 43.6247    | Stomach              |
| PABP2 | 46.8326    | Prostate             |
| PABP2 | 58.4101    | Spinal_cord          |
| PABP2 | 58.8727    | Retina               |
| PABP2 | 7.41468    | Muscle               |
| PABP2 | 9.31337    | Eye                  |
| PABP2 | 9.63124    | Heart                |
| PABP4 | 14.4915    | Breast               |
| PABP4 | 23.6179    | Prostate             |
| PABP4 | 25.5599    | White_Blood_Cells    |
| PABP4 | 25.9514    | Muscle               |
| PABP4 | 27.9154    | Vascular_endothelium |
| PABP4 | 3.01623    | Liver                |
| PABP4 | 3.45012    | Thyroid              |
| PABP4 | 34.9644    | Brain_astrocyte      |
| PABP4 | 3.96944    | Brain_cerebellum     |
| PABP4 | 4.81562    | Heart                |
| PABP4 | 50.4092    | stem_cell            |
| PABP4 | 5.8584     | Retina               |
| PABP4 | 6.40502    | Brain_cortex         |
| PABP4 | 6.98503    | Eye                  |
| PABP4 | 7.30127    | Spinal_cord          |
| PABP4 | 8.17962    | Stomach              |
| PABP5 | 3.20251    | Brain_cortex         |
| PABP5 | 3.49516    | Breast               |
| PABP5 | 4.797443   | stem_cell            |
| PAIP1 | 10.1188    | White_Blood_Cells    |
| PAIP1 | 10.12197   | Prostate             |
| PAIP1 | 11.122     | Muscle               |

2009 Landes Bioscience.  
Do not distribute.

Supplementary file 7

| RBPs      | Tag freque | Tissue               |
|-----------|------------|----------------------|
| PAIP1     | 12.0391    | Heart                |
| PAIP1     | 18.0043    | Vascular_endothelium |
| PAIP1     | 22.34347   | Retina               |
| PAIP1     | 3.38745    | Placenta             |
| PAIP1     | 33.94018   | stem_cell            |
| PAIP1     | 3.45012    | Thyroid              |
| PAIP1     | 3.88493    | Brain_astrocyte      |
| PAIP1     | 3.95946    | Breast               |
| PAIP1     | 4.03145    | Colon                |
| PAIP1     | 4.65669    | Eye                  |
| PAIP1     | 5.1577     | Brain_cortex         |
| PAIP1     | 7.30127    | Spinal_cord          |
| PAIP1     | 7.93888    | Brain_cerebellum     |
| PAIP1     | 9.01836    | Lung                 |
| PAIP1     | 9.04868    | Liver                |
| C20orf119 | 15.7361    | Placenta             |
| C20orf119 | 3.20251    | Brain_cortex         |
| C20orf119 | 3.95946    | Breast               |
| C20orf119 | 6.76376    | Lung                 |
| C20orf119 | 7.01471    | Vascular_endothelium |
| C20orf119 | 7.43149    | White_Blood_Cells    |
| C20orf119 | 7.97146    | stem_cell            |
| PAPOLA    | 10.4855    | Breast               |
| PAPOLA    | 11.6185    | Vascular_endothelium |
| PAPOLA    | 11.6548    | Brain_astrocyte      |
| PAPOLA    | 12.9536    | stem_cell            |
| PAPOLA    | 3.01623    | Liver                |
| PAPOLA    | 3.45012    | Thyroid              |
| PAPOLA    | 3.71133    | Muscle               |
| PAPOLA    | 4.2448     | Brain_cortex         |
| PAPOLA    | 4.50918    | Lung                 |
| PAPOLA    | 4.81562    | Heart                |
| PAPOLA    | 5.45308    | Stomach              |
| PAPOLA    | 8.09504    | White_Blood_Cells    |
| PAPOLA    | 8.36622    | Prostate             |
| PAPOLG    | 10.88753   | Vascular_endothelium |
| PAPOLG    | 11.14798   | Prostate             |
| PAPOLG    | 3.9056     | Retina               |
| PAPOLG    | 3.96944    | Brain_cerebellum     |
| PAPOLG    | 5.17518    | Thyroid              |
| PAPOLG    | 6.76377    | Lung                 |
| PAPOLG    | 7.30126    | Spinal_cord          |
| PAPOLG    | 7.76986    | Brain_astrocyte      |
| PAPOLG    | 9.29176    | Breast               |
| PAPOLG    | 9.56221    | Placenta             |
| PAPOLG    | 9.842092   | stem_cell            |
| PCBP1     | 15.8777    | Brain_cerebellum     |
| PCBP1     | 16.2984    | Eye                  |
| PCBP1     | 19.1016    | Brain_cortex         |
| PCBP1     | 20.2439    | Prostate             |
| PCBP1     | 21.1136    | Liver                |
| PCBP1     | 23.4336    | Retina               |

Landes Bioscience.  
Do not distribute.

*Supplementary file 7*

| RBPs    | Tag freque | Tissue               |
|---------|------------|----------------------|
| PCBP1   | 29.992     | Stomach              |
| PCBP1   | 36.1172    | Heart                |
| PCBP1   | 37.9513    | Thyroid              |
| PCBP1   | 38.5807    | Vascular_endothelium |
| PCBP1   | 40.157     | Spinal_cord          |
| PCBP1   | 40.3294    | Placenta             |
| PCBP1   | 40.5826    | Lung                 |
| PCBP1   | 40.7808    | Muscle               |
| PCBP1   | 54.389     | Brain_astrocyte      |
| PCBP1   | 61.2497    | White_Blood_Cells    |
| PCBP1   | 8.06289    | Colon                |
| PCBP1   | 85.9387    | Breast               |
| PCBP1   | 89.2556    | stem_cell            |
| PCBP2   | 13.5275    | Lung                 |
| PCBP2   | 15.4731    | Brain_cortex         |
| PCBP2   | 15.6224    | Retina               |
| PCBP2   | 16.8547    | Heart                |
| PCBP2   | 17.4471    | Vascular_endothelium |
| PCBP2   | 18.2532    | Spinal_cord          |
| PCBP2   | 19.4246    | Brain_astrocyte      |
| PCBP2   | 19.6701    | Placenta             |
| PCBP2   | 24.0628    | Breast               |
| PCBP2   | 30.3659    | Prostate             |
| PCBP2   | 31.0511    | Thyroid              |
| PCBP2   | 36.733     | White_Blood_Cells    |
| PCBP2   | 3.96944    | Brain_cerebellum     |
| PCBP2   | 5.45308    | Stomach              |
| PCBP2   | 56.825     | stem_cell            |
| PCBP2   | 7.42267    | Muscle               |
| PCBP2   | 8.06289    | Colon                |
| PCBP2   | 9.04868    | Liver                |
| PCBP2   | 9.31337    | Eye                  |
| PCBP3   | 15.6224    | Retina               |
| PCBP3   | 15.8777    | Brain_cerebellum     |
| PCBP3   | 16.2984    | Eye                  |
| PCBP3   | 3.71575    | White_Blood_Cells    |
| PCBP3   | 3.88493    | Brain_astrocyte      |
| POLDIP3 | 11.2026    | Placenta             |
| POLDIP3 | 11.6548    | Brain_astrocyte      |
| POLDIP3 | 13.496     | Prostate             |
| POLDIP3 | 16.0249    | stem_cell            |
| POLDIP3 | 18.3665    | White_Blood_Cells    |
| POLDIP3 | 3.01623    | Liver                |
| POLDIP3 | 3.20251    | Brain_cortex         |
| POLDIP3 | 3.45012    | Thyroid              |
| POLDIP3 | 3.49516    | Breast               |
| POLDIP3 | 3.65063    | Spinal_cord          |
| POLDIP3 | 4.50918    | Lung                 |
| POLDIP3 | 4.65669    | Eye                  |
| POLDIP3 | 5.69736    | Retina               |
| POLDIP3 | 6.97885    | Vascular_endothelium |
| POLDIP3 | 7.41468    | Muscle               |

© 2009 Landes Bioscience.  
Do not distribute.

*Supplementary file 7*

| RBPs    | Tag freque | Tissue               |
|---------|------------|----------------------|
| POLDIP3 | 7.93887    | Brain_cerebellum     |
| SF3B14  | 13.4431    | Placenta             |
| SF3B14  | 14.0055    | White_Blood_Cells    |
| SF3B14  | 15.5255    | Thyroid              |
| SF3B14  | 15.5397    | Brain_astrocyte      |
| SF3B14  | 23.7567    | Breast               |
| SF3B14  | 27.2654    | Stomach              |
| SF3B14  | 27.9154    | Vascular_endothelium |
| SF3B14  | 4.03145    | Colon                |
| SF3B14  | 40.5882    | Prostate             |
| SF3B14  | 41.6526    | stem_cell            |
| SF3B14  | 5.1577     | Brain_cortex         |
| SF3B14  | 6.03245    | Liver                |
| SF3B14  | 7.42267    | Muscle               |
| SF3B14  | 7.93887    | Brain_cerebellum     |
| SF3B14  | 9.01835    | Lung                 |
| SF3B14  | 9.63124    | Heart                |
| PNPT1   | 3.12217    | Prostate             |
| PNPT1   | 3.87282    | Vascular_endothelium |
| PPP1R8  | 10.9062    | Stomach              |
| PPP1R8  | 11.1472    | White_Blood_Cells    |
| PPP1R8  | 11.155     | Prostate             |
| PPP1R8  | 11.2729    | Lung                 |
| PPP1R8  | 11.6417    | Eye                  |
| PPP1R8  | 11.6548    | Brain_astrocyte      |
| PPP1R8  | 12.8942    | Brain_cortex         |
| PPP1R8  | 13.7502    | Breast               |
| PPP1R8  | 14.4469    | Heart                |
| PPP1R8  | 15.6836    | Placenta             |
| PPP1R8  | 23.9821    | stem_cell            |
| PPP1R8  | 3.01623    | Liver                |
| PPP1R8  | 3.45012    | Thyroid              |
| PPP1R8  | 3.65063    | Spinal_cord          |
| PPP1R8  | 3.71133    | Muscle               |
| PPP1R8  | 3.96944    | Brain_cerebellum     |
| PPP1R8  | 4.03145    | Colon                |
| PPP1R8  | 5.1441     | Vascular_endothelium |
| PPP1R8  | 9.49559    | Retina               |
| PPIE    | 11.6185    | Vascular_endothelium |
| PPIE    | 11.8628    | stem_cell            |
| PPIE    | 18.5787    | White_Blood_Cells    |
| PPIE    | 3.01623    | Liver                |
| PPIE    | 3.38745    | Placenta             |
| PPIE    | 3.88493    | Brain_astrocyte      |
| PPIE    | 3.9056     | Retina               |
| PPIE    | 4.50918    | Lung                 |
| PPIE    | 5.56351    | Prostate             |
| PPIE    | 5.7966     | Breast               |
| PPIE    | 6.98503    | Eye                  |
| PPIE    | 7.30127    | Spinal_cord          |
| PPIE    | 7.41468    | Muscle               |
| PPIL4   | 17.4471    | Vascular_endothelium |

©2009 Landes Bioscience.  
Do not distribute.

Supplementary file 7

| RBPs     | Tag freque | Tissue               |
|----------|------------|----------------------|
| PPIL4    | 3.01623    | Liver                |
| PPIL4    | 3.20251    | Brain_cortex         |
| PPIL4    | 3.43755    | Breast               |
| PPIL4    | 4.48104    | Placenta             |
| PPIL4    | 4.876646   | stem_cell            |
| PPIL4    | 7.30127    | Spinal_cord          |
| PPIL4    | 8.36622    | Prostate             |
| PPRC1    | 3.12217    | Prostate             |
| PPRC1    | 3.20251    | Brain_cortex         |
| PPRC1    | 3.71133    | Muscle               |
| PPRC1    | 3.93229    | White_Blood_Cells    |
| PPRC1    | 3.96944    | Brain_cerebellum     |
| PPRC1    | 5.53434    | stem_cell            |
| PPARGC1E | 3.87199    | White_Blood_Cells    |
| PPARGC1E | 7.93887    | Brain_cerebellum     |
| PRKRA    | 11.27294   | Lung                 |
| PRKRA    | 11.35647   | Breast               |
| PRKRA    | 12.0391    | Heart                |
| PRKRA    | 12.86025   | Vascular_endothelium |
| PRKRA    | 13.80048   | Thyroid              |
| PRKRA    | 14.60253   | Spinal_cord          |
| PRKRA    | 14.83735   | Muscle               |
| PRKRA    | 16.36634   | Prostate             |
| PRKRA    | 19.77131   | stem_cell            |
| PRKRA    | 22.78939   | Retina               |
| PRKRA    | 4.00156    | White_Blood_Cells    |
| PRKRA    | 4.65669    | Eye                  |
| PRKRA    | 5.35446    | Placenta             |
| PRKRA    | 7.76986    | Brain_astrocyte      |
| PRKRA    | 7.93888    | Brain_cerebellum     |
| PRKRA    | 9.4025     | Brain_cortex         |
| PSMA1    | 10.0568    | Retina               |
| PSMA1    | 12.81      | Brain_cortex         |
| PSMA1    | 13.6327    | Stomach              |
| PSMA1    | 14.4469    | Heart                |
| PSMA1    | 15.8777    | Brain_cerebellum     |
| PSMA1    | 18.5367    | Muscle               |
| PSMA1    | 19.7973    | Breast               |
| PSMA1    | 20.1572    | Colon                |
| PSMA1    | 25.0987    | Prostate             |
| PSMA1    | 31.0794    | Brain_astrocyte      |
| PSMA1    | 40.0156    | White_Blood_Cells    |
| PSMA1    | 4.48104    | Placenta             |
| PSMA1    | 46.4738    | Vascular_endothelium |
| PSMA1    | 54.9919    | stem_cell            |
| PSMA1    | 6.03245    | Liver                |
| PSMA1    | 6.90024    | Thyroid              |
| PSMA1    | 7.30127    | Spinal_cord          |
| PSMA1    | 9.31337    | Eye                  |
| PSPC1    | 11.616     | White_Blood_Cells    |
| PSPC1    | 3.01623    | Liver                |
| PSPC1    | 3.20251    | Brain_cortex         |

© 2009 Landes Bioscience.  
Do not distribute.

Supplementary file 7

| RBPs     | Tag freque | Tissue               |
|----------|------------|----------------------|
| PSPC1    | 3.37399    | Prostate             |
| PSPC1    | 3.45012    | Thyroid              |
| PSPC1    | 3.50736    | Vascular_endothelium |
| PSPC1    | 3.65063    | Spinal_cord          |
| PSPC1    | 3.70734    | Muscle               |
| PSPC1    | 3.79824    | Retina               |
| PSPC1    | 3.96944    | Brain_cerebellum     |
| PSPC1    | 4.7132     | stem_cell            |
| PSPC1    | 6.8751     | Breast               |
| PSPC1    | 8.46862    | Placenta             |
| PTBP1    | 11.6417    | Eye                  |
| PTBP1    | 121.5538   | stem_cell            |
| PTBP1    | 12.81      | Brain_cortex         |
| PTBP1    | 13.91574   | Prostate             |
| PTBP1    | 23.75676   | Breast               |
| PTBP1    | 24.1887    | Colon                |
| PTBP1    | 3.65063    | Spinal_cord          |
| PTBP1    | 3.71133    | Muscle               |
| PTBP1    | 3.88493    | Brain_astrocyte      |
| PTBP1    | 3.96944    | Brain_cerebellum     |
| PTBP1    | 5.69736    | Retina               |
| PTBP1    | 71.7839    | Vascular_endothelium |
| PTBP1    | 7.59476    | Placenta             |
| PTBP1    | 82.83626   | White_Blood_Cells    |
| PTBP2    | 3.12217    | Prostate             |
| PTBP2    | 3.35227    | Retina               |
| PTBP2    | 3.38745    | Placenta             |
| PTBP2    | 3.49516    | Breast               |
| PTBP2    | 3.65063    | Spinal_cord          |
| PTBP2    | 6.9421     | stem_cell            |
| Q8TC92   | 4.65669    | Eye                  |
| QKI      | 11.122     | Muscle               |
| QKI      | 11.6548    | Brain_astrocyte      |
| QKI      | 13.4091    | Retina               |
| QKI      | 15.2435    | Placenta             |
| QKI      | 19.8472    | Brain_cerebellum     |
| QKI      | 22.0086    | White_Blood_Cells    |
| QKI      | 226.339    | Spinal_cord          |
| QKI      | 26.0847    | Breast               |
| QKI      | 26.4859    | Heart                |
| QKI      | 29.3096    | Lung                 |
| QKI      | 4.65669    | Eye                  |
| QKI      | 5.17518    | Thyroid              |
| QKI      | 6.03245    | Liver                |
| QKI      | 71.9464    | stem_cell            |
| QKI      | 77.3654    | Brain_cortex         |
| QKI      | 7.74563    | Vascular_endothelium |
| RAD51AP1 | 15.2062    | stem_cell            |
| RAD51AP1 | 4.48104    | Placenta             |
| RAD51AP1 | 5.69736    | Retina               |
| RAD51AP1 | 6.97885    | Vascular_endothelium |
| RAE1     | 10.2765    | stem_cell            |

Landes Bioscience.  
Do not distribute.

*Supplementary file 7*

| RBPs   | Tag freque | Tissue               |
|--------|------------|----------------------|
| RAE1   | 14.1663    | White_Blood_Cells    |
| RAE1   | 3.79824    | Retina               |
| RAE1   | 3.88493    | Brain_astrocyte      |
| RAE1   | 6.74798    | Prostate             |
| RAE1   | 6.99032    | Breast               |
| RAE1   | 7.74563    | Vascular_endothelium |
| RBM12B | 3.48943    | Vascular_endothelium |
| RBM12B | 5.73526    | stem_cell            |
| RBM15B | 3.01623    | Liver                |
| RBM15B | 4.45458    | stem_cell            |
| RBM15B | 7.43149    | White_Blood_Cells    |
| RBM35A | 3.93403    | Placenta             |
| RBM35A | 4.03145    | Colon                |
| RBM35A | 9.41337    | stem_cell            |
| RBM35B | 13.7691    | Placenta             |
| RBM35B | 15.0811    | Liver                |
| RBM35B | 3.49516    | Breast               |
| RBM35B | 4.50918    | Lung                 |
| RBM35B | 5.45308    | Stomach              |
| RBM35B | 5.57748    | Prostate             |
| RBM35B | 8.06289    | Colon                |
| RBM35B | 8.60289    | stem_cell            |
| RBM10  | 11.9083    | Brain_cerebellum     |
| RBM10  | 13.496     | Prostate             |
| RBM10  | 3.45012    | Thyroid              |
| RBM10  | 3.65063    | Spinal_cord          |
| RBM10  | 3.71133    | Muscle               |
| RBM10  | 3.88493    | Brain_astrocyte      |
| RBM10  | 43.7248    | Vascular_endothelium |
| RBM10  | 5.90104    | Placenta             |
| RBM10  | 62.9166    | White_Blood_Cells    |
| RBM10  | 6.70455    | Retina               |
| RBM10  | 6.76376    | Lung                 |
| RBM10  | 75.636     | stem_cell            |
| RBM10  | 7.73655    | Brain_cortex         |
| RBM10  | 7.91891    | Breast               |
| RBM11  | 3.65063    | Spinal_cord          |
| RBM11  | 3.96944    | Brain_cerebellum     |
| RBM11  | 5.1577     | Brain_cortex         |
| RBM11  | 9.764      | Retina               |
| RBM12  | 10.02616   | Brain_cortex         |
| RBM12  | 11.64172   | Eye                  |
| RBM12  | 14.83734   | Muscle               |
| RBM12  | 24.0308    | Prostate             |
| RBM12  | 25.30871   | Breast               |
| RBM12  | 3.01623    | Liver                |
| RBM12  | 31.07939   | Brain_astrocyte      |
| RBM12  | 39.05608   | White_Blood_Cells    |
| RBM12  | 3.96944    | Brain_cerebellum     |
| RBM12  | 5.45308    | Stomach              |
| RBM12  | 5.67955    | Retina               |
| RBM12  | 60.6854    | stem_cell            |

©2009 Landes Bioscience.  
Do not distribute.



*Supplementary file 7*

| RBPs  | Tag freque | Tissue               |
|-------|------------|----------------------|
| RBM12 | 7.86827    | Placenta             |
| RBM12 | 8.6253     | Thyroid              |
| RBM12 | 94.26034   | Vascular_endothelium |
| RBM14 | 11.1472    | White_Blood_Cells    |
| RBM14 | 12.4554    | stem_cell            |
| RBM14 | 14.0294    | Vascular_endothelium |
| RBM14 | 16.2984    | Eye                  |
| RBM14 | 3.71133    | Muscle               |
| RBM14 | 3.95946    | Breast               |
| RBM14 | 4.2448     | Brain_cortex         |
| RBM14 | 6.24434    | Prostate             |
| RBM15 | 3.87282    | Vascular_endothelium |
| RBM15 | 4.65669    | Eye                  |
| RBM16 | 3.01623    | Liver                |
| RBM16 | 3.49516    | Breast               |
| RBM16 | 3.88493    | Brain_astrocyte      |
| RBM16 | 4.03145    | Colon                |
| RBM16 | 5.89843    | White_Blood_Cells    |
| RBM16 | 9.54251    | stem_cell            |
| RBM18 | 11.134     | Muscle               |
| RBM18 | 11.2026    | Placenta             |
| RBM18 | 3.20251    | Brain_cortex         |
| RBM18 | 3.85192    | Retina               |
| RBM18 | 3.96944    | Brain_cerebellum     |
| RBM18 | 5.87277    | White_Blood_Cells    |
| RBM18 | 7.74563    | Vascular_endothelium |
| RBM18 | 7.98604    | stem_cell            |
| RBM18 | 8.95147    | Prostate             |
| RBM18 | 9.63124    | Heart                |
| RBM19 | 3.88493    | Brain_astrocyte      |
| RBM22 | 10.122     | Prostate             |
| RBM22 | 10.9062    | Stomach              |
| RBM22 | 11.9083    | Brain_cerebellum     |
| RBM22 | 3.20251    | Brain_cortex         |
| RBM22 | 3.38745    | Placenta             |
| RBM22 | 3.48943    | Vascular_endothelium |
| RBM22 | 3.65063    | Spinal_cord          |
| RBM22 | 6.8751     | Breast               |
| RBM22 | 7.43149    | White_Blood_Cells    |
| RBM22 | 7.76986    | Brain_astrocyte      |
| RBM22 | 9.46611    | stem_cell            |
| RBM23 | 10.9519    | Spinal_cord          |
| RBM23 | 11.2729    | Lung                 |
| RBM23 | 11.6417    | Eye                  |
| RBM23 | 11.6548    | Brain_astrocyte      |
| RBM23 | 12.0943    | Colon                |
| RBM23 | 18.4478    | stem_cell            |
| RBM23 | 18.631     | Placenta             |
| RBM23 | 19.6614    | White_Blood_Cells    |
| RBM23 | 21.8123    | Stomach              |
| RBM23 | 22.4176    | Brain_cortex         |
| RBM23 | 24.1508    | Thyroid              |

Landes Bioscience.  
Do not distribute.

*Supplementary file 7*

| RBPs  | Tag freque | Tissue               |
|-------|------------|----------------------|
| RBM23 | 3.01623    | Liver                |
| RBM23 | 30.1705    | Retina               |
| RBM23 | 6.74798    | Prostate             |
| RBM23 | 7.42267    | Muscle               |
| RBM23 | 7.74563    | Vascular_endothelium |
| RBM23 | 7.91891    | Breast               |
| RBM23 | 9.63124    | Heart                |
| RBM24 | 21.6703    | Heart                |
| RBM24 | 3.12217    | Prostate             |
| RBM24 | 3.35227    | Retina               |
| RBM24 | 3.87282    | Vascular_endothelium |
| RBM24 | 3.88493    | Brain_astrocyte      |
| RBM24 | 3.93403    | Placenta             |
| RBM24 | 63.0927    | Muscle               |
| RBM25 | 10.122     | Prostate             |
| RBM25 | 11.3947    | Retina               |
| RBM25 | 13.6327    | Stomach              |
| RBM25 | 3.01623    | Liver                |
| RBM25 | 3.70734    | Muscle               |
| RBM25 | 3.88493    | Brain_astrocyte      |
| RBM25 | 4.81562    | Heart                |
| RBM25 | 4.86966    | stem_cell            |
| RBM25 | 5.1441     | Vascular_endothelium |
| RBM25 | 5.90104    | Placenta             |
| RBM25 | 6.90024    | Thyroid              |
| RBM25 | 7.30127    | Spinal_cord          |
| RBM25 | 7.74398    | White_Blood_Cells    |
| RBM25 | 7.93887    | Brain_cerebellum     |
| RBM25 | 9.01835    | Lung                 |
| RBM26 | 11.459     | stem_cell            |
| RBM26 | 13.6327    | Stomach              |
| RBM26 | 3.01623    | Liver                |
| RBM26 | 30.9759    | White_Blood_Cells    |
| RBM26 | 3.88493    | Brain_astrocyte      |
| RBM26 | 4.2448     | Brain_cortex         |
| RBM26 | 5.90104    | Placenta             |
| RBM26 | 6.90024    | Thyroid              |
| RBM26 | 6.98503    | Eye                  |
| RBM26 | 6.99032    | Breast               |
| RBM26 | 7.01471    | Vascular_endothelium |
| RBM26 | 7.30127    | Spinal_cord          |
| RBM26 | 7.59648    | Retina               |
| RBM27 | 3.87282    | Vascular_endothelium |
| RBM27 | 3.88493    | Brain_astrocyte      |
| RBM27 | 3.96944    | Brain_cerebellum     |
| RBM27 | 5.550247   | stem_cell            |
| RBM28 | 3.35227    | Retina               |
| RBM28 | 3.49516    | Breast               |
| RBM28 | 3.65063    | Spinal_cord          |
| RBM28 | 3.71133    | Muscle               |
| RBM28 | 4.03145    | Colon                |
| RBM28 | 4.48104    | Placenta             |

© 2009 Landes Bioscience.  
Do not distribute.

*Supplementary file 7*

| RBPs  | Tag freque | Tissue               |
|-------|------------|----------------------|
| RBM28 | 5.57748    | Prostate             |
| RBM28 | 7.74563    | Vascular_endothelium |
| RBM3  | 10.9519    | Spinal_cord          |
| RBM3  | 11.122     | Muscle               |
| RBM3  | 12.0943    | Colon                |
| RBM3  | 12.81      | Brain_cortex         |
| RBM3  | 15.8777    | Brain_cerebellum     |
| RBM3  | 16.2984    | Eye                  |
| RBM3  | 24.9774    | Prostate             |
| RBM3  | 27.526     | White_Blood_Cells    |
| RBM3  | 29.218     | stem_cell            |
| RBM33 | 11.1803    | Retina               |
| RBM33 | 11.8548    | White_Blood_Cells    |
| RBM3  | 31.3015    | Heart                |
| RBM3  | 31.4564    | Breast               |
| RBM33 | 3.70734    | Muscle               |
| RBM33 | 3.87282    | Vascular_endothelium |
| RBM33 | 3.95946    | Breast               |
| RBM33 | 3.96944    | Brain_cerebellum     |
| RBM33 | 4.50918    | Lung                 |
| RBM33 | 6.40502    | Brain_cortex         |
| RBM3  | 38.1716    | Stomach              |
| RBM34 | 11.7593    | stem_cell            |
| RBM34 | 3.37399    | Prostate             |
| RBM34 | 3.45012    | Thyroid              |
| RBM34 | 3.88493    | Brain_astrocyte      |
| RBM34 | 3.93403    | Placenta             |
| RBM34 | 3.95159    | White_Blood_Cells    |
| RBM34 | 3.95946    | Breast               |
| RBM34 | 6.3672     | Brain_cortex         |
| RBM3  | 46.6191    | Brain_astrocyte      |
| RBM34 | 6.97885    | Vascular_endothelium |
| RBM3  | 47.3464    | Lung                 |
| RBM3  | 53.7725    | Placenta             |
| RBM3  | 6.03245    | Liver                |
| RBM38 | 10.122     | Prostate             |
| RBM38 | 11.6548    | Brain_astrocyte      |
| RBM38 | 11.9083    | Brain_cerebellum     |
| RBM38 | 22.6141    | stem_cell            |
| RBM38 | 24.1887    | Colon                |
| RBM38 | 3.01623    | Liver                |
| RBM38 | 37.0734    | Muscle               |
| RBM38 | 38.7199    | White_Blood_Cells    |
| RBM38 | 4.2448     | Brain_cortex         |
| RBM38 | 4.50918    | Lung                 |
| RBM3  | 8.6253     | Thyroid              |
| RBM38 | 6.7749     | Placenta             |
| RBM38 | 6.8751     | Breast               |
| RBM38 | 7.01471    | Vascular_endothelium |
| RBM38 | 7.22343    | Heart                |
| RBM38 | 9.31337    | Eye                  |
| RBM39 | 10.9519    | Spinal_cord          |

© 2009 Landes Bioscience.  
Do not distribute.

*Supplementary file 7*

| RBPs  | Tag freque | Tissue               |
|-------|------------|----------------------|
| RBM39 | 11.122     | Muscle               |
| RBM39 | 12.0943    | Colon                |
| RBM39 | 13.2938    | Retina               |
| RBM39 | 13.80052   | Thyroid              |
| RBM39 | 13.9701    | Eye                  |
| RBM39 | 15.6109    | Prostate             |
| RBM39 | 18.0367    | Lung                 |
| RBM39 | 20.77698   | stem_cell            |
| RBM39 | 3.88493    | Brain_astrocyte      |
| RBM39 | 39.3403    | Placenta             |
| RBM3  | 94.2145    | Vascular_endothelium |
| RBM39 | 43.62468   | Stomach              |
| RBM39 | 46.2969    | Vascular_endothelium |
| RBM39 | 6.3672     | Brain_cortex         |
| RBM39 | 69.413     | Breast               |
| RBM39 | 7.22343    | Heart                |
| RBM39 | 7.93887    | Brain_cerebellum     |
| RBM39 | 82.03198   | White_Blood_Cells    |
| RBM39 | 9.04868    | Liver                |
| RBM4  | 12.0754    | Thyroid              |
| RBM41 | 3.48943    | Vascular_endothelium |
| RBM4  | 13.9577    | Vascular_endothelium |
| RBM4  | 13.9806    | Breast               |
| RBM4  | 15.8777    | Brain_cerebellum     |
| RBM4  | 16.1901    | White_Blood_Cells    |
| RBM4  | 20.2926    | stem_cell            |
| RBM4  | 20.9551    | Eye                  |
| RBM4  | 23.6179    | Prostate             |
| RBM4  | 3.65063    | Spinal_cord          |
| RBM4  | 3.79824    | Retina               |
| RBM4  | 6.03245    | Liver                |
| RBM4  | 6.40502    | Brain_cortex         |
| RBM4  | 7.42267    | Muscle               |
| RBM4  | 7.76986    | Brain_astrocyte      |
| RBM4  | 8.06289    | Colon                |
| RBM4  | 8.96208    | Placenta             |
| RBM5  | 10.122     | Prostate             |
| RBM5  | 10.9062    | Stomach              |
| RBM5  | 11.122     | Muscle               |
| RBM5  | 13.3823    | stem_cell            |
| RBM5  | 13.6696    | Retina               |
| RBM5  | 15.7361    | Placenta             |
| RBM5  | 15.8777    | Brain_cerebellum     |
| RBM5  | 19.36      | White_Blood_Cells    |
| RBM5  | 25.5544    | Spinal_cord          |
| RBM5  | 27.1097    | Vascular_endothelium |
| RBM5  | 3.20251    | Brain_cortex         |
| RBM5  | 3.88493    | Brain_astrocyte      |
| RBM5  | 4.65669    | Eye                  |
| RBM5  | 5.7966     | Breast               |
| RBM5  | 6.76376    | Lung                 |
| RBM5  | 8.06289    | Colon                |

Landes Bioscience.  
Do not distribute.

Supplementary file 7

| RBPs  | Tag freque | Tissue               |
|-------|------------|----------------------|
| RBM6  | 11.9083    | Brain_cerebellum     |
| RBM6  | 13.5275    | Lung                 |
| RBM6  | 13.6327    | Stomach              |
| RBM6  | 15.5255    | Thyroid              |
| RBM6  | 21.4265    | stem_cell            |
| RBM6  | 21.6371    | Placenta             |
| RBM6  | 23.2096    | Brain_cortex         |
| RBM6  | 23.7567    | Breast               |
| RBM6  | 29.2051    | Spinal_cord          |
| RBM6  | 32.285     | Retina               |
| RBM6  | 43.7248    | Vascular_endothelium |
| RBM6  | 44.5227    | White_Blood_Cells    |
| RBM6  | 4.65669    | Eye                  |
| RBM6  | 6.74798    | Prostate             |
| RBM6  | 9.04868    | Liver                |
| RBM7  | 15.4447    | stem_cell            |
| RBM7  | 15.8378    | Breast               |
| RBM7  | 3.87282    | Vascular_endothelium |
| RBM7  | 5.56351    | Prostate             |
| RBM7  | 6.00234    | White_Blood_Cells    |
| RBM7  | 6.03245    | Liver                |
| RBM7  | 6.40502    | Brain_cortex         |
| RBM7  | 8.17962    | Stomach              |
| RBM7  | 9.01835    | Lung                 |
| RBM8A | 10.3504    | Thyroid              |
| RBM8A | 10.90616   | Stomach              |
| RBM8A | 10.9519    | Spinal_cord          |
| RBM8A | 11.2729    | Lung                 |
| RBM8A | 17.97662   | Placenta             |
| RBM8A | 20.82011   | Retina               |
| RBM8A | 27.8874    | Prostate             |
| RBM8A | 28.2925    | Vascular_endothelium |
| RBM8A | 3.01623    | Liver                |
| RBM8A | 31.0794    | Brain_astrocyte      |
| RBM8A | 3.71133    | Muscle               |
| RBM8A | 4.03145    | Colon                |
| RBM8A | 41.0024    | White_Blood_Cells    |
| RBM8A | 4.2448     | Brain_cortex         |
| RBM8A | 42.56781   | Breast               |
| RBM8A | 56.08299   | stem_cell            |
| RBM8A | 6.98503    | Eye                  |
| RBM8A | 7.22343    | Heart                |
| RBM8A | 7.93888    | Brain_cerebellum     |
| RBMS3 | 3.50736    | Vascular_endothelium |
| RBMS3 | 5.7966     | Breast               |
| RBP56 | 11.6185    | Vascular_endothelium |
| RBP56 | 11.6548    | Brain_astrocyte      |
| RBP56 | 27.1039    | White_Blood_Cells    |
| RBP56 | 3.01623    | Liver                |
| RBP56 | 3.35227    | Retina               |
| RBP56 | 3.37399    | Prostate             |
| RBP56 | 34.3734    | stem_cell            |

©2009 Landes Bioscience.  
Do not distribute.

*Supplementary file 7*

| RBPs  | Tag freque | Tissue               |
|-------|------------|----------------------|
| RBP56 | 3.71133    | Muscle               |
| RBP56 | 3.96944    | Brain_cerebellum     |
| RBP56 | 4.03145    | Colon                |
| RBP56 | 4.50918    | Lung                 |
| RBP56 | 4.65669    | Eye                  |
| RBP56 | 6.40502    | Brain_cortex         |
| RBP56 | 7.30127    | Spinal_cord          |
| RBP56 | 7.86805    | Placenta             |
| RBPMS | 10.122     | Prostate             |
| RBPMS | 10.3504    | Thyroid              |
| RBPMS | 15.7821    | Lung                 |
| RBPMS | 17.5368    | Vascular_endothelium |
| RBPMS | 39.5946    | Breast               |
| RBPMS | 4.48104    | Placenta             |
| RBPMS | 4.81562    | Heart                |
| RBPMS | 59.5037    | stem_cell            |
| RBPMS | 7.76986    | Brain_astrocyte      |
| RBPMS | 9.04868    | Liver                |
| RBPMS | 9.764      | Retina               |
| RED1  | 3.20251    | Brain_cortex         |
| RED1  | 3.65063    | Spinal_cord          |
| RED1  | 3.71133    | Muscle               |
| RED1  | 3.72675    | Retina               |
| RED2  | 3.49516    | Breast               |
| RENT1 | 3.70734    | Muscle               |
| RENT1 | 3.95946    | Breast               |
| RENT1 | 4.00156    | White_Blood_Cells    |
| RENT1 | 7.01471    | Vascular_endothelium |
| RIB1  | 10.9519    | Spinal_cord          |
| RIB1  | 13.40119   | Retina               |
| RIB1  | 14.14157   | Brain_cortex         |
| RIB1  | 15.5397    | Brain_astrocyte      |
| RIB1  | 19.17753   | Placenta             |
| RIB1  | 23.55038   | White_Blood_Cells    |
| RIB1  | 24.15088   | Thyroid              |
| RIB1  | 24.18865   | Colon                |
| RIB1  | 24.53882   | Stomach              |
| RIB1  | 26.40664   | Prostate             |
| RIB1  | 27.055     | Lung                 |
| RIB1  | 29.6587    | Muscle               |
| RIB1  | 33.17853   | Liver                |
| RIB1  | 33.7968    | Vascular_endothelium |
| RIB1  | 35.3752    | stem_cell            |
| RIB1  | 3.96944    | Brain_cerebellum     |
| RIB1  | 40.93282   | Heart                |
| RIB1  | 47.51351   | Breast               |
| RIB1  | 6.98503    | Eye                  |
| RPL12 | 120.433    | Brain_astrocyte      |
| RPL12 | 129.897    | Muscle               |
| RPL12 | 149.676    | Spinal_cord          |
| RPL12 | 151.692    | Heart                |
| RPL12 | 160.656    | Eye                  |

©2009 Landes Bioscience.  
Do not distribute.

*Supplementary file 7*

| <u>RBPs</u> | <u>Tag freque</u> | <u>Tissue</u>        |
|-------------|-------------------|----------------------|
| RPL12       | 194.685           | White_Blood_Cells    |
| RPL12       | 236.732           | Lung                 |
| RPL12       | 309.825           | Vascular_endothelium |
| RPL12       | 318.154           | Placenta             |
| RPL12       | 371.255           | Breast               |
| RPL12       | 40.3145           | Colon                |
| RPL12       | 452.606           | Stomach              |
| RPL12       | 469.216           | Thyroid              |
| RPL12       | 54.1558           | Brain_cortex         |
| RPL12       | 542.443           | Prostate             |
| RPL12       | 556.158           | stem_cell            |
| RPL12       | 63.511            | Brain_cerebellum     |
| RPL12       | 90.4868           | Liver                |
| RPL12       | 93.8637           | Retina               |
| RPL13       | 102.2177          | Spinal_cord          |
| RPL13       | 106.9537          | Thyroid              |
| RPL13       | 1086.816          | Vascular_endothelium |
| RPL13       | 124.975           | Colon                |
| RPL13       | 126.6817          | Liver                |
| RPL13       | 158.9157          | Heart                |
| RPL13       | 174.6547          | Brain_cerebellum     |
| RPL13       | 179.1387          | White_Blood_Cells    |
| RPL13       | 225.4593          | Lung                 |
| RPL13       | 239.8312          | Brain_cortex         |
| RPL13       | 248.6358          | Brain_astrocyte      |
| RPL13       | 250.9387          | Placenta             |
| RPL13       | 307.737           | Muscle               |
| RPL13       | 341.305           | stem_cell            |
| RPL13       | 381.7162          | Stomach              |
| RPL13       | 637.9665          | Eye                  |
| RPL13       | 771.9887          | Prostate             |
| RPL13       | 87.4196           | Retina               |
| RPL13       | 878.9986          | Breast               |
| RPL18       | 100.175           | stem_cell            |
| RPL18       | 126.703           | Breast               |
| RPL18       | 18.0367           | Lung                 |
| RPL18       | 224.796           | Prostate             |
| RPL18       | 24.0781           | Heart                |
| RPL18       | 24.1887           | Colon                |
| RPL18       | 25.8759           | Thyroid              |
| RPL18       | 27.1945           | Brain_astrocyte      |
| RPL18       | 31.3673           | Placenta             |
| RPL18       | 31.7555           | Brain_cerebellum     |
| RPL18       | 32.8557           | Spinal_cord          |
| RPL18       | 6.03245           | Liver                |
| RPL18       | 67.9168           | Brain_cortex         |
| RPL18       | 7.59648           | Retina               |
| RPL18       | 88.0343           | White_Blood_Cells    |
| RPL18       | 93.1337           | Eye                  |
| RPL18       | 94.2145           | Vascular_endothelium |
| RPL18       | 96.4946           | Muscle               |
| RPL22       | 129.0307          | Breast               |

© 2009 Landes Bioscience.  
Do not distribute.

*Supplementary file 7*

| RBPs  | Tag freque | Tissue               |
|-------|------------|----------------------|
| RPL22 | 146.5563   | Vascular_endothelium |
| RPL22 | 15.08113   | Liver                |
| RPL22 | 186.9302   | White_Blood_Cells    |
| RPL22 | 192.4234   | Prostate             |
| RPL22 | 20.1572    | Colon                |
| RPL22 | 21.89755   | Retina               |
| RPL22 | 33.11432   | Placenta             |
| RPL22 | 35.72487   | Brain_cerebellum     |
| RPL22 | 357.6104   | stem_cell            |
| RPL22 | 36.07345   | Lung                 |
| RPL22 | 36.5063    | Spinal_cord          |
| RPL22 | 38.52501   | Heart                |
| RPL22 | 65.437     | Stomach              |
| RPL22 | 74.2266    | Muscle               |
| RPL22 | 78.5288    | Brain_cortex         |
| RPL22 | 79.16369   | Eye                  |
| RPL22 | 86.253     | Thyroid              |
| RPL22 | 97.12326   | Brain_astrocyte      |
| RPL28 | 3.12217    | Prostate             |
| RPL28 | 3.66613    | stem_cell            |
| RPL28 | 3.72675    | Retina               |
| RPL28 | 3.87282    | Vascular_endothelium |
| RPL28 | 3.96944    | Brain_cerebellum     |
| RPL28 | 6.99032    | Breast               |
| RPL28 | 8.00312    | White_Blood_Cells    |
| RPL34 | 100.098    | Muscle               |
| RPL34 | 102.5517   | Liver                |
| RPL34 | 130.9914   | Brain_cerebellum     |
| RPL34 | 16.1258    | Colon                |
| RPL34 | 164.279    | Spinal_cord          |
| RPL34 | 173.362    | Heart                |
| RPL34 | 174.761    | Placenta             |
| RPL34 | 181.6103   | Eye                  |
| RPL34 | 204.8186   | White_Blood_Cells    |
| RPL34 | 261.5322   | Lung                 |
| RPL34 | 263.352    | Vascular_endothelium |
| RPL34 | 294.466    | Stomach              |
| RPL34 | 301.378    | stem_cell            |
| RPL34 | 379.5131   | Thyroid              |
| RPL34 | 395.4236   | Breast               |
| RPL34 | 46.6191    | Brain_astrocyte      |
| RPL34 | 479.6423   | Prostate             |
| RPL34 | 58.8727    | Retina               |
| RPL34 | 95.4174    | Brain_cortex         |
| RPL3L | 7.22343    | Heart                |
| RPL3L | 77.938     | Muscle               |
| RPLP2 | 108.849    | Colon                |
| RPLP2 | 1198.91    | stem_cell            |
| RPLP2 | 127.022    | Brain_cerebellum     |
| RPLP2 | 1374.19    | Prostate             |
| RPLP2 | 1883.78    | Breast               |
| RPLP2 | 223.201    | Liver                |

©2009 Landes Bioscience.  
Do not distribute.



*Supplementary file 7*

| RBPs   | Tag freque | Tissue               |
|--------|------------|----------------------|
| RPLP2  | 225.995    | Retina               |
| RPLP2  | 273.789    | Brain_cortex         |
| RPLP2  | 306.653    | Spinal_cord          |
| RPLP2  | 318.831    | Muscle               |
| RPLP2  | 321.311    | Eye                  |
| RPLP2  | 426.09     | Thyroid              |
| RPLP2  | 445.445    | Heart                |
| RPLP2  | 485.616    | Brain_astrocyte      |
| RPLP2  | 542.194    | Vascular_endothelium |
| RPLP2  | 616.198    | Stomach              |
| RPLP2  | 635.794    | Lung                 |
| RPLP2  | 710.245    | Placenta             |
| RPLP2  | 902.926    | White_Blood_Cells    |
| MRPL3  | 10.1623    | Placenta             |
| MRPL3  | 11.6548    | Brain_astrocyte      |
| MRPL3  | 11.9083    | Brain_cerebellum     |
| MRPL3  | 15.0811    | Liver                |
| MRPL3  | 15.488     | White_Blood_Cells    |
| MRPL3  | 15.4913    | Vascular_endothelium |
| MRPL3  | 16.8547    | Heart                |
| MRPL3  | 20.6253    | Breast               |
| MRPL3  | 21.4808    | Retina               |
| MRPL3  | 21.8123    | Stomach              |
| MRPL3  | 22.4258    | Thyroid              |
| MRPL3  | 27.8176    | Prostate             |
| MRPL3  | 36.1039    | Brain_cortex         |
| MRPL3  | 49.8091    | stem_cell            |
| MRPL3  | 6.98503    | Eye                  |
| MRPL3  | 7.42267    | Muscle               |
| MRPL3  | 9.01835    | Lung                 |
| MRPL12 | 12.0943    | Colon                |
| MRPL12 | 15.5397    | Brain_astrocyte      |
| MRPL12 | 15.7291    | White_Blood_Cells    |
| MRPL12 | 16.0126    | Brain_cortex         |
| MRPL12 | 16.6905    | Prostate             |
| MRPL12 | 17.4471    | Vascular_endothelium |
| MRPL12 | 24.0781    | Heart                |
| MRPL12 | 29.6587    | Muscle               |
| MRPL12 | 3.01623    | Liver                |
| MRPL12 | 3.95946    | Breast               |
| MRPL12 | 4.48104    | Placenta             |
| MRPL12 | 4.50918    | Lung                 |
| MRPL12 | 50.6487    | stem_cell            |
| MRPL12 | 7.93887    | Brain_cerebellum     |
| MRPL23 | 10.3504    | Thyroid              |
| MRPL23 | 10.612     | Brain_cortex         |
| MRPL23 | 11.8021    | Placenta             |
| MRPL23 | 12.0391    | Heart                |
| MRPL23 | 12.0649    | Liver                |
| MRPL23 | 16.1258    | Colon                |
| MRPL23 | 23.2369    | Vascular_endothelium |
| MRPL23 | 25.7131    | White_Blood_Cells    |

©2009 Landes Bioscience.  
Do not distribute.

Supplementary file 7

| RBPs     | Tag freque | Tissue               |
|----------|------------|----------------------|
| MRPL23   | 3.65063    | Spinal_cord          |
| MRPL23   | 3.72675    | Retina               |
| MRPL23   | 40.4879    | Prostate             |
| MRPL23   | 40.7808    | Muscle               |
| MRPL23   | 4.50918    | Lung                 |
| MRPL23   | 52.2423    | stem_cell            |
| MRPL23   | 7.76986    | Brain_astrocyte      |
| MRPL23   | 7.91891    | Breast               |
| MRPL23   | 7.93887    | Brain_cerebellum     |
| MRPL23   | 8.17962    | Stomach              |
| MRPL23   | 9.31337    | Eye                  |
| RNASEL   | 3.20251    | Brain_cortex         |
| RNASEL   | 3.45012    | Thyroid              |
| RNASEL   | 7.63235    | Retina               |
| RNASE1   | 10.0039    | White_Blood_Cells    |
| RNASE1   | 115.529    | Retina               |
| RNASE1   | 137.069    | Colon                |
| RNASE1   | 182.994    | Heart                |
| RNASE1   | 18.5367    | Muscle               |
| RNASE1   | 18.6267    | Eye                  |
| RNASE1   | 21.1136    | Liver                |
| RNASE1   | 239.201    | Vascular_endothelium |
| RNASE1   | 272.654    | Stomach              |
| RNASE1   | 281.824    | Lung                 |
| RNASE1   | 37.1139    | Prostate             |
| RNASE1   | 43.1265    | Thyroid              |
| RNASE1   | 48.8152    | Brain_cortex         |
| RNASE1   | 72.4575    | Breast               |
| RNASE1   | 7.93887    | Brain_cerebellum     |
| RNASE1   | 82.9925    | Placenta             |
| RNASE1   | 83.9646    | Spinal_cord          |
| RNH1     | 10.5146    | stem_cell            |
| RNH1     | 3.01623    | Liver                |
| RNH1     | 3.70734    | Muscle               |
| RNH1     | 4.00156    | White_Blood_Cells    |
| RNH1     | 4.48104    | Placenta             |
| RNH1     | 4.50918    | Lung                 |
| RNH1     | 6.24434    | Prostate             |
| RNH1     | 7.22343    | Heart                |
| HNRPA2B1 | 114.515    | Stomach              |
| HNRPA2B1 | 119.029    | Thyroid              |
| HNRPA2B1 | 199.378    | Breast               |
| HNRPA2B1 | 251.755    | stem_cell            |
| HNRPA2B1 | 31.0794    | Brain_astrocyte      |
| HNRPA2B1 | 32.2516    | Colon                |
| HNRPA2B1 | 32.5968    | Eye                  |
| HNRPA2B1 | 33.7399    | Prostate             |
| HNRPA2B1 | 38.525     | Heart                |
| HNRPA2B1 | 42.4989    | White_Blood_Cells    |
| HNRPA2B1 | 43.6638    | Brain_cerebellum     |
| HNRPA2B1 | 44.4881    | Muscle               |
| HNRPA2B1 | 53.1753    | Retina               |

©2009 Landes Bioscience.  
Do not distribute.

Supplementary file 7

| RBPs     | Tag freque | Tissue               |
|----------|------------|----------------------|
| HNRPA2B1 | 54.7595    | Spinal_cord          |
| HNRPA2B1 | 59.1571    | Vascular_endothelium |
| HNRPA2B1 | 63.3408    | Liver                |
| HNRPA2B1 | 71.1364    | Placenta             |
| HNRPA2B1 | 85.102     | Brain_cortex         |
| HNRPA2B1 | 96.9473    | Lung                 |
| HNRPA3   | 10.07284   | White_Blood_Cells    |
| HNRPA3   | 10.83456   | Breast               |
| HNRPA3   | 10.9519    | Spinal_cord          |
| HNRPA3   | 11.27294   | Lung                 |
| HNRPA3   | 12.07542   | Thyroid              |
| HNRPA3   | 12.0943    | Colon                |
| HNRPA3   | 13.40907   | Retina               |
| HNRPA3   | 13.6327    | Stomach              |
| HNRPA3   | 15.4323    | Vascular_endothelium |
| HNRPA3   | 15.87774   | Brain_cerebellum     |
| HNRPA3   | 16.86998   | Prostate             |
| HNRPA3   | 18.6267    | Eye                  |
| HNRPA3   | 28.15881   | stem_cell            |
| HNRPA3   | 32.02512   | Brain_cortex         |
| HNRPA3   | 3.71133    | Muscle               |
| HNRPA3   | 4.48104    | Placenta             |
| HNRPA3   | 6.03246    | Liver                |
| HNRPA3   | 7.76986    | Brain_astrocyte      |
| ROD1     | 3.93229    | White_Blood_Cells    |
| RPL18A   | 104.818    | Colon                |
| RPL18A   | 133.711    | Brain_cortex         |
| RPL18A   | 134.961    | Brain_cerebellum     |
| RPL18A   | 161.323    | Heart                |
| RPL18A   | 170.937    | Brain_astrocyte      |
| RPL18A   | 187.131    | Lung                 |
| RPL18A   | 237.808    | White_Blood_Cells    |
| RPL18A   | 251.859    | Thyroid              |
| RPL18A   | 337.368    | Muscle               |
| RPL18A   | 344.473    | Breast               |
| RPL18A   | 378.648    | Placenta             |
| RPL18A   | 407.46     | Eye                  |
| RPL18A   | 441.501    | Vascular_endothelium |
| RPL18A   | 458.614    | stem_cell            |
| RPL18A   | 54.7595    | Spinal_cord          |
| RPL18A   | 59.9839    | Stomach              |
| RPL18A   | 63.6932    | Retina               |
| RPL18A   | 684.92     | Prostate             |
| RPL18A   | 93.503     | Liver                |
| RPL7     | 3.12217    | Prostate             |
| RPL7     | 3.68956    | stem_cell            |
| RPL7     | 3.87282    | Vascular_endothelium |
| RPL7     | 3.95946    | Breast               |
| RPP29    | 10.9519    | Spinal_cord          |
| RPP29    | 12.0943    | Colon                |
| RPP29    | 12.81      | Brain_cortex         |
| RPP29    | 3.01623    | Liver                |

Landes Bioscience.  
Do not distribute.

*Supplementary file 7*

| RBPs   | Tag freque | Tissue               |
|--------|------------|----------------------|
| RPP29  | 3.71133    | Muscle               |
| RPP29  | 3.79824    | Retina               |
| RPP29  | 3.96944    | Brain_cerebellum     |
| RPP29  | 6.07128    | White_Blood_Cells    |
| RPP29  | 6.7749     | Placenta             |
| RPP29  | 6.90024    | Thyroid              |
| RPP29  | 6.99032    | Breast               |
| RPP29  | 7.22343    | Heart                |
| RPP29  | 7.74563    | Vascular_endothelium |
| RPP29  | 9.36651    | Prostate             |
| RPS17  | 11.1803    | Retina               |
| RPS17  | 19.4246    | Brain_astrocyte      |
| RPS17  | 21.1136    | Liver                |
| RPS17  | 216.536    | Eye                  |
| RPS17  | 245.486    | Breast               |
| RPS17  | 256.386    | White_Blood_Cells    |
| RPS17  | 340.033    | stem_cell            |
| RPS17  | 38.1716    | Stomach              |
| RPS17  | 38.2032    | Brain_cortex         |
| RPS17  | 40.157     | Spinal_cord          |
| RPS17  | 431.172    | Prostate             |
| RPS17  | 43.3406    | Heart                |
| RPS17  | 47.3464    | Lung                 |
| RPS17  | 48.2473    | Muscle               |
| RPS17  | 620.802    | Vascular_endothelium |
| RPS17  | 70.7275    | Thyroid              |
| RPS17  | 7.93887    | Brain_cerebellum     |
| RPS17  | 8.06289    | Colon                |
| RPS17  | 85.1398    | Placenta             |
| RPS3   | 103.806    | Muscle               |
| RPS3   | 106.954    | Thyroid              |
| RPS3   | 125.421    | Stomach              |
| RPS3   | 142.039    | Lung                 |
| RPS3   | 219.571    | Placenta             |
| RPS3   | 230.506    | Eye                  |
| RPS3   | 364.143    | White_Blood_Cells    |
| RPS3   | 389.446    | Prostate             |
| RPS3   | 39.69434   | Brain_cerebellum     |
| RPS3   | 42.2272    | Liver                |
| RPS3   | 455.337    | Breast               |
| RPS3   | 48.3773    | Colon                |
| RPS3   | 535.1141   | stem_cell            |
| RPS3   | 54.389     | Brain_astrocyte      |
| RPS3   | 551.7198   | Vascular_endothelium |
| RPS3   | 58.4101    | Spinal_cord          |
| RPS3   | 61.5496    | Brain_cortex         |
| RPS3   | 67.4187    | Heart                |
| RPS3   | 68.3683    | Retina               |
| RPS4Y1 | 106.154    | Prostate             |
| RPS4Y1 | 111.472    | White_Blood_Cells    |
| RPS4Y1 | 12.81      | Brain_cortex         |
| RPS4Y1 | 13.6696    | Retina               |

©2009 Landes Bioscience.  
Do not distribute.

*Supplementary file 7*

| RBPs   | Tag freque | Tissue               |
|--------|------------|----------------------|
| RPS4Y1 | 20.1572    | Colon                |
| RPS4Y1 | 29.6587    | Muscle               |
| RPS4Y1 | 31.5642    | Lung                 |
| RPS4Y1 | 33.7094    | Heart                |
| RPS4Y1 | 3.49516    | Breast               |
| RPS4Y1 | 3.65063    | Spinal_cord          |
| RPS4Y1 | 41.3073    | Placenta             |
| RPS4Y1 | 44.2385    | Eye                  |
| RPS4Y1 | 50.3466    | Vascular_endothelium |
| RPS4Y1 | 5.45308    | Stomach              |
| RPS4Y1 | 89.8201    | stem_cell            |
| RPS4Y1 | 9.04868    | Liver                |
| RPS5   | 102.946    | Breast               |
| RPS5   | 103.917    | Muscle               |
| RPS5   | 104.775    | Eye                  |
| RPS5   | 12.0649    | Liver                |
| RPS5   | 144.914    | White_Blood_Cells    |
| RPS5   | 15.6224    | Retina               |
| RPS5   | 157.024    | Vascular_endothelium |
| RPS5   | 21.9038    | Spinal_cord          |
| RPS5   | 24.1887    | Colon                |
| RPS5   | 27.0551    | Lung                 |
| RPS5   | 311.621    | stem_cell            |
| RPS5   | 359.05     | Prostate             |
| RPS5   | 39.6764    | Thyroid              |
| RPS5   | 42.7342    | Brain_astrocyte      |
| RPS5   | 44.5704    | Brain_cortex         |
| RPS5   | 46.3512    | Stomach              |
| RPS5   | 50.564     | Heart                |
| RPS5   | 55.5721    | Brain_cerebellum     |
| RPS5   | 80.6587    | Placenta             |
| RPS9   | 142.029    | Eye                  |
| RPS9   | 144.586    | Muscle               |
| RPS9   | 154.419    | Breast               |
| RPS9   | 160.8968   | Vascular_endothelium |
| RPS9   | 18.99124   | Retina               |
| RPS9   | 246.651    | Prostate             |
| RPS9   | 27.786     | Brain_cerebellum     |
| RPS9   | 32.8557    | Spinal_cord          |
| RPS9   | 36.19475   | Liver                |
| RPS9   | 402.0561   | White_Blood_Cells    |
| RPS9   | 40.5525    | Brain_cortex         |
| RPS9   | 40.9328    | Heart                |
| RPS9   | 46.6191    | Brain_astrocyte      |
| RPS9   | 47.34639   | Lung                 |
| RPS9   | 56.013     | Placenta             |
| RPS9   | 56.44025   | Colon                |
| RPS9   | 60.37706   | Thyroid              |
| RPS9   | 674.0737   | stem_cell            |
| MRPS15 | 12.0649    | Liver                |
| MRPS15 | 14.8453    | Muscle               |
| MRPS15 | 19.4723    | Prostate             |

© 2009 Landes Bioscience.  
Do not distribute.

Supplementary file 7

| RBPs   | Tag freque | Tissue               |
|--------|------------|----------------------|
| MRPS15 | 19.6614    | White_Blood_Cells    |
| MRPS15 | 25.6914    | stem_cell            |
| MRPS15 | 3.45012    | Thyroid              |
| MRPS15 | 3.65063    | Spinal_cord          |
| MRPS15 | 3.87282    | Vascular_endothelium |
| MRPS15 | 4.2448     | Brain_cortex         |
| MRPS15 | 4.50918    | Lung                 |
| MRPS15 | 4.81562    | Heart                |
| MRPS15 | 7.76986    | Brain_astrocyte      |
| RTCD1  | 13.9577    | Vascular_endothelium |
| RTCD1  | 19.4246    | Brain_astrocyte      |
| RTCD1  | 22.2945    | White_Blood_Cells    |
| RTCD1  | 3.20251    | Brain_cortex         |
| RTCD1  | 3.71133    | Muscle               |
| RTCD1  | 8.06289    | Colon                |
| RTCD1  | 9.2239     | stem_cell            |
| RTCD1  | 9.36651    | Prostate             |
| SNRP70 | 12.0943    | Colon                |
| SNRP70 | 15.7821    | Lung                 |
| SNRP70 | 15.8777    | Brain_cerebellum     |
| SNRP70 | 22.3605    | Retina               |
| SNRP70 | 23.3096    | Brain_astrocyte      |
| SNRP70 | 24.9774    | Prostate             |
| SNRP70 | 25.8366    | stem_cell            |
| SNRP70 | 3.01623    | Liver                |
| SNRP70 | 33.4392    | Placenta             |
| SNRP70 | 3.71133    | Muscle               |
| SNRP70 | 38.4468    | Breast               |
| SNRP70 | 48.8689    | Vascular_endothelium |
| SNRP70 | 50.3359    | White_Blood_Cells    |
| SNRP70 | 5.45308    | Stomach              |
| SNRP70 | 6.90024    | Thyroid              |
| SNRP70 | 7.30127    | Spinal_cord          |
| SNRP70 | 8.4896     | Brain_cortex         |
| SNRP70 | 9.31337    | Eye                  |
| SNRPB2 | 12.4887    | Prostate             |
| SNRPB2 | 13.9577    | Vascular_endothelium |
| SNRPB2 | 22.1374    | stem_cell            |
| SNRPB2 | 3.01623    | Liver                |
| SNRPB2 | 3.45012    | Thyroid              |
| SNRPB2 | 3.65063    | Spinal_cord          |
| SNRPB2 | 5.45308    | Stomach              |
| SNRPB2 | 6.70455    | Retina               |
| SNRPB2 | 6.76376    | Lung                 |
| SNRPB2 | 6.8751     | Breast               |
| SNRPB2 | 6.98503    | Eye                  |
| SNRPB2 | 7.93887    | Brain_cerebellum     |
| SNRPB2 | 8.09504    | White_Blood_Cells    |
| SAFB1  | 10.612     | Brain_cortex         |
| SAFB1  | 11.122     | Muscle               |
| SAFB1  | 17.3898    | Breast               |
| SAFB1  | 17.4471    | Vascular_endothelium |

©2009 Landes Bioscience.  
Do not distribute.

*Supplementary file 7*

| RBPs  | Tag freque | Tissue               |
|-------|------------|----------------------|
| SAFB1 | 18.5787    | White_Blood_Cells    |
| SAFB1 | 20.4526    | stem_cell            |
| SAFB1 | 20.9551    | Eye                  |
| SAFB1 | 3.01623    | Liver                |
| SAFB1 | 3.65063    | Spinal_cord          |
| SAFB1 | 3.96944    | Brain_cerebellum     |
| SAFB1 | 5.45308    | Stomach              |
| SAFB1 | 5.69736    | Retina               |
| SAFB1 | 6.24434    | Prostate             |
| SAFB1 | 7.76986    | Brain_astrocyte      |
| SAFB1 | 7.86805    | Placenta             |
| SAFB1 | 9.01835    | Lung                 |
| SAFB2 | 10.122     | Prostate             |
| SAFB2 | 10.54469   | stem_cell            |
| SAFB2 | 10.9519    | Spinal_cord          |
| SAFB2 | 12.81      | Brain_cortex         |
| SAFB2 | 13.5275    | Lung                 |
| SAFB2 | 13.7502    | Breast               |
| SAFB2 | 17.51883   | Vascular_endothelium |
| SAFB2 | 27.26414   | Retina               |
| SAFB2 | 4.65668    | Eye                  |
| SAFB2 | 5.45308    | Stomach              |
| SAFB2 | 5.90104    | Placenta             |
| SAFB2 | 6.03245    | Liver                |
| SAFB2 | 7.22343    | Heart                |
| SAFB2 | 7.34659    | White_Blood_Cells    |
| SAFB2 | 8.06289    | Colon                |
| SAFB2 | 8.6253     | Thyroid              |
| SAM68 | 10.9519    | Spinal_cord          |
| SAM68 | 11.6548    | Brain_astrocyte      |
| SAM68 | 12.0943    | Colon                |
| SAM68 | 13.9701    | Eye                  |
| SAM68 | 14.4469    | Heart                |
| SAM68 | 15.0811    | Liver                |
| SAM68 | 18.007     | White_Blood_Cells    |
| SAM68 | 19.3641    | Vascular_endothelium |
| SAM68 | 24.0628    | Breast               |
| SAM68 | 24.5389    | Stomach              |
| SAM68 | 25.8759    | Thyroid              |
| SAM68 | 30.487     | Placenta             |
| SAM68 | 30.9462    | Brain_cortex         |
| SAM68 | 33.8188    | Lung                 |
| SAM68 | 3.70734    | Muscle               |
| SAM68 | 37.1139    | Prostate             |
| SAM68 | 45.5788    | Retina               |
| SAM68 | 47.6332    | Brain_cerebellum     |
| SAM68 | 64.0995    | stem_cell            |
| SART3 | 10.9062    | Stomach              |
| SART3 | 3.20251    | Brain_cortex         |
| SART3 | 3.49516    | Breast               |
| SART3 | 6.24434    | Prostate             |
| SART3 | 7.74563    | Vascular_endothelium |

©2009 Landes Bioscience.  
 Do not distribute.

*Supplementary file 7*

| RBPs   | Tag freque | Tissue               |
|--------|------------|----------------------|
| SCAND1 | 10.3126    | Breast               |
| SCAND1 | 11.9083    | Brain_cerebellum     |
| SCAND1 | 12.0649    | Liver                |
| SCAND1 | 19.0858    | Stomach              |
| SCAND1 | 21.9038    | Spinal_cord          |
| SCAND1 | 22.0184    | Placenta             |
| SCAND1 | 24.1508    | Thyroid              |
| SCAND1 | 24.8005    | Lung                 |
| SCAND1 | 26.8182    | Retina               |
| SCAND1 | 29.6907    | Muscle               |
| SCAND1 | 31.6127    | White_Blood_Cells    |
| SCAND1 | 36.0808    | Brain_cortex         |
| SCAND1 | 36.9064    | stem_cell            |
| SCAND1 | 37.2535    | Eye                  |
| SCAND1 | 37.466     | Prostate             |
| SCAND1 | 40.3145    | Colon                |
| SCAND1 | 74.5894    | Vascular_endothelium |
| SCAND1 | 7.76986    | Brain_astrocyte      |
| SF1    | 10.9519    | Spinal_cord          |
| SF1    | 12.0649    | Liver                |
| SF1    | 12.0943    | Colon                |
| SF1    | 18.0367    | Lung                 |
| SF1    | 18.5567    | Muscle               |
| SF1    | 18.9757    | Thyroid              |
| SF1    | 19.6701    | Placenta             |
| SF1    | 23.1484    | Vascular_endothelium |
| SF1    | 23.4336    | Retina               |
| SF1    | 24.5389    | Stomach              |
| SF1    | 26.3617    | stem_cell            |
| SF1    | 27.1945    | Brain_astrocyte      |
| SF1    | 27.9613    | Breast               |
| SF1    | 31.7555    | Brain_cerebellum     |
| SF1    | 34.3439    | Prostate             |
| SF1    | 44.8352    | Brain_cortex         |
| SF1    | 4.65669    | Eye                  |
| SF1    | 8.00312    | White_Blood_Cells    |
| SF1    | 9.63124    | Heart                |
| SF3B4  | 17.4758    | Breast               |
| SF3B4  | 20.2376    | White_Blood_Cells    |
| SF3B4  | 20.9551    | Eye                  |
| SF3B4  | 3.35227    | Retina               |
| SF3B4  | 3.45012    | Thyroid              |
| SF3B4  | 3.71133    | Muscle               |
| SF3B4  | 4.2448     | Brain_cortex         |
| SF3B4  | 5.08117    | Placenta             |
| SF3B4  | 7.30127    | Spinal_cord          |
| SF3B4  | 7.74563    | Vascular_endothelium |
| SF3B4  | 7.76986    | Brain_astrocyte      |
| SF3B4  | 8.06289    | Colon                |
| SF3B4  | 9.36651    | Prostate             |
| SF3B4  | 9.73933    | stem_cell            |
| SFPQ   | 12.0943    | Colon                |

©2009 Landes Bioscience.  
Do not distribute.



Supplementary file 7

| RBPs   | Tag freque | Tissue               |
|--------|------------|----------------------|
| SFPQ   | 12.81      | Brain_cortex         |
| SFPQ   | 13.9701    | Eye                  |
| SFPQ   | 15.7291    | White_Blood_Cells    |
| SFPQ   | 23.3096    | Brain_astrocyte      |
| SFPQ   | 25.7205    | Vascular_endothelium |
| SFPQ   | 31.4564    | Breast               |
| SFPQ   | 3.65063    | Spinal_cord          |
| SFPQ   | 3.79824    | Retina               |
| SFPQ   | 41.1027    | stem_cell            |
| SFPQ   | 6.72156    | Placenta             |
| SFPQ   | 6.76376    | Lung                 |
| SFPQ   | 7.93887    | Brain_cerebellum     |
| SFPQ   | 9.36651    | Prostate             |
| SFRS11 | 19.8472    | Brain_cerebellum     |
| SFRS11 | 3.01623    | Liver                |
| SFRS11 | 3.37399    | Prostate             |
| SFRS11 | 3.45012    | Thyroid              |
| SFRS11 | 5.1441     | Vascular_endothelium |
| SFRS11 | 5.7966     | Breast               |
| SFRS11 | 7.33225    | stem_cell            |
| SFRS11 | 9.87898    | White_Blood_Cells    |
| SFRS12 | 10.4683    | Vascular_endothelium |
| SFRS12 | 13.9806    | Breast               |
| SFRS12 | 15.17547   | White_Blood_Cells    |
| SFRS12 | 15.53973   | Brain_astrocyte      |
| SFRS12 | 3.12217    | Prostate             |
| SFRS12 | 3.20251    | Brain_cortex         |
| SFRS12 | 3.96944    | Brain_cerebellum     |
| SFRS12 | 4.65669    | Eye                  |
| SFRS12 | 7.30126    | Spinal_cord          |
| SFRS12 | 7.86805    | Placenta             |
| SFRS12 | 8.17962    | Stomach              |
| SFRS15 | 12.0943    | Colon                |
| SFRS15 | 3.35227    | Retina               |
| SFRS15 | 3.49516    | Breast               |
| SFRS15 | 3.50736    | Vascular_endothelium |
| SFRS15 | 3.71133    | Muscle               |
| SFRS15 | 3.87199    | White_Blood_Cells    |
| SFRS15 | 3.88493    | Brain_astrocyte      |
| SFRS15 | 6.23641    | stem_cell            |
| SFRS15 | 9.31337    | Eye                  |
| SFRS1  | 13.2938    | Retina               |
| SFRS1  | 13.496     | Prostate             |
| SFRS1  | 13.763     | White_Blood_Cells    |
| SFRS1  | 14.0294    | Vascular_endothelium |
| SFRS1  | 15.5397    | Brain_astrocyte      |
| SFRS1  | 15.8777    | Brain_cerebellum     |
| SFRS1  | 20.1572    | Colon                |
| SFRS1  | 22.918     | stem_cell            |
| SFRS1  | 31.6756    | Breast               |
| SFRS1  | 4.81562    | Heart                |
| SFRS1  | 6.03245    | Liver                |

Landes Bioscience.  
Do not distribute.

*Supplementary file 7*

| RBPs    | Tag freque | Tissue               |
|---------|------------|----------------------|
| SFRS1   | 6.40502    | Brain_cortex         |
| SFRS1   | 6.72156    | Placenta             |
| SFRS1   | 6.98503    | Eye                  |
| SFRS1   | 7.30127    | Spinal_cord          |
| SFRS1   | 7.41468    | Muscle               |
| SFRS1   | 8.6253     | Thyroid              |
| SFRPS2  | 11.122     | Muscle               |
| SFRPS2  | 14.4469    | Heart                |
| SFRPS2  | 18.0974    | Liver                |
| SFRPS2  | 23.1484    | Vascular_endothelium |
| SFRPS2  | 23.3096    | Brain_astrocyte      |
| SFRPS2  | 23.7096    | White_Blood_Cells    |
| SFRPS2  | 25.5544    | Spinal_cord          |
| SFRPS2  | 25.7885    | Brain_cortex         |
| SFRPS2  | 30.3659    | Prostate             |
| SFRPS2  | 32.7185    | Stomach              |
| SFRPS2  | 32.7761    | Thyroid              |
| SFRPS2  | 35.1504    | Retina               |
| SFRPS2  | 36.0734    | Lung                 |
| SFRPS2  | 3.96944    | Brain_cerebellum     |
| SFRPS2  | 4.03145    | Colon                |
| SFRPS2  | 45.7305    | Placenta             |
| SFRPS2  | 89.8473    | Breast               |
| SFRPS2  | 9.31337    | Eye                  |
| SFRPS2  | 94.9023    | stem_cell            |
| SFRPS2B | 10.3126    | Breast               |
| SFRPS2B | 12.4887    | Prostate             |
| SFRPS2B | 3.72675    | Retina               |
| SFRPS2B | 3.77056    | stem_cell            |
| SFRPS2B | 3.87199    | White_Blood_Cells    |
| SFRPS2B | 3.93403    | Placenta             |
| SFRPS2B | 3.96944    | Brain_cerebellum     |
| SFRPS2B | 4.50918    | Lung                 |
| SFRPS2B | 5.1577     | Brain_cortex         |
| SFRPS2B | 7.22343    | Heart                |
| SFRPS2B | 7.74563    | Vascular_endothelium |
| SFRPS2B | 8.6253     | Thyroid              |
| SFRPS3  | 11.122     | Muscle               |
| SFRPS3  | 11.9083    | Brain_cerebellum     |
| SFRPS3  | 197.7721   | stem_cell            |
| SFRPS3  | 27.146     | Liver                |
| SFRPS3  | 31.07946   | Brain_astrocyte      |
| SFRPS3  | 36.11712   | Heart                |
| SFRPS3  | 37.54008   | White_Blood_Cells    |
| SFRPS3  | 37.9824    | Retina               |
| SFRPS3  | 39.5818    | Eye                  |
| SFRPS3  | 4.03145    | Colon                |
| SFRPS3  | 44.85154   | Thyroid              |
| SFRPS3  | 45.48012   | Prostate             |
| SFRPS3  | 46.35124   | Stomach              |
| SFRPS3  | 46.4193    | Brain_cortex         |
| SFRPS3  | 47.4583    | Spinal_cord          |

©2009 Landes Bioscience.  
Do not distribute.

Supplementary file 7

| RBPs   | Tag freque | Tissue               |
|--------|------------|----------------------|
| SFRPS3 | 63.8337    | Vascular_endothelium |
| SFRPS3 | 67.6377    | Lung                 |
| SFRPS3 | 73.38002   | Placenta             |
| SFRPS3 | 99.891     | Breast               |
| SFRS4  | 10.122     | Prostate             |
| SFRS4  | 10.4855    | Breast               |
| SFRS4  | 11.8021    | Placenta             |
| SFRS4  | 23.232     | White_Blood_Cells    |
| SFRS4  | 25.6914    | stem_cell            |
| SFRS4  | 3.01623    | Liver                |
| SFRS4  | 3.88493    | Brain_astrocyte      |
| SFRS4  | 4.03145    | Colon                |
| SFRS4  | 7.30127    | Spinal_cord          |
| SFRS4  | 7.73655    | Brain_cortex         |
| SFRS4  | 7.74563    | Vascular_endothelium |
| SFRS4  | 8.17962    | Stomach              |
| SFRPS5 | 13.9701    | Eye                  |
| SFRPS5 | 15.2435    | Placenta             |
| SFRPS5 | 15.4731    | Brain_cortex         |
| SFRPS5 | 15.5397    | Brain_astrocyte      |
| SFRPS5 | 17.2506    | Thyroid              |
| SFRPS5 | 24.1887    | Colon                |
| SFRPS5 | 24.4661    | Breast               |
| SFRPS5 | 28.0995    | Prostate             |
| SFRPS5 | 28.2925    | Vascular_endothelium |
| SFRPS5 | 3.71133    | Muscle               |
| SFRPS5 | 4.50918    | Lung                 |
| SFRPS5 | 4.81562    | Heart                |
| SFRPS5 | 52.5924    | stem_cell            |
| SFRPS5 | 7.30127    | Spinal_cord          |
| SFRPS5 | 7.59648    | Retina               |
| SFRPS5 | 7.93887    | Brain_cerebellum     |
| SFRPS5 | 85.4621    | White_Blood_Cells    |
| SFRS6  | 12.0943    | Colon                |
| SFRS6  | 13.52749   | Lung                 |
| SFRS6  | 15.4731    | Brain_cortex         |
| SFRS6  | 15.68364   | Placenta             |
| SFRS6  | 18.6267    | Eye                  |
| SFRS6  | 18.97568   | Thyroid              |
| SFRS6  | 19.1018    | Vascular_endothelium |
| SFRS6  | 19.1804    | Breast               |
| SFRS6  | 19.43959   | White_Blood_Cells    |
| SFRS6  | 21.00558   | Retina               |
| SFRS6  | 21.55455   | stem_cell            |
| SFRS6  | 25.5544    | Spinal_cord          |
| SFRS6  | 27.19453   | Brain_astrocyte      |
| SFRS6  | 3.70734    | Muscle               |
| SFRS6  | 40.89808   | Stomach              |
| SFRS6  | 63.9543    | Prostate             |
| SFRS6  | 7.22343    | Heart                |
| SFRS6  | 9.04868    | Liver                |
| SFRS7  | 10.9519    | Spinal_cord          |

© 2009 Landes Bioscience.  
Do not distribute.

Supplementary file 7

| RBPs    | Tag freque | Tissue               |
|---------|------------|----------------------|
| SFRS7   | 11.65479   | Brain_astrocyte      |
| SFRS7   | 14.90923   | Breast               |
| SFRS7   | 15.86269   | Prostate             |
| SFRS7   | 28.29882   | Vascular_endothelium |
| SFRS7   | 3.01623    | Liver                |
| SFRS7   | 3.71133    | Muscle               |
| SFRS7   | 4.03145    | Colon                |
| SFRS7   | 4.48104    | Placenta             |
| SFRS7   | 45.7322    | White_Blood_Cells    |
| SFRS7   | 4.65669    | Eye                  |
| SFRS7   | 4.81562    | Heart                |
| SFRS7   | 5.1577     | Brain_cortex         |
| SFRS7   | 87.1501    | stem_cell            |
| SFRPS9  | 12.81      | Brain_cortex         |
| SFRPS9  | 13.9806    | Breast               |
| SFRPS9  | 15.488     | White_Blood_Cells    |
| SFRPS9  | 23.3096    | Brain_astrocyte      |
| SFRPS9  | 29.8506    | stem_cell            |
| SFRPS9  | 3.65063    | Spinal_cord          |
| SFRPS9  | 3.70734    | Muscle               |
| SFRPS9  | 3.72675    | Retina               |
| SFRPS9  | 4.03145    | Colon                |
| SFRPS9  | 46.4738    | Vascular_endothelium |
| SFRPS9  | 4.65669    | Eye                  |
| SFRPS9  | 6.03245    | Liver                |
| SFRPS9  | 62.4434    | Prostate             |
| SFRPS9  | 6.72156    | Placenta             |
| SFRPS9  | 6.90024    | Thyroid              |
| SFRPS9  | 7.93887    | Brain_cerebellum     |
| SFRPS9  | 9.01835    | Lung                 |
| SIAHBP1 | 10.122     | Prostate             |
| SIAHBP1 | 10.9519    | Spinal_cord          |
| SIAHBP1 | 11.6548    | Brain_astrocyte      |
| SIAHBP1 | 14.8294    | Muscle               |
| SIAHBP1 | 19.7973    | Breast               |
| SIAHBP1 | 19.8472    | Brain_cerebellum     |
| SIAHBP1 | 21.224     | Brain_cortex         |
| SIAHBP1 | 23.5187    | stem_cell            |
| SIAHBP1 | 28.0589    | Vascular_endothelium |
| SIAHBP1 | 34.9251    | Eye                  |
| SIAHBP1 | 4.03145    | Colon                |
| SIAHBP1 | 4.50918    | Lung                 |
| SIAHBP1 | 4.81562    | Heart                |
| SIAHBP1 | 5.08117    | Placenta             |
| SIAHBP1 | 5.89843    | White_Blood_Cells    |
| SLBP    | 11.2729    | Lung                 |
| SLBP    | 11.6185    | Vascular_endothelium |
| SLBP    | 12.0649    | Liver                |
| SLBP    | 13.9088    | Prostate             |
| SLBP    | 15.2435    | Placenta             |
| SLBP    | 15.4731    | Brain_cortex         |
| SLBP    | 16.4411    | stem_cell            |

©2009 Landes Bioscience.  
Do not distribute.

*Supplementary file 7*

| RBPs  | Tag freque | Tissue               |
|-------|------------|----------------------|
| SLBP  | 22.4258    | Thyroid              |
| SLBP  | 25.7131    | White_Blood_Cells    |
| SLBP  | 3.71133    | Muscle               |
| SLBP  | 3.88493    | Brain_astrocyte      |
| SLBP  | 3.96944    | Brain_cerebellum     |
| SLBP  | 5.45308    | Stomach              |
| SLBP  | 6.98503    | Eye                  |
| SLBP  | 7.30127    | Spinal_cord          |
| SLBP  | 8.6949     | Breast               |
| SLBP  | 9.764      | Retina               |
| SLTM  | 10.81721   | Breast               |
| SLTM  | 15.30822   | Retina               |
| SLTM  | 16.34963   | Vascular_endothelium |
| SLTM  | 16.86999   | Prostate             |
| SLTM  | 20.90583   | stem_cell            |
| SLTM  | 22.58026   | White_Blood_Cells    |
| SLTM  | 3.71133    | Muscle               |
| SLTM  | 3.88493    | Brain_astrocyte      |
| SLTM  | 3.93403    | Placenta             |
| SLTM  | 3.96944    | Brain_cerebellum     |
| SLTM  | 4.03145    | Colon                |
| SLTM  | 5.17518    | Thyroid              |
| SLTM  | 5.78136    | Brain_cortex         |
| SLTM  | 6.03245    | Liver                |
| SLTM  | 7.30127    | Spinal_cord          |
| SNRPA | 11.6185    | Vascular_endothelium |
| SNRPA | 12.0943    | Colon                |
| SNRPA | 19.36      | White_Blood_Cells    |
| SNRPA | 31.6341    | stem_cell            |
| SNRPA | 3.65063    | Spinal_cord          |
| SNRPA | 3.93403    | Placenta             |
| SNRPA | 5.8584     | Retina               |
| SNRPA | 6.8751     | Breast               |
| SNRPA | 7.42267    | Muscle               |
| SNRPA | 7.76986    | Brain_astrocyte      |
| SNRPA | 7.93887    | Brain_cerebellum     |
| SNRPA | 8.36622    | Prostate             |
| SNRPA | 9.31337    | Eye                  |
| SNRPA | 9.60753    | Brain_cortex         |
| SON   | 12.03905   | Heart                |
| SON   | 12.0649    | Liver                |
| SON   | 16.12578   | Colon                |
| SON   | 18.67561   | Brain_cortex         |
| SON   | 19.42466   | Brain_astrocyte      |
| SON   | 19.84717   | Brain_cerebellum     |
| SON   | 19.99207   | Prostate             |
| SON   | 22.26797   | Muscle               |
| SON   | 23.46587   | Retina               |
| SON   | 24.8005    | Lung                 |
| SON   | 27.96132   | Breast               |
| SON   | 29.20503   | Spinal_cord          |
| SON   | 29.32606   | Thyroid              |

©2009 Landes Bioscience.  
Do not distribute.

*Supplementary file 7*

| RBPs  | Tag freque | Tissue               |
|-------|------------|----------------------|
| SON   | 29.99194   | Stomach              |
| SON   | 31.35254   | White_Blood_Cells    |
| SON   | 35.0578    | stem_cell            |
| SON   | 36.36883   | Vascular_endothelium |
| SON   | 37.80872   | Placenta             |
| SON   | 6.98503    | Eye                  |
| SPF45 | 10.122     | Prostate             |
| SPF45 | 10.2882    | Vascular_endothelium |
| SPF45 | 11.0199    | White_Blood_Cells    |
| SPF45 | 11.6417    | Eye                  |
| SPF45 | 13.5498    | Placenta             |
| SPF45 | 13.6327    | Stomach              |
| SPF45 | 18.0367    | Lung                 |
| SPF45 | 20.6253    | Breast               |
| SPF45 | 26.2962    | stem_cell            |
| SPF45 | 3.20251    | Brain_cortex         |
| SPF45 | 3.71133    | Muscle               |
| SPF45 | 3.88493    | Brain_astrocyte      |
| SPF45 | 3.96944    | Brain_cerebellum     |
| SPF45 | 4.81562    | Heart                |
| SPF45 | 5.17518    | Thyroid              |
| SPF45 | 6.03245    | Liver                |
| SPF45 | 6.70455    | Retina               |
| SPF45 | 7.30127    | Spinal_cord          |
| SR140 | 10.9519    | Spinal_cord          |
| SR140 | 11.23507   | Vascular_endothelium |
| SR140 | 11.65479   | Brain_astrocyte      |
| SR140 | 17.07657   | stem_cell            |
| SR140 | 18.71774   | White_Blood_Cells    |
| SR140 | 3.01623    | Liver                |
| SR140 | 3.70734    | Muscle               |
| SR140 | 3.93403    | Placenta             |
| SR140 | 5.17518    | Thyroid              |
| SR140 | 6.16273    | Prostate             |
| SR140 | 6.40502    | Brain_cortex         |
| SR140 | 7.91891    | Breast               |
| SR140 | 8.65735    | Retina               |
| SRP14 | 103.498    | Retina               |
| SRP14 | 112.037    | stem_cell            |
| SRP14 | 126.364    | Brain_cortex         |
| SRP14 | 16.2984    | Eye                  |
| SRP14 | 170.113    | Prostate             |
| SRP14 | 25.9793    | Muscle               |
| SRP14 | 31.7555    | Brain_cerebellum     |
| SRP14 | 34.8479    | White_Blood_Cells    |
| SRP14 | 38.8493    | Brain_astrocyte      |
| SRP14 | 42.601     | Vascular_endothelium |
| SRP14 | 55.8929    | Placenta             |
| SRP14 | 62.7105    | Stomach              |
| SRP14 | 66.357     | Liver                |
| SRP14 | 69.5592    | Breast               |
| SRP14 | 8.06289    | Colon                |

Supplementary file 7

| RBPs   | Tag freque | Tissue               |
|--------|------------|----------------------|
| SRP14  | 93.1532    | Thyroid              |
| SRP14  | 96.3124    | Heart                |
| SRP14  | 98.5671    | Spinal_cord          |
| SRP14  | 99.2019    | Lung                 |
| SRP68  | 12.31149   | Prostate             |
| SRP68  | 13.92305   | Breast               |
| SRP68  | 16.44334   | stem_cell            |
| SRP68  | 18.09733   | Liver                |
| SRP68  | 3.65063    | Spinal_cord          |
| SRP68  | 3.71133    | Muscle               |
| SRP68  | 6.90024    | Thyroid              |
| SRP68  | 6.97885    | Vascular_endothelium |
| SRP68  | 7.59648    | Retina               |
| SRP68  | 7.76986    | Brain_astrocyte      |
| SRP68  | 8.06289    | Colon                |
| SRP68  | 9.37035    | White_Blood_Cells    |
| SRP68  | 9.60753    | Brain_cortex         |
| SRP72  | 11.0199    | White_Blood_Cells    |
| SRP72  | 11.6548    | Brain_astrocyte      |
| SRP72  | 27.1097    | Vascular_endothelium |
| SRP72  | 3.49516    | Breast               |
| SRP72  | 6.24434    | Prostate             |
| SRP72  | 6.33195    | stem_cell            |
| SRP72  | 6.40502    | Brain_cortex         |
| SRP72  | 7.42267    | Muscle               |
| SRrp35 | 3.37399    | Prostate             |
| SRrp35 | 3.48943    | Vascular_endothelium |
| STAU1  | 11.2729    | Lung                 |
| STAU1  | 12.8602    | Vascular_endothelium |
| STAU1  | 13.8005    | Thyroid              |
| STAU1  | 15.0811    | Liver                |
| STAU1  | 15.4731    | Brain_cortex         |
| STAU1  | 16.9372    | Placenta             |
| STAU1  | 17.0921    | Retina               |
| STAU1  | 18.8267    | stem_cell            |
| STAU1  | 19.0858    | Stomach              |
| STAU1  | 20.971     | Breast               |
| STAU1  | 23.6179    | Prostate             |
| STAU1  | 29.2051    | Spinal_cord          |
| STAU1  | 4.65669    | Eye                  |
| STAU1  | 7.93887    | Brain_cerebellum     |
| STAU1  | 8.06289    | Colon                |
| STAU1  | 8.09504    | White_Blood_Cells    |
| STAU2  | 11.60944   | Retina               |
| STAU2  | 12.29343   | stem_cell            |
| STAU2  | 14.8453    | Muscle               |
| STAU2  | 15.5397    | Brain_astrocyte      |
| STAU2  | 26.6246    | Brain_cortex         |
| STAU2  | 3.01623    | Liver                |
| STAU2  | 3.65063    | Spinal_cord          |
| STAU2  | 3.87282    | Vascular_endothelium |
| STAU2  | 3.96944    | Brain_cerebellum     |

*Supplementary file 7*

| RBPs    | Tag freque | Tissue               |
|---------|------------|----------------------|
| STAU2   | 4.50918    | Lung                 |
| STAU2   | 4.65669    | Eye                  |
| STAU2   | 5.17518    | Thyroid              |
| STAU2   | 7.86805    | Placenta             |
| STAU2   | 7.91892    | Breast               |
| STAU2   | 8.68568    | Prostate             |
| STAU2   | 9.63124    | Heart                |
| STRBP   | 15.4148    | stem_cell            |
| STRBP   | 3.50736    | Vascular_endothelium |
| STRBP   | 7.43149    | White_Blood_Cells    |
| SUPV3L1 | 3.01623    | Liver                |
| SUPV3L1 | 4.03145    | Colon                |
| SUPV3L1 | 5.1577     | Brain_cortex         |
| SUPV3L1 | 5.27235    | stem_cell            |
| SUPV3L1 | 6.74798    | Prostate             |
| SUPV3L1 | 6.98503    | Eye                  |
| SUPV3L1 | 6.99032    | Breast               |
| SUPV3L1 | 7.74398    | White_Blood_Cells    |
| SURF6   | 3.01623    | Liver                |
| SURF6   | 3.37399    | Prostate             |
| SURF6   | 3.45012    | Thyroid              |
| SURF6   | 3.49516    | Breast               |
| SURF6   | 3.88493    | Brain_astrocyte      |
| SURF6   | 5.49919    | stem_cell            |
| SURF6   | 7.74398    | White_Blood_Cells    |
| GARS    | 104.893    | Brain_astrocyte      |
| GARS    | 11.134     | Muscle               |
| GARS    | 11.2729    | Lung                 |
| GARS    | 11.9083    | Brain_cerebellum     |
| GARS    | 15.7361    | Placenta             |
| GARS    | 19.36      | White_Blood_Cells    |
| GARS    | 19.528     | Retina               |
| GARS    | 32.0251    | Brain_cortex         |
| GARS    | 3.45012    | Thyroid              |
| GARS    | 34.9251    | Eye                  |
| GARS    | 37.466     | Prostate             |
| GARS    | 4.03145    | Colon                |
| GARS    | 45.4371    | Breast               |
| GARS    | 49.9147    | stem_cell            |
| GARS    | 55.8308    | Vascular_endothelium |
| GARS    | 68.1635    | Stomach              |
| GARS    | 7.22343    | Heart                |
| GARS    | 7.30127    | Spinal_cord          |
| HARS    | 10.122     | Prostate             |
| HARS    | 11.134     | Muscle               |
| HARS    | 17.5368    | Vascular_endothelium |
| HARS    | 18.5787    | White_Blood_Cells    |
| HARS    | 19.4246    | Brain_astrocyte      |
| HARS    | 19.8472    | Brain_cerebellum     |
| HARS    | 22.4176    | Brain_cortex         |
| HARS    | 3.01623    | Liver                |
| HARS    | 3.38745    | Placenta             |

© 2009 Landes Bioscience.  
Do not distribute.



Supplementary file 7

| RBPs  | Tag freque | Tissue               |
|-------|------------|----------------------|
| HARS  | 3.49516    | Breast               |
| HARS  | 8.07443    | stem_cell            |
| MARS  | 11.0199    | White_Blood_Cells    |
| MARS  | 15.5397    | Brain_astrocyte      |
| MARS  | 15.8378    | Breast               |
| MARS  | 17.4471    | Vascular_endothelium |
| MARS  | 21.0802    | stem_cell            |
| MARS  | 3.35227    | Retina               |
| MARS  | 3.65063    | Spinal_cord          |
| MARS  | 3.96944    | Brain_cerebellum     |
| MARS  | 4.03145    | Colon                |
| MARS  | 6.40502    | Brain_cortex         |
| MARS  | 7.41468    | Muscle               |
| MARS  | 9.31337    | Eye                  |
| MARS  | 9.36651    | Prostate             |
| SYNJ2 | 11.8561    | Placenta             |
| SYNJ2 | 21.9038    | Spinal_cord          |
| SYNJ2 | 3.6733     | White_Blood_Cells    |
| SYNJ2 | 3.87282    | Vascular_endothelium |
| SYNJ2 | 3.9056     | Retina               |
| SYNJ2 | 5.7966     | Breast               |
| SYNJ2 | 6.40502    | Brain_cortex         |
| SYNJ2 | 6.90024    | Thyroid              |
| SYNJ2 | 7.76986    | Brain_astrocyte      |
| SYWC  | 108.7294   | Vascular_endothelium |
| SYWC  | 11.134     | Muscle               |
| SYWC  | 11.6417    | Eye                  |
| SYWC  | 11.87837   | Breast               |
| SYWC  | 12.0943    | Colon                |
| SYWC  | 122.4993   | White_Blood_Cells    |
| SYWC  | 14.44686   | Heart                |
| SYWC  | 14.60253   | Spinal_cord          |
| SYWC  | 22.0664    | Retina               |
| SYWC  | 24.5389    | Stomach              |
| SYWC  | 29.33818   | stem_cell            |
| SYWC  | 32.91611   | Brain_cortex         |
| SYWC  | 37.95134   | Thyroid              |
| SYWC  | 38.9557    | Placenta             |
| SYWC  | 50.50403   | Brain_astrocyte      |
| SYWC  | 76.656     | Lung                 |
| SYWC  | 8.36622    | Prostate             |
| TACC1 | 10.0039    | White_Blood_Cells    |
| TACC1 | 16.8547    | Heart                |
| TACC1 | 17.1877    | Breast               |
| TACC1 | 21.8123    | Stomach              |
| TACC1 | 22.1374    | stem_cell            |
| TACC1 | 22.3605    | Retina               |
| TACC1 | 24.1887    | Colon                |
| TACC1 | 3.01623    | Liver                |
| TACC1 | 31.5662    | Vascular_endothelium |
| TACC1 | 46.5766    | Thyroid              |
| TACC1 | 57.0434    | Placenta             |

Landes Bioscience.  
Do not distribute.

*Supplementary file 7*

| RBPs   | Tag freque | Tissue               |
|--------|------------|----------------------|
| TACC1  | 58.6193    | Lung                 |
| TACC1  | 62.0608    | Spinal_cord          |
| TACC1  | 64.4712    | Brain_cortex         |
| TACC1  | 67.4798    | Prostate             |
| TACC1  | 6.98503    | Eye                  |
| TACC1  | 7.42267    | Muscle               |
| TACC1  | 7.93887    | Brain_cerebellum     |
| TACC2  | 15.2435    | Placenta             |
| TACC2  | 3.72675    | Retina               |
| TACC2  | 3.95946    | Breast               |
| TACC2  | 8.06289    | Colon                |
| TARDBP | 12.8602    | Vascular_endothelium |
| TARDBP | 13.4431    | Placenta             |
| TARDBP | 15.52552   | Thyroid              |
| TARDBP | 15.8777    | Brain_cerebellum     |
| TARDBP | 16.86999   | Prostate             |
| TARDBP | 18.6267    | Eye                  |
| TARDBP | 20.97096   | Breast               |
| TARDBP | 24.42651   | Brain_cortex         |
| TARDBP | 24.53884   | Stomach              |
| TARDBP | 31.0794    | Brain_astrocyte      |
| TARDBP | 34.3792    | White_Blood_Cells    |
| TARDBP | 3.71133    | Muscle               |
| TARDBP | 51.70272   | stem_cell            |
| TARDBP | 5.69736    | Retina               |
| TARDBP | 7.22343    | Heart                |
| TARDBP | 9.01835    | Lung                 |
| TARB1  | 11.8021    | Placenta             |
| TARB1  | 11.9083    | Brain_cerebellum     |
| TARB1  | 15.4731    | Brain_cortex         |
| TARB1  | 3.37399    | Prostate             |
| TARB1  | 3.65063    | Spinal_cord          |
| TARB1  | 3.95946    | Breast               |
| TARB1  | 5.1441     | Vascular_endothelium |
| TARB1  | 6.59044    | stem_cell            |
| TARB1  | 7.74398    | White_Blood_Cells    |
| TARB1  | 9.764      | Retina               |
| TDRKH  | 15.6836    | Placenta             |
| TDRKH  | 3.20251    | Brain_cortex         |
| TDRKH  | 3.72675    | Retina               |
| TEP1   | 10.122     | Prostate             |
| TEP1   | 10.9062    | Stomach              |
| TEP1   | 3.65063    | Spinal_cord          |
| TEP1   | 3.71133    | Muscle               |
| TEP1   | 3.79824    | Retina               |
| TEP1   | 3.88493    | Brain_astrocyte      |
| TEP1   | 6.99032    | Breast               |
| TEP1   | 8.00312    | White_Blood_Cells    |
| THOC4  | 10.909     | stem_cell            |
| THOC4  | 11.5932    | Breast               |
| THOC4  | 13.9088    | Prostate             |
| THOC4  | 3.48943    | Vascular_endothelium |

© 2009 Landes Bioscience.  
Do not distribute.

*Supplementary file 7*

| RBPs   | Tag freque | Tissue               |
|--------|------------|----------------------|
| THOC4  | 3.70734    | Muscle               |
| THOC4  | 3.87199    | White_Blood_Cells    |
| THOC4  | 4.03145    | Colon                |
| THOC4  | 4.2448     | Brain_cortex         |
| THOC4  | 4.65669    | Eye                  |
| THOC4  | 5.08117    | Placenta             |
| THOC4  | 5.8584     | Retina               |
| THOC4  | 7.76986    | Brain_astrocyte      |
| TIA1   | 10.1623    | Placenta             |
| TIA1   | 10.5221    | Vascular_endothelium |
| TIA1   | 11.127     | Prostate             |
| TIA1   | 13.45185   | stem_cell            |
| TIA1   | 14.6025    | Spinal_cord          |
| TIA1   | 17.39635   | Retina               |
| TIA1   | 3.43755    | Breast               |
| TIA1   | 3.70734    | Muscle               |
| TIA1   | 3.88493    | Brain_astrocyte      |
| TIA1   | 3.96944    | Brain_cerebellum     |
| TIA1   | 6.90024    | Thyroid              |
| TIA1   | 7.74398    | White_Blood_Cells    |
| TIAR   | 14.6025    | Spinal_cord          |
| TIAR   | 15.4323    | Vascular_endothelium |
| TIAR   | 17.0548    | Brain_cortex         |
| TIAR   | 17.5752    | Retina               |
| TIAR   | 17.70966   | Breast               |
| TIAR   | 20.7007    | Thyroid              |
| TIAR   | 22.2541    | Prostate             |
| TIAR   | 22.29445   | White_Blood_Cells    |
| TIAR   | 22.54589   | Lung                 |
| TIAR   | 31.27516   | stem_cell            |
| TIAR   | 4.81562    | Heart                |
| TIAR   | 51.08501   | Placenta             |
| TIAR   | 5.45308    | Stomach              |
| TIAR   | 6.03245    | Liver                |
| TIAR   | 7.42267    | Muscle               |
| TIAR   | 7.76986    | Brain_astrocyte      |
| TIAR   | 7.93888    | Brain_cerebellum     |
| TNRC6A | 11.1803    | Retina               |
| TNRC6A | 11.6185    | Vascular_endothelium |
| TNRC6A | 21.9038    | Spinal_cord          |
| TNRC6A | 3.37399    | Prostate             |
| TNRC6A | 3.45012    | Thyroid              |
| TNRC6A | 3.49516    | Breast               |
| TNRC6A | 3.71133    | Muscle               |
| TNRC6A | 3.88493    | Brain_astrocyte      |
| TNRC6A | 6.03245    | Liver                |
| TNRC6A | 6.40502    | Brain_cortex         |
| TNRC6A | 6.98503    | Eye                  |
| TNRC6A | 7.93887    | Brain_cerebellum     |
| TNRC6A | 8.46862    | Placenta             |
| TNRC6A | 9.22661    | stem_cell            |
| TNRC6C | 3.49516    | Breast               |

©2009 Landes Bioscience.  
Do not distribute.

*Supplementary file 7*

| RBPs    | Tag freque | Tissue               |
|---------|------------|----------------------|
| TNRC4   | 3.79824    | Retina               |
| TNRC4   | 8.4896     | Brain_cortex         |
| TRA2A   | 10.5221    | Vascular_endothelium |
| TRA2A   | 10.9062    | Stomach              |
| TRA2A   | 11.1472    | White_Blood_Cells    |
| TRA2A   | 12.0754    | Thyroid              |
| TRA2A   | 12.4887    | Prostate             |
| TRA2A   | 13.5275    | Lung                 |
| TRA2A   | 15.2435    | Placenta             |
| TRA2A   | 20.6308    | Brain_cortex         |
| TRA2A   | 21.0894    | stem_cell            |
| TRA2A   | 25.5544    | Spinal_cord          |
| TRA2A   | 31.4564    | Breast               |
| TRA2A   | 36.875     | Retina               |
| TRA2A   | 3.70734    | Muscle               |
| TRA2A   | 3.96944    | Brain_cerebellum     |
| TRA2A   | 4.65669    | Eye                  |
| TRA2A   | 6.03245    | Liver                |
| TRA2A   | 8.06289    | Colon                |
| TRA2B   | 10.9519    | Spinal_cord          |
| TRA2B   | 12.06491   | Liver                |
| TRA2B   | 14.09633   | Placenta             |
| TRA2B   | 18.03666   | Lung                 |
| TRA2B   | 18.05931   | Brain_cortex         |
| TRA2B   | 19.84714   | Brain_cerebellum     |
| TRA2B   | 21.81228   | Stomach              |
| TRA2B   | 23.0042    | Retina               |
| TRA2B   | 28.78973   | Vascular_endothelium |
| TRA2B   | 29.5986    | White_Blood_Cells    |
| TRA2B   | 3.71133    | Muscle               |
| TRA2B   | 4.03145    | Colon                |
| TRA2B   | 41.40144   | Thyroid              |
| TRA2B   | 4.65669    | Eye                  |
| TRA2B   | 52.6797    | stem_cell            |
| TRA2B   | 54.0861    | Breast               |
| TRA2B   | 7.76986    | Brain_astrocyte      |
| TRA2B   | 9.87015    | Prostate             |
| TRBP2   | 13.748     | stem_cell            |
| TRBP2   | 3.96944    | Brain_cerebellum     |
| TRBP2   | 6.74798    | Prostate             |
| TRBP2   | 6.98503    | Eye                  |
| TRBP2   | 7.34659    | White_Blood_Cells    |
| TRBP2   | 7.74563    | Vascular_endothelium |
| TRSPAP1 | 11.127     | Prostate             |
| TRSPAP1 | 12.0391    | Heart                |
| TRSPAP1 | 13.7691    | Placenta             |
| TRSPAP1 | 3.01623    | Liver                |
| TRSPAP1 | 3.49516    | Breast               |
| TRSPAP1 | 3.72675    | Retina               |
| TRSPAP1 | 3.96944    | Brain_cerebellum     |
| TRSPAP1 | 4.2448     | Brain_cortex         |
| TRSPAP1 | 6.98503    | Eye                  |

© 2009 Landes Bioscience.  
Do not distribute.

Supplementary file 7

| RBPs    | Tag freque | Tissue               |
|---------|------------|----------------------|
| TRSPAP1 | 7.34659    | White_Blood_Cells    |
| TRSPAP1 | 7.74563    | Vascular_endothelium |
| TRSPAP1 | 8.17962    | Stomach              |
| TRSPAP1 | 9.55877    | stem_cell            |
| TUT1    | 12.0649    | Liver                |
| TUT1    | 13.1809    | stem_cell            |
| TUT1    | 13.2938    | Retina               |
| TUT1    | 13.5498    | Placenta             |
| TUT1    | 3.65063    | Spinal_cord          |
| TUT1    | 3.71133    | Muscle               |
| TUT1    | 3.88493    | Brain_astrocyte      |
| TUT1    | 3.96944    | Brain_cerebellum     |
| TUT1    | 4.65669    | Eye                  |
| TUT1    | 4.81562    | Heart                |
| TUT1    | 6.40502    | Brain_cortex         |
| TUT1    | 6.97885    | Vascular_endothelium |
| TUT1    | 7.91891    | Breast               |
| TUT1    | 8.17962    | Stomach              |
| U2AF1   | 12.0391    | Heart                |
| U2AF1   | 12.0649    | Liver                |
| U2AF1   | 12.81      | Brain_cortex         |
| U2AF1   | 13.8005    | Thyroid              |
| U2AF1   | 13.9701    | Eye                  |
| U2AF1   | 14.8453    | Muscle               |
| U2AF1   | 15.5397    | Brain_astrocyte      |
| U2AF1   | 15.7821    | Lung                 |
| U2AF1   | 16.1258    | Colon                |
| U2AF1   | 18.2532    | Spinal_cord          |
| U2AF1   | 23.232     | White_Blood_Cells    |
| U2AF1   | 24.426     | Vascular_endothelium |
| U2AF1   | 28.0995    | Prostate             |
| U2AF1   | 30.1705    | Retina               |
| U2AF1   | 32.1808    | Placenta             |
| U2AF1   | 44.6881    | Breast               |
| U2AF1   | 5.45308    | Stomach              |
| U2AF1   | 63.0879    | stem_cell            |
| U2AF1   | 7.93887    | Brain_cerebellum     |
| U2AF1L4 | 11.9083    | Brain_cerebellum     |
| U2AF1L4 | 12.8942    | Brain_cortex         |
| U2AF1L4 | 14.863     | White_Blood_Cells    |
| U2AF1L4 | 18.9912    | Retina               |
| U2AF1L4 | 3.01623    | Liver                |
| U2AF1L4 | 3.45012    | Thyroid              |
| U2AF1L4 | 3.87282    | Vascular_endothelium |
| U2AF1L4 | 3.93403    | Placenta             |
| U2AF1L4 | 6.74798    | Prostate             |
| U2AF1L4 | 7.42267    | Muscle               |
| U2AF1L4 | 7.76986    | Brain_astrocyte      |
| U2AF1L4 | 7.90852    | stem_cell            |
| U2AF2   | 15.4323    | Vascular_endothelium |
| U2AF2   | 15.8378    | Breast               |
| U2AF2   | 18.5047    | stem_cell            |

©2009 Landes Bioscience.  
Do not distribute.

Supplementary file 7

| RBPs  | Tag freque | Tissue               |
|-------|------------|----------------------|
| U2AF2 | 30.9759    | White_Blood_Cells    |
| U2AF2 | 3.88493    | Brain_astrocyte      |
| U2AF2 | 3.93403    | Placenta             |
| U2AF2 | 6.24434    | Prostate             |
| HDLBP | 104.893    | Brain_astrocyte      |
| HDLBP | 14.6932    | White_Blood_Cells    |
| HDLBP | 16.1258    | Colon                |
| HDLBP | 20.7007    | Thyroid              |
| HDLBP | 25.5544    | Spinal_cord          |
| HDLBP | 31.3015    | Heart                |
| HDLBP | 32.5968    | Eye                  |
| HDLBP | 32.7185    | Stomach              |
| HDLBP | 33.3661    | Muscle               |
| HDLBP | 33.8548    | stem_cell            |
| HDLBP | 35.2276    | Brain_cortex         |
| HDLBP | 36.875     | Retina               |
| HDLBP | 3.96944    | Brain_cerebellum     |
| HDLBP | 51.2759    | Liver                |
| HDLBP | 51.8555    | Lung                 |
| HDLBP | 60.7318    | Prostate             |
| HDLBP | 65.8379    | Vascular_endothelium |
| HDLBP | 68.8455    | Placenta             |
| HDLBP | 71.2702    | Breast               |
| YBOX1 | 107.6286   | Muscle               |
| YBOX1 | 14.5602    | Brain_cortex         |
| YBOX1 | 153.0986   | Breast               |
| YBOX1 | 24.12983   | Liver                |
| YBOX1 | 25.5544    | Spinal_cord          |
| YBOX1 | 286.9061   | stem_cell            |
| YBOX1 | 31.0511    | Thyroid              |
| YBOX1 | 38.0888    | Placenta             |
| YBOX1 | 38.1716    | Stomach              |
| YBOX1 | 56.3647    | Lung                 |
| YBOX1 | 57.0272    | Retina               |
| YBOX1 | 64.5031    | Colon                |
| YBOX1 | 75.74385   | White_Blood_Cells    |
| YBOX1 | 76.42415   | Vascular_endothelium |
| YBOX1 | 7.93887    | Brain_cerebellum     |
| YBOX1 | 85.4684    | Brain_astrocyte      |
| YBOX1 | 93.6651    | Prostate             |
| YBOX1 | 96.31242   | Heart                |
| YBOX1 | 97.7904    | Eye                  |
| YBOX2 | 18.5047    | stem_cell            |
| YBOX2 | 4.03145    | Colon                |
| YBOX2 | 7.45351    | Retina               |
| YBOX2 | 7.91891    | Breast               |
| YBOX2 | 8.17962    | Stomach              |
| ZCRB1 | 3.01623    | Liver                |
| ZCRB1 | 3.87199    | White_Blood_Cells    |
| ZCRB1 | 3.87282    | Vascular_endothelium |
| ZCRB1 | 3.93424    | Placenta             |
| ZCRB1 | 7.76986    | Brain_astrocyte      |

©2009 Landes Bioscience.  
Do not distribute.

*Supplementary file 7*

| <u>RBPs</u> | <u>Tag freque</u> | <u>Tissue</u>        |
|-------------|-------------------|----------------------|
| ZNF638      | 10.9519           | Spinal_cord          |
| ZNF638      | 11.7168           | Retina               |
| ZNF638      | 11.8548           | White_Blood_Cells    |
| ZNF638      | 11.8561           | Placenta             |
| ZNF638      | 12.8602           | Vascular_endothelium |
| ZNF638      | 15.4731           | Brain_cortex         |
| ZNF638      | 15.7821           | Lung                 |
| ZNF638      | 27.6798           | stem_cell            |
| ZNF638      | 3.37399           | Prostate             |
| ZNF638      | 3.88493           | Brain_astrocyte      |
| ZNF638      | 3.96944           | Brain_cerebellum     |
| ZNF638      | 4.65669           | Eye                  |
| ZNF638      | 6.90024           | Thyroid              |
| ZNF638      | 7.41468           | Muscle               |
| ZNF638      | 7.91891           | Breast               |
| ZNF638      | 8.17962           | Stomach              |
| ZNF638      | 9.04868           | Liver                |

©2009 Landes Bioscience.  
Do not distribute.

*Supplementary file 8*

| RBPs     | Tag frequency | Tissue                       |
|----------|---------------|------------------------------|
| APOBEC3F | 108.261       | peripheral_blood_lymphocytes |
| APOBEC3F | 10.9871       | adrenal_gland                |
| APOBEC3F | 11.6022       | pituitary_gland              |
| APOBEC3F | 17.226        | uterus                       |
| APOBEC3F | 18.9629       | Monocytes                    |
| APOBEC3F | 32.6177       | trachea                      |
| APOBEC3F | 3.70365       | salivary_gland               |
| APOBEC3F | 44.8974       | small_intestine              |
| APOBEC3F | 47.2117       | testis                       |
| APOBEC3F | 52.1979       | thymus                       |
| APOBEC3F | 6.9185        | bone_marrow                  |
| APOBEC1  | 4.48974       | small_intestine              |
| ADAT1    | 13.1574       | testis                       |
| AKAP1    | 10.9724       | peripheral_blood_lymphocytes |
| AKAP1    | 115.985       | small_intestine              |
| AKAP1    | 129.506       | bladder                      |
| AKAP1    | 15.6594       | thymus                       |
| AKAP1    | 16.1144       | adrenal_gland                |
| AKAP1    | 24.2148       | bone_marrow                  |
| AKAP1    | 24.7668       | testis                       |
| AKAP1    | 25.1848       | salivary_gland               |
| AKAP1    | 25.7895       | Monocytes                    |
| AKAP1    | 44.9375       | uterus                       |
| AKAP1    | 50.0344       | pituitary_gland              |
| AKAP1    | 55.3742       | trachea                      |
| AKAP1    | 84.8733       | kidney                       |
| AKAP1    | 92.3804       | skeletal_muscle              |
| ANKHD1   | 105.1416      | thymus                       |
| ANKHD1   | 105.1447      | pituitary_gland              |
| ANKHD1   | 16.82427      | peripheral_blood_lymphocytes |
| ANKHD1   | 18.5182       | salivary_gland               |
| ANKHD1   | 32.20517      | uterus                       |
| ANKHD1   | 3.45925       | bone_marrow                  |
| ANKHD1   | 4.10677       | kidney                       |
| ANKHD1   | 54.20299      | adrenal_gland                |
| ANKHD1   | 71.08756      | small_intestine              |
| ANKHD1   | 74.33448      | Monocytes                    |
| ANKHD1   | 83.5879       | testis                       |
| ANKHD1   | 85.4083       | skeletal_muscle              |
| ANKHD1   | 88.7505       | trachea                      |
| ANKHD1   | 89.831        | bladder                      |
| ANKRD17  | 16.68731      | Monocytes                    |
| ANKRD17  | 17.1116       | kidney                       |
| ANKRD17  | 22.96263      | salivary_gland               |
| ANKRD17  | 25.6022       | peripheral_blood_lymphocytes |
| ANKRD17  | 30.9585       | testis                       |
| ANKRD17  | 36.6237       | adrenal_gland                |
| ANKRD17  | 38.3466       | skeletal_muscle              |



*Supplementary file 8*

| RBPs     | Tag frequency | Tissue                       |
|----------|---------------|------------------------------|
| ANKRD17  | 47.16134      | bladder                      |
| ANKRD17  | 50.1802       | uterus                       |
| ANKRD17  | 6.22665       | bone_marrow                  |
| ANKRD17  | 70.84         | thymus                       |
| ANKRD17  | 77.3722       | trachea                      |
| ANKRD17  | 89.7949       | small_intestine              |
| ANKRD17  | 97.1682       | pituitary_gland              |
| ASCC1    | 4.64377       | testis                       |
| ASCC1    | 6.58342       | peripheral_blood_lymphocytes |
| BOLL     | 235.2848      | testis                       |
| BOLL     | 6.1006        | skeletal_muscle              |
| BRUNOL6  | 14.2302       | uterus                       |
| BRUNOL6  | 14.7053       | testis                       |
| BRUNOL6  | 28.336        | thymus                       |
| BRUNOL6  | 5.30986       | trachea                      |
| CCBL2    | 147.928       | pituitary_gland              |
| CCBL2    | 17.7775       | salivary_gland               |
| CCBL2    | 177.805       | bone_marrow                  |
| CCBL2    | 21.7878       | skeletal_muscle              |
| CCBL2    | 263.976       | trachea                      |
| CCBL2    | 287.6         | uterus                       |
| CCBL2    | 324.373       | thymus                       |
| CCBL2    | 32.5064       | testis                       |
| CCBL2    | 38.769        | peripheral_blood_lymphocytes |
| CCBL2    | 51.2731       | adrenal_gland                |
| CCBL2    | 83.4367       | Monocytes                    |
| CCBL2    | 84.5569       | small_intestine              |
| CCBL2    | 97.8781       | kidney                       |
| CCBL2    | 99.5627       | bladder                      |
| RCAN3    | 11.9775       | bladder                      |
| RCAN3    | 15.5553       | salivary_gland               |
| RCAN3    | 19.0188       | peripheral_blood_lymphocytes |
| RCAN3    | 22.4792       | pituitary_gland              |
| RCAN3    | 26.5493       | trachea                      |
| RCAN3    | 28.336        | thymus                       |
| RCAN3    | 3.09585       | testis                       |
| RCAN3    | 4.49375       | uterus                       |
| RCAN3    | 5.98633       | small_intestine              |
| RCAN3    | 9.8607        | Monocytes                    |
| CDKN2AIP | 18.1284       | pituitary_gland              |
| CDKN2AIP | 3.86981       | testis                       |
| CDKN2AIP | 73.2473       | adrenal_gland                |
| CIRBP    | 106.066       | peripheral_blood_lymphocytes |
| CIRBP    | 152.354       | adrenal_gland                |
| CIRBP    | 192.482       | uterus                       |
| CIRBP    | 21.4811       | salivary_gland               |
| CIRBP    | 21.7878       | skeletal_muscle              |
| CIRBP    | 26.548        | Monocytes                    |

*Supplementary file 8*

| RBPs  | Tag frequency | Tissue                       |
|-------|---------------|------------------------------|
| CIRBP | 34.9076       | kidney                       |
| CIRBP | 37.4296       | bladder                      |
| CIRBP | 38.0518       | bone_marrow                  |
| CIRBP | 505.42        | pituitary_gland              |
| CIRBP | 66.366        | thymus                       |
| CIRBP | 68.8427       | small_intestine              |
| CIRBP | 71.2045       | testis                       |
| CIRBP | 82.6821       | trachea                      |
| CNOT4 | 12.2012       | skeletal_muscle              |
| CNOT4 | 17.959        | small_intestine              |
| CNOT4 | 28.2803       | pituitary_gland              |
| CNOT4 | 36.4104       | trachea                      |
| CNOT4 | 36.5386       | thymus                       |
| CNOT4 | 53.176        | uterus                       |
| CNOT4 | 58.8211       | testis                       |
| CNOT4 | 6.59226       | adrenal_gland                |
| CNOT4 | 9.10218       | Monocytes                    |
| CNOT4 | 9.7317        | bladder                      |
| CPEB2 | 217.483       | testis                       |
| CPEB2 | 3.0342        | trachea                      |
| CPEB2 | 5.22908       | skeletal_muscle              |
| CPEB4 | 103.279       | adrenal_gland                |
| CPEB4 | 11.1853       | thymus                       |
| CPEB4 | 11.2344       | uterus                       |
| CPEB4 | 11.3777       | Monocytes                    |
| CPEB4 | 14.8157       | skeletal_muscle              |
| CPEB4 | 16.4271       | kidney                       |
| CPEB4 | 46.4087       | pituitary_gland              |
| CPEB4 | 5.92583       | salivary_gland               |
| CPEB4 | 6.82696       | trachea                      |
| CPEB4 | 6.9185        | bone_marrow                  |
| CPEB4 | 7.73962       | testis                       |
| CPSF5 | 106.776       | kidney                       |
| CPSF5 | 113.783       | trachea                      |
| CPSF5 | 212.52        | thymus                       |
| CPSF5 | 248.533       | bladder                      |
| CPSF5 | 248.654       | uterus                       |
| CPSF5 | 31.4541       | peripheral_blood_lymphocytes |
| CPSF5 | 428.555       | pituitary_gland              |
| CPSF5 | 43.703        | salivary_gland               |
| CPSF5 | 45.6621       | bone_marrow                  |
| CPSF5 | 50.5478       | skeletal_muscle              |
| CPSF5 | 61.5277       | adrenal_gland                |
| CPSF5 | 74.8291       | small_intestine              |
| CPSF5 | 85.9098       | testis                       |
| CPSF5 | 89.5048       | Monocytes                    |
| CPSF6 | 12.5924       | salivary_gland               |
| CPSF6 | 19.1733       | skeletal_muscle              |

*Supplementary file 8*

| RBPs   | Tag frequency | Tissue                       |
|--------|---------------|------------------------------|
| CPSF6  | 20.5092       | adrenal_gland                |
| CPSF6  | 23.9562       | kidney                       |
| CPSF6  | 29.2094       | uterus                       |
| CPSF6  | 35.9762       | bone_marrow                  |
| CPSF6  | 37.1502       | testis                       |
| CPSF6  | 47.0279       | Monocytes                    |
| CPSF6  | 47.9099       | bladder                      |
| CPSF6  | 50.7595       | pituitary_gland              |
| CPSF6  | 50.8229       | trachea                      |
| CPSF6  | 54.6252       | small_intestine              |
| CPSF6  | 65.6203       | thymus                       |
| CSTF2  | 5.30986       | trachea                      |
| CSTF2  | 5.85978       | adrenal_gland                |
| CSTF2  | 6.1917        | testis                       |
| CSTF2  | 7.97649       | pituitary_gland              |
| CSTF2  | 8.94822       | thymus                       |
| CSTF3  | 3.74479       | uterus                       |
| CSTF3  | 5.98633       | small_intestine              |
| CSTF2T | 11.97748      | bladder                      |
| CSTF2T | 12.38339      | testis                       |
| CSTF2T | 12.5924       | salivary_gland               |
| CSTF2T | 16.6881       | trachea                      |
| CSTF2T | 23.9295       | pituitary_gland              |
| CSTF2T | 28.33605      | thymus                       |
| CSTF2T | 31.42816      | small_intestine              |
| CSTF2T | 32.9613       | adrenal_gland                |
| CSTF2T | 37.6454       | kidney                       |
| CSTF2T | 5.22908       | skeletal_muscle              |
| CSTF2T | 6.06812       | Monocytes                    |
| CSTF2T | 6.9185        | bone_marrow                  |
| CSTF2T | 9.50939       | peripheral_blood_lymphocytes |
| CSTF2T | 9.73646       | uterus                       |
| CUGBP1 | 4.55109       | Monocytes                    |
| CUGBP1 | 9.28754       | testis                       |
| CUGBP2 | 104.80278     | bladder                      |
| CUGBP2 | 109.61553     | thymus                       |
| CUGBP2 | 12.3203       | kidney                       |
| CUGBP2 | 14.4118       | Monocytes                    |
| CUGBP2 | 19.34908      | testis                       |
| CUGBP2 | 20.0637       | bone_marrow                  |
| CUGBP2 | 21.2133       | peripheral_blood_lymphocytes |
| CUGBP2 | 31.3745       | skeletal_muscle              |
| CUGBP2 | 33.6938       | adrenal_gland                |
| CUGBP2 | 3.70365       | salivary_gland               |
| CUGBP2 | 40.443758     | uterus                       |
| CUGBP2 | 43.4009       | small_intestine              |
| CUGBP2 | 44.7545       | trachea                      |
| CUGBP2 | 69.613        | pituitary_gland              |

*Supplementary file 8*

| RBPs    | Tag frequency | Tissue                       |
|---------|---------------|------------------------------|
| DDX17   | 17.2962       | bone_marrow                  |
| DDX17   | 18.6421       | thymus                       |
| DDX17   | 3.09585       | testis                       |
| DDX17   | 5.23804       | small_intestine              |
| DDX17   | 5.30986       | trachea                      |
| DDX17   | 6.74062       | uterus                       |
| DDX17   | 7.48592       | bladder                      |
| DDX17   | 8.78968       | adrenal_gland                |
| DDX17   | 9.62948       | salivary_gland               |
| DDX53   | 14.7053       | testis                       |
| DGCR8   | 3.72842       | thymus                       |
| DHX9    | 104.054       | bladder                      |
| DHX9    | 106.776       | kidney                       |
| DHX9    | 113.019       | Monocytes                    |
| DHX9    | 119.19        | testis                       |
| DHX9    | 121.331       | uterus                       |
| DHX9    | 148.056       | bone_marrow                  |
| DHX9    | 152.469       | trachea                      |
| DHX9    | 159.679       | adrenal_gland                |
| DHX9    | 165.542       | thymus                       |
| DHX9    | 16.5588       | skeletal_muscle              |
| DHX9    | 201.29        | small_intestine              |
| DHX9    | 26.6663       | salivary_gland               |
| DHX9    | 355.317       | pituitary_gland              |
| DHX9    | 51.9359       | peripheral_blood_lymphocytes |
| DICER   | 117.818       | thymus                       |
| DICER   | 127.261       | bladder                      |
| DICER   | 143.565       | adrenal_gland                |
| DICER   | 147.545       | uterus                       |
| DICER   | 17.0272       | testis                       |
| DICER   | 240.02        | pituitary_gland              |
| DICER   | 285.202       | Monocytes                    |
| DICER   | 30.4414       | bone_marrow                  |
| DICER   | 40.7401       | salivary_gland               |
| DICER   | 45.6457       | small_intestine              |
| DICER   | 54.8619       | peripheral_blood_lymphocytes |
| DICER   | 63.6205       | skeletal_muscle              |
| DICER   | 69.1307       | kidney                       |
| DICER   | 94.0603       | trachea                      |
| DNAJC17 | 12.3273       | pituitary_gland              |
| DNAJC17 | 4.49375       | uterus                       |
| DNAJC17 | 4.55131       | trachea                      |
| DNAJC17 | 4.84295       | bone_marrow                  |
| DNAJC17 | 5.21979       | thymus                       |
| DNAJC17 | 55.6679       | adrenal_gland                |
| DKC1    | 128.706       | small_intestine              |
| DKC1    | 13.9442       | skeletal_muscle              |
| DKC1    | 19.0188       | peripheral_blood_lymphocytes |

*Supplementary file 8*

| RBPs         | Tag frequency | Tissue                       |
|--------------|---------------|------------------------------|
| DKC1         | 19.259        | salivary_gland               |
| DKC1         | 20.5339       | kidney                       |
| DKC1         | 25.4521       | bladder                      |
| DKC1         | 26.5493       | trachea                      |
| DKC1         | 35.6502       | Monocytes                    |
| DKC1         | 47.7377       | bone_marrow                  |
| DKC1         | 57.2732       | testis                       |
| DKC1         | 61.6365       | pituitary_gland              |
| DKC1         | 6.74062       | uterus                       |
| DKC1         | 70.8401       | thymus                       |
| DKC1         | 76.1772       | adrenal_gland                |
| DKFZp686F02. | 119.965       | peripheral_blood_lymphocytes |
| DKFZp686F02. | 13.4223       | thymus                       |
| DKFZp686F02. | 145.168       | small_intestine              |
| DKFZp686F02. | 35.1838       | bladder                      |
| DKFZp686F02. | 3.62568       | pituitary_gland              |
| DKFZp686F02. | 4.1511        | bone_marrow                  |
| DKFZp686F02. | 44.8898       | testis                       |
| DKFZp686F02. | 504.449       | kidney                       |
| DKFZp686F02. | 6.74062       | uterus                       |
| DKFZp686F02. | 742.586       | Monocytes                    |
| DKFZp686F02. | 752.982       | adrenal_gland                |
| DKFZp686F02. | 96.336        | trachea                      |
| DKFZp686F02. | 98.517        | salivary_gland               |
| DND1         | 3.42231       | kidney                       |
| DND1         | 75.0743       | testis                       |
| DRB1         | 3.62568       | pituitary_gland              |
| DRB1         | 5.41773       | testis                       |
| DSRAD        | 12.2012       | skeletal_muscle              |
| DSRAD        | 13.1668       | peripheral_blood_lymphocytes |
| DSRAD        | 22.7565       | trachea                      |
| DSRAD        | 30.7639       | adrenal_gland                |
| DSRAD        | 31.8576       | Monocytes                    |
| DSRAD        | 34.3015       | thymus                       |
| DSRAD        | 37.4145       | small_intestine              |
| DSRAD        | 4.44438       | salivary_gland               |
| DSRAD        | 45.6638       | testis                       |
| DSRAD        | 50.5051       | bone_marrow                  |
| DSRAD        | 74.689        | pituitary_gland              |
| DSRAD        | 88.3771       | uterus                       |
| DSRAD        | 9.7317        | bladder                      |
| DUSP11       | 14.9792       | uterus                       |
| DUSP11       | 3.09585       | testis                       |
| DUSP11       | 3.65746       | peripheral_blood_lymphocytes |
| DUSP11       | 3.72842       | thymus                       |
| DUSP11       | 4.35757       | skeletal_muscle              |
| DUSP11       | 5.85978       | adrenal_gland                |
| DUS2L        | 11.9833       | uterus                       |

*Supplementary file 8*

| RBPs   | Tag frequency | Tissue                       |
|--------|---------------|------------------------------|
| DUS2L  | 12.7209       | small_intestine              |
| DUS2L  | 16.469        | bladder                      |
| DUS2L  | 19.7214       | Monocytes                    |
| DUS2L  | 7.25136       | pituitary_gland              |
| DUS2L  | 7.52908       | kidney                       |
| DUS2L  | 88.2317       | testis                       |
| DUS2L  | 9.6859        | bone_marrow                  |
| DUS2L  | 9.6939        | thymus                       |
| E2AK2  | 3.03406       | Monocytes                    |
| E2AK2  | 3.66237       | adrenal_gland                |
| ELAV1  | 14.6298       | peripheral_blood_lymphocytes |
| ELAV1  | 15.0582       | kidney                       |
| ELAV1  | 18.8535       | pituitary_gland              |
| ELAV1  | 19.7223       | trachea                      |
| ELAV1  | 25.4419       | small_intestine              |
| ELAV1  | 26.369        | adrenal_gland                |
| ELAV1  | 32.9542       | uterus                       |
| ELAV1  | 4.84295       | bone_marrow                  |
| ELAV1  | 6.71116       | thymus                       |
| ELAV1  | 7.58515       | Monocytes                    |
| ELAV1  | 7.84362       | skeletal_muscle              |
| ELAV1  | 9.28754       | testis                       |
| ELAVL3 | 50.0344       | pituitary_gland              |
| ELAVL4 | 17.4033       | pituitary_gland              |
| ELAVL4 | 5.23804       | small_intestine              |
| ELAVL4 | 7.32473       | adrenal_gland                |
| EPRS   | 16.4771       | uterus                       |
| EPRS   | 18.2052       | trachea                      |
| EPRS   | 20.0448       | skeletal_muscle              |
| EPRS   | 24.6936       | small_intestine              |
| EPRS   | 24.8707       | peripheral_blood_lymphocytes |
| EPRS   | 3.70365       | salivary_gland               |
| EPRS   | 4.47411       | thymus                       |
| EPRS   | 6.59226       | adrenal_gland                |
| EPRS   | 76.1393       | pituitary_gland              |
| ERAL1  | 12.6766       | thymus                       |
| ERAL1  | 14.6495       | adrenal_gland                |
| ERAL1  | 15.171        | trachea                      |
| ERAL1  | 15.2279       | pituitary_gland              |
| ERAL1  | 18.7148       | bladder                      |
| ERAL1  | 19.3718       | bone_marrow                  |
| ERAL1  | 20.0448       | skeletal_muscle              |
| ERAL1  | 26.2135       | uterus                       |
| ERAL1  | 43.3419       | testis                       |
| ERAL1  | 46.394        | small_intestine              |
| ERAL1  | 6.58342       | peripheral_blood_lymphocytes |
| ERAL1  | 71.3004       | Monocytes                    |
| EXOS9  | 106.633       | thymus                       |

*Supplementary file 8*

| RBPs  | Tag frequency | Tissue                       |
|-------|---------------|------------------------------|
| EXOS9 | 112.224       | testis                       |
| EXOS9 | 14.0739       | salivary_gland               |
| EXOS9 | 150.945       | Monocytes                    |
| EXOS9 | 18.7148       | bladder                      |
| EXOS9 | 23.197        | small_intestine              |
| EXOS9 | 31.4853       | kidney                       |
| EXOS9 | 3.45925       | bone_marrow                  |
| EXOS9 | 40.9611       | skeletal_muscle              |
| EXOS9 | 41.695        | peripheral_blood_lymphocytes |
| EXOS9 | 43.9484       | adrenal_gland                |
| EXOS9 | 62.3617       | pituitary_gland              |
| EXOS9 | 83.1344       | uterus                       |
| EXOS9 | 96.336        | trachea                      |
| FBL   | 110.677       | testis                       |
| FBL   | 124.354       | peripheral_blood_lymphocytes |
| FBL   | 157.281       | uterus                       |
| FBL   | 18.4805       | kidney                       |
| FBL   | 27.407        | salivary_gland               |
| FBL   | 37.7071       | pituitary_gland              |
| FBL   | 44.7524       | Monocytes                    |
| FBL   | 5.22908       | skeletal_muscle              |
| FBL   | 56.1328       | trachea                      |
| FBL   | 57.1329       | adrenal_gland                |
| FBL   | 58.3902       | bladder                      |
| FBL   | 59.115        | small_intestine              |
| FBL   | 74.5685       | thymus                       |
| FBL   | 96.859        | bone_marrow                  |
| FMR1  | 10.0615       | testis                       |
| FMR1  | 13.0727       | skeletal_muscle              |
| FMR1  | 14.9658       | small_intestine              |
| FMR1  | 23.514        | Monocytes                    |
| FMR1  | 25.0322       | trachea                      |
| FMR1  | 32.2288       | adrenal_gland                |
| FMR1  | 35.201        | uterus                       |
| FMR1  | 3.70365       | salivary_gland               |
| FMR1  | 44.2333       | pituitary_gland              |
| FMR1  | 52.1979       | thymus                       |
| FMR1  | 9.50939       | peripheral_blood_lymphocytes |
| FUBP1 | 3.0342        | trachea                      |
| FUBP1 | 3.74479       | uterus                       |
| FUBP2 | 105.551       | bladder                      |
| FUBP2 | 10.9871       | adrenal_gland                |
| FUBP2 | 127.992       | bone_marrow                  |
| FUBP2 | 165.628       | testis                       |
| FUBP2 | 203.282       | Monocytes                    |
| FUBP2 | 26.9625       | uterus                       |
| FUBP2 | 28.435        | small_intestine              |
| FUBP2 | 29.9911       | peripheral_blood_lymphocytes |

*Supplementary file 8*

| RBPs    | Tag frequency | Tissue                       |
|---------|---------------|------------------------------|
| FUBP2   | 32.6177       | trachea                      |
| FUBP2   | 33.989        | skeletal_muscle              |
| FUBP2   | 43.9954       | thymus                       |
| FUBP2   | 52.0191       | kidney                       |
| FUBP2   | 57.2857       | pituitary_gland              |
| FUS     | 121.15        | kidney                       |
| FUS     | 177.75195     | peripheral_blood_lymphocytes |
| FUS     | 183.3312      | small_intestine              |
| FUS     | 200.2572      | trachea                      |
| FUS     | 219.00989     | adrenal_gland                |
| FUS     | 240.2977      | bladder                      |
| FUS     | 358.34454     | testis                       |
| FUS     | 369.81954     | pituitary_gland              |
| FUS     | 378.973       | uterus                       |
| FUS     | 43.5757       | skeletal_muscle              |
| FUS     | 449.041       | Monocytes                    |
| FUS     | 495.3648      | bone_marrow                  |
| FUS     | 785.95153     | thymus                       |
| FUS     | 91.10969      | salivary_gland               |
| FXR1    | 38.3466       | skeletal_muscle              |
| FXR1    | 8.34406       | trachea                      |
| G3BP2   | 10.4582       | skeletal_muscle              |
| G3BP2   | 13.9313       | testis                       |
| G3BP2   | 3.0342        | trachea                      |
| G3BP2   | 3.74296       | bladder                      |
| GRSF1   | 44.4472       | skeletal_muscle              |
| HNRPH3  | 124.3962      | Monocytes                    |
| HNRPH3  | 130.7596      | bone_marrow                  |
| HNRPH3  | 164.95508     | kidney                       |
| HNRPH3  | 174.14154     | testis                       |
| HNRPH3  | 188.1205      | trachea                      |
| HNRPH3  | 206.6112      | bladder                      |
| HNRPH3  | 217.0046      | small_intestine              |
| HNRPH3  | 247.9053      | uterus                       |
| HNRPH3  | 256.22514     | skeletal_muscle              |
| HNRPH3  | 353.4543      | thymus                       |
| HNRPH3  | 40.232        | peripheral_blood_lymphocytes |
| HNRPH3  | 45.18446      | salivary_gland               |
| HNRPH3  | 82.7695       | adrenal_gland                |
| HNRPH3  | 84.1158       | pituitary_gland              |
| HNRPUL1 | 129.252       | testis                       |
| HNRPUL1 | 14.8157       | skeletal_muscle              |
| HNRPUL1 | 21.9028       | kidney                       |
| HNRPUL1 | 21.998        | trachea                      |
| HNRPUL1 | 30.6799       | small_intestine              |
| HNRPUL1 | 39.1573       | pituitary_gland              |
| HNRPUL1 | 40.232        | peripheral_blood_lymphocytes |
| HNRPUL1 | 44.2784       | bone_marrow                  |



*Supplementary file 8*

| RBPs    | Tag frequency | Tissue                       |
|---------|---------------|------------------------------|
| HNRPUL1 | 44.6809       | adrenal_gland                |
| HNRPUL1 | 52.3376       | Monocytes                    |
| HNRPUL1 | 54.6472       | bladder                      |
| HNRPUL1 | 65.1594       | uterus                       |
| HNRPUL1 | 82.0253       | thymus                       |
| HNRPUL1 | 8.88875       | salivary_gland               |
| HNRPLL  | 14.2175       | small_intestine              |
| HNRPLL  | 15.3819       | adrenal_gland                |
| HNRPLL  | 16.469        | bladder                      |
| HNRPLL  | 17.8964       | thymus                       |
| HNRPLL  | 21.7198       | uterus                       |
| HNRPLL  | 24.87075      | peripheral_blood_lymphocytes |
| HNRPLL  | 29.5835       | trachea                      |
| HNRPLL  | 38.6843       | Monocytes                    |
| HNRPLL  | 54.1773       | testis                       |
| HNRPLL  | 6.1006        | skeletal_muscle              |
| HNRPA0  | 117.52914     | bladder                      |
| HNRPA0  | 119.781       | kidney                       |
| HNRPA0  | 132.14355     | bone_marrow                  |
| HNRPA0  | 174.49051     | thymus                       |
| HNRPA0  | 218.27652     | adrenal_gland                |
| HNRPA0  | 221.69141     | uterus                       |
| HNRPA0  | 292.02806     | Monocytes                    |
| HNRPA0  | 35.55498      | salivary_gland               |
| HNRPA0  | 70.95465      | peripheral_blood_lymphocytes |
| HNRPA0  | 75.09656      | trachea                      |
| HNRPA0  | 76.622262     | testis                       |
| HNRPA0  | 97.6095       | skeletal_muscle              |
| HNRPA0  | 99.34361      | pituitary_gland              |
| HNRPA0  | 99.52267      | small_intestine              |
| HNRPCL1 | 106.951       | Monocytes                    |
| HNRPCL1 | 12.5924       | salivary_gland               |
| HNRPCL1 | 13.0727       | skeletal_muscle              |
| HNRPCL1 | 13.4747       | bladder                      |
| HNRPCL1 | 13.6539       | trachea                      |
| HNRPCL1 | 14.9137       | thymus                       |
| HNRPCL1 | 15.2279       | pituitary_gland              |
| HNRPCL1 | 41.1927       | uterus                       |
| HNRPCL1 | 45.4133       | adrenal_gland                |
| HNRPCL1 | 47.7377       | bone_marrow                  |
| HNRPCL1 | 49.0099       | peripheral_blood_lymphocytes |
| HNRPCL1 | 55.4414       | kidney                       |
| HNRPCL1 | 56.4992       | testis                       |
| HNRPCL1 | 6.73462       | small_intestine              |
| HNRPD   | 14.9658       | small_intestine              |
| HNRPD   | 22.4792       | pituitary_gland              |
| HNRPD   | 26.099        | thymus                       |
| HNRPD   | 3.0342        | trachea                      |

*Supplementary file 8*

| RBPs   | Tag frequency | Tissue                       |
|--------|---------------|------------------------------|
| HNRPD  | 3.66237       | adrenal_gland                |
| HNRPD  | 8.23854       | uterus                       |
| HNRPDL | 1028.3        | thymus                       |
| HNRPDL | 112.591       | salivary_gland               |
| HNRPDL | 149.44        | bone_marrow                  |
| HNRPDL | 291.524       | adrenal_gland                |
| HNRPDL | 299.11        | kidney                       |
| HNRPDL | 345.991       | skeletal_muscle              |
| HNRPDL | 356.797       | testis                       |
| HNRPDL | 392.262       | bladder                      |
| HNRPDL | 465.728       | Monocytes                    |
| HNRPDL | 533.258       | uterus                       |
| HNRPDL | 534.28        | small_intestine              |
| HNRPDL | 685.73        | trachea                      |
| HNRPDL | 685.978       | pituitary_gland              |
| HNRPDL | 82.6585       | peripheral_blood_lymphocytes |
| HNRPF  | 12.1362       | Monocytes                    |
| HNRPF  | 131.1127      | adrenal_gland                |
| HNRPF  | 152.6347      | kidney                       |
| HNRPF  | 160.8823      | small_intestine              |
| HNRPF  | 168.2316      | pituitary_gland              |
| HNRPF  | 174.4903      | thymus                       |
| HNRPF  | 226.0745      | bladder                      |
| HNRPF  | 231.3577      | trachea                      |
| HNRPF  | 37.306        | peripheral_blood_lymphocytes |
| HNRPF  | 67.1094       | bone_marrow                  |
| HNRPF  | 76.3937       | uterus                       |
| HNRPF  | 87.1514       | skeletal_muscle              |
| HNRPF  | 92.8755       | testis                       |
| HNRPG  | 113.0374      | bladder                      |
| HNRPG  | 127.6239      | pituitary_gland              |
| HNRPG  | 144.549       | uterus                       |
| HNRPG  | 15.9125       | bone_marrow                  |
| HNRPG  | 236.382       | thymus                       |
| HNRPG  | 28.14772      | salivary_gland               |
| HNRPG  | 30.8008       | kidney                       |
| HNRPG  | 37.1673       | Monocytes                    |
| HNRPG  | 43.88951      | peripheral_blood_lymphocytes |
| HNRPG  | 46.4378       | testis                       |
| HNRPG  | 54.9355       | adrenal_gland                |
| HNRPG  | 80.0671       | small_intestine              |
| HNRPG  | 81.165        | trachea                      |
| HNRPG  | 88.0229       | skeletal_muscle              |
| HNRPGT | 115.32        | testis                       |
| HNRPK  | 10.6192       | Monocytes                    |
| HNRPK  | 15.3613       | peripheral_blood_lymphocytes |
| HNRPK  | 22.4449       | testis                       |
| HNRPK  | 23.5309       | skeletal_muscle              |

*Supplementary file 8*

| RBPs    | Tag frequency | Tissue                       |
|---------|---------------|------------------------------|
| HNRPK   | 24.6936       | small_intestine              |
| HNRPK   | 25.3798       | pituitary_gland              |
| HNRPK   | 38.8211       | adrenal_gland                |
| HNRPK   | 50.1802       | uterus                       |
| HNRPK   | 5.5348        | bone_marrow                  |
| HNRPL   | 15.7204       | bladder                      |
| HNRPL   | 17.796        | kidney                       |
| HNRPL   | 18.6421       | thymus                       |
| HNRPL   | 20.0448       | skeletal_muscle              |
| HNRPL   | 20.5092       | adrenal_gland                |
| HNRPL   | 32.6311       | pituitary_gland              |
| HNRPL   | 37.1502       | testis                       |
| HNRPL   | 49.4312       | uterus                       |
| HNRPL   | 5.1851        | salivary_gland               |
| HNRPL   | 7.31491       | peripheral_blood_lymphocytes |
| HNRPL   | 8.34406       | trachea                      |
| HNRPL   | 85.3051       | small_intestine              |
| HNRPL   | 9.6859        | bone_marrow                  |
| SYNCRIP | 16.2532       | testis                       |
| SYNCRIP | 19.1733       | skeletal_muscle              |
| SYNCRIP | 23.2064       | bladder                      |
| SYNCRIP | 24.6076       | thymus                       |
| SYNCRIP | 24.6936       | small_intestine              |
| SYNCRIP | 25.6366       | adrenal_gland                |
| SYNCRIP | 3.42231       | kidney                       |
| SYNCRIP | 52.3376       | Monocytes                    |
| SYNCRIP | 5.30986       | trachea                      |
| SYNCRIP | 6.52622       | pituitary_gland              |
| HNRPR   | 11.22888      | bladder                      |
| HNRPR   | 11.8517       | salivary_gland               |
| HNRPR   | 13.14515      | bone_marrow                  |
| HNRPR   | 15.17102      | trachea                      |
| HNRPR   | 19.17325      | skeletal_muscle              |
| HNRPR   | 24.76679      | testis                       |
| HNRPR   | 38.1628       | small_intestine              |
| HNRPR   | 4.55109       | Monocytes                    |
| HNRPR   | 49.07568      | adrenal_gland                |
| HNRPR   | 58.4188       | uterus                       |
| HNRPR   | 81.2797       | thymus                       |
| HNRPR   | 95.7179       | pituitary_gland              |
| HNRPU   | 11.0696       | bone_marrow                  |
| HNRPU   | 114.09011     | thymus                       |
| HNRPU   | 18.96292      | Monocytes                    |
| HNRPU   | 19.25892      | salivary_gland               |
| HNRPU   | 24.87067      | peripheral_blood_lymphocytes |
| HNRPU   | 26.83         | pituitary_gland              |
| HNRPU   | 47.8906       | small_intestine              |
| HNRPU   | 47.9099       | bladder                      |

*Supplementary file 8*

| RBPs    | Tag frequency | Tissue                       |
|---------|---------------|------------------------------|
| HNRPU   | 68.26955      | trachea                      |
| HNRPU   | 74.14691      | uterus                       |
| HNRPU   | 74.7122       | adrenal_gland                |
| HNRPU   | 82.135462     | kidney                       |
| HNRPU   | 88.0229       | skeletal_muscle              |
| HNRPU   | 94.4234       | testis                       |
| HTF9C   | 10.2546       | adrenal_gland                |
| HTF9C   | 12.7323       | uterus                       |
| HTF9C   | 3.42231       | kidney                       |
| HTF9C   | 3.72842       | thymus                       |
| HTF9C   | 48.7596       | testis                       |
| HTF9C   | 5.30986       | trachea                      |
| HTATSF1 | 10.4582       | skeletal_muscle              |
| HTATSF1 | 14.2302       | uterus                       |
| HTATSF1 | 5.12731       | adrenal_gland                |
| HTATSF1 | 5.24014       | bladder                      |
| HTATSF1 | 5.96548       | thymus                       |
| HTATSF1 | 6.96566       | testis                       |
| HTATSF1 | 8.70163       | pituitary_gland              |
| IF2B    | 110.682       | skeletal_muscle              |
| IF2B    | 14.0739       | salivary_gland               |
| IF2B    | 18.2044       | Monocytes                    |
| IF2B    | 18.7148       | bladder                      |
| IF2B    | 27.7115       | uterus                       |
| IF2B    | 42.4265       | peripheral_blood_lymphocytes |
| IF2B    | 48.3432       | adrenal_gland                |
| IF2B    | 50.8838       | small_intestine              |
| IF2B    | 53.0986       | trachea                      |
| IF2B    | 61.143        | testis                       |
| IF2B    | 64.8746       | thymus                       |
| IF2B    | 79.0398       | pituitary_gland              |
| EIF3S4  | 6.58342       | peripheral_blood_lymphocytes |
| EIF4H   | 116.733       | small_intestine              |
| EIF4H   | 140.332       | trachea                      |
| EIF4H   | 156.532       | uterus                       |
| EIF4H   | 188.246       | adrenal_gland                |
| EIF4H   | 211.706       | bone_marrow                  |
| EIF4H   | 28.1477       | salivary_gland               |
| EIF4H   | 283.685       | Monocytes                    |
| EIF4H   | 41.794        | testis                       |
| EIF4H   | 426.38        | pituitary_gland              |
| EIF4H   | 427.446       | bladder                      |
| EIF4H   | 84.2624       | thymus                       |
| EIF4H   | 88.2956       | kidney                       |
| EIF4H   | 99.3526       | skeletal_muscle              |
| IGF2BP1 | 6.96566       | testis                       |
| IGF2BP3 | 12.3834       | testis                       |
| IGF2BP3 | 3.79275       | trachea                      |

*Supplementary file 8*

| RBPs    | Tag frequency | Tissue                       |
|---------|---------------|------------------------------|
| IGF2BP3 | 4.84295       | bone_marrow                  |
| IGF2BP3 | 6.52622       | pituitary_gland              |
| ILF3    | 101.768       | small_intestine              |
| ILF3    | 109.616       | thymus                       |
| ILF3    | 15.3613       | peripheral_blood_lymphocytes |
| ILF3    | 18.1284       | pituitary_gland              |
| ILF3    | 19.1649       | kidney                       |
| ILF3    | 22.7555       | Monocytes                    |
| ILF3    | 28.3659       | bone_marrow                  |
| ILF3    | 3.48605       | skeletal_muscle              |
| ILF3    | 36.3762       | testis                       |
| ILF3    | 42.2216       | salivary_gland               |
| ILF3    | 53.8571       | trachea                      |
| ILF3    | 63.6303       | bladder                      |
| ILF3    | 67.3875       | adrenal_gland                |
| ILF3    | 80.8875       | uterus                       |
| IREB1   | 114.591       | uterus                       |
| IREB1   | 125.015       | bladder                      |
| IREB1   | 164.624       | small_intestine              |
| IREB1   | 238.054       | adrenal_gland                |
| IREB1   | 26.9822       | bone_marrow                  |
| IREB1   | 30.3699       | salivary_gland               |
| IREB1   | 34.1332       | Monocytes                    |
| IREB1   | 38.0299       | thymus                       |
| IREB1   | 41.8327       | skeletal_muscle              |
| IREB1   | 476.386       | kidney                       |
| IREB1   | 52.34         | trachea                      |
| IREB1   | 55.8355       | pituitary_gland              |
| IREB1   | 78.9441       | testis                       |
| IREB2   | 5.85978       | adrenal_gland                |
| KRR1    | 15.4792       | testis                       |
| KRR1    | 17.9662       | bladder                      |
| KRR1    | 21.70042      | small_intestine              |
| KRR1    | 33.3562       | pituitary_gland              |
| KRR1    | 33.37625      | trachea                      |
| KRR1    | 40.4437       | uterus                       |
| KRR1    | 45.4868       | thymus                       |
| KRR1    | 7.61035       | bone_marrow                  |
| KRR1    | 8.21355       | kidney                       |
| KRR1    | 8.343665      | Monocytes                    |
| KRR1    | 8.78968       | adrenal_gland                |
| LA      | 10.4854       | uterus                       |
| LA      | 11.3777       | Monocytes                    |
| LA      | 3.74145       | small_intestine              |
| LA      | 4.38895       | peripheral_blood_lymphocytes |
| LA      | 4.49155       | bladder                      |
| LA      | 5.85978       | adrenal_gland                |
| LA      | 6.1006        | skeletal_muscle              |

*Supplementary file 8*

| RBPs    | Tag frequency | Tissue                       |
|---------|---------------|------------------------------|
| LA      | 9.28754       | testis                       |
| LARP4   | 15.4792       | testis                       |
| LARP4   | 4.55109       | Monocytes                    |
| LARP4   | 6.84462       | kidney                       |
| LARP7   | 11.2244       | small_intestine              |
| LARP7   | 11.2289       | bladder                      |
| LARP7   | 11.3777       | Monocytes                    |
| LARP7   | 12.3834       | testis                       |
| LARP7   | 12.6766       | thymus                       |
| LARP7   | 15.171        | trachea                      |
| LARP7   | 18.1284       | pituitary_gland              |
| LARP7   | 18.724        | uterus                       |
| LARP7   | 24.9041       | adrenal_gland                |
| LARP7   | 33.989        | skeletal_muscle              |
| LRPPRC  | 10.6192       | Monocytes                    |
| LRPPRC  | 13.8983       | peripheral_blood_lymphocytes |
| LRPPRC  | 27.407        | salivary_gland               |
| LRPPRC  | 32.5169       | bone_marrow                  |
| LRPPRC  | 34.2231       | kidney                       |
| LRPPRC  | 38.9458       | uterus                       |
| LRPPRC  | 42.0579       | pituitary_gland              |
| LRPPRC  | 49.6763       | skeletal_muscle              |
| LRPPRC  | 60.6841       | trachea                      |
| LRPPRC  | 62.1081       | small_intestine              |
| LRPPRC  | 67.3733       | bladder                      |
| LRPPRC  | 71.5858       | thymus                       |
| LRPPRC  | 91.3275       | testis                       |
| LRPPRC  | 91.5591       | adrenal_gland                |
| LSM5    | 15.3819       | adrenal_gland                |
| LSM5    | 17.80115      | testis                       |
| LSM5    | 23.20636      | bladder                      |
| LSM5    | 24.71562      | uterus                       |
| LSM5    | 29.5821       | Monocytes                    |
| LSM5    | 30.8008       | kidney                       |
| LSM5    | 33.67306      | small_intestine              |
| LSM5    | 37.3599       | bone_marrow                  |
| LSM5    | 45.35247      | peripheral_blood_lymphocytes |
| LSM5    | 49.96088      | thymus                       |
| LSM5    | 50.54775      | skeletal_muscle              |
| LSM5    | 62.9597       | trachea                      |
| LSM5    | 63.7027       | salivary_gland               |
| LSM5    | 66.71254      | pituitary_gland              |
| MOV10L1 | 11.6094       | testis                       |
| MATR3   | 12.1368       | trachea                      |
| MATR3   | 20.9521       | small_intestine              |
| MATR3   | 4.35757       | skeletal_muscle              |
| MATR3   | 4.64377       | testis                       |
| MATR3   | 5.92583       | salivary_gland               |

*Supplementary file 8*

| RBPs     | Tag frequency | Tissue                       |
|----------|---------------|------------------------------|
| MATR3    | 5.96548       | thymus                       |
| MATR3    | 5.99167       | uterus                       |
| MATR3    | 9.7317        | bladder                      |
| MGC10433 | 10.4396       | thymus                       |
| MGC10433 | 16.6881       | trachea                      |
| MGC10433 | 18.5751       | testis                       |
| MGC10433 | 21.2417       | adrenal_gland                |
| MGC10433 | 32.9542       | uterus                       |
| MGC10433 | 6.9185        | bone_marrow                  |
| MGC10433 | 7.31491       | peripheral_blood_lymphocytes |
| MGC10433 | 8.2312        | small_intestine              |
| MGC10433 | 9.10218       | Monocytes                    |
| MGC27016 | 33.2804       | testis                       |
| MINT     | 11.1109       | salivary_gland               |
| MINT     | 154.737       | Monocytes                    |
| MINT     | 160.322       | thymus                       |
| MINT     | 17.5558       | peripheral_blood_lymphocytes |
| MINT     | 26.1454       | skeletal_muscle              |
| MINT     | 51.2731       | adrenal_gland                |
| MINT     | 68.4462       | kidney                       |
| MINT     | 71.9785       | testis                       |
| MINT     | 72.8209       | trachea                      |
| MINT     | 81.6364       | uterus                       |
| MINT     | 81.9403       | pituitary_gland              |
| MINT     | 89.7949       | small_intestine              |
| MINT     | 89.831        | bladder                      |
| MINT     | 9.6859        | bone_marrow                  |
| MKI67IP  | 3.86981       | testis                       |
| MKI67IP  | 6.97211       | skeletal_muscle              |
| MKI67IP  | 8.20253       | thymus                       |
| MSI2H    | 19.7768       | adrenal_gland                |
| MSI2H    | 27.7115       | uterus                       |
| MSI2H    | 32.0644       | thymus                       |
| MSI2H    | 6.52622       | pituitary_gland              |
| MSI2H    | 9.7317        | bladder                      |
| MYEF2    | 100.61502     | testis                       |
| MYEF2    | 10.9871       | adrenal_gland                |
| MYEF2    | 27.6979       | bladder                      |
| MYEF2    | 31.4282       | small_intestine              |
| MYEF2    | 34.30145      | thymus                       |
| MYEF2    | 50.03434      | pituitary_gland              |
| SLC4A1AP | 20.2038       | small_intestine              |
| SLC4A1AP | 6.74062       | uterus                       |
| NCBP1    | 5.21979       | thymus                       |
| NCBP1    | 7.73962       | testis                       |
| NHP2L1   | 114.3052      | kidney                       |
| NHP2L1   | 119.3096      | thymus                       |
| NHP2L1   | 145.0294      | adrenal_gland                |

*Supplementary file 8*

| RBPs   | Tag frequency | Tissue                       |
|--------|---------------|------------------------------|
| NHP2L1 | 161.5715      | trachea                      |
| NHP2L1 | 168.4333      | bladder                      |
| NHP2L1 | 172.5596      | skeletal_muscle              |
| NHP2L1 | 211.6257      | Monocytes                    |
| NHP2L1 | 222.9909      | small_intestine              |
| NHP2L1 | 228.4173      | pituitary_gland              |
| NHP2L1 | 231.8823      | peripheral_blood_lymphocytes |
| NHP2L1 | 254.6332      | testis                       |
| NHP2L1 | 62.962        | salivary_gland               |
| NHP2L1 | 85.3812       | uterus                       |
| NHP2L1 | 92.0161       | bone_marrow                  |
| NKRF   | 17.226        | uterus                       |
| NKRF   | 8.777901      | peripheral_blood_lymphocytes |
| NOL3   | 10.3702       | salivary_gland               |
| NOL3   | 11.2289       | bladder                      |
| NOL3   | 21.7878       | skeletal_muscle              |
| NOL3   | 25.4646       | uterus                       |
| NOL3   | 3.74145       | small_intestine              |
| NOL3   | 6.1917        | testis                       |
| NOL3   | 65.1901       | adrenal_gland                |
| NOL4   | 11.9775       | bladder                      |
| NOL4   | 32.5064       | testis                       |
| NOL4   | 57.2857       | pituitary_gland              |
| NOL4   | 8.20253       | thymus                       |
| NOL8   | 3.79275       | trachea                      |
| NOL8   | 5.21979       | thymus                       |
| NOL8   | 6.06812       | Monocytes                    |
| NOL8   | 8.70163       | pituitary_gland              |
| NOL8   | 8.7779        | peripheral_blood_lymphocytes |
| NOL8   | 9.58665       | skeletal_muscle              |
| NONO   | 10.9514       | kidney                       |
| NONO   | 17.226        | uterus                       |
| NONO   | 20.1335       | thymus                       |
| NONO   | 25.6366       | adrenal_gland                |
| NONO   | 28.0664       | trachea                      |
| NONO   | 53.8546       | Monocytes                    |
| NONO   | 6.73733       | bladder                      |
| NONO   | 7.40729       | salivary_gland               |
| NONO   | 7.73962       | testis                       |
| NONO   | 8.3022        | bone_marrow                  |
| NONO   | 9.42677       | pituitary_gland              |
| NONO   | 9.58665       | skeletal_muscle              |
| NOP56  | 17.2962       | bone_marrow                  |
| NOP56  | 17.44581      | Monocytes                    |
| NOP56  | 22.6594       | skeletal_muscle              |
| NOP56  | 27.10152      | adrenal_gland                |
| NOP56  | 29.18337      | small_intestine              |
| NOP56  | 34.1348       | trachea                      |



*Supplementary file 8*

| RBPs   | Tag frequency | Tissue                       |
|--------|---------------|------------------------------|
| NOP56  | 3.70365       | salivary_gland               |
| NOP56  | 52.2098       | pituitary_gland              |
| NOP56  | 55.4229       | uterus                       |
| NOP56  | 58.5193       | peripheral_blood_lymphocytes |
| NOP56  | 61.891885     | thymus                       |
| NOVA1  | 13.4223       | thymus                       |
| NOVA1  | 16.4624       | small_intestine              |
| NOVA1  | 21.6709       | testis                       |
| NOVA1  | 27.5552       | pituitary_gland              |
| NOVA1  | 3.0342        | trachea                      |
| NOVA1  | 6.73733       | bladder                      |
| NCL    | 133.121       | testis                       |
| NCL    | 13.837        | bone_marrow                  |
| NCL    | 169.157       | trachea                      |
| NCL    | 178.093       | small_intestine              |
| NCL    | 225.197       | thymus                       |
| NCL    | 225.602       | adrenal_gland                |
| NCL    | 246.407       | uterus                       |
| NCL    | 26.3337       | peripheral_blood_lymphocytes |
| NCL    | 39.4428       | Monocytes                    |
| NCL    | 54.9054       | skeletal_muscle              |
| NCL    | 55.5547       | salivary_gland               |
| NCL    | 66.7125       | pituitary_gland              |
| NCL    | 85.3395       | bladder                      |
| NUFIP1 | 3.86981       | testis                       |
| NUFIP1 | 5.23804       | small_intestine              |
| NUFIP1 | 5.2427        | uterus                       |
| NUFIP1 | 6.97211       | skeletal_muscle              |
| HRB    | 13.0727       | skeletal_muscle              |
| HRB    | 152.462       | Monocytes                    |
| HRB    | 176.463       | testis                       |
| HRB    | 26.5493       | trachea                      |
| HRB    | 29.2094       | uterus                       |
| HRB    | 42.0579       | pituitary_gland              |
| HRB    | 44.8974       | small_intestine              |
| HRB    | 49.0099       | peripheral_blood_lymphocytes |
| HRB    | 61.1462       | thymus                       |
| HRB    | 62.2665       | bone_marrow                  |
| HRB    | 66.6247       | bladder                      |
| HRB    | 77.6421       | adrenal_gland                |
| HRB    | 8.14802       | salivary_gland               |
| HRB    | 91.7179       | kidney                       |
| NXF1   | 109.25        | small_intestine              |
| NXF1   | 140.446       | bone_marrow                  |
| NXF1   | 155.179       | pituitary_gland              |
| NXF1   | 190.984       | uterus                       |
| NXF1   | 194.938       | Monocytes                    |
| NXF1   | 207.3         | thymus                       |

*Supplementary file 8*

| RBPs      | Tag frequency | Tissue                       |
|-----------|---------------|------------------------------|
| NXF1      | 23.4077       | peripheral_blood_lymphocytes |
| NXF1      | 24.4441       | salivary_gland               |
| NXF1      | 268.085       | adrenal_gland                |
| NXF1      | 31.3745       | skeletal_muscle              |
| NXF1      | 36.2765       | kidney                       |
| NXF1      | 82.3451       | bladder                      |
| NXF1      | 82.6821       | trachea                      |
| NXF1      | 83.5879       | testis                       |
| NXF2      | 10.6197       | trachea                      |
| NXF2      | 11.6022       | pituitary_gland              |
| NXF2      | 33.2804       | testis                       |
| NXF2      | 3.42231       | kidney                       |
| PABP2     | 108.62        | bone_marrow                  |
| PABP2     | 12.3273       | pituitary_gland              |
| PABP2     | 12.5924       | salivary_gland               |
| PABP2     | 13.8983       | peripheral_blood_lymphocytes |
| PABP2     | 19.3878       | thymus                       |
| PABP2     | 30.342        | trachea                      |
| PABP2     | 3.74296       | bladder                      |
| PABP2     | 47.1423       | small_intestine              |
| PABP2     | 62.9927       | adrenal_gland                |
| PABP2     | 69.6531       | uterus                       |
| PABP2     | 70.4305       | testis                       |
| PABP2     | 8.89801       | kidney                       |
| PABP2     | 9.10218       | Monocytes                    |
| PABP4     | 12.1368       | trachea                      |
| PABP4     | 184.761       | skeletal_muscle              |
| PABP4     | 26.9625       | uterus                       |
| PABP4     | 28.5282       | peripheral_blood_lymphocytes |
| PABP4     | 3.79258       | Monocytes                    |
| PABP4     | 44.8898       | testis                       |
| PABP4     | 49.8082       | adrenal_gland                |
| PABP4     | 5.4757        | kidney                       |
| PABP4     | 68.8427       | small_intestine              |
| PABP4     | 8.94822       | thymus                       |
| PAIP1     | 116.094       | testis                       |
| PAIP1     | 129.648       | adrenal_gland                |
| PAIP1     | 15.9288       | Monocytes                    |
| PAIP1     | 161.775       | uterus                       |
| PAIP1     | 25.9255       | salivary_gland               |
| PAIP1     | 29.0054       | pituitary_gland              |
| PAIP1     | 36.6662       | small_intestine              |
| PAIP1     | 426.17        | skeletal_muscle              |
| PAIP1     | 70.8401       | thymus                       |
| PAIP1     | 8.04641       | peripheral_blood_lymphocytes |
| PAIP1     | 88.7505       | trachea                      |
| C20orf119 | 11.2244       | small_intestine              |
| C20orf119 | 11.3783       | trachea                      |

*Supplementary file 8*

| RBPs      | Tag frequency | Tissue                       |
|-----------|---------------|------------------------------|
| C20orf119 | 13.0524       | pituitary_gland              |
| C20orf119 | 41.0127       | thymus                       |
| C20orf119 | 4.64377       | testis                       |
| C20orf119 | 4.79124       | kidney                       |
| C20orf119 | 5.24271       | uterus                       |
| C20orf119 | 5.5348        | bone_marrow                  |
| C20orf119 | 5.92583       | salivary_gland               |
| C20orf119 | 6.59226       | adrenal_gland                |
| PAPOLA    | 22.7555       | Monocytes                    |
| PAPOLA    | 27.407        | salivary_gland               |
| PAPOLA    | 28.5282       | peripheral_blood_lymphocytes |
| PAPOLA    | 36.681        | bladder                      |
| PAPOLA    | 38.9458       | uterus                       |
| PAPOLA    | 42.4834       | adrenal_gland                |
| PAPOLA    | 46.394        | small_intestine              |
| PAPOLA    | 52.7036       | kidney                       |
| PAPOLA    | 53.0986       | trachea                      |
| PAPOLA    | 62.749        | skeletal_muscle              |
| PAPOLA    | 76.8055       | thymus                       |
| PAPOLA    | 80.4901       | pituitary_gland              |
| PAPOLA    | 99.8411       | testis                       |
| PAPOLB    | 10.0615       | testis                       |
| PAPOLB    | 5.96548       | thymus                       |
| PAPOLG    | 10.4803       | bladder                      |
| PAPOLG    | 13.0524       | pituitary_gland              |
| PAPOLG    | 18.7073       | small_intestine              |
| PAPOLG    | 26.8447       | thymus                       |
| PAPOLG    | 8.34406       | trachea                      |
| PCBP2     | 101.01        | bone_marrow                  |
| PCBP2     | 101.096       | skeletal_muscle              |
| PCBP2     | 146.047       | uterus                       |
| PCBP2     | 150.149       | testis                       |
| PCBP2     | 172.176       | bladder                      |
| PCBP2     | 176.734       | Monocytes                    |
| PCBP2     | 186.324       | small_intestine              |
| PCBP2     | 209.537       | thymus                       |
| PCBP2     | 47.0302       | trachea                      |
| PCBP2     | 48.1474       | salivary_gland               |
| PCBP2     | 54.3852       | pituitary_gland              |
| PCBP2     | 60.2327       | kidney                       |
| PCBP2     | 62.2602       | adrenal_gland                |
| PCBP2     | 88.5105       | peripheral_blood_lymphocytes |
| POLDIP3   | 4.55131       | trachea                      |
| POLDIP3   | 5.24271       | uterus                       |
| SF3B14    | 106.325       | skeletal_muscle              |
| SF3B14    | 117.196       | adrenal_gland                |
| SF3B14    | 123.998       | pituitary_gland              |
| SF3B14    | 13.1452       | bone_marrow                  |

*Supplementary file 8*

| RBPs   | Tag frequency | Tissue                       |
|--------|---------------|------------------------------|
| SF3B14 | 138.808       | Monocytes                    |
| SF3B14 | 140.934       | thymus                       |
| SF3B14 | 190.814       | small_intestine              |
| SF3B14 | 25.7907       | trachea                      |
| SF3B14 | 58.5193       | peripheral_blood_lymphocytes |
| SF3B14 | 67.7618       | kidney                       |
| SF3B14 | 68.8826       | testis                       |
| SF3B14 | 7.40729       | salivary_gland               |
| SF3B14 | 89.875        | uterus                       |
| SF3B14 | 95.8198       | bladder                      |
| PNPT1  | 15.4792       | testis                       |
| PNPT1  | 20.0448       | skeletal_muscle              |
| PNPT1  | 21.9447       | peripheral_blood_lymphocytes |
| PNPT1  | 7.25136       | pituitary_gland              |
| PNPT1  | 7.45685       | thymus                       |
| PNPT1  | 9.52215       | adrenal_gland                |
| PPP1R8 | 13.1574       | testis                       |
| PPP1R8 | 3.48605       | skeletal_muscle              |
| PPP1R8 | 4.35081       | pituitary_gland              |
| PPP1R8 | 8.9875        | uterus                       |
| PPIE   | 10.2546       | adrenal_gland                |
| PPIE   | 3.09585       | testis                       |
| PPIE   | 3.74145       | small_intestine              |
| PPIE   | 3.79275       | trachea                      |
| PPIE   | 8.9875        | uterus                       |
| PPIE   | 9.6939        | thymus                       |
| PPIL4  | 10.877        | pituitary_gland              |
| PPIL4  | 10.9871       | adrenal_gland                |
| PPIL4  | 15.47923      | testis                       |
| PPIL4  | 22.75544      | Monocytes                    |
| PPIL4  | 3.48605       | skeletal_muscle              |
| PPIL4  | 5.24271       | uterus                       |
| PPIL4  | 5.98874       | bladder                      |
| PPIL4  | 6.16016       | kidney                       |
| PPIL4  | 6.71116       | thymus                       |
| PPRC1  | 10.4803       | bladder                      |
| PPRC1  | 11.60943      | testis                       |
| PPRC1  | 12.73229      | uterus                       |
| PPRC1  | 16.60445      | bone_marrow                  |
| PPRC1  | 23.861885     | thymus                       |
| PPRC1  | 26.369        | adrenal_gland                |
| PPRC1  | 3.48605       | skeletal_muscle              |
| PPRC1  | 5.30986       | trachea                      |
| PPRC1  | 6.06812       | Monocytes                    |
| PPRC1  | 8.21355       | kidney                       |
| PPRC1  | 8.2312        | small_intestine              |
| PPRC1  | 8.70163       | pituitary_gland              |
| PRKRA  | 15.4792       | testis                       |

*Supplementary file 8*

| RBPs     | Tag frequency | Tissue                       |
|----------|---------------|------------------------------|
| PRKRA    | 17.4303       | skeletal_muscle              |
| PRKRA    | 4.49375       | uterus                       |
| PRKRA    | 5.12731       | adrenal_gland                |
| PRKRA    | 5.80109       | pituitary_gland              |
| PSPC1    | 23.2189       | testis                       |
| PSPC1    | 4.35757       | skeletal_muscle              |
| PSPC1    | 5.80109       | pituitary_gland              |
| PSPC1    | 5.85978       | adrenal_gland                |
| PSPC1    | 6.71116       | thymus                       |
| PTBP1    | 108.406       | adrenal_gland                |
| PTBP1    | 108.502       | small_intestine              |
| PTBP1    | 116.053       | Monocytes                    |
| PTBP1    | 119.96373     | testis                       |
| PTBP1    | 120.3817      | bone_marrow                  |
| PTBP1    | 134.223685    | thymus                       |
| PTBP1    | 14.8157       | skeletal_muscle              |
| PTBP1    | 18.4805       | kidney                       |
| PTBP1    | 211.95487     | uterus                       |
| PTBP1    | 37.7071       | pituitary_gland              |
| PTBP1    | 50.0644       | trachea                      |
| PTBP1    | 62.1331       | bladder                      |
| PTBP1    | 80.7395       | salivary_gland               |
| PTBP1    | 82.6585       | peripheral_blood_lymphocytes |
| PTBP2    | 11.8517       | salivary_gland               |
| PTBP2    | 121.331       | uterus                       |
| PTBP2    | 131.229       | trachea                      |
| PTBP2    | 14.8157       | skeletal_muscle              |
| PTBP2    | 168.724       | testis                       |
| PTBP2    | 177.658       | pituitary_gland              |
| PTBP2    | 20.4799       | Monocytes                    |
| PTBP2    | 246.822       | thymus                       |
| PTBP2    | 34.9076       | kidney                       |
| PTBP2    | 35.2844       | bone_marrow                  |
| PTBP2    | 39.5535       | adrenal_gland                |
| PTBP2    | 90.5796       | bladder                      |
| PTBP2    | 96.5295       | small_intestine              |
| RAD51AP1 | 13.1845       | adrenal_gland                |
| RAD51AP1 | 16.6044       | bone_marrow                  |
| RAD51AP1 | 3.0342        | trachea                      |
| RAD51AP1 | 41.156        | small_intestine              |
| RAD51AP1 | 57.4177       | thymus                       |
| RAD51AP1 | 5.99167       | uterus                       |
| RAE1     | 31.7324       | testis                       |
| RAE1     | 3.48605       | skeletal_muscle              |
| RAE1     | 4.49375       | uterus                       |
| RAE1     | 6.73462       | small_intestine              |
| RAVER2   | 15.7141       | small_intestine              |
| RAVER2   | 22.4792       | pituitary_gland              |

*Supplementary file 8*

| RBPs   | Tag frequency | Tissue                       |
|--------|---------------|------------------------------|
| RAVER2 | 32.6177       | trachea                      |
| RAVER2 | 3.48605       | skeletal_muscle              |
| RAVER2 | 5.12731       | adrenal_gland                |
| RAVER2 | 6.96566       | testis                       |
| RBM12B | 3.86981       | testis                       |
| RBM12B | 8.94822       | thymus                       |
| RBM15B | 16.4624       | small_intestine              |
| RBM15B | 3.09585       | testis                       |
| RBM15B | 32.9171       | peripheral_blood_lymphocytes |
| RBM15B | 4.49375       | uterus                       |
| RBM15B | 5.30986       | trachea                      |
| RBM15B | 8.14802       | salivary_gland               |
| RBM15B | 8.94822       | thymus                       |
| RBM15B | 9.10218       | Monocytes                    |
| RBM35A | 11.2344       | uterus                       |
| RBM35A | 11.9727       | small_intestine              |
| RBM35A | 5.30986       | trachea                      |
| RBM35B | 11.6359       | kidney                       |
| RBM35B | 13.15736      | testis                       |
| RBM35B | 16.6881       | trachea                      |
| RBM35B | 4.489741      | small_intestine              |
| RBM35B | 7.48592       | bladder                      |
| RBM10  | 11.9775       | bladder                      |
| RBM10  | 22.2219       | salivary_gland               |
| RBM10  | 22.4449       | testis                       |
| RBM10  | 28.336        | thymus                       |
| RBM10  | 37.7071       | pituitary_gland              |
| RBM10  | 39.4446       | trachea                      |
| RBM10  | 54.9355       | adrenal_gland                |
| RBM10  | 55.4414       | kidney                       |
| RBM10  | 64.353        | small_intestine              |
| RBM10  | 67.5079       | Monocytes                    |
| RBM10  | 74.6121       | peripheral_blood_lymphocytes |
| RBM10  | 89.9405       | bone_marrow                  |
| RBM10  | 9.58665       | skeletal_muscle              |
| RBM10  | 99.6114       | uterus                       |
| RBM12  | 102.22059     | salivary_gland               |
| RBM12  | 109.9899      | trachea                      |
| RBM12  | 112.2885      | bladder                      |
| RBM12  | 114.2658      | adrenal_gland                |
| RBM12  | 141.40149     | pituitary_gland              |
| RBM12  | 214.2021      | uterus                       |
| RBM12  | 235.2287      | bone_marrow                  |
| RBM12  | 266.209485    | thymus                       |
| RBM12  | 314.02515     | Monocytes                    |
| RBM12  | 36.2765       | kidney                       |
| RBM12  | 67.1066       | skeletal_muscle              |
| RBM12  | 69.6566       | testis                       |

*Supplementary file 8*

| RBPs  | Tag frequency | Tissue                       |
|-------|---------------|------------------------------|
| RBM12 | 79.001        | peripheral_blood_lymphocytes |
| RBM12 | 96.52952      | small_intestine              |
| RBM14 | 11.931        | thymus                       |
| RBM14 | 18.9638       | trachea                      |
| RBM14 | 3.48605       | skeletal_muscle              |
| RBM14 | 45.6865       | uterus                       |
| RBM14 | 4.64377       | testis                       |
| RBM15 | 4.64377       | testis                       |
| RBM16 | 6.1006        | skeletal_muscle              |
| RBM16 | 9.28754       | testis                       |
| RBM18 | 6.1917        | testis                       |
| RBM19 | 15.5553       | salivary_gland               |
| RBM22 | 10.4582       | skeletal_muscle              |
| RBM22 | 15.3819       | adrenal_gland                |
| RBM22 | 20.897        | testis                       |
| RBM22 | 23.2717       | kidney                       |
| RBM22 | 4.38895       | peripheral_blood_lymphocytes |
| RBM22 | 5.96548       | thymus                       |
| RBM22 | 8.34406       | trachea                      |
| RBM23 | 10.6192       | Monocytes                    |
| RBM23 | 15.5553       | salivary_gland               |
| RBM23 | 18.9638       | trachea                      |
| RBM23 | 20.4818       | peripheral_blood_lymphocytes |
| RBM23 | 22.6594       | skeletal_muscle              |
| RBM23 | 32.1895       | bladder                      |
| RBM23 | 39.1573       | pituitary_gland              |
| RBM23 | 41.0127       | thymus                       |
| RBM23 | 47.1844       | uterus                       |
| RBM23 | 4.79124       | kidney                       |
| RBM23 | 48.7596       | testis                       |
| RBM23 | 56.8701       | small_intestine              |
| RBM23 | 62.9927       | adrenal_gland                |
| RBM23 | 8.99405       | bone_marrow                  |
| RBM24 | 107.797       | bladder                      |
| RBM24 | 11.6094       | testis                       |
| RBM24 | 12.8954       | trachea                      |
| RBM24 | 29.1833       | small_intestine              |
| RBM24 | 29.7495       | bone_marrow                  |
| RBM24 | 30.7073       | uterus                       |
| RBM24 | 31.1808       | pituitary_gland              |
| RBM24 | 848.854       | skeletal_muscle              |
| RBM25 | 12.1362       | Monocytes                    |
| RBM25 | 13.0048       | kidney                       |
| RBM25 | 21.9742       | adrenal_gland                |
| RBM25 | 22.8311       | bone_marrow                  |
| RBM25 | 26.1454       | skeletal_muscle              |
| RBM25 | 33.3762       | trachea                      |
| RBM25 | 41.02         | testis                       |

*Supplementary file 8*

| RBPs  | Tag frequency | Tissue                       |
|-------|---------------|------------------------------|
| RBM25 | 41.1927       | uterus                       |
| RBM25 | 41.3327       | pituitary_gland              |
| RBM25 | 41.7584       | thymus                       |
| RBM25 | 8.88875       | salivary_gland               |
| RBM25 | 8.9831        | bladder                      |
| RBM25 | 95.0329       | small_intestine              |
| RBM26 | 12.8954       | trachea                      |
| RBM26 | 17.226        | uterus                       |
| RBM26 | 18.5751       | testis                       |
| RBM26 | 20.5092       | adrenal_gland                |
| RBM26 | 26.9385       | small_intestine              |
| RBM26 | 3.70365       | salivary_gland               |
| RBM26 | 41.0127       | thymus                       |
| RBM26 | 4.49155       | bladder                      |
| RBM26 | 71.0633       | pituitary_gland              |
| RBM27 | 12.73229      | uterus                       |
| RBM27 | 13.42234      | thymus                       |
| RBM27 | 14.5289       | bone_marrow                  |
| RBM27 | 15.9288       | Monocytes                    |
| RBM27 | 20.95211      | small_intestine              |
| RBM27 | 3.79275       | trachea                      |
| RBM27 | 50.4729       | peripheral_blood_lymphocytes |
| RBM27 | 51.8555       | testis                       |
| RBM27 | 5.4757        | kidney                       |
| RBM27 | 6.1006        | skeletal_muscle              |
| RBM3  | 129.628       | salivary_gland               |
| RBM3  | 131.113       | adrenal_gland                |
| RBM3  | 142.409       | testis                       |
| RBM3  | 158.111       | kidney                       |
| RBM3  | 169.862       | small_intestine              |
| RBM3  | 225.326       | bladder                      |
| RBM3  | 232.614       | peripheral_blood_lymphocytes |
| RBM33 | 15.3613       | peripheral_blood_lymphocytes |
| RBM33 | 16.296        | salivary_gland               |
| RBM33 | 24.9041       | adrenal_gland                |
| RBM33 | 30.3406       | Monocytes                    |
| RBM33 | 313.933       | thymus                       |
| RBM33 | 33.6866       | bladder                      |
| RBM3  | 338.298       | Monocytes                    |
| RBM33 | 54.674        | uterus                       |
| RBM33 | 55.7253       | testis                       |
| RBM33 | 56.1328       | trachea                      |
| RBM33 | 6.1006        | skeletal_muscle              |
| RBM3  | 366.131       | thymus                       |
| RBM33 | 80.0671       | small_intestine              |
| RBM33 | 8.99405       | bone_marrow                  |
| RBM33 | 93.5425       | pituitary_gland              |
| RBM34 | 12.1368       | trachea                      |



*Supplementary file 8*

| RBPs  | Tag frequency | Tissue                       |
|-------|---------------|------------------------------|
| RBM34 | 18.6421       | thymus                       |
| RBM34 | 20.2038       | small_intestine              |
| RBM34 | 27.0887       | testis                       |
| RBM34 | 28.4604       | uterus                       |
| RBM34 | 3.70365       | salivary_gland               |
| RBM34 | 3.79258       | Monocytes                    |
| RBM34 | 39.1573       | pituitary_gland              |
| RBM34 | 4.79124       | kidney                       |
| RBM34 | 6.1006        | skeletal_muscle              |
| RBM34 | 6.58342       | peripheral_blood_lymphocytes |
| RBM34 | 9.52215       | adrenal_gland                |
| RBM3  | 49.6763       | skeletal_muscle              |
| RBM3  | 533.261       | trachea                      |
| RBM3  | 68.4931       | bone_marrow                  |
| RBM39 | 109.9847      | Monocytes                    |
| RBM39 | 133.341514    | skeletal_muscle              |
| RBM39 | 139.0619      | bone_marrow                  |
| RBM39 | 257.51637     | bladder                      |
| RBM3  | 92.8708       | uterus                       |
| RBM39 | 307.3237      | kidney                       |
| RBM39 | 326.6118      | testis                       |
| RBM39 | 391.14        | adrenal_gland                |
| RBM39 | 48.1474       | salivary_gland               |
| RBM39 | 512.579       | small_intestine              |
| RBM39 | 539.501       | pituitary_gland              |
| RBM39 | 650.982       | thymus                       |
| RBM39 | 725.934       | trachea                      |
| RBM39 | 793.894958    | uterus                       |
| RBM39 | 90.705        | peripheral_blood_lymphocytes |
| RBM4  | 129.376       | bone_marrow                  |
| RBM41 | 3.09585       | testis                       |
| RBM4  | 135.022       | trachea                      |
| RBM41 | 3.79275       | trachea                      |
| RBM4  | 143.053       | kidney                       |
| RBM4  | 156.594       | thymus                       |
| RBM4  | 160.199       | bladder                      |
| RBM4  | 176.526       | adrenal_gland                |
| RBM4  | 182.734       | pituitary_gland              |
| RBM4  | 208.773       | small_intestine              |
| RBM4  | 216.935       | Monocytes                    |
| RBM4  | 247.668       | testis                       |
| RBM4  | 310.069       | uterus                       |
| RBM4  | 65.8342       | peripheral_blood_lymphocytes |
| RBM4  | 83.6653       | skeletal_muscle              |
| RBM4  | 85.1839       | salivary_gland               |
| RBM5  | 15.171        | trachea                      |
| RBM5  | 19.4556       | small_intestine              |
| RBM5  | 64.5371       | pituitary_gland              |

*Supplementary file 8*

| RBPs  | Tag frequency | Tissue                       |
|-------|---------------|------------------------------|
| RBM5  | 8.23854       | uterus                       |
| RBM5  | 8.94822       | thymus                       |
| RBM6  | 11.3297       | skeletal_muscle              |
| RBM6  | 11.3777       | Monocytes                    |
| RBM6  | 18.3118       | adrenal_gland                |
| RBM6  | 19.1649       | kidney                       |
| RBM6  | 32.5169       | bone_marrow                  |
| RBM6  | 35.1116       | peripheral_blood_lymphocytes |
| RBM6  | 3.70365       | salivary_gland               |
| RBM6  | 47.2117       | testis                       |
| RBM6  | 74.338        | trachea                      |
| RBM6  | 80.1385       | uterus                       |
| RBM6  | 89.0466       | small_intestine              |
| RBM6  | 90.2279       | thymus                       |
| RBM7  | 11.8517       | salivary_gland               |
| RBM7  | 22.4687       | uterus                       |
| RBM7  | 29.5821       | Monocytes                    |
| RBM7  | 31.8251       | bone_marrow                  |
| RBM7  | 32.9171       | peripheral_blood_lymphocytes |
| RBM7  | 36.2765       | kidney                       |
| RBM7  | 45.4133       | adrenal_gland                |
| RBM7  | 47.1338       | pituitary_gland              |
| RBM7  | 55.3958       | bladder                      |
| RBM7  | 57.2732       | testis                       |
| RBM7  | 71.0876       | small_intestine              |
| RBM7  | 71.3038       | trachea                      |
| RBM7  | 85.0081       | thymus                       |
| RBM7  | 95.8665       | skeletal_muscle              |
| RBM8A | 10.1519       | pituitary_gland              |
| RBM8A | 18.64214      | thymus                       |
| RBM8A | 20.9163       | skeletal_muscle              |
| RBM8A | 22.7555       | Monocytes                    |
| RBM8A | 3.034201      | trachea                      |
| RBM8A | 3.74296       | bladder                      |
| RBM8A | 4.10677       | kidney                       |
| RBM8A | 4.1511        | bone_marrow                  |
| RBM8A | 4.44438       | salivary_gland               |
| RBM8A | 5.127313      | adrenal_gland                |
| RBM8A | 5.99167       | uterus                       |
| RBM8A | 6.191692      | testis                       |
| RBM8A | 6.73462       | small_intestine              |
| RBMS2 | 18.5751       | testis                       |
| RBMS2 | 3.0342        | trachea                      |
| RBMS2 | 5.23804       | small_intestine              |
| RBMS3 | 13.0524       | pituitary_gland              |
| RBMS3 | 13.1845       | adrenal_gland                |
| RBMS3 | 14.9658       | small_intestine              |
| RBMS3 | 17.1508       | thymus                       |

*Supplementary file 8*

| RBPs  | Tag frequency | Tissue                       |
|-------|---------------|------------------------------|
| RBMS3 | 18.2052       | trachea                      |
| RBMS3 | 30.7073       | uterus                       |
| RBMS3 | 3.09585       | testis                       |
| RBMS3 | 37.4296       | bladder                      |
| RBMS3 | 4.79124       | kidney                       |
| RBMS3 | 8.99405       | bone_marrow                  |
| RBMS3 | 9.58665       | skeletal_muscle              |
| RBP56 | 10.8355       | testis                       |
| RBP56 | 10.877        | pituitary_gland              |
| RBP56 | 18.7073       | small_intestine              |
| RBP56 | 21.2417       | adrenal_gland                |
| RBP56 | 32.9381       | bladder                      |
| RBP56 | 4.55131       | trachea                      |
| RBP56 | 7.45685       | thymus                       |
| RBP56 | 8.9875        | uterus                       |
| RBP56 | 9.10218       | Monocytes                    |
| RBP56 | 9.58665       | skeletal_muscle              |
| RBPMS | 13.917        | adrenal_gland                |
| RBPMS | 14.2232       | bladder                      |
| RBPMS | 18.7073       | small_intestine              |
| RBPMS | 3.09585       | testis                       |
| RBPMS | 3.70365       | salivary_gland               |
| RBPMS | 3.72842       | thymus                       |
| RBPMS | 41.9417       | uterus                       |
| RIB1  | 10.4396       | thymus                       |
| RIB1  | 113.772       | testis                       |
| RIB1  | 155.904       | pituitary_gland              |
| RIB1  | 19.8494       | kidney                       |
| RIB1  | 20.0448       | skeletal_muscle              |
| RIB1  | 27.674        | bone_marrow                  |
| RIB1  | 31.4541       | peripheral_blood_lymphocytes |
| RIB1  | 32.5921       | salivary_gland               |
| RIB1  | 51.5815       | trachea                      |
| RIB1  | 7.58515       | Monocytes                    |
| RIB1  | 86.1302       | uterus                       |
| RIB1  | 8.9831        | bladder                      |
| RIB1  | 91.2915       | small_intestine              |
| RIB1  | 95.2215       | adrenal_gland                |
| RKHD3 | 125.3818      | testis                       |
| RPL12 | 113.037       | bladder                      |
| RPL12 | 28.4604       | uterus                       |
| RPL12 | 35.918        | small_intestine              |
| RPL12 | 40.9611       | skeletal_muscle              |
| RPL12 | 43.2354       | Monocytes                    |
| RPL12 | 470.349       | peripheral_blood_lymphocytes |
| RPL12 | 49.2152       | thymus                       |
| RPL12 | 52.0056       | adrenal_gland                |
| RPL12 | 53.66         | pituitary_gland              |

*Supplementary file 8*

| RBPs  | Tag frequency | Tissue                       |
|-------|---------------|------------------------------|
| RPL12 | 8.21355       | kidney                       |
| RPL12 | 83.4406       | trachea                      |
| RPL12 | 94.0916       | bone_marrow                  |
| RPL13 | 1073.8        | small_intestine              |
| RPL13 | 1075.83       | bone_marrow                  |
| RPL13 | 1123          | thymus                       |
| RPL13 | 1477.4        | adrenal_gland                |
| RPL13 | 147.91        | Monocytes                    |
| RPL13 | 157.953       | bladder                      |
| RPL13 | 1890.37       | uterus                       |
| RPL13 | 270.363       | kidney                       |
| RPL13 | 3353.89       | peripheral_blood_lymphocytes |
| RPL13 | 535.15        | pituitary_gland              |
| RPL13 | 578.685       | skeletal_muscle              |
| RPL13 | 628.839       | trachea                      |
| RPL13 | 643.936       | testis                       |
| RPL13 | 959.985       | salivary_gland               |
| RPL18 | 1146.09       | bladder                      |
| RPL18 | 1415.02       | small_intestine              |
| RPL18 | 1427.53       | Monocytes                    |
| RPL18 | 1529.68       | bone_marrow                  |
| RPL18 | 1787.23       | adrenal_gland                |
| RPL18 | 1926.32       | uterus                       |
| RPL18 | 3339.26       | peripheral_blood_lymphocytes |
| RPL18 | 386.952       | skeletal_muscle              |
| RPL18 | 613.752       | testis                       |
| RPL18 | 685.174       | salivary_gland               |
| RPL18 | 792.686       | trachea                      |
| RPL18 | 808.526       | pituitary_gland              |
| RPL18 | 82.8199       | kidney                       |
| RPL18 | 829.202       | thymus                       |
| RPL22 | 1327.66       | peripheral_blood_lymphocytes |
| RPL22 | 292.558       | testis                       |
| RPL22 | 303.722       | bone_marrow                  |
| RPL22 | 354.809       | salivary_gland               |
| RPL22 | 399.738       | Monocytes                    |
| RPL22 | 453.401       | adrenal_gland                |
| RPL22 | 613.963       | kidney                       |
| RPL22 | 662.914       | thymus                       |
| RPL22 | 682.395       | skeletal_muscle              |
| RPL22 | 702.928       | bladder                      |
| RPL22 | 707.007       | pituitary_gland              |
| RPL22 | 797.996       | trachea                      |
| RPL22 | 904.683       | small_intestine              |
| RPL22 | 930.9552      | uterus                       |
| RPL28 | 115.039514    | skeletal_muscle              |
| RPL28 | 131.9877      | trachea                      |
| RPL28 | 1356.9213     | peripheral_blood_lymphocytes |

*Supplementary file 8*

| RBPs   | Tag frequency | Tissue                       |
|--------|---------------|------------------------------|
| RPL28  | 137.2059      | thymus                       |
| RPL28  | 143.359515    | Monocytes                    |
| RPL28  | 21.02897      | pituitary_gland              |
| RPL28  | 21.2183       | kidney                       |
| RPL28  | 267.35273     | adrenal_gland                |
| RPL28  | 470.67491     | small_intestine              |
| RPL28  | 560.2205      | uterus                       |
| RPL28  | 571.46855     | bone_marrow                  |
| RPL28  | 91.32826      | bladder                      |
| RPL28  | 99.84113      | testis                       |
| RPL28  | 99.99846      | salivary_gland               |
| RPL34  | 1051.84       | salivary_gland               |
| RPL34  | 1158.24       | skeletal_muscle              |
| RPL34  | 1300.85       | Monocytes                    |
| RPL34  | 1311.75       | bone_marrow                  |
| RPL34  | 1593.86       | adrenal_gland                |
| RPL34  | 1706.36       | kidney                       |
| RPL34  | 1962.76316    | small_intestine              |
| RPL34  | 2173.67       | thymus                       |
| RPL34  | 2195.62       | bladder                      |
| RPL34  | 2349.44       | pituitary_gland              |
| RPL34  | 2352.48       | uterus                       |
| RPL34  | 2473.6297     | trachea                      |
| RPL34  | 4860.03       | peripheral_blood_lymphocytes |
| RPL34  | 636.197       | testis                       |
| RPL3L  | 27.8884       | skeletal_muscle              |
| RPLP2  | 113.846       | pituitary_gland              |
| RPLP2  | 131.986       | thymus                       |
| RPLP2  | 143.701       | salivary_gland               |
| RPLP2  | 155.644       | small_intestine              |
| RPLP2  | 160.805       | Monocytes                    |
| RPLP2  | 162.585       | bone_marrow                  |
| RPLP2  | 220.579       | testis                       |
| RPLP2  | 2272.01       | peripheral_blood_lymphocytes |
| RPLP2  | 260.028       | adrenal_gland                |
| RPLP2  | 354.706       | skeletal_muscle              |
| RPLP2  | 584.187       | uterus                       |
| RPLP2  | 65.8761       | bladder                      |
| RPLP2  | 726.692       | trachea                      |
| RPLP2  | 79.3976       | kidney                       |
| MRPL3  | 38.4322       | pituitary_gland              |
| MRPL23 | 5.98874       | bladder                      |
| RNASEL | 4.84295       | bone_marrow                  |
| RNASEL | 6.74062       | uterus                       |
| RNASE1 | 13.4692       | small_intestine              |
| RNASE1 | 6.74062       | uterus                       |
| RNASE1 | 8.78968       | adrenal_gland                |
| RNH1   | 3.72842       | thymus                       |

*Supplementary file 8*

| RBPs     | Tag frequency | Tissue                       |
|----------|---------------|------------------------------|
| RO60     | 3.62568       | pituitary_gland              |
| RO60     | 3.66237       | adrenal_gland                |
| RO60     | 4.64377       | testis                       |
| HNRPA2B1 | 1064.2        | testis                       |
| HNRPA2B1 | 1174.72       | pituitary_gland              |
| HNRPA2B1 | 194.071       | salivary_gland               |
| HNRPA2B1 | 2176.65       | thymus                       |
| HNRPA2B1 | 314.541       | peripheral_blood_lymphocytes |
| HNRPA2B1 | 337.276       | skeletal_muscle              |
| HNRPA2B1 | 411.362       | kidney                       |
| HNRPA2B1 | 433.79        | bone_marrow                  |
| HNRPA2B1 | 483.933       | Monocytes                    |
| HNRPA2B1 | 664.001       | bladder                      |
| HNRPA2B1 | 825.352       | uterus                       |
| HNRPA2B1 | 930.973       | adrenal_gland                |
| HNRPA2B1 | 948.189       | trachea                      |
| HNRPA2B1 | 981.009       | small_intestine              |
| HNRPA3   | 147.159       | kidney                       |
| HNRPA3   | 183.560515    | Monocytes                    |
| HNRPA3   | 195.794       | bone_marrow                  |
| HNRPA3   | 209.5644      | pituitary_gland              |
| HNRPA3   | 211.9553      | uterus                       |
| HNRPA3   | 222.99078     | small_intestine              |
| HNRPA3   | 235.15065     | trachea                      |
| HNRPA3   | 243.2927      | bladder                      |
| HNRPA3   | 262.9575      | adrenal_gland                |
| HNRPA3   | 338.54079     | thymus                       |
| HNRPA3   | 520.8764      | testis                       |
| HNRPA3   | 59.2508       | peripheral_blood_lymphocytes |
| HNRPA3   | 74.81365      | salivary_gland               |
| HNRPA3   | 85.40837      | skeletal_muscle              |
| ROD1     | 3.0342        | trachea                      |
| ROD1     | 32.5064       | testis                       |
| ROD1     | 6.16016       | kidney                       |
| ROD1     | 6.71116       | thymus                       |
| RPL18A   | 1054.53       | skeletal_muscle              |
| RPL18A   | 1080.22       | bladder                      |
| RPL18A   | 1166.65       | salivary_gland               |
| RPL18A   | 1492.32       | bone_marrow                  |
| RPL18A   | 1617.3        | adrenal_gland                |
| RPL18A   | 1637.26       | small_intestine              |
| RPL18A   | 1773.98       | thymus                       |
| RPL18A   | 226.796       | Monocytes                    |
| RPL18A   | 2336.75       | uterus                       |
| RPL18A   | 2386.86       | peripheral_blood_lymphocytes |
| RPL18A   | 336.755       | kidney                       |
| RPL18A   | 627.683       | testis                       |
| RPL18A   | 646.821       | pituitary_gland              |

*Supplementary file 8*

| RBPs   | Tag frequency | Tissue                       |
|--------|---------------|------------------------------|
| RPL18A | 912.537       | trachea                      |
| RPP29  | 10.2546       | adrenal_gland                |
| RPP29  | 10.3778       | bone_marrow                  |
| RPP29  | 10.8355       | testis                       |
| RPP29  | 12.2012       | skeletal_muscle              |
| RPP29  | 17.226        | uterus                       |
| RPP29  | 17.4467       | trachea                      |
| RPP29  | 21.9028       | kidney                       |
| RPP29  | 26.3337       | peripheral_blood_lymphocytes |
| RPP29  | 29.5821       | Monocytes                    |
| RPP29  | 8.94822       | thymus                       |
| RPP29  | 8.97949       | small_intestine              |
| RPS17  | 1126.14       | pituitary_gland              |
| RPS17  | 1629.02       | adrenal_gland                |
| RPS17  | 1670.09       | kidney                       |
| RPS17  | 1673.59       | bone_marrow                  |
| RPS17  | 1704.64       | thymus                       |
| RPS17  | 1712.12       | uterus                       |
| RPS17  | 1772.7        | small_intestine              |
| RPS17  | 2005.51       | Monocytes                    |
| RPS17  | 2009.22       | bladder                      |
| RPS17  | 2016.99       | trachea                      |
| RPS17  | 5841.69       | peripheral_blood_lymphocytes |
| RPS17  | 720.559       | testis                       |
| RPS17  | 882.843       | skeletal_muscle              |
| RPS17  | 888.875       | salivary_gland               |
| RPS3   | 1126.63       | bladder                      |
| RPS3   | 1180.52       | pituitary_gland              |
| RPS3   | 131.417       | kidney                       |
| RPS3   | 1432.13       | bone_marrow                  |
| RPS3   | 1679.16       | uterus                       |
| RPS3   | 1828.82       | small_intestine              |
| RPS3   | 1918.65       | thymus                       |
| RPS3   | 1950.89       | peripheral_blood_lymphocytes |
| RPS3   | 290.214       | skeletal_muscle              |
| RPS3   | 562.06        | Monocytes                    |
| RPS3   | 612.583       | salivary_gland               |
| RPS3   | 630.005       | testis                       |
| RPS3   | 794.203       | trachea                      |
| RPS3   | 889.955       | adrenal_gland                |
| RPS4Y1 | 100.124       | Monocytes                    |
| RPS4Y1 | 161.705       | pituitary_gland              |
| RPS4Y1 | 168.433       | bladder                      |
| RPS4Y1 | 182.386       | adrenal_gland                |
| RPS4Y1 | 194.948       | trachea                      |
| RPS4Y1 | 296.783       | thymus                       |
| RPS4Y1 | 6.73462       | small_intestine              |
| RPS4Y1 | 68.1471       | salivary_gland               |

*Supplementary file 8*

| RBPs   | Tag frequency | Tissue                       |
|--------|---------------|------------------------------|
| RPS4Y1 | 68.8826       | testis                       |
| RPS4Y1 | 83.6653       | skeletal_muscle              |
| RPS4Y1 | 86.316        | peripheral_blood_lymphocytes |
| RPS4Y1 | 91.3242       | bone_marrow                  |
| RPS5   | 11.2289       | bladder                      |
| RPS5   | 127.45        | adrenal_gland                |
| RPS5   | 179.018       | trachea                      |
| RPS5   | 181.086       | small_intestine              |
| RPS5   | 266.683       | skeletal_muscle              |
| RPS5   | 269.92        | peripheral_blood_lymphocytes |
| RPS5   | 300.332       | uterus                       |
| RPS5   | 35.7929       | thymus                       |
| RPS5   | 5.80109       | pituitary_gland              |
| RPS5   | 61.143        | testis                       |
| RPS5   | 73.3322       | salivary_gland               |
| RPS5   | 86.4813       | bone_marrow                  |
| RPS5   | 9.10218       | Monocytes                    |
| RPS9   | 1193.441      | bone_marrow                  |
| RPS9   | 2441.719      | peripheral_blood_lymphocytes |
| RPS9   | 281.4769      | salivary_gland               |
| RPS9   | 295.8556      | pituitary_gland              |
| RPS9   | 338.9954      | testis                       |
| RPS9   | 385.2094      | skeletal_muscle              |
| RPS9   | 502.103       | small_intestine              |
| RPS9   | 516.084       | kidney                       |
| RPS9   | 569.704       | thymus                       |
| RPS9   | 632.87        | uterus                       |
| RPS9   | 694.0419      | Monocytes                    |
| RPS9   | 699.384       | trachea                      |
| RPS9   | 776.29        | bladder                      |
| RPS9   | 781.548       | adrenal_gland                |
| MRPS15 | 10.1519       | pituitary_gland              |
| MRPS15 | 10.9724       | peripheral_blood_lymphocytes |
| MRPS15 | 12.4533       | bone_marrow                  |
| MRPS15 | 162.102       | skeletal_muscle              |
| MRPS15 | 168.724       | testis                       |
| MRPS15 | 18.2044       | Monocytes                    |
| MRPS15 | 18.5182       | salivary_gland               |
| MRPS15 | 21.7092       | bladder                      |
| MRPS15 | 24.7156       | uterus                       |
| MRPS15 | 30.342        | trachea                      |
| MRPS15 | 38.0299       | thymus                       |
| MRPS15 | 40.4077       | small_intestine              |
| MRPS15 | 43.9484       | adrenal_gland                |
| MRPS15 | 8.21355       | kidney                       |
| RTCD1  | 10.877        | pituitary_gland              |
| RTCD1  | 3.48605       | skeletal_muscle              |
| RTCD1  | 3.65746       | peripheral_blood_lymphocytes |



*Supplementary file 8*

| RBPs   | Tag frequency | Tissue                       |
|--------|---------------|------------------------------|
| RTCD1  | 3.72842       | thymus                       |
| RTCD1  | 4.39484       | adrenal_gland                |
| RTCD1  | 4.44438       | salivary_gland               |
| RTCD1  | 4.49375       | uterus                       |
| RTCD1  | 9.72778       | small_intestine              |
| SNRPB2 | 104.396       | thymus                       |
| SNRPB2 | 129.074       | pituitary_gland              |
| SNRPB2 | 22.6594       | skeletal_muscle              |
| SNRPB2 | 23.9562       | kidney                       |
| SNRPB2 | 24.2736       | trachea                      |
| SNRPB2 | 24.7668       | testis                       |
| SNRPB2 | 25.031        | Monocytes                    |
| SNRPB2 | 30.6799       | small_intestine              |
| SNRPB2 | 39.5535       | adrenal_gland                |
| SNRPB2 | 39.9994       | salivary_gland               |
| SNRPB2 | 41.1726       | bladder                      |
| SNRPB2 | 43.4396       | uterus                       |
| SNRPB2 | 60.7138       | peripheral_blood_lymphocytes |
| SNRPB2 | 7.61035       | bone_marrow                  |
| SAFB2  | 103.1581      | Monocytes                    |
| SAFB2  | 119.1902      | testis                       |
| SAFB2  | 152.1193      | thymus                       |
| SAFB2  | 17.4467       | trachea                      |
| SAFB2  | 20.7555       | bone_marrow                  |
| SAFB2  | 23.5309       | skeletal_muscle              |
| SAFB2  | 31.4963       | adrenal_gland                |
| SAFB2  | 34.8143       | salivary_gland               |
| SAFB2  | 38.3299       | kidney                       |
| SAFB2  | 5.85193       | peripheral_blood_lymphocytes |
| SAFB2  | 66.5979       | small_intestine              |
| SAFB2  | 66.62472      | bladder                      |
| SAFB2  | 71.1511       | uterus                       |
| SAFB2  | 89.9168       | pituitary_gland              |
| SART3  | 4.84295       | bone_marrow                  |
| SCAND1 | 10.2669       | kidney                       |
| SCAND1 | 109.129       | testis                       |
| SCAND1 | 14.8157       | skeletal_muscle              |
| SCAND1 | 16.296        | salivary_gland               |
| SCAND1 | 23.9295       | pituitary_gland              |
| SCAND1 | 24.2725       | Monocytes                    |
| SCAND1 | 31.3188       | thymus                       |
| SCAND1 | 32.9171       | peripheral_blood_lymphocytes |
| SCAND1 | 4.48974       | small_intestine              |
| SCAND1 | 8.34406       | trachea                      |
| SCAND1 | 95.2215       | adrenal_gland                |
| SCAND1 | 97.3646       | uterus                       |
| SF1    | 101.809       | bladder                      |
| SF1    | 133.895       | testis                       |

*Supplementary file 8*

| RBPs   | Tag frequency | Tissue                       |
|--------|---------------|------------------------------|
| SF1    | 141.367       | adrenal_gland                |
| SF1    | 15.0582       | kidney                       |
| SF1    | 170.61        | small_intestine              |
| SF1    | 189.26        | pituitary_gland              |
| SF1    | 214.012       | thymus                       |
| SF1    | 235.922       | uterus                       |
| SF1    | 38.5179       | salivary_gland               |
| SF1    | 40.9611       | skeletal_muscle              |
| SF1    | 43.9939       | Monocytes                    |
| SF1    | 49.1213       | bone_marrow                  |
| SF1    | 67.511        | trachea                      |
| SF1    | 90.7049       | peripheral_blood_lymphocytes |
| SFPQ   | 103.694       | pituitary_gland              |
| SFPQ   | 116.86862     | testis                       |
| SFPQ   | 212.52042     | thymus                       |
| SFPQ   | 23.4077       | peripheral_blood_lymphocytes |
| SFPQ   | 25.27387      | skeletal_muscle              |
| SFPQ   | 47.18435      | uterus                       |
| SFPQ   | 48.8881       | salivary_gland               |
| SFPQ   | 57.61837      | small_intestine              |
| SFPQ   | 63.655        | kidney                       |
| SFPQ   | 68.2664       | Monocytes                    |
| SFPQ   | 74.1106       | bladder                      |
| SFPQ   | 75.0965       | trachea                      |
| SFPQ   | 78.1791       | bone_marrow                  |
| SFPQ   | 91.5591       | adrenal_gland                |
| SFRS11 | 108.8295      | kidney                       |
| SFRS11 | 118.9782      | small_intestine              |
| SFRS11 | 148.6527      | pituitary_gland              |
| SFRS11 | 153.2444      | testis                       |
| SFRS11 | 16.82433      | peripheral_blood_lymphocytes |
| SFRS11 | 177.1139      | bone_marrow                  |
| SFRS11 | 190.2355      | uterus                       |
| SFRS11 | 198.377       | bladder                      |
| SFRS11 | 20.74039      | salivary_gland               |
| SFRS11 | 284.8516      | thymus                       |
| SFRS11 | 390.6353      | Monocytes                    |
| SFRS11 | 48.8047       | skeletal_muscle              |
| SFRS11 | 56.4004       | adrenal_gland                |
| SFRS11 | 90.2676       | trachea                      |
| SFRS12 | 12.1368       | trachea                      |
| SFRS12 | 3.66237       | adrenal_gland                |
| SFRS12 | 4.48974       | small_intestine              |
| SFRS12 | 4.49375       | uterus                       |
| SFRS12 | 4.79124       | kidney                       |
| SFRS12 | 5.30961       | Monocytes                    |
| SFRS12 | 5.41773       | testis                       |
| SFRS12 | 6.71116       | thymus                       |

Frontiers in Bioscience  
 Do not distribute.

*Supplementary file 8*

| RBPs    | Tag frequency | Tissue                       |
|---------|---------------|------------------------------|
| SFRS1   | 106.197       | trachea                      |
| SFRS1   | 190.895       | thymus                       |
| SFRS1   | 212.417       | adrenal_gland                |
| SFRS1   | 22.7555       | Monocytes                    |
| SFRS1   | 286.595       | small_intestine              |
| SFRS1   | 29.2597       | peripheral_blood_lymphocytes |
| SFRS1   | 295.09        | uterus                       |
| SFRS1   | 488.016       | pituitary_gland              |
| SFRS1   | 62.2861       | kidney                       |
| SFRS1   | 68.1471       | salivary_gland               |
| SFRS1   | 77.4872       | bone_marrow                  |
| SFRS1   | 78.6022       | bladder                      |
| SFRS1   | 85.4083       | skeletal_muscle              |
| SFRS1   | 89.0056       | testis                       |
| SFRPS2  | 153.591       | bone_marrow                  |
| SFRPS2  | 161.775       | uterus                       |
| SFRPS2  | 166.873       | Monocytes                    |
| SFRPS2  | 177.96        | kidney                       |
| SFRPS2  | 236.058       | testis                       |
| SFRPS2  | 256.225       | skeletal_muscle              |
| SFRPS2  | 296.581       | pituitary_gland              |
| SFRPS2  | 326.386       | bladder                      |
| SFRPS2  | 468.43        | small_intestine              |
| SFRPS2  | 500.355       | thymus                       |
| SFRPS2  | 61.4805       | salivary_gland               |
| SFRPS2  | 65.1027       | peripheral_blood_lymphocytes |
| SFRPS2  | 80.572        | adrenal_gland                |
| SFRPS2B | 14.8157       | skeletal_muscle              |
| SFRPS2B | 15.5553       | salivary_gland               |
| SFRPS2B | 16.0928       | peripheral_blood_lymphocytes |
| SFRPS2B | 27.1015       | adrenal_gland                |
| SFRPS2B | 32.8101       | thymus                       |
| SFRPS2B | 32.9248       | small_intestine              |
| SFRPS2B | 35.95         | uterus                       |
| SFRPS2B | 4.55109       | Monocytes                    |
| SFRPS2B | 56.1259       | kidney                       |
| SFRPS2B | 6.22665       | bone_marrow                  |
| SFRPS2B | 88.4666       | pituitary_gland              |
| SFRPS2B | 90.2676       | trachea                      |
| SFRPS2B | 9.28754       | testis                       |
| SFRPS2B | 98.8142       | bladder                      |
| SFRPS3  | 100.2143      | peripheral_blood_lymphocytes |
| SFRPS3  | 100.6151      | testis                       |
| SFRPS3  | 139.9308      | small_intestine              |
| SFRPS3  | 153.0869      | adrenal_gland                |
| SFRPS3  | 161.5642      | Monocytes                    |
| SFRPS3  | 174.4669      | trachea                      |
| SFRPS3  | 175.1706      | bladder                      |

*Supplementary file 8*

| RBPs   | Tag frequency | Tissue                       |
|--------|---------------|------------------------------|
| SFRPS3 | 178.2187      | thymus                       |
| SFRPS3 | 187.9885      | uterus                       |
| SFRPS3 | 204.4885      | pituitary_gland              |
| SFRPS3 | 25.92552      | salivary_gland               |
| SFRPS3 | 78.4362       | skeletal_muscle              |
| SFRPS3 | 88.9801       | kidney                       |
| SFRPS3 | 93.3998       | bone_marrow                  |
| SFRS4  | 22.4487       | small_intestine              |
| SFRS4  | 3.45925       | bone_marrow                  |
| SFRS4  | 4.49375       | uterus                       |
| SFRPS5 | 12.8948       | Monocytes                    |
| SFRPS5 | 18.9638       | trachea                      |
| SFRPS5 | 22.4792       | pituitary_gland              |
| SFRPS5 | 24.7668       | testis                       |
| SFRPS5 | 25.4419       | small_intestine              |
| SFRPS5 | 3.48605       | skeletal_muscle              |
| SFRPS5 | 55.9264       | thymus                       |
| SFRPS5 | 7.31491       | peripheral_blood_lymphocytes |
| SFRPS5 | 83.1344       | uterus                       |
| SFRPS5 | 8.78968       | adrenal_gland                |
| SFRS6  | 13.4812       | uterus                       |
| SFRS6  | 13.6533       | Monocytes                    |
| SFRS6  | 18.7148       | bladder                      |
| SFRS6  | 27.59037      | thymus                       |
| SFRS6  | 28.435        | small_intestine              |
| SFRS6  | 29.6315       | skeletal_muscle              |
| SFRS6  | 30.9585       | testis                       |
| SFRS6  | 34.42622      | adrenal_gland                |
| SFRS6  | 49.9657       | kidney                       |
| SFRS6  | 58.4084       | trachea                      |
| SFRS6  | 6.9185        | bone_marrow                  |
| SFRS6  | 87.74139      | pituitary_gland              |
| SFRS7  | 165.317       | peripheral_blood_lymphocytes |
| SFRS7  | 208.292       | skeletal_muscle              |
| SFRS7  | 215.857       | bone_marrow                  |
| SFRS7  | 230.664       | kidney                       |
| SFRS7  | 294.945       | bladder                      |
| SFRS7  | 295.09        | uterus                       |
| SFRS7  | 346.46        | adrenal_gland                |
| SFRS7  | 362.214       | testis                       |
| SFRS7  | 368.369       | pituitary_gland              |
| SFRS7  | 43.703        | salivary_gland               |
| SFRS7  | 454.372       | trachea                      |
| SFRS7  | 469.521       | Monocytes                    |
| SFRS7  | 518.565       | small_intestine              |
| SFRS7  | 675.591       | thymus                       |
| SFRPS9 | 194.729       | uterus                       |
| SFRPS9 | 199.997       | salivary_gland               |

*Supplementary file 8*

| RBPs    | Tag frequency | Tissue                       |
|---------|---------------|------------------------------|
| SFRPS9  | 219.316       | bone_marrow                  |
| SFRPS9  | 237.956       | small_intestine              |
| SFRPS9  | 24.4024       | skeletal_muscle              |
| SFRPS9  | 307.213       | trachea                      |
| SFRPS9  | 309.421       | peripheral_blood_lymphocytes |
| SFRPS9  | 314.168       | kidney                       |
| SFRPS9  | 330.878       | bladder                      |
| SFRPS9  | 396.704       | thymus                       |
| SFRPS9  | 441.681       | adrenal_gland                |
| SFRPS9  | 443.058       | pituitary_gland              |
| SFRPS9  | 513.137       | testis                       |
| SFRPS9  | 675.079       | Monocytes                    |
| SIAHBP1 | 119.393       | adrenal_gland                |
| SIAHBP1 | 161.775       | uterus                       |
| SIAHBP1 | 26.0096       | kidney                       |
| SIAHBP1 | 27.8884       | skeletal_muscle              |
| SIAHBP1 | 31.8514       | salivary_gland               |
| SIAHBP1 | 50.8229       | trachea                      |
| SIAHBP1 | 5.24014       | bladder                      |
| SIAHBP1 | 56.3248       | peripheral_blood_lymphocytes |
| SIAHBP1 | 58.9091       | thymus                       |
| SIAHBP1 | 60.6115       | small_intestine              |
| SIAHBP1 | 68.1628       | pituitary_gland              |
| SIAHBP1 | 79.5628       | bone_marrow                  |
| SIAHBP1 | 90.5536       | testis                       |
| SIAHBP1 | 9.8607        | Monocytes                    |
| SLBP    | 4.48974       | small_intestine              |
| SLBP    | 5.99167       | uterus                       |
| SNRPA   | 12.2012       | skeletal_muscle              |
| SNRPA   | 12.4354       | peripheral_blood_lymphocytes |
| SNRPA   | 20.1335       | thymus                       |
| SNRPA   | 32.2052       | uterus                       |
| SNRPA   | 6.73462       | small_intestine              |
| SNRPA   | 6.82696       | trachea                      |
| SNRPA   | 7.40729       | salivary_gland               |
| SNRPA   | 7.58515       | Monocytes                    |
| SNRPA   | 8.78968       | adrenal_gland                |
| SON     | 131.1091      | salivary_gland               |
| SON     | 136.8924      | kidney                       |
| SON     | 154.2577      | skeletal_muscle              |
| SON     | 202.0036      | testis                       |
| SON     | 246.9358      | small_intestine              |
| SON     | 274.595151    | trachea                      |
| SON     | 286.71        | bladder                      |
| SON     | 315.434       | pituitary_gland              |
| SON     | 321.55557     | adrenal_gland                |
| SON     | 349.7637      | uterus                       |
| SON     | 362.5699      | Monocytes                    |

*Supplementary file 8*

| RBPs  | Tag frequency | Tissue                       |
|-------|---------------|------------------------------|
| SON   | 709.89237     | thymus                       |
| SON   | 71.2606       | bone_marrow                  |
| SON   | 96.5569       | peripheral_blood_lymphocytes |
| SPF45 | 110.9458      | pituitary_gland              |
| SPF45 | 124.6077      | testis                       |
| SPF45 | 124.6268      | skeletal_muscle              |
| SPF45 | 135.02186     | trachea                      |
| SPF45 | 138.49        | bladder                      |
| SPF45 | 143.6715      | small_intestine              |
| SPF45 | 249.05905     | thymus                       |
| SPF45 | 28.14776      | salivary_gland               |
| SPF45 | 49.0099       | peripheral_blood_lymphocytes |
| SPF45 | 50.062        | Monocytes                    |
| SPF45 | 59.33028      | adrenal_gland                |
| SPF45 | 77.8917       | uterus                       |
| SPF45 | 80.94645      | bone_marrow                  |
| SPF45 | 82.81995      | kidney                       |
| SR140 | 127.43641     | trachea                      |
| SR140 | 133.9978      | bladder                      |
| SR140 | 134.2572      | Monocytes                    |
| SR140 | 147.6456      | thymus                       |
| SR140 | 19.01882      | peripheral_blood_lymphocytes |
| SR140 | 30.67996      | small_intestine              |
| SR140 | 33.11751      | skeletal_muscle              |
| SR140 | 37.036429     | salivary_gland               |
| SR140 | 40.8192       | bone_marrow                  |
| SR140 | 41.0677       | kidney                       |
| SR140 | 43.2159       | adrenal_gland                |
| SR140 | 54.17738      | testis                       |
| SR140 | 65.90832      | uterus                       |
| SR140 | 73.23871      | pituitary_gland              |
| SRP14 | 145.505       | testis                       |
| SRP14 | 158.434       | bone_marrow                  |
| SRP14 | 201.016       | trachea                      |
| SRP14 | 202.895       | adrenal_gland                |
| SRP14 | 230.08        | skeletal_muscle              |
| SRP14 | 233.467       | small_intestine              |
| SRP14 | 247.244       | peripheral_blood_lymphocytes |
| SRP14 | 271.872       | uterus                       |
| SRP14 | 338.364       | bladder                      |
| SRP14 | 344.506       | thymus                       |
| SRP14 | 465.434       | kidney                       |
| SRP14 | 851.813       | Monocytes                    |
| SRP14 | 91.1097       | salivary_gland               |
| SRP14 | 94.9928       | pituitary_gland              |
| SRP68 | 4.49375       | uterus                       |
| SRP72 | 132.74        | Monocytes                    |
| SRP72 | 23.5151       | trachea                      |

*Supplementary file 8*

| RBPs   | Tag frequency | Tissue                       |
|--------|---------------|------------------------------|
| SRP72  | 28.8884       | salivary_gland               |
| SRP72  | 34.8605       | skeletal_muscle              |
| SRP72  | 46.394        | small_intestine              |
| SRP72  | 49.4312       | uterus                       |
| SRP72  | 49.5336       | testis                       |
| SRP72  | 50.0344       | pituitary_gland              |
| SRP72  | 54.8619       | peripheral_blood_lymphocytes |
| SRP72  | 54.9355       | adrenal_gland                |
| SRP72  | 66.366        | thymus                       |
| SRP72  | 83.022        | bone_marrow                  |
| SRP72  | 88.9801       | kidney                       |
| SRP72  | 99.5627       | bladder                      |
| SRrp35 | 5.80109       | pituitary_gland              |
| STAU1  | 11.7039       | peripheral_blood_lymphocytes |
| STAU1  | 133.4699      | kidney                       |
| STAU1  | 136.244       | bladder                      |
| STAU1  | 25.35329      | thymus                       |
| STAU1  | 28.82356      | Monocytes                    |
| STAU1  | 30.95848      | testis                       |
| STAU1  | 3.70365       | salivary_gland               |
| STAU1  | 38.0518       | bone_marrow                  |
| STAU1  | 41.941658     | uterus                       |
| STAU1  | 42.783        | pituitary_gland              |
| STAU1  | 48.8048       | skeletal_muscle              |
| STAU1  | 57.6499       | trachea                      |
| STAU1  | 68.0944       | small_intestine              |
| STAU1  | 75.4447       | adrenal_gland                |
| STAU2  | 101.096       | skeletal_muscle              |
| STAU2  | 11.3783       | trachea                      |
| STAU2  | 13.4692       | small_intestine              |
| STAU2  | 15.953        | pituitary_gland              |
| STAU2  | 20.212        | bladder                      |
| STAU2  | 20.5092       | adrenal_gland                |
| STAU2  | 4.44438       | salivary_gland               |
| STAU2  | 6.84462       | kidney                       |
| STAU2  | 8.23854       | uterus                       |
| STRBP  | 10.4854       | uterus                       |
| STRBP  | 11.2289       | bladder                      |
| STRBP  | 14.9658       | small_intestine              |
| STRBP  | 154.792       | testis                       |
| STRBP  | 16.4271       | kidney                       |
| STRBP  | 18.68         | bone_marrow                  |
| STRBP  | 26.6663       | salivary_gland               |
| STRBP  | 34.1348       | trachea                      |
| STRBP  | 42.0579       | pituitary_gland              |
| STRBP  | 42.504        | thymus                       |
| STRBP  | 5.12044       | peripheral_blood_lymphocytes |
| STRBP  | 6.59226       | adrenal_gland                |

*Supplementary file 8*

| RBPs    | Tag frequency | Tissue                       |
|---------|---------------|------------------------------|
| SUPV3L1 | 19.1733       | skeletal_muscle              |
| SUPV3L1 | 3.0342        | trachea                      |
| SUPV3L1 | 3.62568       | pituitary_gland              |
| SUPV3L1 | 6.1917        | testis                       |
| SUPV3L1 | 6.59226       | adrenal_gland                |
| SUPV3L1 | 8.2312        | small_intestine              |
| SUPV3L1 | 8.94822       | thymus                       |
| SUPV3L1 | 9.73646       | uterus                       |
| GARS    | 128.478       | testis                       |
| GARS    | 14.0739       | salivary_gland               |
| GARS    | 202.313       | pituitary_gland              |
| GARS    | 28.7599       | skeletal_muscle              |
| GARS    | 29.0577       | bone_marrow                  |
| GARS    | 40.424        | bladder                      |
| GARS    | 41.695        | peripheral_blood_lymphocytes |
| GARS    | 45.1745       | kidney                       |
| GARS    | 58.5978       | adrenal_gland                |
| GARS    | 60.6115       | small_intestine              |
| GARS    | 66.366        | thymus                       |
| GARS    | 67.5079       | Monocytes                    |
| GARS    | 68.1552       | uterus                       |
| GARS    | 85.7163       | trachea                      |
| HARS    | 11.2344       | uterus                       |
| HARS    | 4.38895       | peripheral_blood_lymphocytes |
| HARS    | 5.98633       | small_intestine              |
| HARS    | 6.1006        | skeletal_muscle              |
| MARS    | 12.3203       | kidney                       |
| MARS    | 140.055       | uterus                       |
| MARS    | 160.322       | thymus                       |
| MARS    | 19.1733       | skeletal_muscle              |
| MARS    | 211.292       | testis                       |
| MARS    | 27.407        | salivary_gland               |
| MARS    | 39.8825       | pituitary_gland              |
| MARS    | 40.4077       | small_intestine              |
| MARS    | 44.1669       | bladder                      |
| MARS    | 44.621        | peripheral_blood_lymphocytes |
| MARS    | 63.7153       | Monocytes                    |
| MARS    | 64.4576       | adrenal_gland                |
| MARS    | 65.2354       | trachea                      |
| MARS    | 96.859        | bone_marrow                  |
| SYNJ2   | 7.48958       | uterus                       |
| SYWC    | 11.2244       | small_intestine              |
| SYWC    | 16.6881       | trachea                      |
| SYWC    | 19.3491       | testis                       |
| SYWC    | 3.62568       | pituitary_gland              |
| SYWC    | 4.39484       | adrenal_gland                |
| SYWC    | 4.49375       | uterus                       |
| SYWC    | 5.85193       | peripheral_blood_lymphocytes |



*Supplementary file 8*

| RBPs   | Tag frequency | Tissue                       |
|--------|---------------|------------------------------|
| SYWC   | 5.96548       | thymus                       |
| TACC1  | 18.8535       | pituitary_gland              |
| TACC1  | 20.0448       | skeletal_muscle              |
| TACC1  | 250.778       | bladder                      |
| TACC1  | 253.671       | small_intestine              |
| TACC1  | 28.3659       | bone_marrow                  |
| TACC1  | 36.4087       | Monocytes                    |
| TACC1  | 38.5179       | salivary_gland               |
| TACC1  | 41.695        | peripheral_blood_lymphocytes |
| TACC1  | 422.412       | uterus                       |
| TACC1  | 43.1211       | kidney                       |
| TACC1  | 56.4004       | adrenal_gland                |
| TACC1  | 62.2012       | trachea                      |
| TACC1  | 70.8401       | thymus                       |
| TACC1  | 99.0671       | testis                       |
| TARDBP | 4.39484       | adrenal_gland                |
| TARDBP | 7.97649       | pituitary_gland              |
| TARB1  | 10.2669       | kidney                       |
| TARB1  | 12.1368       | trachea                      |
| TARB1  | 13.1845       | adrenal_gland                |
| TARB1  | 14.9792       | uterus                       |
| TARB1  | 17.8011       | testis                       |
| TARB1  | 208.114       | pituitary_gland              |
| TARB1  | 21.4811       | salivary_gland               |
| TARB1  | 21.7878       | skeletal_muscle              |
| TARB1  | 44.1492       | small_intestine              |
| TARB1  | 54.435        | thymus                       |
| TDRKH  | 37.92417      | testis                       |
| Tenr   | 431.871       | testis                       |
| TIA1   | 11.0696       | bone_marrow                  |
| TIA1   | 15.2279       | pituitary_gland              |
| TIA1   | 17.4459       | Monocytes                    |
| TIA1   | 17.80111      | testis                       |
| TIA1   | 18.70726      | small_intestine              |
| TIA1   | 27.7115       | uterus                       |
| TIA1   | 43.99542      | thymus                       |
| TIA1   | 8.23451       | bladder                      |
| TIA1   | 8.34406       | trachea                      |
| TIA1   | 9.58247       | kidney                       |
| TIA1   | 9.58665       | skeletal_muscle              |
| TIAR   | 13.94425      | skeletal_muscle              |
| TIAR   | 15.74262      | kidney                       |
| TIAR   | 18.71483      | bladder                      |
| TIAR   | 18.96286      | Monocytes                    |
| TIAR   | 24.139191     | peripheral_blood_lymphocytes |
| TIAR   | 29.58351      | trachea                      |
| TIAR   | 33.69378      | adrenal_gland                |
| TIAR   | 3.70365       | salivary_gland               |

*Supplementary file 8*

| RBPs   | Tag frequency | Tissue                       |
|--------|---------------|------------------------------|
| TIAR   | 47.89064      | small_intestine              |
| TIAR   | 48.7596       | testis                       |
| TIAR   | 56.6721       | thymus                       |
| TIAR   | 60.9114       | pituitary_gland              |
| TIAR   | 63.6614       | uterus                       |
| TNRC6C | 11.931        | thymus                       |
| TNRC6C | 3.09585       | testis                       |
| TRA2A  | 114.266       | adrenal_gland                |
| TRA2A  | 118.23        | small_intestine              |
| TRA2A  | 12.5924       | salivary_gland               |
| TRA2A  | 13.1452       | bone_marrow                  |
| TRA2A  | 146.796       | uterus                       |
| TRA2A  | 201.335       | thymus                       |
| TRA2A  | 24.1392       | peripheral_blood_lymphocytes |
| TRA2A  | 24.6406       | kidney                       |
| TRA2A  | 25.7895       | Monocytes                    |
| TRA2A  | 46.4127       | bladder                      |
| TRA2A  | 48.8048       | skeletal_muscle              |
| TRA2A  | 68.1087       | testis                       |
| TRA2A  | 78.3147       | pituitary_gland              |
| TRA2A  | 81.165        | trachea                      |
| TRA2B  | 100.069       | pituitary_gland              |
| TRA2B  | 105.509       | small_intestine              |
| TRA2B  | 109.226       | Monocytes                    |
| TRA2B  | 12.3203       | kidney                       |
| TRA2B  | 177.473       | thymus                       |
| TRA2B  | 22.9626       | salivary_gland               |
| TRA2B  | 23.5309       | skeletal_muscle              |
| TRA2B  | 55.6679       | adrenal_gland                |
| TRA2B  | 63.6303       | bladder                      |
| TRA2B  | 73.5794       | trachea                      |
| TRA2B  | 77.5381       | peripheral_blood_lymphocytes |
| TRA2B  | 83.7139       | bone_marrow                  |
| TRA2B  | 92.8708       | uterus                       |
| TRA2B  | 92.8755       | testis                       |
| TRBP2  | 15.3819       | adrenal_gland                |
| TRBP2  | 21.2384       | Monocytes                    |
| TRBP2  | 22.4487       | small_intestine              |
| TRBP2  | 24.9066       | bone_marrow                  |
| TRBP2  | 25.5407       | testis                       |
| TRBP2  | 3.48605       | skeletal_muscle              |
| TRBP2  | 41.7584       | thymus                       |
| TRBP2  | 4.79124       | kidney                       |
| TRBP2  | 5.07595       | pituitary_gland              |
| TRBP2  | 61.4805       | salivary_gland               |
| TRBP2  | 9.10261       | trachea                      |
| TRBP2  | 9.7317        | bladder                      |
| TRBP2  | 9.73646       | uterus                       |

*Supplementary file 8*

| RBPs    | Tag frequency | Tissue                       |
|---------|---------------|------------------------------|
| TRSPAP1 | 11.7614       | bone_marrow                  |
| TRSPAP1 | 14.7053       | testis                       |
| TRSPAP1 | 15.7141       | small_intestine              |
| TRSPAP1 | 20.212        | bladder                      |
| TRSPAP1 | 21.2384       | Monocytes                    |
| TRSPAP1 | 23.2043       | pituitary_gland              |
| TRSPAP1 | 39.5213       | thymus                       |
| TRSPAP1 | 4.44438       | salivary_gland               |
| TRSPAP1 | 6.58342       | peripheral_blood_lymphocytes |
| TRSPAP1 | 7.48958       | uterus                       |
| TRSPAP1 | 9.10261       | trachea                      |
| TUT1    | 10.6197       | trachea                      |
| TUT1    | 11.2289       | bladder                      |
| TUT1    | 121.512       | testis                       |
| TUT1    | 14.4118       | Monocytes                    |
| TUT1    | 20.2219       | uterus                       |
| TUT1    | 22.2219       | salivary_gland               |
| TUT1    | 23.2043       | pituitary_gland              |
| TUT1    | 32.8101       | thymus                       |
| TUT1    | 4.10677       | kidney                       |
| TUT1    | 5.23804       | small_intestine              |
| TUT1    | 52.5806       | bone_marrow                  |
| TUT1    | 7.32473       | adrenal_gland                |
| U2AF1   | 129.712       | trachea                      |
| U2AF1   | 130.203       | small_intestine              |
| U2AF1   | 131.845       | adrenal_gland                |
| U2AF1   | 145.79        | kidney                       |
| U2AF1   | 153.536       | uterus                       |
| U2AF1   | 171.169       | peripheral_blood_lymphocytes |
| U2AF1   | 205.114       | bladder                      |
| U2AF1   | 229.093       | testis                       |
| U2AF1   | 293.344       | bone_marrow                  |
| U2AF1   | 300.511       | thymus                       |
| U2AF1   | 329.212       | pituitary_gland              |
| U2AF1   | 363.329       | Monocytes                    |
| U2AF1   | 36.6036       | skeletal_muscle              |
| U2AF1   | 77.0358       | salivary_gland               |
| HDLBP   | 3.65746       | peripheral_blood_lymphocytes |
| YBOX1   | 101.47992     | salivary_gland               |
| YBOX1   | 114.8471      | bone_marrow                  |
| YBOX1   | 1401.3963     | skeletal_muscle              |
| YBOX1   | 15.22787      | pituitary_gland              |
| YBOX1   | 161.6303      | small_intestine              |
| YBOX1   | 1705.039      | testis                       |
| YBOX1   | 181.159       | bladder                      |
| YBOX1   | 290.4017      | peripheral_blood_lymphocytes |
| YBOX1   | 296.7824      | thymus                       |
| YBOX1   | 299.628       | trachea                      |

*Supplementary file 8*

| RBPs   | Tag frequency | Tissue                       |
|--------|---------------|------------------------------|
| YBOX1  | 387.6018      | Monocytes                    |
| YBOX1  | 416.7773      | adrenal_gland                |
| YBOX1  | 42.4367       | kidney                       |
| YBOX1  | 492.8142      | uterus                       |
| YBOX2  | 10.877        | pituitary_gland              |
| YBOX2  | 3187.95       | testis                       |
| YBOX2  | 43.4009       | small_intestine              |
| YBOX2  | 54.814        | salivary_gland               |
| YBOX2  | 6.73733       | bladder                      |
| ZCRB1  | 17.7775       | salivary_gland               |
| ZCRB1  | 20.2219       | uterus                       |
| ZCRB1  | 21.2384       | Monocytes                    |
| ZCRB1  | 21.998        | trachea                      |
| ZCRB1  | 25.4419       | small_intestine              |
| ZCRB1  | 40.267        | thymus                       |
| ZCRB1  | 43.1211       | kidney                       |
| ZCRB1  | 45.4133       | adrenal_gland                |
| ZCRB1  | 50.0344       | pituitary_gland              |
| ZCRB1  | 54.6472       | bladder                      |
| ZCRB1  | 6.58342       | peripheral_blood_lymphocytes |
| ZCRB1  | 81.266        | testis                       |
| ZCRB1  | 88.0229       | skeletal_muscle              |
| ZNF638 | 10.9871       | adrenal_gland                |
| ZNF638 | 13.0727       | skeletal_muscle              |
| ZNF638 | 19.5787       | pituitary_gland              |
| ZNF638 | 24.7156       | uterus                       |
| ZNF638 | 34.3015       | thymus                       |
| ZNF638 | 4.44438       | salivary_gland               |
| ZNF638 | 6.96566       | testis                       |
| ZNF638 | 7.58515       | Monocytes                    |
| ZNF638 | 8.97949       | small_intestine              |

*Supplementary file 9*

**Supplementary data. List of RBPs that are expressed in only one tissue**

**IREB2**

**KHDRBS2**

**LARP5**

**LOC161931**

**Q8TC92**

**RED2**

**RKHD3**

**Tenr**

©2009 Landes Bioscience.

Do not distribute.

# Supplementary fig 10

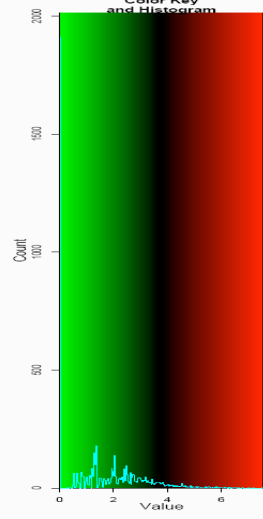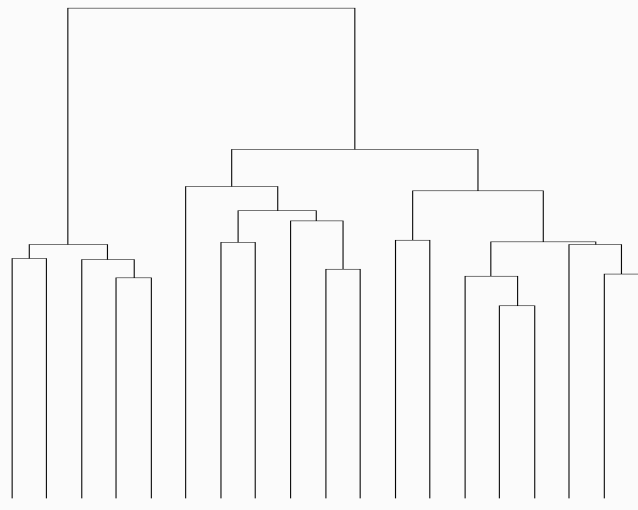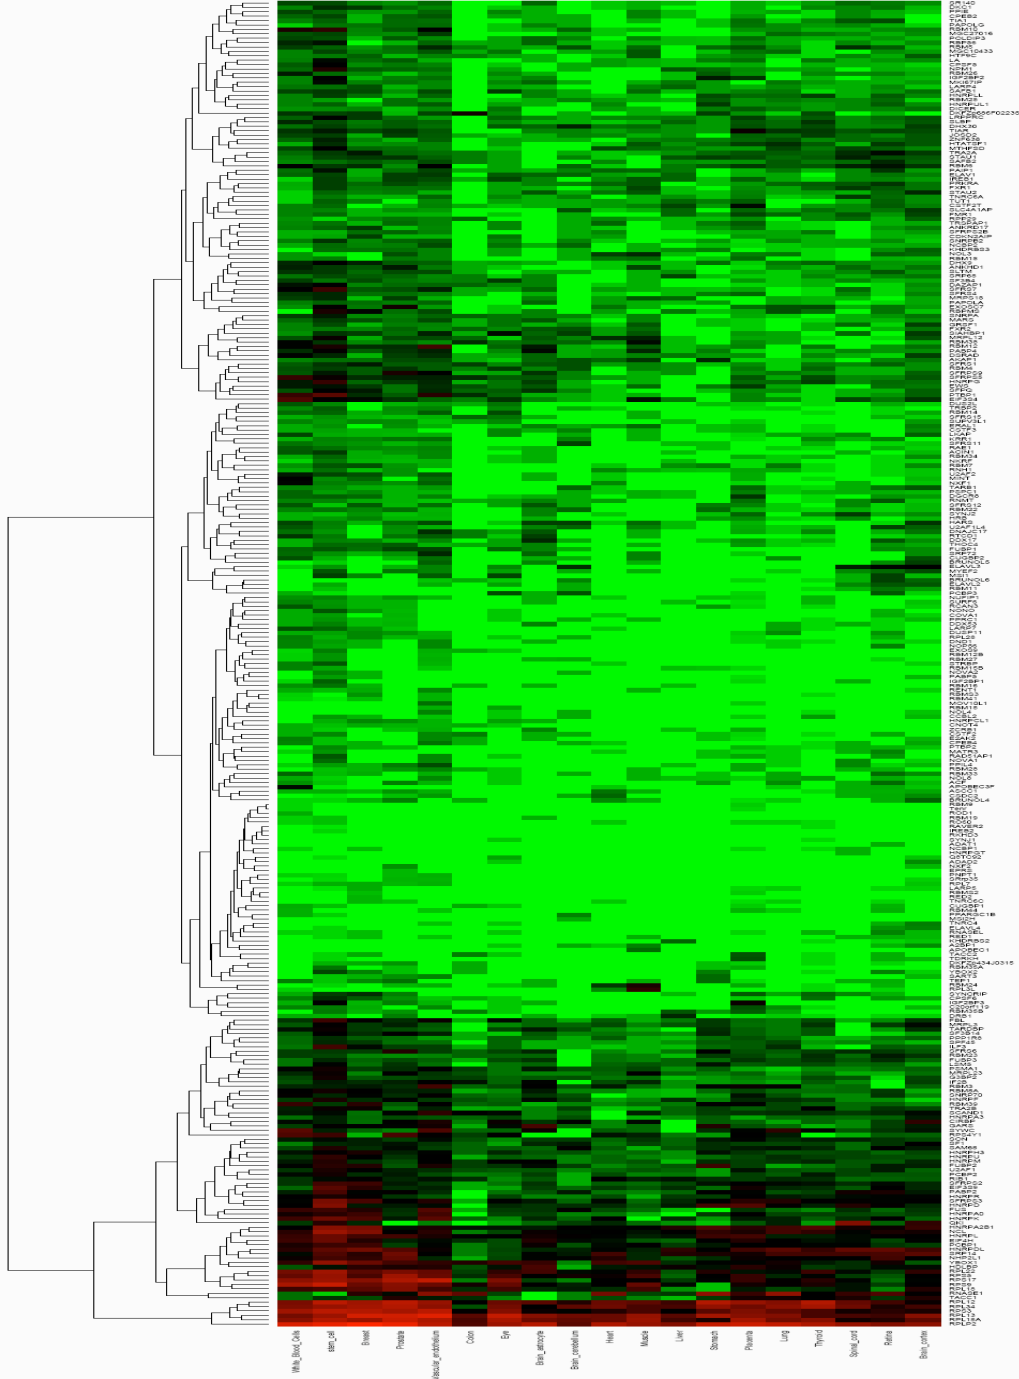

*Supplementary file 11*

**UNDER 10X**

| <b>Tissue</b>        | <b>Gene</b>    | <b>Ratio [Normal / Tumor]</b> |
|----------------------|----------------|-------------------------------|
| Brain_cortex         | BRUNOL5        | 19.2151                       |
| Colon                | RNASE1         | 38.13329921                   |
| Liver                | IREB1          | 12.0649                       |
| Liver                | MRPS15         | 12.0649                       |
| Lung                 | EXOSC7         | 15.7821                       |
| Lung                 | FMR1           | 11.2729                       |
| Lung                 | HTATSF1        | 24.8005                       |
| Lung                 | LSM5           | 15.7821                       |
| Lung                 | MGC27016       | 11.2729                       |
| Lung                 | PPP1R8         | 11.2729                       |
| Lung                 | RBPMS          | 15.7821                       |
| Lung                 | RPS4Y1         | 31.5642                       |
| Lung                 | ZNF638         | 15.7821                       |
| Thyroid              | CPSF6          | 10.3504                       |
| Vascular_endothelium | BRUNOL5        | 12.8602                       |
| Vascular_endothelium | DKFZp686F02235 | 18.63321                      |
| Vascular_endothelium | IGF2BP2        | 10.4683                       |
| Vascular_endothelium | KRR1           | 10.4683                       |
| Vascular_endothelium | MOV10L1        | 10.4683                       |
| Vascular_endothelium | MSI1           | 13.9577                       |
| Vascular_endothelium | NCBP2          | 17.4471                       |
| Vascular_endothelium | NPM1           | 10.4683                       |
| Vascular_endothelium | PAPOLG         | 10.88753                      |
| Vascular_endothelium | RBP56          | 11.6185                       |
| Vascular_endothelium | RPS4Y1         | 50.3466                       |
| Vascular_endothelium | RTCD1          | 13.9577                       |
| Vascular_endothelium | SR140          | 11.23507                      |
| Vascular_endothelium | SRP72          | 27.1097                       |
| White_Blood_Cells    | APOBEC3F       | 37.1575                       |
| White_Blood_Cells    | ACIN1          | 15.488                        |
| White_Blood_Cells    | RCAN3          | 14.863                        |
| White_Blood_Cells    | CPEB2          | 12.14256                      |
| White_Blood_Cells    | CUGBP2         | 15.7471                       |
| White_Blood_Cells    | DHX30          | 10.1188                       |
| White_Blood_Cells    | DHX9           | 25.7131                       |
| White_Blood_Cells    | DSRAD          | 13.01117714                   |
| White_Blood_Cells    | DUS2L          | 15.488                        |
| White_Blood_Cells    | HNRPD          | 15.37399412                   |
| White_Blood_Cells    | HNRPL          | 27.04828207                   |
| White_Blood_Cells    | LARP7          | 16.1901                       |
| White_Blood_Cells    | LKAP           | 18.007                        |

*Supplementary file 11*

| <b>Tissue</b>     | <b>Gene</b> | <b>Ratio [Normal / Tumor]</b> |
|-------------------|-------------|-------------------------------|
| White_Blood_Cells | LRPPRC      | 13.41787                      |
| White_Blood_Cells | MINT        | 44.0796                       |
| White_Blood_Cells | NPM1        | 11.0199                       |
| White_Blood_Cells | PCBP2       | 12.15422998                   |
| White_Blood_Cells | POLDIP3     | 18.3665                       |
| White_Blood_Cells | SF3B14      | 14.0055                       |
| White_Blood_Cells | PPP1R8      | 11.1472                       |
| White_Blood_Cells | PPIE        | 18.5787                       |
| White_Blood_Cells | PSPC1       | 11.616                        |
| White_Blood_Cells | RAE1        | 14.1663                       |
| White_Blood_Cells | RBM10       | 10.40891787                   |
| White_Blood_Cells | RBM26       | 30.9759                       |
| White_Blood_Cells | RBM3        | 27.526                        |
| White_Blood_Cells | RBM4        | 16.1901                       |
| White_Blood_Cells | RBM6        | 14.73168908                   |
| White_Blood_Cells | RBP56       | 27.1039                       |
| White_Blood_Cells | MRPL12      | 15.7291                       |
| White_Blood_Cells | RPS4Y1      | 111.472                       |
| White_Blood_Cells | RTCD1       | 22.2945                       |
| White_Blood_Cells | SF3B4       | 20.2376                       |
| White_Blood_Cells | SFRS12      | 15.17547                      |
| White_Blood_Cells | SFRS7       | 45.7322                       |
| White_Blood_Cells | SLBP        | 25.7131                       |
| White_Blood_Cells | SNRPA       | 19.36                         |
| White_Blood_Cells | SRP14       | 11.53048732                   |
| White_Blood_Cells | SRP72       | 11.0199                       |
| White_Blood_Cells | TACC1       | 10.0039                       |
| White_Blood_Cells | TARDBP      | 11.37540367                   |
| White_Blood_Cells | ZNF638      | 11.8548                       |



## Supplementary file 12

| GENES     | White Blood Cells | Vascular endothelium | Thyroid      | Lung         | Prostate     | Breast       | Liver        | Brain cortex | Brain astrocyte | Stomach      | Colon       | Brain cerebellum |
|-----------|-------------------|----------------------|--------------|--------------|--------------|--------------|--------------|--------------|-----------------|--------------|-------------|------------------|
| FUBP2     | -1.128216331      | -1.208860052         | -2.154699745 | 1.595363396  | 0.061282693  | -0.530322388 | 0.81231804   | 0.907716332  | 0.304652522     | -0.455177416 | 1.367162708 | 1.20686575       |
| RPS17     | 0.943810252       | -1.168746962         | 0.125883545  | 0.737910841  | -0.398092752 | 1.67291522   | 1.576152867  | 1.725879847  | 2.588401811     | 1.282520736  | 3.208622381 | 3.275212766      |
| RL3L      | 0                 | 0                    | 0            | 0            | 0            | 1.815677798  | 0            | 1.207947893  | 0               | 0            | 0           | 0                |
| RB15B     | -2.005726377      | 0                    | 0            | 0            | 0            | 1.196482824  | -1.104007707 | 2.47443535   | 1.76766143      | 2.047554769  | 1.279396553 | 1.940218267      |
| SFRS6     | -1.86131343       | 0.159273477          | -0.273238439 | 0.978429127  | 0.210637108  | 1.74867926   | 1.192493347  | 1.348822639  | 0.392101607     | 0.215499382  | 1.506266115 | 4.154449834      |
| MK67I     | -2.054672301      | -0.823773395         | -1.643874121 | -2.199261391 | 0.857237685  | 1.017910898  | -2.202618891 | 1.991588174  | 0.586296421     | 1.635115297  | 2.666527961 | 1.401195607      |
| DKFZp434. | 0                 | 0                    | 0            | 0            | 0            | -0.550132401 | 0.788296398  | 0            | 1.690792989     | 2.222739616  | 0           | -0.201455943     |
| SLBP      | -3.24700059       | -0.234875614         | -1.538903958 | 0.203063761  | 0.176730348  | 1.155546408  | -0.097828911 | 0.625665469  | 1.384657214     | 1.374812209  | 2.711318189 | 2.171032589      |
| RAVR2     | 0                 | 0                    | 0            | 0            | 0            | 1.248238463  | 0            | 0            | 1.362196322     | 0            | 0           | 1.247072523      |
| RM03      | -0.940918417      | 0.534111423          | -0.239623618 | 0.580358803  | -0.211154104 | 0.676382218  | 0.694535373  | 0.337983396  | 1.257602703     | 0.087085491  | 4.09761255  | 1.07242198       |
| FLJ40411  | -1.312580542      | 0                    | 0            | 0            | 0            | 1.25440733   | 0            | 0            | 0               | 1.125085429  | 1.185019316 | 0                |
| HNRPU     | 0.519189095       | -0.125978966         | -0.391020248 | -0.074569515 | -0.187122299 | 0.417415869  | 1.140817507  | 1.229555738  | 0.892979086     | 0.995953344  | 2.550654457 | 2.157298253      |
| SRP68     | -2.237550449      | -0.823773395         | -0.360250147 | 0            | -0.654431877 | -0.064467227 | -0.87408176  | 0.577217612  | 0.882568016     | 2.220189954  | 0.659837951 | 3.031671165      |
| RBM18     | -1.770326414      | -2.047128813         | 0            | 0            | 0.014942316  | 2.996200164  | 2.415722689  | 1.502511079  | 2.172442238     | 1.952360728  | 2.601361396 | 0.927077203      |
| SIAHBP1   | 0.717609734       | -0.976210389         | 1.571308124  | 1.394690701  | 0.990661463  | 1.410502311  | 2.3924715    | 1.262534147  | 1.246255241     | 3.427670522  | 2.450219584 | 0.313048879      |
| SUPV3L1   | -2.046915767      | 2.358095483          | 0            | 1.526855984  | -0.047489806 | 0.939816172  | 0.224527766  | 1.525320647  | 2.389789785     | 2.047554769  | 0.983881802 | 2.027892952      |
| TUT1      | 0                 | -0.277933952         | 2.082132917  | 1.802193182  | 2.206760081  | 0.942450473  | 0.59531827   | 1.11569372   | 1.567759465     | 0.602336242  | 2.888837248 | 1.609568905      |
| DGCR8     | -1.34638518       | -0.378365341         | 0            | 2.495342012  | -1.21609602  | 0.44418865   | -1.104007707 | 0.939091036  | 1.064881409     | 2.276367393  | 2.020682288 | 1.137955501      |
| TACC2     | 1.105998278       | 2.217723041          | 0            | 0            | 0            | 0.513523864  | 0            | 1.860156163  | 1.387553568     | 1.153993383  | -0.72652886 | 0                |
| SFRS7     | -3.822802645      | -2.223709355         | 1.165840938  | 1.932321092  | 0.206906087  | -0.108334533 | 0.883000513  | 2.066584656  | 0.435184918     | 2.837513497  | 2.069888935 | 3.724998969      |
| RL18      | -0.375994305      | 0.18742626           | 0.586679918  | 1.276908946  | 0.296706118  | -0.134389785 | 1.894602085  | 0.743742687  | 1.65409318      | 4.311510282  | 2.329867075 | 1.575256707      |
| Q8TC92    | 0                 | 0                    | 0            | 1.396729723  | 1.108146691  | 1.19394065   | 0            | 1.343446879  | 1.315426519     | 1.223648953  | 1.972543734 | 1.10388503       |
| RBM9      | 0                 | 0                    | 0            | 0            | 0            | 0            | 1.328535473  | 0            | 0               | 0            | 1.279396553 | 1.212375403      |
| KHDR3     | 0                 | 0.027100398          | 1.165840938  | 1.396729723  | -1.206564581 | -0.564265367 | -0.468617757 | 0.730612584  | 3.527477548     | 0.438640473  | 0           | 2.104588499      |
| DJC17     | -1.208396801      | -1.125232206         | -0.765715255 | 2.913149259  | 1.447580257  | 2.7335035    | 2.021682653  | 0.3316921    | -0.73482434     | 1.354408879  | 0.911729869 | 2.230450864      |
| DUS2L     | -2.740065531      | -1.637850427         | 0            | 0            | -0.04749136  | 2.597237814  | 1.328535473  | 1.958499145  | 1.735719841     | 1.223648953  | 1.317192076 | 1.940218267      |
| ACINU     | -2.740065531      | -1.948009373         | 0            | 0            | -0.608082513 | 1.228025435  | 0.224527766  | 1.240186428  | -1.357104966    | 0            | 2.378007915 | 1.196434462      |
| PRGC1     | 0                 | 1.119110752          | 0            | 0            | 0            | 0            | 0            | 0            | 0               | 0            | 0           | 0                |
| LOC16193  | 0                 | 0                    | 0            | 0            | 0            | 0            | 0            | -0.506637697 | 0               | 0            | 0           | 0                |
| HNRPD     | -2.732677389      | 0.310966907          | 0.313096335  | -0.23708632  | 0.62800911   | 0.596340305  | 0.777639692  | 1.086225491  | 1.211083152     | 0.150958479  | 4.712678394 | 1.885563581      |
| RS5       | -0.925702509      | 0.026278187          | 0.480818218  | 1.625210063  | -0.030383122 | 0.6542796    | 2.016288451  | 1.707008757  | 1.814127104     | 1.277612348  | 2.54020618  | 1.364604926      |
| RBMS3     | 0                 | -1.254863618         | 0            | 0            | 1.16860466   | -1.757271539 | 0            | 1.255581849  | 0               | 0            | 0           | 0                |
| RBM15     | 0                 | -1.353982924         | 0            | 0            | 0            | 0            | 0            | 0            | 0               | 0            | 0           | 0                |
| RBM41     | 0                 | -1.249738399         | 0            | 0            | 1.861753395  | 0            | 0            | 1.718068077  | 0               | 0            | 1.185019316 | 1.099628439      |
| HNRPCL1   | 1.105998278       | -1.254863618         | 0            | 2.220003164  | 0.435542532  | -0.038298949 | 0            | 2.449054922  | -1.357104966    | 1.451217964  | 2.571313678 | 2.198239618      |
| IF39      | -1.34638518       | -0.130627847         | -0.146671034 | -1.207999861 | 0.386773952  | 0.136079105  | 1.329289273  | 1.4275994    | 1.257858362     | 1.597875107  | 2.524328168 | 2.192832382      |
| SLTM      | -2.011077795      | -1.05289033          | 0.774730676  | 2.220003164  | -1.007704686 | 1.163420829  | 0.18985499   | 1.506955311  | 1.617653385     | 2.627680718  | 1.250982869 | 1.45022233       |
| RNH1      | -1.386684285      | 0                    | 0            | -1.506115319 | -0.723528762 | 2.309560707  | 0.189853332  | 1.948729029  | 1.355319557     | 2.252605672  | 1.59916533  | 1.334745771      |
| SFR12     | -2.719680308      | -0.683401449         | 0            | 2.089875666  | -0.030381581 | 0.157615399  | 0            | 1.95723506   | -0.154249678    | 0.768072574  | 3.233557914 | 1.952219988      |
| SFRS2     | -1.366732916      | 0.616241952          | 0.384193626  | -0.266939575 | 0.013947638  | -0.299265854 | 0.477533614  | 1.031130577  | 0.73151017      | 0.361172357  | 1.909789146 | 3.718591552      |
| PRKRA     | -0.280686007      | -0.812826221         | 0.150576723  | -1.025675441 | -0.245977729 | 1.044632336  | 1.293861039  | 1.156668799  | 1.162550876     | 2.763431296  | 2.528996898 | 1.620794939      |
| RPL7      | 0                 | -1.353982924         | 0            | 0            | 0.030076388  | 0.52798596   | 1.328535473  | 1.350444361  | 0               | 1.354408879  | 1.612706565 | 2.70963021       |
| RED1      | 0                 | 0                    | 0            | 0            | 0            | 1.831098765  | 0            | 0.423333088  | 1.542487953     | 0            | 0           | 1.766209156      |
| RBM12     | -0.479558328      | -1.81751317          | -0.583393699 | 3.211387054  | -0.070978754 | 1.05684602   | 1.993304143  | 1.906349308  | -0.13828098     | 1.408041451  | 4.449593807 | 1.670377835      |
| MATR3     | 1.105998278       | 0                    | 0            | 0            | 0            | 1.500763021  | 0            | 2.168432936  | 1.831966875     | 1.153993383  | 0           | 2.171674264      |
| PAIP1     | -0.515247966      | -0.002830549         | -0.072568075 | 0.243884216  | 0.196269677  | 1.954052269  | -0.908757852 | 1.941067941  | 1.470311018     | 2.767258919  | 1.439157817 | 1.443188289      |
| BRUNOL6   | 0                 | 0                    | 0            | 0            | 1.16860466   | 2.30193288   | 0            | -0.403507083 | 1.728100561     | 0            | -0.03338292 | 1.001584313      |
| IGF2BP3   | -1.312580542      | -1.249738399         | 1.165840938  | 0            | -2.12420217  | -1.234759008 | 2.021682653  | 2.383943857  | 0.550629981     | 0            | 1.88581735  | 3.444295185      |
| PCBP3     | -1.312580542      | 0                    | 0            | 0            | 0            | 0            | 0            | 1.265351965  | 0.698239817     | 1.223648953  | 0           | -0.984154737     |
| MINT      | -3.78599709       | 0.579873703          | 0            | 1.396729723  | 1.199814169  | 0.727252162  | 0            | 0.801308601  | 1.09682688      | 0            | 2.794460286 | 1.792775619      |
| IF2B2     | -2.067266475      | -2.348351643         | -0.072568075 | 0            | -2.12420217  | 0.92848674   | 2.863584339  | 1.179369805  | 0.417101344     | 0.318012304  | 3.226264462 | 3.336157401      |
| RU2B      | -2.091251528      | -0.971081133         | 0.843723904  | 0.178296718  | -0.66307084  | 0.308656616  | 0.917674946  | 3.259595414  | 2.718666976     | 0.844105581  | 2.292313521 | 5.23685231       |
| TIA1      | -2.046915767      | -1.234367055         | -0.36024807  | 2.604922746  | -1.209560418 | 1.965075475  | 1.293861039  | 3.516424264  | 1.440137344     | 2.097131645  | 2.053890373 | 2.920547849      |
| RBM34     | -1.37411803       | -0.823773395         | 0.332899111  | 1.526855984  | 0.676865329  | 1.148139896  | 0            | 0.955141694  | 0.915843262     | 2.223696636  | 1.972543734 | 2.202498424      |
| CSDC2     | 0                 | -1.637850427         | 0            | 0            | 0            | 1.372372906  | 0            | -0.493741634 | 2.067223454     | 1.818230986  | 0           | 0.710260529      |
| PCBP1     | -0.23637071       | 0.601852959          | 0.014445387  | -2.17648342  | 0.04620427   | -0.252943659 | -0.36975924  | 1.148546222  | -0.416790467    | 0.643433761  | 1.670347241 | 1.376363428      |

Supplementary file 12

| GENES    | White        | Blood Cells | Vascular endothelium | Thyroid      | Lung         | Prostate     | Breast       | Liver        | Brain cortex | Brain astrocyte | Stomach      | Colon        | Brain cerebellum |
|----------|--------------|-------------|----------------------|--------------|--------------|--------------|--------------|--------------|--------------|-----------------|--------------|--------------|------------------|
| TIAR     | -1.99833949  |             | -0.378364395         | 0.15057852   | -0.895549623 | -1.240772866 | 0.679182841  | 0.18985499   | 0.421060051  | 1.426900833     | 1.757545359  | 2.761305935  | 1.511759509      |
| PABP4    | 0.062199609  |             | -0.600626577         | 0.332899111  | 2.443146716  | -0.091411009 | 0.60491742   | 0.883000513  | 1.207821738  | -0.45612277     | -0.254505131 | 4.193957593  | 1.804702374      |
| U2AF2    | -1.63406237  |             | -0.518739675         | 0            | 1.396729723  | -0.631861284 | 0.437081467  | 0            | 2.221797942  | 0.185382987     | 2.144363973  | 2.308368338  | 1.499933266      |
| SAFB1    | 0.668889716  |             | 0.051697864          | 0            | 0.583760219  | 0.435542532  | 0.932791187  | 0.917674946  | 0.702918359  | 0.651471417     | 0.743528189  | 2.985459691  | 1.69002308       |
| NH2L1    | -1.047327218 |             | 0.667642583          | 0.11667269   | -1.131936277 | -0.747572034 | 0.219613616  | 1.91092834   | 0.724070215  | 0.492973725     | 0.748613991  | 3.968085349  | 0.657249872      |
| PNPT1    | 0            |             | -1.353982924         | 0            | 0            | 0.030076388  | 1.210946432  | 2.021682653  | 1.363340424  | 1.310964489     | 1.223648953  | 1.185019316  | 1.499933266      |
| HTSF1    | -1.386684285 |             | 0.027100398          | -0.765715146 | -3.210863814 | -0.107947678 | 1.528193204  | -1.79715323  | 0.520492382  | 3.441638504     | -0.341776666 | 1.360743193  | 2.996147187      |
| NOL4     | 0            |             | -2.043315535         | 0            | 0            | 0            | 0            | 1.198668763  | 0            | 0               | 0            | 0            | -0.131552504     |
| SRR35    | 0            |             | -0.130627647         | 0            | 0            | -1.21609602  | 0            | 0            | 1.267372865  | 0               | 0            | 0            | 1.10388503       |
| RO60     | 0            |             | 0                    | 0            | 1.526855984  | 1.199814169  | 1.19394065   | 0            | 1.901095074  | 1.355319557     | 1.223648953  | 0            | 1.544400067      |
| EXOS9    | 0            |             | -1.353982924         | 0            | 0            | 1.108146691  | 2.04035502   | 0            | 1.97847414   | 0               | 1.847140564  | -1.394126113 | 2.198239618      |
| RLA2     | 0.126358409  |             | 0.479478487          | 0.235155884  | -0.651352388 | -0.343280741 | -0.524883495 | 2.066790222  | 1.626275589  | 0.569935048     | 0.486164981  | 2.250706074  | 2.055342646      |
| RBM26    | -3.433209483 |             | 0.41008611           | -0.765715255 | 1.802193182  | 1.817831618  | 0.858852228  | 0.224527766  | 1.342724305  | 0.997797397     | -1.258062439 | 1.878168026  | 3.004131898      |
| SRP14    | -2.444994599 |             | 0.438800733          | -0.036198443 | -1.684007909 | -0.937273477 | 0.780405439  | 0.27686607   | -0.040710221 | 1.409006575     | 0.303995292  | 0.707188233  | 1.496965027      |
| PTBP2    | 0            |             | 1.119110752          | 0            | 1.396729723  | 0.66276725   | 0.913024896  | 0            | 2.651649147  | 2.15397487      | 1.818230986  | 2.528995303  | 2.805872375      |
| FMR1     | -2.005726377 |             | -1.249738399         | 0.487050384  | -2.422401615 | -0.107949329 | 1.328852827  | 0.189857732  | 0.028447202  | 2.716547331     | 0.150959977  | 2.571313678  | 1.625387868      |
| LKAP     | -2.890760571 |             | -1.353982924         | -1.238409013 | 0.020740665  | 0.061285896  | 1.36031432   | 1.328535473  | 0.107342154  | 2.609944785     | 2.001407025  | 1.19267017   | 3.0057584129     |
| PABP2    | 0.198883396  |             | 0.220922893          | 0.525266818  | -0.826555295 | -0.700855223 | 0.932513648  | 0.447670326  | 0.115419877  | 1.686851932     | 0.710573939  | 3.152500952  | 1.106758181      |
| SYHC     | -1.816017485 |             | -1.745190778         | 1.165840938  | 0            | 0.240187749  | 0.638252362  | -1.104007707 | 0.064592607  | -0.611637941    | 1.746561595  | 3.152500952  | -0.785564515     |
| NONO     | -0.263223675 |             | 0                    | 0            | 0            | 0.232325122  | -0.256508517 | 1.293861039  | 2.691798861  | 1.137021775     | 2.223696636  | 2.794460286  | 1.940218267      |
| RBM8A    | -0.815869545 |             | -0.144046091         | -0.072570901 | 0.947694772  | 0.024531849  | 0.860840195  | 1.83396303   | 2.325404164  | 0.076468692     | 1.046150583  | 3.129492745  | 1.941910775      |
| HNRPD    | -0.301835923 |             | 0.867552035          | -0.404701092 | -0.913567861 | -0.887013858 | 0.16138832   | 1.060778576  | 0.386917252  | 1.783000091     | 0.557086803  | 1.184841175  | 2.180050992      |
| A2BP1    | 0            |             | 0                    | 0            | 0            | 0            | 0            | 0            | -1.857082058 | 1.426502567     | 0            | 0            | 0.331767108      |
| SFPQ     | -1.649514222 |             | -1.582338145         | 0            | 0.868041245  | 0.723223568  | -0.380158904 | 2.427145113  | 1.497824913  | -0.623752838    | 1.818230986  | 1.090181712  | 1.254742398      |
| CSTF2    | -1.301090441 |             | -1.942884147         | 0            | 1.932321092  | 1.16860466   | 1.146662497  | 0            | 1.87495106   | 0.185382987     | 1.153993383  | -0.72652886  | 0.387584129      |
| RL34     | -0.719618019 |             | 0.492062823          | -0.35420443  | -0.069410913 | -0.042493144 | 0.026780641  | 0.940157976  | 1.296044058  | 2.144510494     | 0.4727776481 | 2.057776582  | 1.446826436      |
| PAPOA    | -2.091251528 |             | 0.458272655          | -1.238409013 | 0.713887845  | -0.262448775 | 0.705563225  | -1.104007707 | 1.207976745  | 0.011635378     | 0.844105581  | 1.616828534  | 1.942768075      |
| PP1R8    | -2.411188345 |             | -0.518739675         | 1.431510014  | -2.422401615 | -0.144669843 | 0.126332923  | 0.189853332  | 0.620530121  | 0.57928295      | 0.150954733  | 0.491691237  | 1.997022041      |
| YBOX1    | 0.244378169  |             | 0.145374222          | -0.07256768  | 0.10572699   | -0.344179212 | -0.231998693 | 1.002742493  | 3.002853395  | 0.254422375     | 1.255034329  | 0.972645278  | 3.36351141       |
| EPRS     | 0            |             | 0                    | 0            | 0            | -1.138528273 | 0            | 0            | 1.265351965  | 0               | 0            | 0            | 1.10388503       |
| TEP1     | -2.079831466 |             | 1.664950194          | 0            | 1.396729723  | -0.496879655 | 0.507555769  | 1.198668763  | 2.279630644  | 1.09682688      | -0.542190871 | 1.360743193  | 2.433358937      |
| RBM7     | -0.686151115 |             | 0.458275009          | 1.858989677  | -2.199261391 | 0.101602414  | -0.55413936  | -0.468617757 | 0.562147645  | 1.792369283     | 0.050380427  | 2.308368338  | 2.459358046      |
| ELAV1    | 0.263052733  |             | -0.541219606         | 0            | 0.682909062  | 0.136352996  | 2.543546164  | -0.503292191 | 1.177195133  | 0.802718457     | 2.290824204  | 2.399513962  | 0.661492476      |
| FBRL     | -0.388903821 |             | -0.423430385         | -0.988857248 | 1.500053425  | 0.658683446  | -0.0238113   | 1.576149255  | 1.374154559  | 0.939149277     | 0.844108469  | 2.821268734  | 2.864178333      |
| RB35B    | 0            |             | 0                    | 0            | 0.713887845  | 1.015383664  | 1.439314625  | -1.384906831 | 0            | 0               | 0.448183387  | 0.372085993  | 0                |
| NOL8     | -1.37411803  |             | -1.948009373         | -1.643874121 | -1.506115319 | 1.124682813  | 1.887087831  | 0.224527766  | 2.354190339  | 2.485514798     | 1.153993383  | 1.972543734  | 3.004131898      |
| CIRBP    | -1.816018522 |             | -1.359524696         | 0.060966532  | 1.970053472  | 0.887530871  | 1.316426483  | 1.293861039  | 0.171589343  | 0.864267406     | 0.220612605  | 1.870335986  | -0.324877616     |
| NOP56    | -2.046915767 |             | -0.82889862          | 0            | 0            | 0            | 0.579719611  | 0            | 1.788146283  | 0               | 1.223648953  | 0            | 1.792775619      |
| SART3    | 0            |             | -2.047128813         | 0            | 2.220003164  | -0.663070793 | -0.040432722 | 0            | 0.794564268  | 1.661758978     | -0.542190871 | 2.802111116  | 2.89564671       |
| PSA1     | -0.973833187 |             | -0.928017403         | 0.150576723  | 3.878230413  | 0.836162093  | 0.664247367  | 0.629991883  | 1.763648811  | -0.507765045    | 0.709837966  | 1.366878221  | 1.047021833      |
| SYNJ2    | -0.195092162 |             | 0.458275009          | 0.620580664  | 1.526855984  | 1.124682813  | 0.433921552  | 2.021682653  | 0.685782131  | 0.867446151     | 2.609942579  | 1.88581735   | 1.334745771      |
| FUBP3    | -0.085797598 |             | 0.20942332           | -0.334933231 | -0.826555295 | -1.024235446 | 0.933451371  | 0.189857732  | 1.37151238   | 0.508069315     | 0.815193913  | 1.758374839  | 3.812021438      |
| CPEB2    | -2.496716637 |             | -0.924201543         | 1.571306046  | 0            | -0.24546838  | 2.946771916  | 0.189853332  | 3.765831699  | 1.661233844     | 2.540287744  | 1.61521718   | 2.08051102       |
| ADAT1    | 0            |             | 1.119110752          | 0            | 0            | 0            | 1.248238463  | 0            | 0            | 0               | 0            | 0            | 0                |
| PAPOG    | 1.105998278  |             | -2.387618098         | 0.215115556  | -1.911580427 | -0.609962793 | 0.309879306  | 1.958855989  | 2.373005345  | 0.646752611     | 2.361794125  | 1.852155045  | 1.97698067       |
| G3BP2    | -0.705916683 |             | -0.668912565         | -0.177927205 | 0.737912264  | 1.07733847   | 0.409386267  | 0.917674946  | 0.225076504  | 0.323575818     | 0.562796342  | -0.201452909 | 0.919813494      |
| SR140    | -1.823473459 |             | -2.419040136         | 0.438258796  | 2.58394623   | 0.976150752  | 1.054655976  | 0.189853332  | 1.543680896  | 0.181931941     | 3.14816319   | 3.711568598  | 2.969798892      |
| LARP7    | -2.784399944 |             | 0                    | 1.571308124  | -1.506115319 | 1.124682813  | -0.502864209 | 0            | 2.65367145   | 1.985167949     | 1.354408879  | 0            | 1.247072523      |
| NUPL     | -1.312580542 |             | -0.130627647         | 0            | 1.396729723  | -0.091413207 | 0.240307137  | 0            | 0.892552727  | 0.473065594     | -0.542187203 | 1.279396553  | 2.403542931      |
| MGC10433 | 0.137345194  |             | -0.669862643         | 1.165840938  | 0.766085103  | 0.0612869    | 0.933454317  | 2.021682653  | 1.712093958  | 2.701723563     | 3.015407442  | 1.590302515  | 1.486195278      |
| SFRS2B   | -1.353768587 |             | -0.382178619         | 0.263906833  | 0.426205773  | 0.284427846  | 0.357327331  | 2.021682653  | 0.55559652   | 2.303194907     | 1.354408879  | 1.360743193  | 1.220041763      |
| TNRC4    | 0            |             | 0                    | 0            | 0            | 0            | 0            | 0            | -2.138841885 | 1.237684138     | 0            | 0            | 2.257719518      |
| NOVA1    | 0            |             | -1.948009373         | 0            | 0            | 1.16860466   | 1.25440733   | 0            | 2.651649147  | 2.414037018     | 0            | 0            | 1.544400067      |
| RL13     | 2.214950206  |             | -0.736000049         | 0.405466043  | 1.499566924  | 0.555271669  | 0.962215769  | 1.256781938  | 1.151707741  | 1.382865894     | 0.560266277  | 2.289291369  | 1.989343643      |
| HNRPR    | -1.259368146 |             | 0.93957527           | -0.008027995 | -1.232020403 | 0.32223738   | 0.907808649  | 0.323384513  | 0.643597603  | 2.484049124     | 0.507633873  | 3.677292585  | 2.517150947      |
| SFRS1    | 0.681240494  |             | -0.283059645         | 0.802899624  | 3.606296439  | 0.206858736  | 0.020007877  | 0.629991883  | 1.737679006  | 0.563525292     | 3.250638023  | 0.674014263  | 1.61765088       |
| TACC1    | -2.302975017 |             | 0.464155165          | -1.288961412 | -1.2914438   | -1.295382764 | 0.634954661  | -1.104007707 | -0.392504106 | 4.16875606      | 1.162560946  | 0.204008154  | 1.281051683      |

## Supplementary file 12

| GENES   | White Blood Cells | Vascular endothelium | Thyroid      | Lung         | Prostate     | Breast       | Liver        | Brain cortex | Brain astrocyte | Stomach      | Colon        | Brain cerebellum |
|---------|-------------------|----------------------|--------------|--------------|--------------|--------------|--------------|--------------|-----------------|--------------|--------------|------------------|
| AKAP1   | -2.005726377      | -1.052043597         | 1.180197565  | 2.313020455  | -0.091410243 | 1.258849438  | 1.328535473  | 0.512076983  | 0.292776412     | 0.581008747  | 1.177187565  | 0.418411792      |
| ZCRB1   | -1.353768587      | -1.353982924         | 1.165840938  | 0            | 0            | 1.923655776  | -1.104007707 | 1.752021956  | 0.012369989     | 1.916796134  | 0            | 1.915221166      |
| RBM39   | 0.066186534       | 0.419530106          | 0.332893096  | 0.632947331  | 0.681779816  | 0.018521604  | -0.180936237 | 2.401135059  | 1.69214343      | 0.262389232  | 1.672863721  | 1.8744467        |
| PDIP3   | -2.910528353      | -1.942884147         | 1.431510014  | 0.426205773  | -0.379097161 | 1.21960604   | 0.883000513  | 2.303836453  | 0.410554468     | 1.916796134  | 2.665692305  | 0.961753134      |
| RBM14   | -1.305190067      | 0.557395533          | 1.571308124  | 1.802193182  | 0.723223568  | 1.713151394  | 1.328535473  | 0.849782185  | 2.067223454     | 2.439708776  | 2.999001922  | 2.633362574      |
| DDX53   | -0.280686007      | 0                    | 0            | -1.506115319 | -1.21609602  | 1.146662497  | 0            | 2.383943857  | -0.694932589    | 0            | 0            | 0                |
| RBM10   | -2.342662927      | -1.707499514         | 0.332899111  | 0.531567767  | -0.395633265 | 2.011167847  | 1.293861039  | 2.530939338  | 1.384657214     | 2.763428142  | 3.950541549  | 0.008687164      |
| RBM16   | -1.774686214      | 2.217723041          | 1.165840938  | 1.526855984  | 1.124682813  | 0.985183651  | -1.104007707 | 2.160981205  | -0.041678447    | 1.746561595  | -0.114729559 | 1.099628439      |
| DND1    | -2.005726377      | -0.130626214         | 0            | 0            | 1.16860466   | -0.05489633  | 0            | 1.890012285  | 0.666296507     | 1.451217964  | 1.59916533   | 1.905522584      |
| ANKRD17 | -0.957510762      | -0.135752865         | 2.418605688  | 1.526855984  | 1.108146691  | -0.012406708 | 1.813304541  | 0.796038452  | 2.955045687     | 1.418735963  | 1.973380781  | 1.650454495      |
| STAU2   | 1.105998278       | 0.310969163          | -0.478033183 | -0.042207352 | 0.061620492  | 0.609670665  | 0.094661056  | -0.34504368  | 0.1182707       | 2.306120835  | 1.810419287  | 2.032380431      |
| SFR15   | -1.353768587      | 0.557394315          | 0            | 0            | 1.199814169  | 0.969763752  | 0            | 1.890012285  | -0.001785409    | 2.144363973  | -0.03376221  | 1.905522584      |
| TRA2B   | -0.895431115      | 0.313450345          | -0.254889008 | -0.058580256 | 1.240131246  | -0.104231063 | -0.063153478 | 1.03354383   | 1.337091041     | 0.562419708  | 1.877032816  | 0.856801397      |
| RBM33   | -1.366734571      | -1.353982924         | 0            | 0.020740665  | 1.124682813  | -0.179624828 | 0            | 0.305944372  | 2.048466737     | 1.223648953  | 1.279396553  | 0.858921153      |
| THOC4   | -0.247770308      | 0.415211795          | 0            | 0            | -0.83122621  | -0.213855914 | 1.328535473  | 1.005017247  | -0.041678447    | 2.223696636  | 2.082494091  | 3.402213532      |
| FXR2    | -2.067266475      | -1.948009373         | -1.238409013 | 2.220003164  | 0.030074786  | 0.66424993   | 0            | 1.230347817  | -0.743802246    | 2.367511039  | 0.659766685  | 0.505371703      |
| PPIL4   | 0                 | -1.740062693         | 0            | 0            | -2.12420217  | 0.762156537  | -1.104007707 | 1.494249081  | 1.985167949     | 1.832791042  | 1.985167949  | 1.212375403      |
| BRUNOL4 | 0                 | 0                    | 0            | 0            | -2.12420217  | -1.251379154 | 1.293861039  | -0.787258859 | 1.384715616     | 1.223648953  | -1.394126113 | 1.942768075      |
| RL22    | -0.4611176379     | -0.208943521         | -0.22338995  | 1.032341299  | -0.272777166 | 0.267725985  | 2.341616734  | 0.826454028  | 0.624356432     | 0.675569196  | 2.293742308  | 1.433724977      |
| PCBP2   | -2.497677255      | 1.003001536          | 0.502796984  | 0.531569246  | -0.091411434 | 0.460161187  | 1.037153081  | 1.508772017  | 0.818260507     | 1.606907702  | 1.779236716  | 3.346574559      |
| CNOT4   | 0.498056673       | 0.557394315          | 0            | 1.396729723  | 0.645657375  | 0.933453054  | 0            | 1.96629104   | 1.542487953     | 1.223648953  | 0.65976426   | 1.940218267      |
| LSM5    | -1.184410989      | 0.569359628          | 0.022741538  | -2.758876386 | 0.399873001  | 2.13567698   | 0.749471561  | 2.060263872  | 0.664276163     | 0.231002316  | 3.265422331  | 3.448131857      |
| PP1E    | -2.922015763      | -1.333487903         | 2.082132917  | 1.119350057  | 0.869879326  | 0.537824582  | -1.104007707 | 2.956944667  | 1.558782914     | 2.047554769  | 3.545075479  | 2.433358937      |
| SAFB2   | -1.99423626       | -1.74416555          | -2.154699745 | -0.042205166 | 0.207429342  | 0.694923757  | -0.503292191 | 1.070160877  | 3.88627844      | 1.746046768  | 0.710253154  | 3.090962905      |
| SF3B4   | -3.00754226       | -0.928018061         | -1.238409013 | 1.802193182  | 0.723223568  | 0.291119491  | 1.98700822   | 1.889327262  | 0.02979921      | 2.511378167  | 0.222705647  | 1.970036748      |
| LPPRC   | -2.596587401      | 0.10346451           | 0.150576926  | -2.199262499 | -0.160402319 | 0.958631663  | 1.393828338  | 0.542140524  | 0.915990038     | 1.081574144  | 3.140739133  | 2.2906728361     |
| BOLL    | 0                 | 0                    | 0            | 0            | 1.199814169  | 0            | 0            | 0            | 0               | 2.322261242  | 0            | 1.645642543      |
| RL28    | -2.079831466      | -0.234872172         | 0            | 0            | -0.030381581 | -0.141731315 | 0            | 1.587267965  | 2.222739616     | 2.047554769  | 2.713826818  | 0.304795421      |
| RBM27   | 0                 | -1.353982924         | 0            | 0            | 1.89296135   | 1.857687649  | 0            | 2.541391735  | 0.404126565     | 1.798114235  | 1.930120431  | 0.38673383       |
| MSI2H   | 0                 | 0                    | 0            | 0            | 0            | 0            | 0            | 0            | 0               | 0            | 0            | -0.274739997     |
| PABP5   | 0                 | 1.119110752          | 0            | 0            | 1.124682813  | 0.393945072  | 1.328535473  | 0.101417088  | 1.80574291      | 0            | 0            | 0                |
| SPF45   | -1.293704451      | -1.211886855         | 0.438258796  | -0.112788378 | -0.047493288 | 0.543079006  | 0.224529423  | 1.437620832  | 1.56329474      | 0.304374662  | 2.851931185  | 1.584527235      |
| RBM24   | 0                 | -1.353982924         | 0            | 0            | 0.754433077  | 2.16440405   | 0            | 1.762967256  | 1.794823038     | 0            | 1.185019316  | 2.790066345      |
| PAP1L   | -0.899728099      | -0.135751444         | 1.165840938  | -0.384722965 | 1.124682813  | 1.679448923  | 1.328535473  | 1.808840901  | 2.91588788      | 2.540286168  | 2.053890373  | 1.905522584      |
| CCBL2   | 0                 | 1.119110752          | -1.643874121 | 0            | 0            | -0.040432722 | 0            | 0.872657878  | 2.080051356     | 1.746561595  | 0            | 0.706003042      |
| RNAS1   | 1.511075668       | 0.484932337          | 0.174293561  | -1.000909539 | 0.075642607  | 0.570778551  | -1.158099931 | 1.781563283  | 4.784537383     | -0.843289824 | -3.641087895 | 2.311678424      |
| RM23    | -1.447853476      | -0.094498869         | -0.072570901 | 2.372115095  | -0.229813411 | 1.701719564  | -0.503292191 | 1.742193939  | 0.87014756      | 1.102879653  | 1.383694213  | 1.430010561      |
| LARP4   | -2.285239525      | 0.176515412          | 0.620580664  | -1.911580427 | -0.091413207 | 0.166249384  | -1.1964402   | 2.783367299  | 0.964234166     | 0.71512527   | 1.360743193  | 2.352125452      |
| RB12B   | 0                 | -1.249738399         | 0            | 0            | 1.100813198  | 0            | 0            | 1.165186237  | 0               | 0            | 0            | 0                |
| RBM23   | -1.872659044      | 0.870582457          | -2.018476568 | -0.109381161 | 0.676865329  | 0.800960831  | 0.224527766  | 0.780006694  | 0.540623975     | -0.571095864 | 0.08623178   | 3.550964181      |
| RPP29   | -1.803569456      | 0.02328712           | -0.072566517 | 0            | 0.27383986   | 0.652711479  | 0.787809744  | 0.314793645  | 1.792369283     | 1.354408879  | -0.474563259 | -0.131552504     |
| CCP3    | -2.698874903      | 0                    | 1.165840938  | 0            | -0.016281851 | 0.647792724  | 1.98700822   | 1.668936253  | 1.426502567     | -1.696180587 | 1.185019316  | 1.792775619      |
| IF2B    | -0.555803251      | -2.02663078          | -0.206098245 | 2.323325758  | 0.968348445  | 0.239848181  | 0.917673955  | 1.207819656  | -0.556966101    | 1.925364441  | 1.153090013  | 3.183327401      |
| ELAV2   | 0                 | -1.353982924         | 0            | 0            | 0            | 0            | 0            | -0.880771174 | 2.490449593     | 0            | 0            | 3.735306654      |
| JOS2    | -1.79618127       | -0.570739195         | -1.371851089 | 0.227086835  | -0.704283069 | 2.394865482  | 0.883004912  | 0.636564293  | 1.403354241     | 1.354408879  | 2.456332079  | 0.872415368      |
| TNR6C   | 0                 | 0                    | 0            | 0            | 0            | -1.251379154 | 0            | 1.207947893  | 0               | 0            | 0            | 0                |
| HNRPGT  | 0                 | 0                    | 0            | 0            | 0            | 0            | 0            | 1.18180388   | 1.730805627     | 0            | 0            | 1.173555864      |
| CSTF3   | -1.37411803       | 0                    | 0            | 0            | 1.561946553  | -0.023812576 | 0            | 0.520596803  | 0.473065594     | 2.144363973  | 1.616828534  | 0.414151852      |
| HNRH3   | -1.045873982      | 0.496807858          | -0.988858408 | 0.288133748  | -0.591239854 | -0.555505953 | 0.224527766  | 0.939771177  | 1.07175965      | -0.067068729 | 1.089248492  | 1.632841648      |
| NXF2    | 0                 | 0                    | 0            | 0            | -1.831675453 | 0            | 0            | -1.163934877 | 0               | 0            | 0            | 0                |
| HNRPM   | -0.568365395      | -0.536092955         | -0.701175176 | -0.109385596 | 0.645658785  | 0.093100233  | 1.323137406  | 0.726076627  | -0.024260641    | 0.409730842  | 1.109048516  | 1.740250491      |
| RBM4    | -2.784399944      | -0.565615394         | -0.22671606  | 1.932321092  | -0.091411009 | 0.094297876  | -0.468617757 | 1.443148844  | 0.762085996     | 2.734523341  | 0.626554765  | 0.996882003      |
| PSPC1   | -2.452383458      | -1.254863618         | -1.238409013 | 0            | -0.016281851 | 0.71279265   | 0.224527766  | 0.814539263  | 1.831966875     | 1.746561595  | 1.19267017   | 1.037601203      |
| ANKHD1  | -1.568106647      | 0.015337791          | 1.431510707  | 0.531567767  | -0.036829655 | 0.709196246  | 0.836536643  | 1.258807615  | 3.353026925     | 3.092440113  | 1.586485924  | 3.336777254      |
| ASCC1   | -1.301090441      | -1.353982924         | 0            | 0            | -0.518922892 | 1.109647839  | 1.98700822   | 0.520596336  | 2.996342088     | 1.223648953  | 1.19267017   | 1.766209156      |
| NADAP   | -2.046915767      | 0.174407506          | -1.171184228 | -1.506115319 | -0.030379931 | 1.34585866   | -0.063155298 | -0.410682078 | 2.483330408     | 2.252605672  | 1.88581735   | 0.484233326      |
| ELAV3   | 0                 | -2.043315535         | 0            | 0            | -1.21609602  | 1.25440733   | 0            | -0.460336871 | 3.18006015      | 0            | 0            | 1.29178729       |

Supplementary file 12

| GENES   | White        | Blood | Cells | Vascular     | endothelium | Thyroid      | Lung         | Prostate     | Breast       | Liver        | Brain        | cortex       | Brain        | astrocyte    | Stomach      | Colon       | Brain       | cerebellum |
|---------|--------------|-------|-------|--------------|-------------|--------------|--------------|--------------|--------------|--------------|--------------|--------------|--------------|--------------|--------------|-------------|-------------|------------|
| RBM3    | -3.315131013 |       |       | -2.040170617 |             | 1.536871084  | -0.826555476 | 0.455126665  | 0.534933439  | 0.59531827   | 1.935713362  | -0.400605541 | 0.402272657  |              | 0.889511325  |             | 0.784742007 |            |
| ROD1    | -1.369221953 |       |       | 0            | 0           | 0            | 0            | 0            | 0            | 0            | 0            | 0            | 0            | 0            | 0            | 0           | 0           | 0          |
| RB35A   | 0            |       |       | 0            | 0           | 0            | 0            | 1.124682813  | 2.236562805  | 1.98700822   | 0            | 0            | 0            | 1.354408879  | 0.205039217  | 0.253990204 |             |            |
| HNRPF   | -1.985435008 |       |       | -0.260584197 |             | -0.360248489 | -0.89784336  | -0.301525021 | 0.316243039  | -1.854912118 | 4.108866934  | 0.223546166  | 1.617297289  | 0.4971692754 | 1.041692754  | 0.253990204 |             |            |
| CPSF6   | -0.98525325  |       |       | 1.119110752  |             | -2.337025166 | 1.932321092  | 0.375084627  | -0.125107873 | 1.328535473  | 1.711433368  | 2.080051356  | 1.354408879  | 1.177187565  | 2.856510435  |             |             |            |
| PAPOB   | 0            |       |       | 0            | 0           | 0            | 0            | 0            | 0            | 1.328535473  | 0            | 0            | 0            | 0            | 0            | 0           | 0           | 0          |
| SF01    | -0.280684352 |       |       | 0.375079471  |             | -0.524552635 | 0.243885325  | -0.482366635 | 0.387048723  | -0.063155298 | -0.030529203 | 0.200657992  | -0.283413633 | 1.065233218  | 0.425384738  |             |             |            |
| EWS     | -0.268119946 |       |       | -0.012672759 |             | 2.082132917  | 0.989228342  | -1.037326392 | 0.495761316  | 1.293861039  | 1.631634119  | -0.138858215 | 0.122050941  | 1.035051542  | 1.66020505   |             |             |            |
| NOVA2   | 0            |       |       | 1.119110752  |             | 0            | 0            | 0            | -1.251379154 | 0            | 1.99865439   | 1.308259844  | 0            | 0            | -1.378625027 |             |             |            |
| IF34    | -0.73393241  |       |       | 0.310961936  |             | 0            | 1.883044698  | 0.896789307  | 0.864919894  | 0.512208295  | 0.871348163  | 1.09682688   | 3.070992796  | 1.805798484  | 2.009544527  |             |             |            |
| CPSF5   | -1.544869038 |       |       | -2.047130104 |             | 0.332899111  | 0            | 0.363452772  | 0.967817894  | 0.189853332  | 3.480562937  | 2.422477902  | 2.5369455    | 1.805798484  | 2.009544527  |             |             |            |
| MTHFS   | -1.816017485 |       |       | 0.716431778  |             | 0.620579106  | -1.090215389 | -1.206564581 | 0.572003148  | -0.180936237 | 2.106431178  | 3.464156531  | 1.249573317  | 2.531503935  | 3.291817689  |             |             |            |
| SON     | -1.646149826 |       |       | -0.522824571 |             | 0.038656852  | -0.137517935 | 0.352250269  | 0.327658943  | 0.59531827   | 1.553867406  | 0.984970674  | 0.106491846  | 0.802179837  | 1.130137998  |             |             |            |
| RTC1    | -3.104340011 |       |       | -2.636031327 |             | 0            | 1.396729723  | -0.030380481 | 1.906227386  | 0            | 1.24728038   | -1.242271264 | 1.818230986  | 0.372085993  | 1.537303683  |             |             |            |
| YBOX2   | 0            |       |       | 0            | 0           | 0            | 0            | 1.16860466   | 0.510978411  | 0            | 1.27314526   | 0            | -0.747236816 | 0.897156345  | 1.334745771  |             |             |            |
| TRBP2   | -0.888237982 |       |       | -2.047128813 |             | 0            | 2.779620193  | 0.357974784  | 2.445819261  | 0            | 2.616103027  | 1.71191327   | 2.252605672  | 2.865469818  | 1.512762881  |             |             |            |
| BRUNOL5 | 0            |       |       | -2.554137271 |             | 0            | 0            | 1.124682813  | 0            | 0            | -2.955696428 | -0.119420828 | 0            | 0            | 0            | 0           | 0           | 0          |
| RBM11   | 0            |       |       | 0            | 0           | 0            | 0            | 1.809596113  | 1.206024698  | 0            | 0.28722343   | 2.06438374   | 0            | 0            | 0.888046837  |             |             |            |
| RIB1    | 0.144083473  |       |       | -0.050515884 |             | -0.313730088 | 0.204021805  | 0.416017177  | 0.891531589  | 0.224527525  | 1.358692566  | 0.710104591  | 0.940884323  | 0.850307433  | 2.587232541  |             |             |            |
| NKRF    | 0            |       |       | -0.130627647 |             | 1.858989677  | 0            | -1.138528273 | 0.999213141  | 0.836536643  | 2.485719653  | 3.388559953  | 1.223648953  | 2.447367455  | 2.088885556  |             |             |            |
| RS3     | -0.474060256 |       |       | -0.497048859 |             | 0.354175422  | 1.050785832  | 0.063693053  | -0.14880804  | 2.139346547  | 2.534841241  | 0.929510798  | 0.666123095  | 2.014462634  | 1.853654103  |             |             |            |
| RKHD3   | 0            |       |       | 0            | 0           | 0            | 0            | 1.199814169  | 1.825938649  | 0            | 0            | 0            | 0            | 0            | 0            | 0           | 0           | 0          |
| U2AF1   | -0.940918969 |       |       | 0.07874186   |             | 0.24588364   | 0.024145223  | -0.281693999 | -0.309229952 | 1.000786425  | 2.130765573  | 0.611256151  | 1.655038425  | 0.696199729  | 1.660869378  |             |             |            |
| RPL18A  | 0.229655305  |       |       | -0.101096069 |             | -0.421446238 | 0.818879282  | 0.152209885  | 1.181119717  | 1.543359718  | 1.751069436  | 1.16236549   | 1.703836978  | 2.038125961  | 1.800836829  |             |             |            |
| VIGLN   | 0.816510554  |       |       | -0.442803451 |             | 0.661403313  | -0.070230591 | 0.68178234   | 0.928532009  | -0.043736637 | 1.139786218  | -0.913228015 | 0.499265875  | 1.662696556  | 3.000644059  |             |             |            |
| NPM1    | -2.399702729 |       |       | -2.348351643 |             | 0.620580145  | 0.713887845  | 1.282837755  | 0.770502341  | -0.033284162 | 1.645648525  | 2.200841362  | 0.556422469  | 3.582915979  | 1.804702374  |             |             |            |
| LA      | -2.079831466 |       |       | 1.22725611   |             | 0.397437113  | 1.526855984  | 0.297516117  | 0.369095698  | 0.224527766  | 1.610633135  | 1.729285776  | 0.969347101  | 3.272113228  | 2.89564671   |             |             |            |
| NXF1    | -1.484657708 |       |       | 0.510883164  |             | 0            | 0            | -0.631861284 | 1.023319529  | 0            | 1.890012285  | 1.426502567  | 1.223648953  | 1.61521718   | 2.202498424  |             |             |            |
| ERAL    | -1.398104348 |       |       | -1.353982924 |             | 0            | 0            | 0.662768901  | 2.292551929  | 1.328535473  | 0.56559513   | -0.001785409 | 2.609944785  | 3.272113228  | 0.414150593  |             |             |            |
| SFRS9   | 0.445373462  |       |       | -0.522552295 |             | 0.332898072  | 0.580358803  | 0.192763291  | 2.109814733  | 0.917673955  | 1.115044326  | -0.228465587 | 2.763428142  | 2.283166472  | 0.996877159  |             |             |            |
| DUS     | -0.253100111 |       |       | -0.717671883 |             | -0.36024807  | 1.669403057  | 0.147857822  | 0.470348077  | 1.288463793  | 1.052614685  | 0.153704412  | 2.453020308  | 2.688916489  | -0.274736107 |             |             |            |
| KFC1    | -0.940917489 |       |       | -0.382178619 |             | 0.332898072  | 1.932321092  | 0.550989543  | -0.429280664 | 3.239771972  | 2.026664922  | 1.344618598  | 2.223696636  | 3.487604409  | 2.963152262  |             |             |            |
| MYEF2   | 0            |       |       | -0.378363449 |             | 1.165840938  | 0            | -0.401917258 | 2.793458182  | 0            | 0.480822137  | 3.241540236  | 0            | 1.279396553  | 2.266640518  |             |             |            |
| RN5A    | 0            |       |       | 0            |             | -1.238409013 | 0            | 0            | 1.663137908  | 1.198668763  | 1.115168669  | 1.913158183  | 2.037040176  | 0            | 2.334251382  |             |             |            |
| ROA3    | -0.510697234 |       |       | 0.027097875  |             | -0.919863858 | 0.581040287  | -0.969434615 | 0.871633209  | 0.207340831  | 4.08946304   | 1.228660834  | 0.270462289  | 1.052557686  | 1.864522142  |             |             |            |
| NCBP2   | -0.280686007 |       |       | -2.859173446 |             | 0.620580664  | 2.779620193  | 0.656347662  | 1.223864789  | 1.293861039  | 1.755798922  | 1.639237122  | 1.856682292  | 2.571313678  | 0.568300573  |             |             |            |
| E2AK2   | -2.091251528 |       |       | -1.942884147 |             | 0            | 0            | 1.904093613  | 0            | 0            | 0.121392082  | 0.710118488  | 2.453020308  | -0.03338292  | 0            |             |             |            |
| RBP56   | -3.299677629 |       |       | -2.452598655 |             | 1.571308124  | 0.426205773  | 0.601735597  | 2.470985194  | 0.224527766  | 0.79456709   | 0.461976941  | 2.740704531  | 0.624044895  | 1.330437995  |             |             |            |
| RBM25   | -2.046915767 |       |       | -1.637850427 |             | 0.620580664  | -2.199261391 | -1.19002846  | 1.793962042  | 0.224527766  | 2.606098683  | 1.225910973  | -0.765330755 | 1.360743193  | 1.220046741  |             |             |            |
| RS9     | -0.978570347 |       |       | -0.010407312 |             | -0.101553849 | 1.427726151  | 0.657843602  | 0.719080214  | 0.538160625  | 1.717577061  | 1.206119189  | 4.686611915  | 2.533499536  | 2.760199549  |             |             |            |
| SFR11   | -2.290409268 |       |       | 0.579872614  |             | -1.238409013 | 0            | -0.016281851 | 0.082539727  | 0.094661056  | 2.551482157  | 1.831966875  | 0            | 1.88581735   | -0.615755907 |             |             |            |
| CPEB4   | 0.445380181  |       |       | -0.541219874 |             | 0            | 1.526855984  | 1.16860466   | 1.502147791  | 0            | 0.818102782  | 2.235635133  | 1.818230986  | 0.218580452  | -0.043879256 |             |             |            |
| SRP72   | -2.399702729 |       |       | -3.299891597 |             | 0            | 0            | 0.88590915   | 0.696175356  | 0            | 0.305944372  | -1.100398556 | 1.818230986  | 2.802111116  | 2.490184365  |             |             |            |
| HNRPA0  | 0.631662915  |       |       | -0.439720971 |             | -0.391021027 | 0.395226978  | 0.229907324  | 0.362643259  | 3.377703892  | 1.451524238  | 0.946151387  | 0.766823913  | 3.516390399  | 2.571402953  |             |             |            |
| TRA2A   | 0.486572711  |       |       | 1.068218038  |             | -0.632180648 | -0.672403559 | 0.797084599  | 0.182139277  | 0.629991883  | 0.378387698  | 3.153957498  | 0.160496475  | 0.911729869  | 2.417066389  |             |             |            |
| RU17    | -1.71410687  |       |       | -0.690590541 |             | -0.36024807  | 0.37741751   | -0.706990994 | 0.025682531  | 0.224527766  | 2.057711732  | 0.494530275  | 1.319226855  | 1.089247379  | 0.510960395  |             |             |            |
| TNR6A   | 0            |       |       | -0.787648461 |             | 0.620580664  | 0            | -0.0479136   | 1.439314625  | -0.598484467 | 0.749016625  | 1.614529269  | 1.847140564  | 1.972543734  | 1.175688447  |             |             |            |
| STRBP   | -2.005726377 |       |       | -1.254863618 |             | 1.165840938  | 1.932321092  | 2.298427462  | 2.452082104  | 0            | 1.87495106   | 1.330255614  | 1.847140564  | 1.279396553  | 1.940218267  |             |             |            |
| HNRPQ   | -0.263223675 |       |       | 1.664950194  |             | -0.22671606  | 0.020740665  | -0.999519356 | -0.199503321 | 1.288463793  | 2.493957236  | 2.222739616  | 1.916796134  | 1.612706565  | 2.43653015   |             |             |            |
| ILF3    | -2.276729705 |       |       | -1.151163936 |             | 1.026045253  | -1.684007831 | -0.474793755 | 0.403807322  | 0.224527766  | 0.672602162  | 1.973899539  | 0.924881842  | 1.303283679  | 2.618651578  |             |             |            |
| SFRS5   | -1.955777055 |       |       | 1.072350745  |             | 0.957051788  | 2.10018112   | 0.429011744  | 0.701716147  | 2.937970737  | 1.250399398  | 0.799915034  | 4.192056401  | 0.572753117  | 1.330442584  |             |             |            |
| MS1H    | 0            |       |       | -2.636031327 |             | 0            | 0            | 0            | -0.597318496 | 0            | 2.100590948  | 2.3906326    | 0            | 2.459358046  | 3.41620093   |             |             |            |
| RBM22   | -2.005726377 |       |       | -0.130627647 |             | 0            | 1.396729723  | -1.206564581 | -0.142178206 | 0            | 1.38754728   | 0.773772048  | 0.150954733  | 2.053890373  | 0.798640368  |             |             |            |
| SNRPA   | -2.963209082 |       |       | -0.382182722 |             | 0            | 2.089875666  | 1.123844033  | 1.118818584  | 2.427145113  | 0.593624145  | 0.760276421  | 2.322260261  | 0.889511325  | 0.418413417  |             |             |            |
| IREB1   | 0            |       |       | -0.788757513 |             | 4.02804271   | 0.937031397  | -1.146100119 | 0.944741776  | -2.490300411 | 1.141150629  | 0.958574027  | 2.833083924  | 1.758374839  | 2.643013778  |             |             |            |
| SYWC    | -1.217198733 |       |       | 0.857651824  |             | 0.995273586  | 0.001839129  | 1.089628952  | 0.977839741  | 2.706271286  | 0.787828816  | -0.368061994 | 2.08382951   | 2.308955373  | 3.24638943   |             |             |            |
| RAE1L   | -2.650865905 |       |       | -0.928018061 |             | 0            | 0            | -0.74063854  | -0.038298949 | 0            | 2.449054922  | 1.049768068  | 1.223648953  | 2.802111116  | 2.198239618  |             |             |            |

Supplementary file 12

| GENES     | White        | Blood        | Cells        | Vascular     | endothelium  | Thyroid      | Lung         | Prostate     | Breast       | Liver        | Brain        | cortex      | Brain       | astrocyte   | Stomach | Colon | Brain | cerebellum |
|-----------|--------------|--------------|--------------|--------------|--------------|--------------|--------------|--------------|--------------|--------------|--------------|-------------|-------------|-------------|---------|-------|-------|------------|
| ROA2      | -1.257182245 | 0            | 0            | 0.149703954  | -0.47803011  | -0.444621541 | 0.439217336  | -0.072681474 | 0.189853283  | 0.913443035  | 1.405237403  | 0.263435099 | 1.051307459 | 1.852579056 |         |       |       |            |
| NCBP1     | 0            | 0            | 0            | 0            | 0            | 0            | 0            | 1.347207839  | 0            | 0            | 0            | 0           | 0           | 1.196434462 |         |       |       |            |
| RM12      | -2.7555125   | -0.277934411 | 1.165840938  | 1.273504875  | 0.299675114  | 1.228025435  | 1.288463793  | 1.457116824  | -0.289466194 | 3.690033788  | 2.010343391  | 2.205911321 | 2.205911321 |             |         |       |       |            |
| DHX30     | -2.31439508  | 0.004617676  | -1.276538801 | 0.478404405  | 1.3172738    | 1.272863816  | 0.224529423  | 0.487084258  | 0.724342037  | 1.136903337  | 3.627607592  | 0.146424329 | 0.146424329 |             |         |       |       |            |
| TADBP     | -2.431453452 | -0.483721338 | -0.478030856 | 0.924757672  | 0.369812928  | 0.629667341  | 2.021682653  | 0.712527074  | -0.389019677 | 0.239077006  | 3.241782649  | 1.119411172 | 1.119411172 |             |         |       |       |            |
| HNRL1     | -0.206579264 | -0.565615394 | 0.438258796  | -1.911578948 | 0.271397258  | 2.038424735  | 1.293861039  | 1.350333813  | 2.098388032  | -0.472529246 | 2.578966048  | 3.126506118 | 3.126506118 |             |         |       |       |            |
| QKI       | -1.292286173 | 1.632725032  | 0.215115556  | -1.851059124 | 2.223296184  | 0.190281704  | -1.79715323  | 0.927516768  | 3.196939475  | 2.367511039  | 0            | 0.835423891 | 0.835423891 |             |         |       |       |            |
| KHDRBS2   | 0            | 0            | 0            | 0            | 0            | 0            | 0            | 1.210946432  | -1.291631648 | 0            | 0            | 0           | 2.931924152 |             |         |       |       |            |
| TARB1     | -2.046915767 | -1.637850427 | 1.165840938  | 2.443146716  | 1.007200164  | 2.075706795  | 0            | -0.133004349 | 3.066945345  | 2.252605672  | 2.283632624  | 1.008272256 | 1.008272256 |             |         |       |       |            |
| DICER     | -0.673585703 | 0.815551218  | -0.478033183 | 0.243885325  | 1.199814169  | 1.35739711   | 1.328535473  | 1.229443018  | 2.748494524  | 0.042718279  | 1.88581735   | 3.644966751 | 3.644966751 |             |         |       |       |            |
| HNRPG     | -1.616030422 | -1.20214624  | -0.273238439 | 0.284940122  | 0.082449522  | 1.64376847   | 2.404165573  | 1.199316402  | 0.270432407  | 3.038421484  | 2.227833053  | 2.575218003 | 2.575218003 |             |         |       |       |            |
| ABC3G     | -3.615165635 | 0            | 0            | 2.089875666  | 0            | 1.831098765  | 0            | 2.088492954  | 1.306447259  | 0            | 1.185019316  | 1.196434462 | 1.196434462 |             |         |       |       |            |
| HTF9C     | -2.069667683 | -0.928019352 | 1.165840938  | 3.298069926  | 0.709649336  | 0.217945391  | 2.404165573  | 0.433861193  | 1.32057812   | 1.134182228  | 0.974722731  | 2.908002093 | 2.908002093 |             |         |       |       |            |
| RS4Y1     | -4.713773438 | -3.91893109  | 0            | -3.452023567 | 0.132138577  | -1.251379154 | -2.202618891 | 2.169084925  | 4.302180887  | 2.057622471  | 1.071831228  | 4.357569994 | 4.357569994 |             |         |       |       |            |
| R51A1     | 0            | -1.942884147 | 0            | 0            | 1.861753395  | 1.210946432  | 1.328535473  | 1.960521454  | 2.414037018  | 2.662850583  | 1.972543734  | 2.310989675 | 2.310989675 |             |         |       |       |            |
| IF4H      | -0.665092451 | 0.334251172  | -0.126633383 | -0.141777754 | 0.496983397  | 0.658908418  | 1.106145722  | 1.168209538  | 0.173008466  | 0.351374613  | 1.540333412  | 0.8086918   | 0.8086918   |             |         |       |       |            |
| CUGBP2    | -2.756656221 | -1.211886855 | 0            | -1.911578948 | -0.016281851 | 1.709835131  | 1.293861039  | -0.148965324 | 1.202104875  | 0            | 2.014043985  | 0.649267925 | 0.649267925 |             |         |       |       |            |
| RBM5      | -1.857210804 | -1.229475664 | 2.418606578  | 0.868041245  | 0.419409453  | 1.406860836  | 1.293861039  | 2.029951291  | 1.73235897   | 0.374096707  | -0.201454703 | 0.231231578 | 0.231231578 |             |         |       |       |            |
| KRR1      | -1.312580542 | -2.348351643 | -1.931556194 | 1.932321092  | -0.419308944 | -0.018466186 | 0            | 3.01867995   | 1.716038659  | 2.479574124  | 2.747040118  | 0.168212751 | 0.168212751 |             |         |       |       |            |
| CDKN2AIP  | -0.247770308 | 0.557394315  | -1.238490913 | -1.506115319 | -0.04749136  | -0.596993807 | 0            | 1.285120045  | 1.847140564  | 1.847140564  | 1.775212952  | 1.775212952 | 1.775212952 |             |         |       |       |            |
| RBM28     | 1.105998278  | -2.047128813 | 0            | 0            | -0.550132401 | 0.652714458  | 1.328535473  | 2.736741313  | 1.384715616  | 1.354408879  | 0.578417621  | 1.889581643 | 1.889581643 |             |         |       |       |            |
| HNRL      | -0.238802939 | -0.094496977 | -0.861023135 | 0.020741552  | 1.073774281  | 1.09444719   | 1.328535473  | 1.204664863  | 0.617026754  | 0.126928421  | 2.861617854  | 2.011572073 | 2.011572073 |             |         |       |       |            |
| DSRAD     | -2.565808768 | -0.983049911 | -0.765715255 | 3.030935311  | -0.091407984 | 2.041144823  | -0.908757852 | 0.26335938   | 0.8011546    | 0.844105581  | 1.964713373  | 1.512762881 | 1.512762881 |             |         |       |       |            |
| U2AF1L4   | -1.592876625 | -0.234872172 | 1.431510014  | 1.526855984  | -1.909243201 | 2.582781719  | 0.189853332  | -0.137547895 | 0.440197446  | 1.916796134  | 0            | 0.156126938 | 0.156126938 |             |         |       |       |            |
| HNRL      | -3.297623494 | -0.223867428 | 0.461517457  | 0.451525969  | -0.204417269 | 0.202823245  | 0.62517263   | 0.703672023  | 0.27069618   | 0.056310976  | 1.640124704  | 1.11853434  | 1.11853434  |             |         |       |       |            |
| ACF       | -0.697571178 | -1.249738399 | 0            | -1.911578948 | -2.121694911 | 1.831098765  | 1.328535473  | 0.999091553  | 1.355319557  | -1.696180587 | 1.279396553  | 1.792775619 | 1.792775619 |             |         |       |       |            |
| SYMC      | -1.293704451 | -1.046915513 | 0            | 2.779620193  | 0.0612869    | 0.039177486  | 1.328535473  | 1.029677629  | -0.289466194 | 2.047554769  | 2.429950533  | 1.111559338 | 1.111559338 |             |         |       |       |            |
| EXOS7     | -1.803569456 | -1.637850427 | 0.022741538  | -2.758876386 | -1.481496701 | 1.614272725  | 3.08561868   | 0.961064966  | 2.819502126  | 2.252605672  | 2.020682288  | 3.476140957 | 3.476140957 |             |         |       |       |            |
| ABEC1     | 0            | 0            | 0            | 0            | 0            | 1.196482824  | 1.198668763  | 0            | 0            | 1.746561595  | 0            | 1.173555864 | 1.173555864 |             |         |       |       |            |
| RBMS2     | 0            | 0            | 0            | 0            | 0            | 0            | 1.25440733   | 1.198668763  | 0            | 0            | 0            | 0           | 0           |             |         |       |       |            |
| DAZP1     | -1.00601907  | -1.333487903 | -1.238490913 | 2.443146716  | 0.399877494  | 1.148137153  | 1.98700822   | 1.900968918  | -0.663347971 | 2.511378167  | 1.400336269  | 2.202498424 | 2.202498424 |             |         |       |       |            |
| RBM19     | 0            | 0            | 0            | 1.396729723  | 1.16860466   | 1.347207839  | 0            | 1.788146283  | -1.357104966 | 0            | 1.19267017   | 0           | 0           |             |         |       |       |            |
| TDRKH     | 0            | 0            | 0            | 0            | 0            | 0            | 0            | 0            | -1.163934877 | 0            | 0            | 0           | 0           |             |         |       |       |            |
| RENT1     | -0.280686007 | -1.948009373 | 0            | 1.526855984  | 0            | 1.020004213  | 0            | 1.937837654  | 0            | 1.223648953  | 2.022292981  | 0           | 0           |             |         |       |       |            |
| STAU1     | -0.98525325  | -0.741879338 | 0.332894545  | -0.490080523 | -0.427884173 | 0.501418105  | -0.320970804 | 0.742463158  | 3.446514856  | 0.402274409  | 0.714839063  | 1.111469409 | 1.111469409 |             |         |       |       |            |
| PTBP1     | -1.113643768 | -0.210109454 | 1.165840938  | 2.913149259  | 0.486012816  | 1.183338256  | 1.98700822   | 2.011146089  | 0.946894127  | 2.54982791   | 1.350355445  | 1.517019472 | 1.517019472 |             |         |       |       |            |
| DKFZp686l | -0.401038746 | -2.924945473 | -0.295708909 | 3.298069926  | 1.943152313  | 0.575283093  | 0.094661056  | 2.393608826  | 2.380748189  | 0.249381284  | -1.744442998 | 0.743478416 | 0.743478416 |             |         |       |       |            |
| SFRS3     | -0.573500262 | -0.006424735 | -0.111785849 | -0.895549343 | -0.053533541 | 0.406649698  | 0.326477289  | 0.858395512  | 0.865586348  | 0.393476409  | 2.227188913  | 2.477201724 | 2.477201724 |             |         |       |       |            |
| DUS11     | -1.369221953 | 0.410086577  | 0            | -1.911578948 | -1.718737061 | 0.198561596  | 1.328535473  | 2.263797486  | 2.354902363  | 1.746561595  | 1.185019316  | 2.248649363 | 2.248649363 |             |         |       |       |            |
| CSTFT     | -2.07042224  | -0.928018061 | 0.438258796  | 1.007200164  | 2.930942521  | -1.60190448  | 1.084149313  | 1.538561639  | 0.756839721  | -0.03338292  | 1.102240134  | 1.102240134 | 1.102240134 |             |         |       |       |            |
| MCES      | -2.046915767 | 0            | 1.165840938  | 0            | -0.016281851 | 0.860455153  | 0.860455153  | 2.427145113  | 2.633075187  | 0.532763793  | 2.740704531  | 1.66020505  | 1.66020505  |             |         |       |       |            |
| MGC27016  | 0.267509428  | -0.318068305 | -0.583391621 | -2.422401615 | -0.091411583 | 0.501292926  | 0            | 0.231410896  | 2.389789785  | 1.125085429  | 1.19267017   | 1.565561289 | 1.565561289 |             |         |       |       |            |
| SFRS4     | -0.653234669 | 0.458274667  | 1.571308124  | 2.913149259  | -1.114897104 | 0.590617257  | -1.104007707 | 0.90692633   | 1.066847841  | 0.853649927  | 1.13486919   | 2.376569486 | 2.376569486 |             |         |       |       |            |
| LARP5     | 0            | 1.119110752  | 0            | 0            | 0            | 1.221130162  | 0            | 1.858331858  | 0            | 1.847140564  | 1.360743193  | 1.334745771 | 1.334745771 |             |         |       |       |            |
| SAM68     | -1.091613458 | 1.266479734  | -0.215665562 | -1.077870145 | -0.186723656 | 0.66441452   | 0.978313011  | 0.582766109  | 1.280173736  | 0.122049671  | 0.771726591  | 0.701294123 | 0.701294123 |             |         |       |       |            |
| RT15      | -1.17951021  | -0.234872172 | -0.072568075 | 0.583760348  | 0.907661919  | 2.747386292  | -2.490300411 | 1.441064982  | -0.220081586 | 2.662850583  | 3.582915979  | 1.940218267 | 1.940218267 |             |         |       |       |            |
| FUBP1     | -0.686151127 | -1.112684856 | 0            | 2.124028839  | 0.105866739  | 0.743827512  | 1.293861039  | 1.471748911  | 0.802306396  | 2.845173302  | 3.582916257  | 2.034968208 | 2.034968208 |             |         |       |       |            |
| IGF2BP1   | 0            | 0            | 0            | 0            | 0            | 1.248238463  | 0            | 1.255581849  | 0            | 1.88581735   | 0            | 1.099628439 | 1.099628439 |             |         |       |       |            |
| M10L1     | 0            | -2.348351643 | 0            | 0            | 0            | 0            | 0            | 0            | 0            | 0            | 0            | 0           | 0           |             |         |       |       |            |
| DRBP1     | -1.398104348 | 0            | 1.165840938  | 0            | -2.121694911 | 2.35302152   | -1.279547052 | 2.036592755  | -0.031763561 | 0            | 0            | 1.940218267 | 1.940218267 |             |         |       |       |            |
| IREB2     | 0            | 0            | 0            | 0            | 0            | 0            | 0            | 1.165186237  | 0            | 1.125085429  | 0            | 1.196434462 | 1.196434462 |             |         |       |       |            |
| GRSF1     | -2.067266475 | 0.02328712   | -1.238490913 | 1.526855984  | 0.83616196   | 0.596339757  | 1.293861039  | 0.294853338  | 1.033527634  | 2.252605672  | 1.400334174  | 0.418413417 | 0.418413417 |             |         |       |       |            |
| CUGB1     | -1.37411803  | 1.119110752  | 0            | 0            | 0            | 1.124682813  | 0            | 1.948729029  | 2.048466737  | 0            | -0.03338292  | 1.099628439 | 1.099628439 |             |         |       |       |            |
| SCAND1    | -0.150334612 | -0.855287481 | 0.232815559  | 0.98922569   | 0.803268539  | 2.130755017  | 0.412998541  | 0.918023117  | 1.280075604  | 0.812520594  | 0.360853529  | 2.306214618 | 2.306214618 |             |         |       |       |            |
| FXR1      | -1.353768587 | 0.569359628  | -0.22671606  | -1.506115319 | 0.27383986   | 0.584649645  | 1.799291244  | 0.89255358   | 1.544355089  | 2.322260261  | 2.528995303  | 3.615187165 | 3.615187165 |             |         |       |       |            |
| RBPMS     | 1.10598278   | 0.652703604  | -0.765717042 | -2.758876386 | -1.19002846  | 0.091573129  | -0.908757852 | 2.449054922  | -2.050252146 | 2.511378167  | 1.88581735   | 2.295046751 | 2.295046751 |             |         |       |       |            |
| COVA1     | -1.369221953 | 1.119110752  | 0            | 0            | -1.21609602  | 1.210946432  | 1.198668763  | 1.726157271  | 1.740127521  | 0            | 1.19267017   | 1.970036748 | 1.970036748 |             |         |       |       |            |

Supplementary file 12

| GENES   | White Blood Cells | Vascular endothelium | Thyroid      | Lung         | Prostate     | Breast       | Liver        | Brain cortex | Brain astrocyte | Stomach      | Colon        | Brain cerebellum |
|---------|-------------------|----------------------|--------------|--------------|--------------|--------------|--------------|--------------|-----------------|--------------|--------------|------------------|
| NUCL    | -1.175158395      | 0.042683921          | 0.146122684  | -0.975101663 | -0.003238422 | -0.065824646 | 1.214358403  | 1.345172755  | 0.563667737     | 0.447224721  | 3.469019185  | 1.734390898      |
| TRSPAP1 | -0.195089147      | -0.928018061         | 1.571308124  | 1.932321092  | 0.101605835  | 0.985183651  | 0.917674946  | 1.228157349  | 2.008573699     | 0.150959977  | 2.571313678  | 1.220041763      |
| RBM38   | -1.857206566      | -0.13575144          | 0            | 0.426205773  | -1.114897104 | 1.076934477  | 0.224527766  | 1.748191464  | 0.237022154     | 2.734523341  | -0.470442774 | -0.38835008      |
| SURF6   | -2.046915767      | 0                    | -1.238409013 | 0            | -1.21609602  | 0.249383867  | 0.189853332  | 1.343446879  | 0.005091356     | 0            | 1.972543734  | 1.212375403      |
| ELAV4   | 0                 | 0                    | 0            | 0            | 0            | 1.137951585  | 0            | -0.780603887 | 1.643149246     | 0            | 0            | 3.291817689      |
| RED2    | 0                 | 0                    | 0            | 0            | 0            | -1.251379154 | 0            | 0            | 0               | 0            | 0            | 0                |
| PM14    | -2.63945011       | -0.971083025         | 0.12810463   | 0.583760219  | -0.030379303 | 0.367983135  | 1.477293527  | 2.024779698  | 0.517939395     | 0.246269297  | 1.677028982  | 1.486196537      |
| RBM6    | -2.690000893      | -0.712895012         | 0.032795017  | 0.020740726  | 0.601737221  | 0.606981523  | 0.224526222  | 0.337000204  | 3.559422606     | 1.096083304  | 2.018171008  | 1.160095228      |
| PPRC1   | -0.263223675      | 0                    | 0            | 0            | 0.754433077  | 2.508826606  | 0            | 1.722824809  | 1.355319557     | 1.847140564  | 3.557967485  | 0.823873397      |
| PRGC2   | -1.353768587      | 0                    | 0            | 0            | 0            | 1.210946432  | 0            | 1.27314526   | 1.355319557     | 0            | 1.19267017   | -0.967885918     |
| NUFP1   | -1.803569456      | -1.249738399         | -1.238409013 | 0            | 0.085066319  | 0.120993751  | 1.198668763  | 1.99865439   | -1.357104966    | 1.223648953  | 1.612706565  | 1.905522584      |
| HNRPK   | -1.763706946      | -1.051705672         | -0.206098245 | -0.598294914 | 0.184389174  | -0.253157762 | -0.097828911 | 2.178534493  | 1.280578318     | 0.220615547  | 2.298027124  | 1.831097364      |
| DHX9    | -3.24700059       | -1.435026519         | -0.22671606  | -0.266940299 | -0.395633265 | -0.401111426 | 0.883000513  | 2.247526413  | 1.416096069     | 0.22061335   | 1.12133399   | 3.270287312      |
| NOL3    | -1.72978477       | -2.047130104         | 1.858989677  | 0.937032506  | 0.309936716  | 3.33014167   | 0.094661056  | 1.256844117  | 3.151924154     | 2.486342285  | 3.293994429  | 1.633431282      |
| RL12    | -1.029889223      | 0.423180785          | -0.068896819 | -0.028049711 | 0.085064424  | 0.986229388  | 2.657952915  | 2.13907224   | 1.808659904     | 0.33728876   | 2.907141829  | 2.404354277      |
| DDX17   | 0.486566571       | -0.82889862          | -1.238409013 | 2.913149259  | 1.278348334  | 1.335109002  | 0            | 0.599552139  | -0.542644113    | 3.204525348  | 2.053890373  | 1.216831152      |
| SYG     | 0.088700291       | -1.804602648         | 1.026045253  | 1.416674282  | -0.056933922 | 0.828609874  | 2.714827185  | 1.520198244  | -1.54237649     | -0.159451011 | 3.217473361  | 0.875586995      |
| ZNF638  | -2.472732849      | -1.435026519         | 0.332898072  | -2.758876386 | 0.585199503  | 1.324455847  | 0.735351846  | 0.82397791   | 2.365487272     | -0.254505131 | 1.360743193  | 2.667343036      |

©2009 Landes Bioscience.  
Do not distribute.

Supplementary file 13

| Name   | # of Studies | Study Details                                                                                                                                                          |
|--------|--------------|------------------------------------------------------------------------------------------------------------------------------------------------------------------------|
| TNRC6C | 1            |                                                                                                                                                                        |
|        |              | Study: Richardson_Breast_2 Experiment Type: mRNA Analysis: Breast Type Class 1: Normal Breast (7) Class 2: Breast Carcinoma (40) Ttest: 4.672 Pvalue: 5.9E5            |
| RPS4Y1 | 2            |                                                                                                                                                                        |
|        |              | Study: Finak_Breast Experiment Type: mRNA Analysis: Breast Stroma Type Class 1: Normal Breast (6) Class 2: Breast Carcinoma (53) Ttest: 14.179 Pvalue: 1.1E6           |
|        |              | Study: Karnoub_Breast Experiment Type: mRNA Analysis: Breast Type Class 1: Normal Breast (15) Class 2: Invasive Ductal Breast Carcinoma (7) Ttest: 3.045 Pvalue: 0.007 |

| Name   | # of Studies | Study Details                                                                                                                                                          |
|--------|--------------|------------------------------------------------------------------------------------------------------------------------------------------------------------------------|
| DRB1   | 1            |                                                                                                                                                                        |
|        |              | Study: Karnoub_Breast Experiment Type: mRNA Analysis: Breast Type Class 1: Normal Breast (15) Class 2: Invasive Ductal Breast Carcinoma (7) Ttest: 7.112 Pvalue: 3.3E6 |
| ASCC1  | 1            |                                                                                                                                                                        |
|        |              | Study: Richardson_Breast_2 Experiment Type: mRNA Analysis: Breast Type Class 1: Normal Breast (7) Class 2: Breast Carcinoma (40) Ttest: 5.029 Pvalue: 4.8E4            |
| ZNF638 | 1            |                                                                                                                                                                        |
|        |              | Study: Richardson_Breast_2 Experiment Type: mRNA Analysis: Breast Type Class 1: Normal Breast (7) Class 2: Breast Carcinoma (40) Ttest: 5.642 Pvalue: 1.1E             |
| RNASEL | 2            |                                                                                                                                                                        |
|        |              | Study: Finak_Breast Experiment Type: mRNA Analysis: Breast Stroma Type Class 1: Normal Breast (6) Class 2: Breast Carcinoma (53) Ttest: 10.924 Pvalue: 1.4E6           |
|        |              | Study: Richardson_Breast_2 Experiment Type: mRNA Analysis: Breast Type Class 1: Normal Breast (7) Class 2: Breast Carcinoma (40) Ttest: 3.643 Pvalue: 0.00             |
| COVA1  | 1            |                                                                                                                                                                        |

|         |   |                                                                                                                                                             |
|---------|---|-------------------------------------------------------------------------------------------------------------------------------------------------------------|
|         |   | Study: Richardson_Breast_2 Experiment Type: mRNA Analysis: Breast Type Class 1: Normal Breast (7) Class 2: Breast Carcinoma (40) Ttest: 5.197 Pvalue: 6.3E5 |
| CUGBP1  | 1 |                                                                                                                                                             |
|         |   | Study: Finak_Breast Experiment Type: mRNA Analysis: Breast Stroma Type Class 1: Normal Breast (6) Class 2: Breast Carcinoma (53) Ttest: 5.121 Pvalue: 0.002 |
| HTATSF1 | 1 |                                                                                                                                                             |
|         |   | Study: Richardson_Breast_2 Experiment Type: mRNA Analysis: Breast Type Class 1: Normal Breast (7) Class 2: Breast Carcinoma (40) Ttest: 5.686 Pvalue: 7E6   |
| RBM27   | 2 |                                                                                                                                                             |
|         |   | Study: Finak_Breast Experiment Type: mRNA Analysis: Breast Stroma Type Class 1: Normal Breast (6) Class 2: Breast Carcinoma (53) Ttest: 6.856 Pvalue: 6.7E4 |
|         |   | Study: Richardson_Breast_2 Experiment Type: mRNA Analysis: Breast Type Class 1: Normal Breast (7) Class 2: Breast Carcinoma (40) Ttest: 3.612 Pvalue: 0.004 |
| FMR1    | 1 |                                                                                                                                                             |
|         |   | Study: Richardson_Breast_2 Experiment Type: mRNA Analysis: Breast Type Class 1: Normal Breast (7) Class 2: Breast Carcinoma (40) Ttest: 4.948 Pvalue: 1.4E5 |
| ELAVL4  | 1 |                                                                                                                                                             |

|       |   |                                                                                                                                                             |
|-------|---|-------------------------------------------------------------------------------------------------------------------------------------------------------------|
|       |   | Study: Richardson_Breast_2 Experiment Type: mRNA Analysis: Breast Type Class 1: Normal Breast (7) Class 2: Breast Carcinoma (40) Ttest: 4.722 Pvalue: 2.4E5 |
| MYEF2 | 1 |                                                                                                                                                             |
|       |   | Study: Richardson_Breast_2 Experiment Type: mRNA Analysis: Breast Type Class 1: Normal Breast (7) Class 2: Breast Carcinoma (40) Ttest: 3.437 Pvalue: 0.002 |

|              |   |                                                                                                                                                             |
|--------------|---|-------------------------------------------------------------------------------------------------------------------------------------------------------------|
| NCBP1        | 1 |                                                                                                                                                             |
|              |   | Study: Richardson_Breast_2 Experiment Type: mRNA Analysis: Breast Type Class 1: Normal Breast (7) Class 2: Breast Carcinoma (40) Ttest: 6.689 Pvalue: 2.6E6 |
| SLC4A1A<br>P | 1 |                                                                                                                                                             |
|              |   | Study: Richardson_Breast_2 Experiment Type: mRNA Analysis: Breast Type Class 1: Normal Breast (7) Class 2: Breast Carcinoma (40) Ttest: 5.296 Pvalue: 1.1E  |
| ZCRB1        | 1 |                                                                                                                                                             |
|              |   | Study: Richardson_Breast_2 Experiment Type: mRNA Analysis: Breast Type Class 1: Normal Breast (7) Class 2: Breast Carcinoma (40) Ttest: 6.609 Pvalue: 3.1E  |
| RBM35B       | 1 |                                                                                                                                                             |
|              |   | Study: Richardson_Breast_2 Experiment Type: mRNA Analysis: Breast Type Class 1: Normal Breast (7) Class 2: Breast Carcinoma (40) Ttest: 7.038 Pvalue: 2.7E8 |
| DSRAD        | 2 |                                                                                                                                                             |

|             |   |                                                                                                                                                                        |
|-------------|---|------------------------------------------------------------------------------------------------------------------------------------------------------------------------|
|             |   | Study: Richardson_Breast_2 Experiment Type: mRNA Analysis: Breast Type Class 1: Normal Breast (7) Class 2: Breast Carcinoma (40) Ttest: 4.496 Pvalue: 7.8E4            |
|             |   | Study: Karnoub_Breast Experiment Type: mRNA Analysis: Breast Type Class 1: Normal Breast (15) Class 2: Invasive Ductal Breast Carcinoma (7) Ttest: 3.954 Pvalue: 0.001 |
| JOSD2       | 1 |                                                                                                                                                                        |
|             |   | Study: Richardson_Breast_2 Experiment Type: mRNA Analysis: Breast Type Class 1: Normal Breast (7) Class 2: Breast Carcinoma (40) Ttest: 3.698 Pvalue: 0.001            |
| DDX53       | 1 |                                                                                                                                                                        |
|             |   | Study: Richardson_Breast_2 Experiment Type: mRNA Analysis: Breast Type Class 1: Normal Breast (7) Class 2: Breast Carcinoma (40) Ttest: 3.255 Pvalue: 0.009            |
| TIA1        | 1 |                                                                                                                                                                        |
|             |   | Study: Richardson_Breast_2 Experiment Type: mRNA Analysis: Breast Type Class 1: Normal Breast (7) Class 2: Breast Carcinoma (40) Ttest: 6.903 Pvalue: 1.2E7            |
| POLDIP3     | 1 |                                                                                                                                                                        |
|             |   | Study: Richardson_Breast_2 Experiment Type: mRNA Analysis: Breast Type Class 1: Normal Breast (7) Class 2: Breast Carcinoma (40) Ttest: 3.252 Pvalue: 0.005            |
| APOBEC<br>1 | 1 |                                                                                                                                                                        |

|              |   |                                                                                                                                                                                         |
|--------------|---|-----------------------------------------------------------------------------------------------------------------------------------------------------------------------------------------|
|              |   | Study: Karnoub_Breast Experiment Type: mRNA Analysis: Breast Type Class 1: Normal Breast (15) Class 2: Invasive Ductal Breast Carcinoma (7) Ttest: 3.284 Pvalue: 0.004                  |
| ELAVL3       | 1 |                                                                                                                                                                                         |
|              |   | Study: Finak_Breast Experiment Type: mRNA Analysis: Breast Stroma Type Class 1: Normal Breast (6) Class 2: Breast Carcinoma (53) Ttest: 4.311 Pvalue: 0.007                             |
| IGF2BP1      | 1 |                                                                                                                                                                                         |
|              |   | Study: Turashvili_Breast Experiment Type: mRNA Analysis: Breast Ductal Tissue Type Class 1: Adjacent Normal Ductal (5) Class 2: Invasive Ductal Carcinoma (5) Ttest: 3.604 Pvalue: 0.01 |
| NCBP2        | 1 |                                                                                                                                                                                         |
|              |   | Study: Richardson_Breast_2 Experiment Type: mRNA Analysis: Breast Type Class 1: Normal Breast (7) Class 2: Breast Carcinoma (40) Ttest: 5.524 Pvalue: 1.5E5                             |
| RBM35A       | 1 |                                                                                                                                                                                         |
|              |   | Study: Richardson_Breast_2 Experiment Type: mRNA Analysis: Breast Type Class 1: Normal Breast (7) Class 2: Breast Carcinoma (40) Ttest: 6.38 Pvalue: 8.2E6                              |
| RBP56        | 1 |                                                                                                                                                                                         |
|              |   | Study: Karnoub_Breast Experiment Type: mRNA Analysis: Breast Type Class 1: Normal Breast (15) Class 2: Invasive Ductal Breast Carcinoma (7) Ttest: 2.968 Pvalue: 0.01                   |
| PPARGC<br>1B | 1 |                                                                                                                                                                                         |



|       |   |                                                                                                                                                             |
|-------|---|-------------------------------------------------------------------------------------------------------------------------------------------------------------|
|       |   | Study: Richardson_Breast_2 Experiment Type: mRNA Analysis: Breast Type Class 1: Normal Breast (7) Class 2: Breast Carcinoma (40) Ttest: 3.548 Pvalue: 0.001 |
| PNPT1 | 1 |                                                                                                                                                             |
|       |   | Study: Richardson_Breast_2 Experiment Type: mRNA Analysis: Breast Type Class 1: Normal Breast (7) Class 2: Breast Carcinoma (40) Ttest: 8.435 Pvalue: 5.2E7 |
| RTCD1 | 3 |                                                                                                                                                             |
|       |   | Study: Richardson_Breast_2 Experiment Type: mRNA Analysis: Breast Type Class 1: Normal Breast (7) Class 2: Breast Carcinoma (40) Ttest: 6.031 Pvalue: 1.2E5 |
|       |   | Study: Finak_Breast Experiment Type: mRNA Analysis: Breast Stroma Type Class 1: Normal Breast (6) Class 2: Breast Carcinoma (53) Ttest: 5.569 Pvalue: 5.2E4 |
|       |   | Study: Sorlie_Breast Experiment Type: mRNA Analysis: Breast Type Class 1: Benign Breast (7) Class 2: Breast Carcinoma (78) Ttest: 3.609 Pvalue: 0.008       |

| Name    | # of Studies | Study Details                                                                                                                                                           |
|---------|--------------|-------------------------------------------------------------------------------------------------------------------------------------------------------------------------|
| SYNCRIP | 1            |                                                                                                                                                                         |
|         |              | Study: Graudens_Colon Experiment Type: mRNA Analysis: Colon Type Class 1: Normal Colon (12) Class 2: Colorectal Carcinoma (18) Ttest: 4.18 Pvalue: 2.8E4                |
| TRBP2   | 1            |                                                                                                                                                                         |
|         |              | Study: Ki_Colon Experiment Type: mRNA Analysis: Tissue Type Class 1: Adjacent Normal Colon Mucosa (28) Class 2: Primary Colon Carcinoma (53) Ttest: 3.202 Pvalue: 0.002 |
| SR140   | 2            |                                                                                                                                                                         |
|         |              | Study: Notterman_Colon Experiment Type: mRNA Analysis: Colon Type Class 1: Normal Colon (18) Class 2: Colon Adenocarcinoma (18) Ttest: 4.802 Pvalue: 3.3E5              |
|         |              | Study: Graudens_Colon Experiment Type: mRNA Analysis: Colon Type Class 1: Normal Colon (12) Class 2: Colorectal Carcinoma (18) Ttest: 2.882 Pvalue: 0.008               |
| CPSF5   | 1            |                                                                                                                                                                         |
|         |              | Study: Ki_Colon Experiment Type: mRNA Analysis: Tissue Type Class 1: Adjacent Normal Colon Mucosa (28) Class 2: Primary Colon Carcinoma (53) Ttest: 6.738 Pvalue: 3.3E9 |
| FUBP2   | 1            |                                                                                                                                                                         |
|         |              | Study: Chen_Liver Experiment Type: mRNA Analysis: Liver Type Class 1: Nontumor Liver (76) Class 2: Hepatocellular Carcinoma (104) Ttest: 4.718 Pvalue: 4.8E6            |

|        |   |                                                                                                                                                                         |
|--------|---|-------------------------------------------------------------------------------------------------------------------------------------------------------------------------|
| HNRPDL | 1 |                                                                                                                                                                         |
|        |   | Study: Hong_Colon Experiment Type: mRNA Analysis: Colonic Mucosa Type Class 1: Normal (10) Class 2: Adjacent NonTumoral (12) Ttest: 5.691 Pvalue: 2E5                   |
| PAIP1  | 1 |                                                                                                                                                                         |
|        |   | Study: Ki_Colon Experiment Type: mRNA Analysis: Tissue Type Class 1: Adjacent Normal Colon Mucosa (28) Class 2: Primary Colon Carcinoma (53) Ttest: 6.81 Pvalue: 1.8E9  |
| PPIE   | 1 |                                                                                                                                                                         |
|        |   | Study: Ki_Colon Experiment Type: mRNA Analysis: Tissue Type Class 1: Adjacent Normal Colon Mucosa (28) Class 2: Primary Colon Carcinoma (53) Ttest: 5.685 Pvalue: 2.2E7 |
| PNPT1  | 1 |                                                                                                                                                                         |
|        |   | Study: Graudens_Colon Experiment Type: mRNA Analysis: Colon Type Class 1: Normal Colon (12) Class 2: Colorectal Carcinoma (18) Ttest: 3.627 Pvalue: 0.003               |
| HRB    | 1 |                                                                                                                                                                         |
|        |   | Study: Ki_Colon Experiment Type: mRNA Analysis: Tissue Type Class 1: Adjacent Normal Colon Mucosa (28) Class 2: Primary Colon Carcinoma (53) Ttest: 4.887 Pvalue: 5.3E6 |
| NOL8   | 2 |                                                                                                                                                                         |
|        |   | Study: Graudens_Colon Experiment Type: mRNA Analysis: Colon Type Class 1: Normal Colon (12) Class 2: Colorectal Carcinoma (18) Ttest: 5.773 Pvalue: 4.2E6               |

|       |   |                                                                                                                                                                       |
|-------|---|-----------------------------------------------------------------------------------------------------------------------------------------------------------------------|
|       |   | Study: Zou_Colon Experiment Type: mRNA Analysis: Colon Type Class 1: Normal Colonic Epithelium (8) Class 2: Invasive Colon Carcinoma (9) Ttest: 3.273 Pvalue: 0.007   |
| NCBP2 | 3 |                                                                                                                                                                       |
|       |   | Study: Ki_Colon Experiment Type: mRNA Analysis: Tissue Type Class 1: Adjacent Normal Colon Mucosa (28) Class 2: Primary Colon Carcinoma (53) Ttest: 5.431 Pvalue: 6E7 |
|       |   | Study: Alon_Colon Experiment Type: mRNA Analysis: Colon Type Class 1: Normal Colon (22) Class 2: Colon Adenocarcinoma (40) Ttest: 4.782 Pvalue: 1.9E5                 |
|       |   | Study: Notterman_Colon Experiment Type: mRNA Analysis: Colon Type Class 1: Normal Colon (18) Class 2: Colon Adenocarcinoma (18) Ttest: 3.284 Pvalue: 0.003            |
| RPL22 | 2 |                                                                                                                                                                       |
|       |   | Study: Graudens_Colon Experiment Type: mRNA Analysis: Colon Type Class 1: Normal Colon (12) Class 2: Colorectal Carcinoma (18) Ttest: 3.213 Pvalue: 0.003             |
|       |   | Study: Notterman_Colon Experiment Type: mRNA Analysis: Colon Type Class 1: Normal Colon (18) Class 2: Colon Adenocarcinoma (18) Ttest: 2.908 Pvalue: 0.00             |
| PSMA1 | 3 |                                                                                                                                                                       |

|       |   |                                                                                                                                                                          |
|-------|---|--------------------------------------------------------------------------------------------------------------------------------------------------------------------------|
|       |   | Study: Ki_Colon Experiment Type: mRNA Analysis: Tissue Type Class 1: Adjacent Normal Colon Mucosa (28) Class 2: Primary Colon Carcinoma (53) Ttest: 6.964 Pvalue: 8.8E10 |
|       |   | Study: Notterman_Colon Experiment Type: mRNA Analysis: Colon Type Class 1: Normal Colon (18) Class 2: Colon Adenocarcinoma (18) Ttest: 5.387 Pvalue: 5.7E6               |
|       |   | Study: Alon_Colon Experiment Type: mRNA Analysis: Colon Type Class 1: Normal Colon (22) Class 2: Colon Adenocarcinoma (40) Ttest: 3.159 Pvalue: 0.003                    |
| FXR1  | 2 |                                                                                                                                                                          |
|       |   | Study: Hong_Colon Experiment Type: mRNA Analysis: Colonic Mucosa Type Class 1: Normal (10) Class 2: Adjacent NonTumoral (12) Ttest: 3.376 Pvalue: 0.004                  |
|       |   | Study: Ki_Colon Experiment Type: mRNA Analysis: Tissue Type Class 1: Adjacent Normal Colon Mucosa (28) Class 2: Primary Colon Carcinoma (53) Ttest: 2.934 Pvalue: 0.004  |
| PTBP1 | 3 |                                                                                                                                                                          |
|       |   | Study: Ki_Colon Experiment Type: mRNA Analysis: Tissue Type Class 1: Adjacent Normal Colon Mucosa (28) Class 2: Primary Colon Carcinoma (53) Ttest: 6.135 Pvalue: 5E8    |

|       |   |                                                                                                                                                                         |
|-------|---|-------------------------------------------------------------------------------------------------------------------------------------------------------------------------|
|       |   | Study: Graudens_Colon Experiment Type: mRNA Analysis: Colon Type Class 1: Normal Colon (12) Class 2: Colorectal Carcinoma (18) Ttest: 3.284 Pvalue: 0.003               |
|       |   | Study: Notterman_Colon Experiment Type: mRNA Analysis: Colon Type Class 1: Normal Colon (18) Class 2: Colon Adenocarcinoma (18) Ttest: 3.12 Pvalue: 0.004               |
| CSTF3 | 3 |                                                                                                                                                                         |
|       |   | Study: Ki_Colon Experiment Type: mRNA Analysis: Tissue Type Class 1: Adjacent Normal Colon Mucosa (28) Class 2: Primary Colon Carcinoma (53) Ttest: 6.093 Pvalue: 4.2E8 |
|       |   | Study: Graudens_Colon Experiment Type: mRNA Analysis: Colon Type Class 1: Normal Colon (12) Class 2: Colorectal Carcinoma (18) Ttest: 3.149 Pvalue: 0.004               |
|       |   | Study: Notterman_Colon Experiment Type: mRNA Analysis: Colon Type Class 1: Normal Colon (18) Class 2: Colon Adenocarcinoma (18) Ttest: 2.942 Pvalue: 0.006              |
| SRP72 | 2 |                                                                                                                                                                         |
|       |   | Study: Notterman_Colon Experiment Type: mRNA Analysis: Colon Type Class 1: Normal Colon (18) Class 2: Colon Adenocarcinoma (18) Ttest: 5.124 Pvalue: 2.2E5              |

|     |   |                                                                                                                                                                         |
|-----|---|-------------------------------------------------------------------------------------------------------------------------------------------------------------------------|
|     |   | Study: Ki_Colon Experiment Type: mRNA Analysis: Tissue Type Class 1: Adjacent Normal Colon Mucosa (28) Class 2: Primary Colon Carcinoma (53) Ttest: 2.734 Pvalue: 0.008 |
| FUS | 1 |                                                                                                                                                                         |

|       |   |                                                                                                                                                                          |
|-------|---|--------------------------------------------------------------------------------------------------------------------------------------------------------------------------|
|       |   | Study: Graudens_Colon Experiment Type: mRNA Analysis: Colon Type Class 1: Normal Colon (12) Class 2: Colorectal Carcinoma (18) Ttest: 3.606 Pvalue: 0.001                |
| KRR1  | 1 |                                                                                                                                                                          |
|       |   | Study: Ki_Colon Experiment Type: mRNA Analysis: Tissue Type Class 1: Adjacent Normal Colon Mucosa (28) Class 2: Primary Colon Carcinoma (53) Ttest: 3.555 Pvalue: 6.5E4  |
| HNRPM | 3 |                                                                                                                                                                          |
|       |   | Study: Ki_Colon Experiment Type: mRNA Analysis: Tissue Type Class 1: Adjacent Normal Colon Mucosa (28) Class 2: Primary Colon Carcinoma (53) Ttest: 7.052 Pvalue: 6.9E10 |
|       |   | Study: Notterman_Colon Experiment Type: mRNA Analysis: Colon Type Class 1: Normal Colon (18) Class 2: Colon Adenocarcinoma (18) Ttest: 3.639 Pvalue: 9E4                 |
|       |   | Study: Alon_Colon Experiment Type: mRNA Analysis: Colon Type Class 1: Normal Colon (22) Class 2: Colon Adenocarcinoma (40) Ttest: 2.698 Pvalue: 0.01                     |
| DHX9  | 1 |                                                                                                                                                                          |

|       |   |                                                                                                                                                                          |
|-------|---|--------------------------------------------------------------------------------------------------------------------------------------------------------------------------|
|       |   | Study: Ki_Colon Experiment Type: mRNA Analysis: Tissue Type Class 1: Adjacent Normal Colon Mucosa (28) Class 2: Primary Colon Carcinoma (53) Ttest: 4.193 Pvalue: 7.3E5  |
| PABP4 | 3 |                                                                                                                                                                          |
|       |   | Study: Graudens_Colon Experiment Type: mRNA Analysis: Colon Type Class 1: Normal Colon (12) Class 2: Colorectal Carcinoma (18) Ttest: 4.028 Pvalue: 5E4                  |
|       |   | Study: Alon_Colon Experiment Type: mRNA Analysis: Colon Type Class 1: Normal Colon (22) Class 2: Colon Adenocarcinoma (40) Ttest: 3.484 Pvalue: 0.001                    |
|       |   | Study: Notterman_Colon Experiment Type: mRNA Analysis: Colon Type Class 1: Normal Colon (18) Class 2: Colon Adenocarcinoma (18) Ttest: 3.409 Pvalue: 0.002               |
| ILF3  | 3 |                                                                                                                                                                          |
|       |   | Study: Ki_Colon Experiment Type: mRNA Analysis: Tissue Type Class 1: Adjacent Normal Colon Mucosa (28) Class 2: Primary Colon Carcinoma (53) Ttest: 9.196 Pvalue: 8.1E14 |
|       |   | Study: Notterman_Colon Experiment Type: mRNA Analysis: Colon Type Class 1: Normal Colon (18) Class 2: Colon Adenocarcinoma (18) Ttest: 4.259 Pvalue: 1.5E4               |

|        |   |                                                                                                                                                                          |
|--------|---|--------------------------------------------------------------------------------------------------------------------------------------------------------------------------|
|        |   | Study: Alon_Colon Experiment Type: mRNA Analysis: Colon Type Class 1: Normal Colon (22) Class 2: Colon Adenocarcinoma (40) Ttest: 3.592 Pvalue: 7.4E4                    |
| SNRPB2 | 3 |                                                                                                                                                                          |
|        |   | Study: Ki_Colon Experiment Type: mRNA Analysis: Tissue Type Class 1: Adjacent Normal Colon Mucosa (28) Class 2: Primary Colon Carcinoma (53) Ttest: 6.676 Pvalue: 4.2E9  |
|        |   | Study: Alon_Colon Experiment Type: mRNA Analysis: Colon Type Class 1: Normal Colon (22) Class 2: Colon Adenocarcinoma (40) Ttest: 4.078 Pvalue: 1.6E4                    |
|        |   | Study: Notterman_Colon Experiment Type: mRNA Analysis: Colon Type Class 1: Normal Colon (18) Class 2: Colon Adenocarcinoma (18) Ttest: 2.98 Pvalue: 0.005                |
| DKC1   | 2 |                                                                                                                                                                          |
|        |   | Study: Ki_Colon Experiment Type: mRNA Analysis: Tissue Type Class 1: Adjacent Normal Colon Mucosa (28) Class 2: Primary Colon Carcinoma (53) Ttest: 9.694 Pvalue: 6.8E15 |
|        |   | Study: Graudens_Colon Experiment Type: mRNA Analysis: Colon Type Class 1: Normal Colon (12) Class 2: Colorectal Carcinoma (18) Ttest: 8.545 Pvalue: 3.8E                 |
| NUFIP1 | 1 |                                                                                                                                                                          |

|      |   |                                                                                                                                                                           |
|------|---|---------------------------------------------------------------------------------------------------------------------------------------------------------------------------|
|      |   | Study: Ki_Colon Experiment Type: mRNA Analysis: Tissue Type Class 1: Adjacent Normal Colon Mucosa (28) Class 2: Primary Colon Carcinoma (53) Ttest: 12.808 Pvalue: 5.7E21 |
| RBM9 | 1 |                                                                                                                                                                           |
|      |   | Study: Graudens_Colon Experiment Type: mRNA Analysis: Colon Type Class 1: Normal Colon (12) Class 2: Colorectal Carcinoma (18) Ttest: 3.746 Pvalue: 8.7E4                 |

|         |   |                                                                                                                                                                         |
|---------|---|-------------------------------------------------------------------------------------------------------------------------------------------------------------------------|
| HNRPUL1 | 1 |                                                                                                                                                                         |
|         |   | Study: Ki_Colon Experiment Type: mRNA Analysis: Tissue Type Class 1: Adjacent Normal Colon Mucosa (28) Class 2: Primary Colon Carcinoma (53) Ttest: 4.194 Pvalue: 7.2E5 |
| FBL     | 4 |                                                                                                                                                                         |
|         |   | Study: Ki_Colon Experiment Type: mRNA Analysis: Tissue Type Class 1: Adjacent Normal Colon Mucosa (28) Class 2: Primary Colon Carcinoma (53) Ttest: 8.417 Pvalue: 4.2E1 |
|         |   | Study: Graudens_Colon Experiment Type: mRNA Analysis: Colon Type Class 1: Normal Colon (12) Class 2: Colorectal Carcinoma (18) Ttest: 6.844 Pvalue: 7E7                 |
|         |   | Study: Notterman_Colon Experiment Type: mRNA Analysis: Colon Type Class 1: Normal Colon (18) Class 2: Colon Adenocarcinoma (18) Ttest: 5.473 Pvalue: 4.2E6              |

|        |   |                                                                                                                                                                          |
|--------|---|--------------------------------------------------------------------------------------------------------------------------------------------------------------------------|
|        |   | Study: Alon_Colon Experiment Type: mRNA Analysis: Colon Type Class 1: Normal Colon (22) Class 2: Colon Adenocarcinoma (40) Ttest: 4.682 Pvalue: 4.1E5                    |
| EXOSC7 | 1 |                                                                                                                                                                          |
|        |   | Study: Notterman_Colon Experiment Type: mRNA Analysis: Colon Type Class 1: Normal Colon (18) Class 2: Colon Adenocarcinoma (18) Ttest: 4.221 Pvalue: 2E4                 |
| RBM8A  | 1 |                                                                                                                                                                          |
|        |   | Study: Ki_Colon Experiment Type: mRNA Analysis: Tissue Type Class 1: Adjacent Normal Colon Mucosa (28) Class 2: Primary Colon Carcinoma (53) Ttest: 7.731 Pvalue: 4.4E11 |
| NOL3   | 1 |                                                                                                                                                                          |
|        |   | Study: Graudens_Colon Experiment Type: mRNA Analysis: Colon Type Class 1: Normal Colon (12) Class 2: Colorectal Carcinoma (18) Ttest: 3.699 Pvalue: 0.001                |
| FUBP1  | 3 |                                                                                                                                                                          |
|        |   | Study: Notterman_Colon Experiment Type: mRNA Analysis: Colon Type Class 1: Normal Colon (18) Class 2: Colon Adenocarcinoma (18) Ttest: 4.69 Pvalue: 4.3E5                |
|        |   | Study: Ki_Colon Experiment Type: mRNA Analysis: Tissue Type Class 1: Adjacent Normal Colon Mucosa (28) Class 2: Primary Colon Carcinoma (53) Ttest: 4.031 Pvalue: 1.5E4  |

|       |   |                                                                                                                                                                         |
|-------|---|-------------------------------------------------------------------------------------------------------------------------------------------------------------------------|
|       |   | Study: Alon_Colon Experiment Type: mRNA Analysis: Colon Type Class 1: Normal Colon (22) Class 2: Colon Adenocarcinoma (40) Ttest: 3.509 Pvalue: 0.001                   |
| HNRPG | 3 |                                                                                                                                                                         |
|       |   | Study: Notterman_Colon Experiment Type: mRNA Analysis: Colon Type Class 1: Normal Colon (18) Class 2: Colon Adenocarcinoma (18) Ttest: 6.324 Pvalue: 3.4E7              |
|       |   | Study: Graudens_Colon Experiment Type: mRNA Analysis: Colon Type Class 1: Normal Colon (12) Class 2: Colorectal Carcinoma (18) Ttest: 4.065 Pvalue: 3.6E4               |
|       |   | Study: Alon_Colon Experiment Type: mRNA Analysis: Colon Type Class 1: Normal Colon (22) Class 2: Colon Adenocarcinoma (40) Ttest: 2.765 Pvalue: 0.008                   |
| HARS  | 1 |                                                                                                                                                                         |
|       |   | Study: Ki_Colon Experiment Type: mRNA Analysis: Tissue Type Class 1: Adjacent Normal Colon Mucosa (28) Class 2: Primary Colon Carcinoma (53) Ttest: 3.586 Pvalue: 5.8E4 |
| HNPRU | 2 |                                                                                                                                                                         |
|       |   | Study: Graudens_Colon Experiment Type: mRNA Analysis: Colon Type Class 1: Normal Colon (12) Class 2: Colorectal Carcinoma (18) Ttest: 3.83 Pvalue: 7.6E4                |

|        |   |                                                                                                                                                            |
|--------|---|------------------------------------------------------------------------------------------------------------------------------------------------------------|
|        |   | Study: Notterman_Colon Experiment Type: mRNA Analysis: Colon Type Class 1: Normal Colon (18) Class 2: Colon Adenocarcinoma (18) Ttest: 3.605 Pvalue: 0.001 |
| EIF3S9 | 2 |                                                                                                                                                            |
|        |   | Study: Graudens_Colon Experiment Type: mRNA Analysis: Colon Type Class 1: Normal Colon (12) Class 2: Colorectal Carcinoma (18) Ttest: 6.376 Pvalue: 1.1E6  |

|        |   |                                                                                                                                                                                  |
|--------|---|----------------------------------------------------------------------------------------------------------------------------------------------------------------------------------|
|        |   | Study: Ki_Colon Experiment Type: mRNA Analysis:<br>Tissue Type Class 1: Adjacent Normal<br>Colon Mucosa (28) Class 2: Primary Colon<br>Carcinoma (53) Ttest: 3.698 Pvalue: 5.2E4 |
| EIF3S4 | 1 |                                                                                                                                                                                  |
|        |   | Study: Ki_Colon Experiment Type: mRNA Analysis:<br>Tissue Type Class 1: Adjacent Normal<br>Colon Mucosa (28) Class 2: Primary Colon<br>Carcinoma (53) Ttest: 4.78 Pvalue: 9.7E6  |
| RPL12  | 2 |                                                                                                                                                                                  |
|        |   | Study: Graudens_Colon Experiment Type: mRNA<br>Analysis: Colon Type Class 1: Normal Colon (12)<br>Class 2: Colorectal Carcinoma (18) Ttest: 7.558<br>Pvalue: 3.4E8               |
|        |   | Study: Ki_Colon Experiment Type: mRNA Analysis:<br>Tissue Type Class 1: Adjacent Normal<br>Colon Mucosa (28) Class 2: Primary Colon<br>Carcinoma (53) Ttest: 5.724 Pvalue: 1.8E7 |
| NKRF   | 1 |                                                                                                                                                                                  |

|       |   |                                                                                                                                                                                   |
|-------|---|-----------------------------------------------------------------------------------------------------------------------------------------------------------------------------------|
|       |   | Study: Ki_Colon Experiment Type: mRNA Analysis:<br>Tissue Type Class 1: Adjacent Normal<br>Colon Mucosa (28) Class 2: Primary Colon<br>Carcinoma (53) Ttest: 3.707 Pvalue: 3.9E4  |
| NCL   | 3 |                                                                                                                                                                                   |
|       |   | Study: Ki_Colon Experiment Type: mRNA Analysis:<br>Tissue Type Class 1: Adjacent Normal<br>Colon Mucosa (28) Class 2: Primary Colon<br>Carcinoma (53) Ttest: 8.445 Pvalue: 1.5E12 |
|       |   | Study: Graudens_Colon Experiment Type: mRNA<br>Analysis: Colon Type Class 1: Normal Colon (12)<br>Class 2: Colorectal Carcinoma (18) Ttest: 3.927<br>Pvalue: 0.001                |
|       |   | Study: Alon_Colon Experiment Type: mRNA<br>Analysis: Colon Type Class 1: Normal Colon (22)<br>Class 2: Colon Adenocarcinoma (40) Ttest: 3.372<br>Pvalue: 0.001                    |
| LSM5  | 1 |                                                                                                                                                                                   |
|       |   | Study: Ki_Colon Experiment Type: mRNA Analysis:<br>Tissue Type Class 1: Adjacent Normal<br>Colon Mucosa (28) Class 2: Primary Colon<br>Carcinoma (53) Ttest: 3.044 Pvalue: 0.003  |
| SAFB1 | 1 |                                                                                                                                                                                   |
|       |   | Study: Ki_Colon Experiment Type: mRNA Analysis:<br>Tissue Type Class 1: Adjacent Normal<br>Colon Mucosa (28) Class 2: Primary Colon<br>Carcinoma (53) Ttest: 4.815 Pvalue: 7E6    |
| DSRAD | 1 |                                                                                                                                                                                   |

|        |   |                                                                                                                                                                                  |
|--------|---|----------------------------------------------------------------------------------------------------------------------------------------------------------------------------------|
|        |   | Study: Ki_Colon Experiment Type: mRNA Analysis:<br>Tissue Type Class 1: Adjacent Normal<br>Colon Mucosa (28) Class 2: Primary Colon<br>Carcinoma (53) Ttest: 2.822 Pvalue: 0.006 |
| NHP2L1 | 2 |                                                                                                                                                                                  |
|        |   | Study: Graudens_Colon Experiment Type: mRNA<br>Analysis: Colon Type Class 1: Normal Colon (12)<br>Class 2: Colorectal Carcinoma (18) Ttest:<br>3.25 Pvalue: 0.003                |
|        |   | Study: Hong_Colon Experiment Type: mRNA<br>Analysis: Colonic Mucosa Type Class 1: Normal<br>(10) Class 2: Adjacent NonTumoral (12) Ttest:<br>3.117 Pvalue: 0.006                 |
| NPM1   | 4 |                                                                                                                                                                                  |
|        |   | Study: Notterman_Colon Experiment Type: mRNA<br>Analysis: Colon Type Class 1: Normal Colon (18)<br>Class 2: Colon Adenocarcinoma (18) Ttest: 9.858<br>Pvalue: 1.8E11             |
|        |   | Study: Ki_Colon Experiment Type: mRNA Analysis:<br>Tissue Type Class 1: Adjacent Normal<br>Colon Mucosa (28) Class 2: Primary Colon<br>Carcinoma (53) Ttest: 6.77 Pvalue: 2.1E9  |
|        |   | Study: Alon_Colon Experiment Type: mRNA<br>Analysis: Colon Type Class 1: Normal Colon (22)<br>Class 2: Colon Adenocarcinoma (40) Ttest: 5.672<br>Pvalue: 5.3E7                   |

|      |   |                                                                                                                                                                                   |
|------|---|-----------------------------------------------------------------------------------------------------------------------------------------------------------------------------------|
|      |   | Study: Graudens_Colon Experiment Type: mRNA<br>Analysis: Colon Type Class 1: Normal Colon (12)<br>Class 2: Colorectal Carcinoma (18) Ttest: 5.075<br>Pvalue: 2.9E5                |
| MARS | 3 |                                                                                                                                                                                   |
|      |   | Study: Ki_Colon Experiment Type: mRNA Analysis:<br>Tissue Type Class 1: Adjacent Normal<br>Colon Mucosa (28) Class 2: Primary Colon<br>Carcinoma (53) Ttest: 7.295 Pvalue: 2.1E10 |

|        |   |                                                                                                                                                                                |
|--------|---|--------------------------------------------------------------------------------------------------------------------------------------------------------------------------------|
|        |   | Study: Graudens_Colon Experiment Type: mRNA<br>Analysis: Colon Type Class 1: Normal Colon (12)<br>Class 2: Colorectal Carcinoma (18) Ttest: 5.509<br>Pvalue: 7.7E6             |
|        |   | Study: Notterman_Colon Experiment Type: mRNA<br>Analysis: Colon Type Class 1: Normal Colon (18)<br>Class 2: Colon Adenocarcinoma (18) Ttest: 3.909<br>Pvalue: 4.4E4            |
| MRPL23 | 2 |                                                                                                                                                                                |
|        |   | Study: Ki_Colon Experiment Type: mRNA Analysis:<br>Tissue Type Class 1: Adjacent Normal<br>Colon Mucosa (28) Class 2: Primary Colon<br>Carcinoma (53) Ttest: 3.933 Pvalue: 2E4 |
|        |   | Study: Graudens_Colon Experiment Type: mRNA<br>Analysis: Colon Type Class 1: Normal Colon (12)<br>Class 2: Colorectal Carcinoma (18) Ttest: 4.006<br>Pvalue: 4.2E4             |
| HNRPL  | 1 |                                                                                                                                                                                |

|      |   |                                                                                                                                                                                   |
|------|---|-----------------------------------------------------------------------------------------------------------------------------------------------------------------------------------|
|      |   | Study: Notterman_Colon Experiment Type: mRNA<br>Analysis: Colon Type Class 1: Normal Colon (18)<br>Class 2: Colon Adenocarcinoma (18) Ttest: 3.045<br>Pvalue: 0.004               |
| NONO | 4 |                                                                                                                                                                                   |
|      |   | Study: Ki_Colon Experiment Type: mRNA Analysis:<br>Tissue Type Class 1: Adjacent Normal<br>Colon Mucosa (28) Class 2: Primary Colon<br>Carcinoma (53) Ttest: 7.505 Pvalue: 8.1E11 |
|      |   | Study: Notterman_Colon Experiment Type: mRNA<br>Analysis: Colon Type Class 1: Normal Colon (18)<br>Class 2: Colon Adenocarcinoma (18) Ttest: 6.206<br>Pvalue: 1.2E6               |
|      |   | Study: Graudens_Colon Experiment Type: mRNA<br>Analysis: Colon Type Class 1: Normal Colon (12)<br>Class 2: Colorectal Carcinoma (18) Ttest: 6.099<br>Pvalue: 1.8E6                |
|      |   | Study: Alon_Colon Experiment Type: mRNA<br>Analysis: Colon Type Class 1: Normal Colon (22)<br>Class 2: Colon Adenocarcinoma (40) Ttest: 3.885<br>Pvalue: 3.1E4                    |
| LA   | 2 |                                                                                                                                                                                   |
|      |   | Study: Ki_Colon Experiment Type: mRNA Analysis:<br>Tissue Type Class 1: Adjacent Normal<br>Colon Mucosa (28) Class 2: Primary Colon<br>Carcinoma (53) Ttest: 7.96 Pvalue: 1.1E11  |

|       |   |                                                                                                                                                                                  |
|-------|---|----------------------------------------------------------------------------------------------------------------------------------------------------------------------------------|
|       |   | Study: Notterman_Colon Experiment Type: mRNA<br>Analysis: Colon Type Class 1: Normal Colon (18)<br>Class 2: Colon Adenocarcinoma (18) Ttest: 4.376<br>Pvalue: 1.3E4              |
| TIAR  | 1 |                                                                                                                                                                                  |
|       |   | Study: Ki_Colon Experiment Type: mRNA Analysis:<br>Tissue Type Class 1: Adjacent Normal<br>Colon Mucosa (28) Class 2: Primary Colon<br>Carcinoma (53) Ttest: 5.328 Pvalue: 9.6E7 |
| RPL34 | 1 |                                                                                                                                                                                  |
|       |   | Study: Graudens_Colon Experiment Type: mRNA<br>Analysis: Colon Type Class 1: Normal Colon (12)<br>Class 2: Colorectal Carcinoma (18) Ttest: 4.604<br>Pvalue: 8.5E5               |
| MRPL3 | 2 |                                                                                                                                                                                  |
|       |   | Study: Notterman_Colon Experiment Type: mRNA<br>Analysis: Colon Type Class 1: Normal Colon (18)<br>Class 2: Colon Adenocarcinoma (18) Ttest: 4.567<br>Pvalue: 1.6E4              |
|       |   | Study: Graudens_Colon Experiment Type: mRNA<br>Analysis: Colon Type Class 1: Normal Colon (12)<br>Class 2: Colorectal Carcinoma (18) Ttest: 3.126<br>Pvalue: 0.004               |
| RBM26 | 1 |                                                                                                                                                                                  |
|       |   | Study: Ki_Colon Experiment Type: mRNA Analysis:<br>Tissue Type Class 1: Adjacent Normal<br>Colon Mucosa (28) Class 2: Primary Colon<br>Carcinoma (53) Ttest: 3.378 Pvalue: 0.00  |
| RPL13 | 2 |                                                                                                                                                                                  |

|       |   |                                                                                                                                                                     |
|-------|---|---------------------------------------------------------------------------------------------------------------------------------------------------------------------|
|       |   | Study: Graudens_Colon Experiment Type: mRNA<br>Analysis: Colon Type Class 1: Normal Colon (12)<br>Class 2: Colorectal Carcinoma (18) Ttest:<br>6.19 Pvalue: 1.1E6   |
|       |   | Study: Notterman_Colon Experiment Type: mRNA<br>Analysis: Colon Type Class 1: Normal Colon (18)<br>Class 2: Colon Adenocarcinoma (18) Ttest: 3.615<br>Pvalue: 9.7E4 |
| RPL18 | 1 |                                                                                                                                                                     |

|       |   |                                                                                                                                                                         |
|-------|---|-------------------------------------------------------------------------------------------------------------------------------------------------------------------------|
|       |   | Study: Graudens_Colon Experiment Type: mRNA Analysis: Colon Type Class 1: Normal Colon (12) Class 2: Colorectal Carcinoma (18) Ttest: 3.77 Pvalue: 8E4                  |
| SLBP  | 1 |                                                                                                                                                                         |
|       |   | Study: Ki_Colon Experiment Type: mRNA Analysis: Tissue Type Class 1: Adjacent Normal Colon Mucosa (28) Class 2: Primary Colon Carcinoma (53) Ttest: 3.999 Pvalue: 1.4E4 |
| RBPMS | 1 |                                                                                                                                                                         |
|       |   | Study: Hong_Colon Experiment Type: mRNA Analysis: Colonic Mucosa Type Class 1: Normal (10) Class 2: Adjacent NonTumoral (12) Ttest: 4.42 Pvalue: 4.9E4                  |
| RPLP2 | 1 |                                                                                                                                                                         |
|       |   | Study: Graudens_Colon Experiment Type: mRNA Analysis: Colon Type Class 1: Normal Colon (12) Class 2: Colorectal Carcinoma (18) Ttest: 2.863 Pvalue: 0.008               |
| RPL7  | 1 |                                                                                                                                                                         |

|         |   |                                                                                                                                                                         |
|---------|---|-------------------------------------------------------------------------------------------------------------------------------------------------------------------------|
|         |   | Study: Notterman_Colon Experiment Type: mRNA Analysis: Colon Type Class 1: Normal Colon (18) Class 2: Colon Adenocarcinoma (18) Ttest: 3.015 Pvalue: 0.005              |
| RPS5    | 2 |                                                                                                                                                                         |
|         |   | Study: Graudens_Colon Experiment Type: mRNA Analysis: Colon Type Class 1: Normal Colon (12) Class 2: Colorectal Carcinoma (18) Ttest: 5.467 Pvalue: 8.3E6               |
|         |   | Study: Ki_Colon Experiment Type: mRNA Analysis: Tissue Type Class 1: Adjacent Normal Colon Mucosa (28) Class 2: Primary Colon Carcinoma (53) Ttest: 2.958 Pvalue: 0.004 |
| SIAHBP1 | 1 |                                                                                                                                                                         |
|         |   | Study: Graudens_Colon Experiment Type: mRNA Analysis: Colon Type Class 1: Normal Colon (12) Class 2: Colorectal Carcinoma (18) Ttest: 3.019 Pvalue: 0.009               |
| RPL28   |   |                                                                                                                                                                         |
|         |   | Study: Ki_Colon Experiment Type: mRNA Analysis: Tissue Type Class 1: Adjacent Normal Colon Mucosa (28) Class 2: Primary Colon Carcinoma (53) Ttest: 4.952 Pvalue: 4.1E6 |
|         |   | Study: Notterman_Colon Experiment Type: mRNA Analysis: Colon Type Class 1: Normal Colon (18) Class 2: Colon Adenocarcinoma (18) Ttest: 2.935 Pvalue: 0.007              |
| RPS17   | 1 |                                                                                                                                                                         |

|       |   |                                                                                                                                                                          |
|-------|---|--------------------------------------------------------------------------------------------------------------------------------------------------------------------------|
|       |   | Study: Graudens_Colon Experiment Type: mRNA Analysis: Colon Type Class 1: Normal Colon (12) Class 2: Colorectal Carcinoma (18) Ttest: 3.212 Pvalue: 0.004                |
| RBM19 | 1 |                                                                                                                                                                          |
|       |   | Study: Graudens_Colon Experiment Type: mRNA Analysis: Colon Type Class 1: Normal Colon (12) Class 2: Colorectal Carcinoma (18) Ttest: 3.874 Pvalue: 7E4                  |
| PCBP1 | 1 |                                                                                                                                                                          |
|       |   | Study: Ki_Colon Experiment Type: mRNA Analysis: Tissue Type Class 1: Adjacent Normal Colon Mucosa (28) Class 2: Primary Colon Carcinoma (53) Ttest: 7.708 Pvalue: 3.2E11 |
| PABP2 | 1 |                                                                                                                                                                          |
|       |   | Study: Ki_Colon Experiment Type: mRNA Analysis: Tissue Type Class 1: Adjacent Normal Colon Mucosa (28) Class 2: Primary Colon Carcinoma (53) Ttest: 2.699 Pvalue: 0.009  |
| RBM14 | 1 |                                                                                                                                                                          |
|       |   | Study: Graudens_Colon Experiment Type: mRNA Analysis: Colon Type Class 1: Normal Colon (12) Class 2: Colorectal Carcinoma (18) Ttest: 4.354 Pvalue: 2.8E4                |
| RBM10 | 1 |                                                                                                                                                                          |
|       |   | Study: Ki_Colon Experiment Type: mRNA Analysis: Tissue Type Class 1: Adjacent Normal Colon Mucosa (28) Class 2: Primary Colon Carcinoma (53) Ttest: 4.784 Pvalue: 7.9E6  |
| RPS3  | 3 |                                                                                                                                                                          |

|  |  |                                                                                                                                                           |
|--|--|-----------------------------------------------------------------------------------------------------------------------------------------------------------|
|  |  | Study: Graudens_Colon Experiment Type: mRNA Analysis: Colon Type Class 1: Normal Colon (12) Class 2: Colorectal Carcinoma (18) Ttest: 4.974 Pvalue: 3.3E5 |
|--|--|-----------------------------------------------------------------------------------------------------------------------------------------------------------|

|       |   |                                                                                                                                                                                 |
|-------|---|---------------------------------------------------------------------------------------------------------------------------------------------------------------------------------|
|       |   | Study: Alon_Colon Experiment Type: mRNA<br>Analysis: Colon Type Class 1: Normal Colon (22)<br>Class 2: Colon Adenocarcinoma (40) Ttest: 4.086<br>Pvalue: 2.4E4                  |
|       |   | Study: Notterman_Colon Experiment Type: mRNA<br>Analysis: Colon Type Class 1: Normal Colon (18)<br>Class 2: Colon Adenocarcinoma (18) Ttest: 3.688<br>Pvalue: 9E4               |
| ELAV1 | 1 |                                                                                                                                                                                 |
|       |   | Study: Ki_Colon Experiment Type: mRNA Analysis:<br>Tissue Type Class 1: Adjacent Normal<br>Colon Mucosa (28) Class 2: Primary Colon<br>Carcinoma (53) Ttest: 6.61 Pvalue: 6.4E9 |

| Name           | # of Studies | Study Details                                                                                                                                                                    |
|----------------|--------------|----------------------------------------------------------------------------------------------------------------------------------------------------------------------------------|
| DKFZp686F02235 | 1            |                                                                                                                                                                                  |
|                |              | Study: Hong_Colon Experiment Type: mRNA<br>Analysis: Colonic Mucosa Type Class 1: Normal<br>(10) Class 2: Adjacent NonTumoral (12) Ttest:<br>4.005 Pvalue: 8.3E4                 |
| RNASE1         | 1            |                                                                                                                                                                                  |
|                |              | Study: Ki_Colon Experiment Type: mRNA Analysis:<br>Tissue Type Class 1: Adjacent Normal<br>Colon Mucosa (28) Class 2: Primary Colon<br>Carcinoma (53) Ttest: 6.219 Pvalue: 5.4E8 |

| Name   | # of Studies | Study Details                                                                                                                                                                                 |
|--------|--------------|-----------------------------------------------------------------------------------------------------------------------------------------------------------------------------------------------|
| NKRF   | 1            |                                                                                                                                                                                               |
|        |              | Study: Hippo_Gastric<br>Experiment Type: mRNA<br>Analysis: Gastric Tissue Type<br>Class 1: Normal (8) Class 2:<br>Gastric Carcinoma (22)<br>Ttest: 3.227 Pvalue: 0.01<br>Y07707_at Reporter:  |
| FUBP1  | 1            |                                                                                                                                                                                               |
|        |              | Study: Hippo_Gastric<br>Experiment Type: mRNA<br>Analysis: Gastric Tissue Type<br>Class 1: Normal (8) Class 2:<br>Gastric Carcinoma (22)<br>Ttest: 3.992 Pvalue:<br>0.002 U05040_at Reporter: |
| CSTF2  | 1            |                                                                                                                                                                                               |
|        |              | Study: Hippo_Gastric<br>Experiment Type: mRNA<br>Analysis: Gastric Tissue Type<br>Class 1: Normal (8) Class 2:<br>Gastric Carcinoma (22)<br>Ttest: 3.902 Pvalue:<br>0.004 M85085_at Reporter: |
| FXR1   | 1            |                                                                                                                                                                                               |
|        |              | Study: Hippo_Gastric<br>Experiment Type: mRNA<br>Analysis: Gastric Tissue Type<br>Class 1: Normal (8) Class 2:<br>Gastric Carcinoma (22)<br>Ttest: 3.795 Pvalue:<br>0.002 U25165_at Reporter: |
| NONO   | 1            |                                                                                                                                                                                               |
|        |              | Study: Hippo_Gastric<br>Experiment Type: mRNA<br>Analysis: Gastric Tissue Type<br>Class 1: Normal (8) Class 2:<br>Gastric Carcinoma (22)<br>Ttest: 3.865 Pvalue: 9E4                          |
| EIF3S9 | 1            |                                                                                                                                                                                               |

|      |   |                                                                                                                                                                  |
|------|---|------------------------------------------------------------------------------------------------------------------------------------------------------------------|
|      |   | Study: Hippo_Gastric Experiment Type: mRNA<br>Analysis: Gastric Tissue Type Class 1: Normal (8)<br>Class 2: Gastric Carcinoma (22) Ttest: 3.865<br>Pvalue: 9E4   |
| RO60 | 1 |                                                                                                                                                                  |
|      |   | Study: Hippo_Gastric Experiment Type: mRNA<br>Analysis: Gastric Tissue Type Class 1: Normal (8)<br>Class 2: Gastric Carcinoma (22) Ttest: 4.128<br>Pvalue: 0.002 |

| Name | # of Studies | Study Details |
|------|--------------|---------------|
| RPL7 | 1            |               |



|         |   |                                                                                                                                                                            |
|---------|---|----------------------------------------------------------------------------------------------------------------------------------------------------------------------------|
|         |   | Study: Wurnbach_Liver Experiment Type: mRNA<br>Analysis: Liver Type Class 1: Normal Liver (10)<br>Class 2: Hepatocellular Carcinoma (35) Ttest: 3.778<br>Pvalue: 0.001     |
| SIAHBP1 | 3 |                                                                                                                                                                            |
|         |   | Study: Chen_Liver Experiment Type: mRNA<br>Analysis: Liver Type Class 1: Nontumor Liver (76)<br>Class 2: Hepatocellular Carcinoma (104) Ttest:<br>4.722 Pvalue: 4.9E6      |
|         |   | Study: Wurnbach_Liver Experiment Type: mRNA<br>Analysis: Liver Type Class 1: Normal Liver (10)<br>Class 2: Hepatocellular Carcinoma (35) Ttest: 4.539<br>Pvalue: 5E5       |
|         |   | Study: Chen_Liver Experiment Type: mRNA<br>Analysis: Liver Type Class 1: Benign Liver<br>Disease (7) Class 2: Hepatocellular<br>Carcinoma (104) Ttest: 4.377 Pvalue: 9.5E4 |
| HNRPG   | 2 |                                                                                                                                                                            |
|         |   | Study: Chen_Liver Experiment Type: mRNA<br>Analysis: Liver Type Class 1: Nontumor Liver (76)<br>Class 2: Hepatocellular Carcinoma (104) Ttest:<br>3.957 Pvalue: 1.1E4      |
|         |   | Study: Wurnbach_Liver Experiment Type: mRNA<br>Analysis: Liver Type Class 1: Normal Liver (10)<br>Class 2: Hepatocellular Carcinoma (35) Ttest: 3.878<br>Pvalue: 0.001     |
| HNRPLL  | 1 |                                                                                                                                                                            |

|        |   |                                                                                                                                                                        |
|--------|---|------------------------------------------------------------------------------------------------------------------------------------------------------------------------|
|        |   | Study: Chen_Liver Experiment Type: mRNA<br>Analysis: Liver Type Class 1: Nontumor Liver (76)<br>Class 2: Hepatocellular Carcinoma (104) Ttest:<br>5.503 Pvalue: 1.4E7  |
| SNRPA  | 2 |                                                                                                                                                                        |
|        |   | Study: Wurnbach_Liver Experiment Type: mRNA<br>Analysis: Liver Type Class 1: Normal Liver (10)<br>Class 2: Hepatocellular Carcinoma (35) Ttest: 5.169<br>Pvalue: 3.5E5 |
|        |   | Study: Chen_Liver Experiment Type: mRNA<br>Analysis: Liver Type Class 1: Nontumor Liver (76)<br>Class 2: Hepatocellular Carcinoma (104) Ttest:<br>2.663 Pvalue: 0.009  |
| NCBP2  | 1 |                                                                                                                                                                        |
|        |   | Study: Chen_Liver Experiment Type: mRNA<br>Analysis: Liver Type Class 1: Nontumor Liver (76)<br>Class 2: Hepatocellular Carcinoma (104) Ttest:<br>3.355 Pvalue: 9.7E4  |
| PTBP1  | 1 |                                                                                                                                                                        |
|        |   | Study: Wurnbach_Liver Experiment Type: mRNA<br>Analysis: Liver Type Class 1: Normal Liver (10)<br>Class 2: Hepatocellular Carcinoma (35) Ttest: 3.339<br>Pvalue: 0.005 |
| SF3B14 | 1 |                                                                                                                                                                        |
|        |   | Study: Chen_Liver Experiment Type: mRNA<br>Analysis: Liver Type Class 1: Nontumor Liver (76)<br>Class 2: Hepatocellular Carcinoma (104) Ttest:<br>3.406 Pvalue: 8.2E4  |
| SF3B4  | 2 |                                                                                                                                                                        |

|        |   |                                                                                                                                                                        |
|--------|---|------------------------------------------------------------------------------------------------------------------------------------------------------------------------|
|        |   | Study: Chen_Liver Experiment Type: mRNA<br>Analysis: Liver Type Class 1: Nontumor Liver (76)<br>Class 2: Hepatocellular Carcinoma (104) Ttest:<br>9.428 Pvalue: 3.1E17 |
|        |   | Study: Wurnbach_Liver Experiment Type: mRNA<br>Analysis: Liver Type Class 1: Normal Liver (10)<br>Class 2: Hepatocellular Carcinoma (35) Ttest: 5.941<br>Pvalue: 4.8E6 |
| RPS5   | 1 |                                                                                                                                                                        |
|        |   | Study: Chen_Liver Experiment Type: mRNA<br>Analysis: Liver Type Class 1: Nontumor Liver (76)<br>Class 2: Hepatocellular Carcinoma (104) Ttest:<br>6.007 Pvalue: 1.3E8  |
| EIF3S9 | 2 |                                                                                                                                                                        |
|        |   | Study: Chen_Liver Experiment Type: mRNA<br>Analysis: Liver Type Class 1: Nontumor Liver (76)<br>Class 2: Hepatocellular Carcinoma (104) Ttest:<br>5.002 Pvalue: 1.4E6  |
|        |   | Study: Wurnbach_Liver Experiment Type: mRNA<br>Analysis: Liver Type Class 1: Normal Liver (10)<br>Class 2: Hepatocellular Carcinoma (35) Ttest: 3.406<br>Pvalue: 0.003 |
| PAPOLG | 1 |                                                                                                                                                                        |
|        |   | Study: Wurnbach_Liver Experiment Type: mRNA<br>Analysis: Liver Type Class 1: Normal Liver (10)<br>Class 2: Hepatocellular Carcinoma (35) Ttest: 4.392<br>Pvalue: 2.3E4 |
| FUBP1  | 1 |                                                                                                                                                                        |

|              |   |                                                                                                                                                                        |
|--------------|---|------------------------------------------------------------------------------------------------------------------------------------------------------------------------|
|              |   | Study: Chen_Liver Experiment Type: mRNA<br>Analysis: Liver Type Class 1: Nontumor Liver (76)<br>Class 2: Hepatocellular Carcinoma (104) Ttest:<br>3.75 Pvalue: 2.4E4   |
| DKC1         | 1 |                                                                                                                                                                        |
|              |   | Study: Wurmbach_Liver Experiment Type: mRNA<br>Analysis: Liver Type Class 1: Normal Liver (10)<br>Class 2: Hepatocellular Carcinoma (35) Ttest: 3.097<br>Pvalue: 0.007 |
| MGC104<br>33 | 1 |                                                                                                                                                                        |
|              |   | Study: Wurmbach_Liver Experiment Type: mRNA<br>Analysis: Liver Type Class 1: Normal Liver (10)<br>Class 2: Hepatocellular Carcinoma (35) Ttest: 4.062<br>Pvalue: 5.9E4 |
| IGF2BP2      | 1 |                                                                                                                                                                        |
|              |   | Study: Wurmbach_Liver Experiment Type: mRNA<br>Analysis: Liver Type Class 1: Normal Liver (10)<br>Class 2: Hepatocellular Carcinoma (35) Ttest:<br>8.36 Pvalue: 3.7E10 |
| NUFIP1       | 1 |                                                                                                                                                                        |
|              |   | Study: Wurmbach_Liver Experiment Type: mRNA<br>Analysis: Liver Type Class 1: Normal Liver (10)<br>Class 2: Hepatocellular Carcinoma (35) Ttest: 3.634<br>Pvalue: 0.002 |
| TIA1         | 1 |                                                                                                                                                                        |
|              |   | Study: Chen_Liver Experiment Type: mRNA<br>Analysis: Liver Type Class 1: Nontumor Liver (76)<br>Class 2: Hepatocellular Carcinoma (104) Ttest:<br>2.803 Pvalue: 0.006  |
| PNPT1        | 1 |                                                                                                                                                                        |

|         |   |                                                                                                                                                                        |
|---------|---|------------------------------------------------------------------------------------------------------------------------------------------------------------------------|
|         |   | Study: Wurmbach_Liver Experiment Type: mRNA<br>Analysis: Liver Type Class 1: Normal Liver (10)<br>Class 2: Hepatocellular Carcinoma (35) Ttest: 3.224<br>Pvalue: 0.006 |
| RNMT    | 2 |                                                                                                                                                                        |
|         |   | Study: Chen_Liver Experiment Type: mRNA<br>Analysis: Liver Type Class 1: Nontumor Liver (76)<br>Class 2: Hepatocellular Carcinoma (104) Ttest:<br>5.015 Pvalue: 1.5E6  |
|         |   | Study: Wurmbach_Liver Experiment Type: mRNA<br>Analysis: Liver Type Class 1: Normal Liver (10)<br>Class 2: Hepatocellular Carcinoma (35) Ttest: 5.312<br>Pvalue: 3.9E6 |
| RCAN3   | 2 |                                                                                                                                                                        |
|         |   | Study: Chen_Liver Experiment Type: mRNA<br>Analysis: Liver Type Class 1: Nontumor Liver (76)<br>Class 2: Hepatocellular Carcinoma (104) Ttest:<br>3.914 Pvalue: 1.3E4  |
|         |   | Study: Wurmbach_Liver Experiment Type: mRNA<br>Analysis: Liver Type Class 1: Normal Liver (10)<br>Class 2: Hepatocellular Carcinoma (35) Ttest: 3.348<br>Pvalue: 0.002 |
| IGF2BP3 | 2 |                                                                                                                                                                        |
|         |   | Study: Wurmbach_Liver Experiment Type: mRNA<br>Analysis: Liver Type Class 1: Normal Liver (10)<br>Class 2: Hepatocellular Carcinoma (35) Ttest: 5.735<br>Pvalue: 1.6E6 |

|             |   |                                                                                                                                                                        |
|-------------|---|------------------------------------------------------------------------------------------------------------------------------------------------------------------------|
|             |   | Study: Chen_Liver Experiment Type: mRNA<br>Analysis: Liver Type Class 1: Nontumor Liver (76)<br>Class 2: Hepatocellular Carcinoma (104) Ttest:<br>3.961 Pvalue: 1.1E4  |
| HNRPUL<br>1 | 2 |                                                                                                                                                                        |
|             |   | Study: Chen_Liver Experiment Type: mRNA<br>Analysis: Liver Type Class 1: Nontumor Liver (76)<br>Class 2: Hepatocellular Carcinoma (104) Ttest:<br>6.618 Pvalue: 4.7E10 |
|             |   | Study: Wurmbach_Liver Experiment Type: mRNA<br>Analysis: Liver Type Class 1: Normal Liver (10)<br>Class 2: Hepatocellular Carcinoma (35) Ttest: 2.989<br>Pvalue: 0.005 |
| RBM9        | 1 |                                                                                                                                                                        |
|             |   | Study: Chen_Liver Experiment Type: mRNA<br>Analysis: Liver Type Class 1: Nontumor Liver (76)<br>Class 2: Hepatocellular Carcinoma (104) Ttest:<br>4.079 Pvalue: 6.8E5  |
| CPSF6       | 2 |                                                                                                                                                                        |
|             |   | Study: Chen_Liver Experiment Type: mRNA<br>Analysis: Liver Type Class 1: Nontumor Liver (76)<br>Class 2: Hepatocellular Carcinoma (104) Ttest:<br>4.514 Pvalue: 1.2E5  |
|             |   | Study: Wurmbach_Liver Experiment Type: mRNA<br>Analysis: Liver Type Class 1: Normal Liver (10)<br>Class 2: Hepatocellular Carcinoma (35) Ttest: 4.717<br>Pvalue: 4.3E4 |

|               |   |                                                                                                                                                                            |
|---------------|---|----------------------------------------------------------------------------------------------------------------------------------------------------------------------------|
| RPL18         | 1 |                                                                                                                                                                            |
|               |   | Study: Chen_Liver Experiment Type: mRNA<br>Analysis: Liver Type Class 1: Nontumor Liver (76)<br>Class 2: Hepatocellular Carcinoma (104) Ttest:<br>3.168 Pvalue: 0.002      |
| GARS          | 1 |                                                                                                                                                                            |
|               |   | Study: Chen_Liver Experiment Type: mRNA<br>Analysis: Liver Type Class 1: Nontumor Liver (76)<br>Class 2: Hepatocellular Carcinoma (104) Ttest:<br>5.811 Pvalue: 3E8        |
| RBM8A         | 1 |                                                                                                                                                                            |
|               |   | Study: Chen_Liver Experiment Type: mRNA<br>Analysis: Liver Type Class 1: Nontumor Liver (76)<br>Class 2: Hepatocellular Carcinoma (104) Ttest:<br>3.311 Pvalue: 0.00       |
| APOBEC<br>1   | 1 |                                                                                                                                                                            |
|               |   | Study: Chen_Liver Experiment Type: mRNA<br>Analysis: Liver Type Class 1: Benign Liver<br>Disease (7) Class 2: Hepatocellular<br>Carcinoma (104) Ttest: 6.621 Pvalue: 2.8E9 |
| RBM28         | 1 |                                                                                                                                                                            |
|               |   | Study: Wurnbach_Liver Experiment Type: mRNA<br>Analysis: Liver Type Class 1: Normal Liver (10)<br>Class 2: Hepatocellular Carcinoma (35) Ttest: 3.967<br>Pvalue: 5E4       |
| C20orf11<br>9 | 1 |                                                                                                                                                                            |
|               |   | Study: Wurnbach_Liver Experiment Type: mRNA<br>Analysis: Liver Type Class 1: Normal Liver (10)<br>Class 2: Hepatocellular Carcinoma (35) Ttest: 3.315<br>Pvalue: 0.002     |
| ANKRD1<br>7   | 1 |                                                                                                                                                                            |
|               |   | Study: Wurnbach_Liver Experiment Type: mRNA<br>Analysis: Liver Type Class 1: Normal Liver (10)<br>Class 2: Hepatocellular Carcinoma (35) Ttest: 4.161<br>Pvalue: 1.5E4     |
| NONO          | 2 |                                                                                                                                                                            |
|               |   | Study: Chen_Liver Experiment Type: mRNA<br>Analysis: Liver Type Class 1: Nontumor Liver (76)<br>Class 2: Hepatocellular Carcinoma (104) Ttest:<br>4.604 Pvalue: 7.9E6      |
|               |   | Study: Wurnbach_Liver Experiment Type: mRNA<br>Analysis: Liver Type Class 1: Normal Liver (10)<br>Class 2: Hepatocellular Carcinoma (35) Ttest: 3.336<br>Pvalue: 0.003     |
| MARS          | 1 |                                                                                                                                                                            |
|               |   | Study: Chen_Liver Experiment Type: mRNA<br>Analysis: Liver Type Class 1: Nontumor Liver (76)<br>Class 2: Hepatocellular Carcinoma (104) Ttest:<br>3.234 Pvalue: 0.001      |
| TARDBP        | 2 |                                                                                                                                                                            |
|               |   | Study: Chen_Liver Experiment Type: mRNA<br>Analysis: Liver Type Class 1: Nontumor Liver (76)<br>Class 2: Hepatocellular Carcinoma (104) Ttest:<br>4.049 Pvalue: 7.7E5      |
|               |   | Study: Wurnbach_Liver Experiment Type: mRNA<br>Analysis: Liver Type Class 1: Normal Liver (10)<br>Class 2: Hepatocellular Carcinoma (35) Ttest: 2.747<br>Pvalue: 0.009     |
| SYNJ2         | 1 |                                                                                                                                                                            |
|               |   | Study: Wurnbach_Liver Experiment Type: mRNA<br>Analysis: Liver Type Class 1: Normal Liver (10)<br>Class 2: Hepatocellular Carcinoma (35) Ttest: 3.883<br>Pvalue: 7.7E4     |
| LRPPRC        | 1 |                                                                                                                                                                            |
|               |   | Study: Chen_Liver Experiment Type: mRNA<br>Analysis: Liver Type Class 1: Nontumor Liver (76)<br>Class 2: Hepatocellular Carcinoma (104) Ttest:<br>4.132 Pvalue: 5.8E5      |
| RBM10         | 2 |                                                                                                                                                                            |
|               |   | Study: Chen_Liver Experiment Type: mRNA<br>Analysis: Liver Type Class 1: Nontumor Liver (76)<br>Class 2: Hepatocellular Carcinoma (104) Ttest:<br>3.066 Pvalue: 0.003      |
|               |   | Study: Wurnbach_Liver Experiment Type: mRNA<br>Analysis: Liver Type Class 1: Normal Liver (10)<br>Class 2: Hepatocellular Carcinoma (35) Ttest: 3.087<br>Pvalue: 0.007     |
| AKAP1         | 1 |                                                                                                                                                                            |

|      |   |                                                                                                                                                                       |
|------|---|-----------------------------------------------------------------------------------------------------------------------------------------------------------------------|
|      |   | Study: Chen_Liver Experiment Type: mRNA<br>Analysis: Liver Type Class 1: Nontumor Liver (76)<br>Class 2: Hepatocellular Carcinoma (104) Ttest:<br>6.448 Pvalue: 1.1E9 |
| FXR1 | 3 |                                                                                                                                                                       |
|      |   | Study: Chen_Liver Experiment Type: mRNA<br>Analysis: Liver Type Class 1: Nontumor Liver (76)<br>Class 2: Hepatocellular Carcinoma (104) Ttest:<br>5.523 Pvalue: 1.2E7 |

Study: Wurmbach\_Liver Experiment Type: mRNA Analysis: Liver Type Class 1: Normal Liver (10) Class 2: Hepatocellular Carcinoma (35) Ttest: 3.651 Pvalue: 8.2E4  
Study: Chen\_Liver Experiment Type: mRNA Analysis: Liver Type Class 1: Benign Liver Disease (7) Class 2: Hepatocellular Carcinoma (104) Ttest: 3.655 Pvalue: 0.007

| Name   | # of Studies | Study Details                                                                                                                                                          |
|--------|--------------|------------------------------------------------------------------------------------------------------------------------------------------------------------------------|
| MRPS15 | 1            |                                                                                                                                                                        |
|        |              | Study: Chen_Liver Experiment Type: mRNA<br>Analysis: Liver Type Class 1: Nontumor Liver (76)<br>Class 2: Hepatocellular Carcinoma (104) Ttest:<br>3.886 Pvalue: 1.5E4  |
| PPIE   | 1            |                                                                                                                                                                        |
|        |              | Study: Wurmbach_Liver Experiment Type: mRNA<br>Analysis: Liver Type Class 1: Normal Liver (10)<br>Class 2: Hepatocellular Carcinoma (35) Ttest:<br>2.966 Pvalue: 0.005 |
| PAPOLA | 1            |                                                                                                                                                                        |
|        |              | Study: Wurmbach_Liver Experiment Type: mRNA<br>Analysis: Liver Type Class 1: Normal Liver (10)<br>Class 2: Hepatocellular Carcinoma (35) Ttest:<br>5.697 Pvalue: 6.3E6 |
| LARP4  | 3            |                                                                                                                                                                        |
|        |              | Study: Chen_Liver Experiment Type: mRNA<br>Analysis: Liver Type Class 1: Nontumor Liver (76)<br>Class 2: Hepatocellular Carcinoma (104) Ttest:<br>11.805 Pvalue: 4E24  |
|        |              | Study: Chen_Liver Experiment Type: mRNA<br>Analysis: Liver Type Class 1: Benign Liver Disease (7) Class 2: Hepatocellular Carcinoma (104) Ttest: 5.518 Pvalue: 6E4     |
|        |              | Study: Wurmbach_Liver Experiment Type: mRNA<br>Analysis: Liver Type Class 1: Normal Liver (10)<br>Class 2: Hepatocellular Carcinoma (35) Ttest:<br>2.987 Pvalue: 0.006 |
| IREB1  | 2            |                                                                                                                                                                        |

|        |   |                                                                                                                                                                        |
|--------|---|------------------------------------------------------------------------------------------------------------------------------------------------------------------------|
|        |   | Study: Chen_Liver Experiment Type: mRNA<br>Analysis: Liver Type Class 1: Nontumor Liver (76)<br>Class 2: Hepatocellular Carcinoma (104) Ttest:<br>5.367 Pvalue: 2.6E7  |
|        |   | Study: Wurmbach_Liver Experiment Type: mRNA<br>Analysis: Liver Type Class 1: Normal Liver (10)<br>Class 2: Hepatocellular Carcinoma (35) Ttest:<br>4.268 Pvalue: 5.5E4 |
| RBM35B | 2 |                                                                                                                                                                        |
|        |   | Study: Chen_Liver Experiment Type: mRNA<br>Analysis: Liver Type Class 1: Nontumor Liver (76)<br>Class 2: Hepatocellular Carcinoma (104) Ttest:<br>3.959 Pvalue: 1.1E4  |
|        |   | Study: Wurmbach_Liver Experiment Type: mRNA<br>Analysis: Liver Type Class 1: Normal Liver (10)<br>Class 2: Hepatocellular Carcinoma (35) Ttest: 3.18<br>Pvalue: 0.003  |

| Name  | # of Studies | Study Details                                                                                                                                                        |
|-------|--------------|----------------------------------------------------------------------------------------------------------------------------------------------------------------------|
| RPL18 | 4            |                                                                                                                                                                      |
|       |              | Study: Wachi_Lung Experiment Type: mRNA<br>Analysis: Lung Type Class 1: Normal Lung (5)<br>Class 2: Squamous Cell Lung Carcinoma (5) Ttest:<br>6.379 Pvalue: 4.5E4   |
|       |              | Study: Bhattacharjee_Lung Experiment Type:<br>mRNA Analysis: Lung Type Class 1: Normal<br>Lung (17) Class 2: Lung Adenocarcinoma (139)<br>Ttest: 3.229 Pvalue: 0.003 |
|       |              | Study: Stearman_Lung Experiment Type: mRNA<br>Analysis: Lung Type Class 1: Normal Lung (19)<br>Class 2: Lung Adenocarcinoma (20) Ttest: 3.258<br>Pvalue: 0.003       |
|       |              | Study: Bhattacharjee_Lung Experiment Type:<br>mRNA Analysis: Lung Type Class 1: Normal<br>Lung (17) Class 2: Carcinoid (20) Ttest:<br>2.79 Pvalue: 0.009             |
| RTCD1 | 5            |                                                                                                                                                                      |

|  |  |                                                                                                                                                             |
|--|--|-------------------------------------------------------------------------------------------------------------------------------------------------------------|
|  |  | Study: Bhattacharjee_Lung Experiment Type: mRNA Analysis: Lung Type Class 1: Normal Lung (17) Class 2: Carcinoid (20) Ttest: 5.237 Pvalue: 4.8E5            |
|  |  | Study: Bhattacharjee_Lung Experiment Type: mRNA Analysis: Lung Type Class 1: Normal Lung (17) Class 2: Lung Adenocarcinoma (139) Ttest: 4.124 Pvalue: 7.3E4 |

|       |   |                                                                                                                                                              |
|-------|---|--------------------------------------------------------------------------------------------------------------------------------------------------------------|
|       |   | Study: Bhattacharjee_Lung Experiment Type: mRNA Analysis: Lung Type Class 1: Normal Lung (17) Class 2: Small Cell Lung Cancer (6) Ttest: 3.932 Pvalue: 8.4E4 |
|       |   | Study: Powell_Lung Experiment Type: mRNA Analysis: Lung Type Class 1: NonMalignant Lung (11) Class 2: Lung Adenocarcinoma (11) Ttest: 3.462 Pvalue: 0.006    |
|       |   | Study: Garber_Lung Experiment Type: mRNA Analysis: Lung Type Class 1: Normal Lung (6) Class 2: Large Cell Lung Cancer (4) Ttest: 4.408 Pvalue: 0.01          |
| PABP4 | 2 |                                                                                                                                                              |
|       |   | Study: Bhattacharjee_Lung Experiment Type: mRNA Analysis: Lung Type Class 1: Normal Lung (17) Class 2: Lung Adenocarcinoma (139) Ttest: 7.14 Pvalue: 4.7E8   |
|       |   | Study: Su_Lung Experiment Type: mRNA Analysis: Lung Type Class 1: Normal Lung (31) Class 2: Lung Adenocarcinoma (31) Ttest: 2.813 Pvalue: 0.007              |
| PSMA1 | 5 |                                                                                                                                                              |
|       |   | Study: Bhattacharjee_Lung Experiment Type: mRNA Analysis: Lung Type Class 1: Normal Lung (17) Class 2: Lung Adenocarcinoma (139) Ttest: 5.168 Pvalue: 4.5E5  |

|        |   |                                                                                                                                                                     |
|--------|---|---------------------------------------------------------------------------------------------------------------------------------------------------------------------|
|        |   | Study: Bhattacharjee_Lung Experiment Type: mRNA Analysis: Lung Type Class 1: Normal Lung (17) Class 2: Small Cell Lung Cancer (6) Ttest: 4.306 Pvalue: 6.7E4        |
|        |   | Study: Bhattacharjee_Lung Experiment Type: mRNA Analysis: Lung Type Class 1: Normal Lung (17) Class 2: Squamous Cell Lung Carcinoma (21) Ttest: 3.482 Pvalue: 0.002 |
|        |   | Study: Garber_Lung Experiment Type: mRNA Analysis: Lung Type Class 1: Normal Lung (6) Class 2: Lung Adenocarcinoma (40) Ttest: 3.51 Pvalue: 0.006                   |
|        |   | Study: Su_Lung Experiment Type: mRNA Analysis: Lung Type Class 1: Normal Lung (31) Class 2: Lung Adenocarcinoma (31) Ttest: 2.753 Pvalue: 0.008                     |
| MRPL23 | 3 |                                                                                                                                                                     |
|        |   | Study: Bhattacharjee_Lung Experiment Type: mRNA Analysis: Lung Type Class 1: Normal Lung (17) Class 2: Lung Adenocarcinoma (139) Ttest: 5.237 Pvalue: 1.2E5         |
|        |   | Study: Bhattacharjee_Lung Experiment Type: mRNA Analysis: Lung Type Class 1: Normal Lung (17) Class 2: Carcinoid (20) Ttest: 4.013 Pvalue: 3.3E4                    |

|       |   |                                                                                                                                                             |
|-------|---|-------------------------------------------------------------------------------------------------------------------------------------------------------------|
|       |   | Study: Stearman_Lung Experiment Type: mRNA Analysis: Lung Type Class 1: Normal Lung (19) Class 2: Lung Adenocarcinoma (20) Ttest: 3.615 Pvalue: 0.001       |
| CNOT4 | 2 |                                                                                                                                                             |
|       |   | Study: Bhattacharjee_Lung Experiment Type: mRNA Analysis: Lung Type Class 1: Normal Lung (17) Class 2: Carcinoid (20) Ttest: 6.328 Pvalue: 3E7              |
|       |   | Study: Bhattacharjee_Lung Experiment Type: mRNA Analysis: Lung Type Class 1: Normal Lung (17) Class 2: Lung Adenocarcinoma (139) Ttest: 4.196 Pvalue: 2.9E4 |
| CSTF2 | 3 |                                                                                                                                                             |
|       |   | Study: Su_Lung Experiment Type: mRNA Analysis: Lung Type Class 1: Normal Lung (31) Class 2: Lung Adenocarcinoma (31) Ttest: 4.666 Pvalue: 2.4E5             |
|       |   | Study: Wachi_Lung Experiment Type: mRNA Analysis: Lung Type Class 1: Normal Lung (5) Class 2: Squamous Cell Lung Carcinoma (5) Ttest: 4.556 Pvalue: 0.003   |
|       |   | Study: Stearman_Lung Experiment Type: mRNA Analysis: Lung Type Class 1: Normal Lung (19) Class 2: Lung Adenocarcinoma (20) Ttest: 2.946 Pvalue: 0.006       |

|       |   |                                                                                                                                                              |
|-------|---|--------------------------------------------------------------------------------------------------------------------------------------------------------------|
| PTBP1 | 5 |                                                                                                                                                              |
|       |   | Study: Stearman_Lung Experiment Type: mRNA Analysis: Lung Type Class 1: Normal Lung (19) Class 2: Lung Adenocarcinoma (20) Ttest: 6.157 Pvalue: 1.6E6        |
|       |   | Study: Bhattacharjee_Lung Experiment Type: mRNA Analysis: Lung Type Class 1: Normal Lung (17) Class 2: Lung Adenocarcinoma (139) Ttest: 4.031 Pvalue: 3.6E4  |
|       |   | Study: Wachi_Lung Experiment Type: mRNA Analysis: Lung Type Class 1: Normal Lung (5) Class 2: Squamous Cell Lung Carcinoma (5) Ttest: 4.573 Pvalue: 0.002    |
|       |   | Study: Su_Lung Experiment Type: mRNA Analysis: Lung Type Class 1: Normal Lung (31) Class 2: Lung Adenocarcinoma (31) Ttest: 2.9 Pvalue: 0.005                |
|       |   | Study: Garber_Lung Experiment Type: mRNA Analysis: Lung Type Class 1: Normal Lung (6) Class 2: Small Cell Lung Cancer (4) Ttest: 3.505 Pvalue: 0.01          |
| RBM14 | 2 |                                                                                                                                                              |
|       |   | Study: Bhattacharjee_Lung Experiment Type: mRNA Analysis: Lung Type Class 1: Normal Lung (17) Class 2: Carcinoid (20) Ttest: 5.204 Pvalue: 1.1E5             |
|       |   | Study: Bhattacharjee_Lung Experiment Type: mRNA Analysis: Lung Type Class 1: Normal Lung (17) Class 2: Small Cell Lung Cancer (6) Ttest: 3.979 Pvalue: 0.002 |
| SYNJ2 | 9 |                                                                                                                                                              |
|       |   | Study: Stearman_Lung Experiment Type: mRNA Analysis: Lung Type Class 1: Normal Lung (19) Class 2: Lung Adenocarcinoma (20) Ttest: 5.125 Pvalue: 1E5          |
|       |   | Study: Bhattacharjee_Lung Experiment Type: mRNA Analysis: Lung Type Class 1: Normal Lung (17) Class 2: Carcinoid (20) Ttest: 5.45 Pvalue: 4.9E5              |
|       |   | Study: Garber_Lung Experiment Type: mRNA Analysis: Lung Type Class 1: Normal Lung (6) Class 2: Lung Adenocarcinoma (40) Ttest: 5.631 Pvalue: 5.8E5           |
|       |   | Study: Su_Lung Experiment Type: mRNA Analysis: Lung Type Class 1: Normal Lung (31) Class 2: Lung Adenocarcinoma (31) Ttest: 3.84 Pvalue: 3.5E4               |
|       |   | Study: Bhattacharjee_Lung Experiment Type: mRNA Analysis: Lung Type Class 1: Normal Lung (17) Class 2: Small Cell Lung Cancer (6) Ttest: 4.433 Pvalue: 3.6E4 |
|       |   | Study: Garber_Lung Experiment Type: mRNA Analysis: Lung Type Class 1: Normal Lung (6) Class 2: Small Cell Lung Cancer (4) Ttest: 6.412 Pvalue: 6.2E4         |
|       |   | Study: Wachi_Lung Experiment Type: mRNA Analysis: Lung Type Class 1: Normal Lung (5) Class 2: Squamous Cell Lung Carcinoma (5) Ttest: 4.597 Pvalue: 0.002    |
|       |   | Study: Bhattacharjee_Lung Experiment Type: mRNA Analysis: Lung Type Class 1: Normal Lung (17) Class 2: Lung Adenocarcinoma (139) Ttest: 3.565 Pvalue: 0.003  |
|       |   | Study: Garber_Lung Experiment Type: mRNA Analysis: Lung Type Class 1: Normal Lung (6) Class 2: Squamous Cell Lung Carcinoma (13) Ttest: 3.007 Pvalue: 0.008  |
| TRBP2 | 4 |                                                                                                                                                              |
|       |   | Study: Beer_Lung Experiment Type: mRNA Analysis: Lung Type Class 1: Normal Lung (10) Class 2: Lung Adenocarcinoma (86) Ttest: 5.183 Pvalue: 2E4              |
|       |   | Study: Stearman_Lung Experiment Type: mRNA Analysis: Lung Type Class 1: Normal Lung (19) Class 2: Lung Adenocarcinoma (20) Ttest: 3.52 Pvalue: 0.001         |
|       |   | Study: Garber_Lung Experiment Type: mRNA Analysis: Lung Type Class 1: Normal Lung (6) Class 2: Lung Adenocarcinoma (40) Ttest: 4.306 Pvalue: 0.002           |
|       |   | Study: Wachi_Lung Experiment Type: mRNA Analysis: Lung Type Class 1: Normal Lung (5) Class 2: Squamous Cell Lung Carcinoma (5) Ttest: 3.942 Pvalue: 0.009    |
| RBM34 | 8 |                                                                                                                                                              |

|  |  |                                                                                                                                                               |
|--|--|---------------------------------------------------------------------------------------------------------------------------------------------------------------|
|  |  | Study: Yamagata_Lung Experiment Type: mRNA Analysis: Lung Type Class 1: Normal Lung (3) Class 2: Squamous Cell Lung Carcinoma (11) Ttest: 7.044 Pvalue: 1.6E5 |
|  |  | Study: Bhattacharjee_Lung Experiment Type: mRNA Analysis: Lung Type Class 1: Normal Lung (17) Class 2: Lung Adenocarcinoma (139) Ttest: 4.824 Pvalue: 1.8E4   |
|  |  | Study: Bhattacharjee_Lung Experiment Type: mRNA Analysis: Lung Type Class 1: Normal Lung (17) Class 2: Small Cell Lung Cancer (6) Ttest: 4.118 Pvalue: 5.5E4  |
|  |  | Study: Bhattacharjee_Lung Experiment Type: mRNA Analysis: Lung Type Class 1: Normal Lung (17) Class 2: Carcinoid (20) Ttest: 3.798 Pvalue: 0.001              |

|       |   |                                                                                                                                                                     |
|-------|---|---------------------------------------------------------------------------------------------------------------------------------------------------------------------|
|       |   | Study: Garber_Lung Experiment Type: mRNA Analysis: Lung Type Class 1: Normal Lung (6) Class 2: Lung Adenocarcinoma (40) Ttest: 4.797 Pvalue: 0.001                  |
|       |   | Study: Bhattacharjee_Lung Experiment Type: mRNA Analysis: Lung Type Class 1: Normal Lung (17) Class 2: Squamous Cell Lung Carcinoma (21) Ttest: 3.524 Pvalue: 0.002 |
|       |   | Study: Garber_Lung Experiment Type: mRNA Analysis: Lung Type Class 1: Normal Lung (6) Class 2: Squamous Cell Lung Carcinoma (13) Ttest: 3.348 Pvalue: 0.004         |
|       |   | Study: Su_Lung Experiment Type: mRNA Analysis: Lung Type Class 1: Normal Lung (31) Class 2: Lung Adenocarcinoma (31) Ttest: 2.75 Pvalue: 0.008                      |
| SFRS1 | 6 |                                                                                                                                                                     |
|       |   | Study: Bhattacharjee_Lung Experiment Type: mRNA Analysis: Lung Type Class 1: Normal Lung (17) Class 2: Carcinoid (20) Ttest: 5.219 Pvalue: 1.8E5                    |
|       |   | Study: Bhattacharjee_Lung Experiment Type: mRNA Analysis: Lung Type Class 1: Normal Lung (17) Class 2: Lung Adenocarcinoma (139) Ttest: 5.304 Pvalue: 2.8E5         |

|       |   |                                                                                                                                                              |
|-------|---|--------------------------------------------------------------------------------------------------------------------------------------------------------------|
|       |   | Study: Bhattacharjee_Lung Experiment Type: mRNA Analysis: Lung Type Class 1: Normal Lung (17) Class 2: Small Cell Lung Cancer (6) Ttest: 5.765 Pvalue: 2.9E5 |
|       |   | Study: Garber_Lung Experiment Type: mRNA Analysis: Lung Type Class 1: Normal Lung (6) Class 2: Small Cell Lung Cancer (4) Ttest: 4.92 Pvalue: 0.002          |
|       |   | Study: Garber_Lung Experiment Type: mRNA Analysis: Lung Type Class 1: Normal Lung (6) Class 2: Lung Adenocarcinoma (40) Ttest: 3.957 Pvalue: 0.003           |
|       |   | Study: Garber_Lung Experiment Type: mRNA Analysis: Lung Type Class 1: Normal Lung (6) Class 2: Squamous Cell Lung Carcinoma (13) Ttest: 2.981 Pvalue: 0.009  |
| SART3 | 7 |                                                                                                                                                              |
|       |   | Study: Bhattacharjee_Lung Experiment Type: mRNA Analysis: Lung Type Class 1: Normal Lung (17) Class 2: Carcinoid (20) Ttest: 7.1 Pvalue: 3.5E8               |
|       |   | Study: Garber_Lung Experiment Type: mRNA Analysis: Lung Type Class 1: Normal Lung (6) Class 2: Lung Adenocarcinoma (40) Ttest: 4.973 Pvalue: 8.9E5           |

|  |  |                                                                                                                                                              |
|--|--|--------------------------------------------------------------------------------------------------------------------------------------------------------------|
|  |  | Study: Bhattacharjee_Lung Experiment Type: mRNA Analysis: Lung Type Class 1: Normal Lung (17) Class 2: Lung Adenocarcinoma (139) Ttest: 3.936 Pvalue: 7.7E4  |
|  |  | Study: Bhattacharjee_Lung Experiment Type: mRNA Analysis: Lung Type Class 1: Normal Lung (17) Class 2: Small Cell Lung Cancer (6) Ttest: 4.431 Pvalue: 0.003 |
|  |  | Study: Garber_Lung Experiment Type: mRNA Analysis: Lung Type Class 1: Normal Lung (6) Class 2: Squamous Cell Lung Carcinoma (13) Ttest: 3.339 Pvalue: 0.004  |
|  |  | Study: Stearman_Lung Experiment Type: mRNA Analysis: Lung Type Class 1: Normal Lung (19) Class 2: Lung Adenocarcinoma (20) Ttest: 2.944 Pvalue: 0.006        |

|      |   |                                                                                                                                                                    |
|------|---|--------------------------------------------------------------------------------------------------------------------------------------------------------------------|
|      |   | Study: Bhattacharjee_Lung Experiment Type: mRNA Analysis: Lung Type Class 1: Normal Lung (17) Class 2: Squamous Cell Lung Carcinoma (21) Ttest: 2.81 Pvalue: 0.009 |
| DKC1 | 9 |                                                                                                                                                                    |
|      |   | Study: Stearman_Lung Experiment Type: mRNA Analysis: Lung Type Class 1: Normal Lung (19) Class 2: Lung Adenocarcinoma (20) Ttest: 7.492 Pvalue: 1.4E7              |

|  |  |                                                                                                                                                                     |
|--|--|---------------------------------------------------------------------------------------------------------------------------------------------------------------------|
|  |  | Study: Su_Lung Experiment Type: mRNA Analysis: Lung Type Class 1: Normal Lung (31) Class 2: Lung Adenocarcinoma (31) Ttest: 5.124 Pvalue: 4.3E6                     |
|  |  | Study: Bhattacharjee_Lung Experiment Type: mRNA Analysis: Lung Type Class 1: Normal Lung (17) Class 2: Lung Adenocarcinoma (139) Ttest: 5.669 Pvalue: 1E5           |
|  |  | Study: Bhattacharjee_Lung Experiment Type: mRNA Analysis: Lung Type Class 1: Normal Lung (17) Class 2: Carcinoid (20) Ttest: 3.802 Pvalue: 5.5E4                    |
|  |  | Study: Bhattacharjee_Lung Experiment Type: mRNA Analysis: Lung Type Class 1: Normal Lung (17) Class 2: Squamous Cell Lung Carcinoma (21) Ttest: 3.761 Pvalue: 6.3E4 |
|  |  | Study: Bhattacharjee_Lung Experiment Type: mRNA Analysis: Lung Type Class 1: Normal Lung (17) Class 2: Small Cell Lung Cancer (6) Ttest: 4.804 Pvalue: 8.9E4        |
|  |  | Study: Garber_Lung Experiment Type: mRNA Analysis: Lung Type Class 1: Normal Lung (6) Class 2: Squamous Cell Lung Carcinoma (13) Ttest: 3.997 Pvalue: 0.002         |
|  |  | Study: Garber_Lung Experiment Type: mRNA Analysis: Lung Type Class 1: Normal Lung (6) Class 2: Large Cell Lung Cancer (4) Ttest: 3.721 Pvalue: 0.006                |

|       |   |                                                                                                                                                              |
|-------|---|--------------------------------------------------------------------------------------------------------------------------------------------------------------|
|       |   | Study: Garber_Lung Experiment Type: mRNA Analysis: Lung Type Class 1: Normal Lung (6) Class 2: Lung Adenocarcinoma (40) Ttest: 3.209 Pvalue: 0.009           |
| TUT1  | 1 |                                                                                                                                                              |
|       |   | Study: Garber_Lung Experiment Type: mRNA Analysis: Lung Type Class 1: Normal Lung (6) Class 2: Lung Adenocarcinoma (40) Ttest: 3.798 Pvalue: 0.006           |
| RBM16 | 3 |                                                                                                                                                              |
|       |   | Study: Bhattacharjee_Lung Experiment Type: mRNA Analysis: Lung Type Class 1: Normal Lung (17) Class 2: Carcinoid (20) Ttest: 6.539 Pvalue: 1.3E6             |
|       |   | Study: Bhattacharjee_Lung Experiment Type: mRNA Analysis: Lung Type Class 1: Normal Lung (17) Class 2: Lung Adenocarcinoma (139) Ttest: 3.924 Pvalue: 9.1E4  |
|       |   | Study: Bhattacharjee_Lung Experiment Type: mRNA Analysis: Lung Type Class 1: Normal Lung (17) Class 2: Small Cell Lung Cancer (6) Ttest: 3.558 Pvalue: 0.005 |
| MARS  | 9 |                                                                                                                                                              |
|       |   | Study: Bhattacharjee_Lung Experiment Type: mRNA Analysis: Lung Type Class 1: Normal Lung (17) Class 2: Carcinoid (20) Ttest: 8.176 Pvalue: 3.5E9             |

|  |  |                                                                                                                                                              |
|--|--|--------------------------------------------------------------------------------------------------------------------------------------------------------------|
|  |  | Study: Bhattacharjee_Lung Experiment Type: mRNA Analysis: Lung Type Class 1: Normal Lung (17) Class 2: Lung Adenocarcinoma (139) Ttest: 6.646 Pvalue: 5.7E7  |
|  |  | Study: Beer_Lung Experiment Type: mRNA Analysis: Lung Type Class 1: Normal Lung (10) Class 2: Lung Adenocarcinoma (86) Ttest: 4.682 Pvalue: 1.7E5            |
|  |  | Study: Stearman_Lung Experiment Type: mRNA Analysis: Lung Type Class 1: Normal Lung (19) Class 2: Lung Adenocarcinoma (20) Ttest: 4.782 Pvalue: 3.2E5        |
|  |  | Study: Bhattacharjee_Lung Experiment Type: mRNA Analysis: Lung Type Class 1: Normal Lung (17) Class 2: Small Cell Lung Cancer (6) Ttest: 5.349 Pvalue: 2.8E4 |
|  |  | Study: Su_Lung Experiment Type: mRNA Analysis: Lung Type Class 1: Normal Lung (31) Class 2: Lung Adenocarcinoma (31) Ttest: 3.414 Pvalue: 0.001              |



|  |  |                                                                                                                                                                     |
|--|--|---------------------------------------------------------------------------------------------------------------------------------------------------------------------|
|  |  | Study: Bhattacharjee_Lung Experiment Type: mRNA Analysis: Lung Type Class 1: Normal Lung (17) Class 2: Squamous Cell Lung Carcinoma (21) Ttest: 3.276 Pvalue: 0.002 |
|  |  | Study: Powell_Lung Experiment Type: mRNA Analysis: Lung Type Class 1: NonMalignant Lung (11) Class 2: Lung Adenocarcinoma (11) Ttest: 3.26 Pvalue: 0.004            |

|       |   |                                                                                                                                                             |
|-------|---|-------------------------------------------------------------------------------------------------------------------------------------------------------------|
|       |   | Study: Wachi_Lung Experiment Type: mRNA Analysis: Lung Type Class 1: Normal Lung (5) Class 2: Squamous Cell Lung Carcinoma (5) Ttest: 4.845 Pvalue: 0.005   |
| RBM12 | 1 |                                                                                                                                                             |
|       |   | Study: Bhattacharjee_Lung Experiment Type: mRNA Analysis: Lung Type Class 1: Normal Lung (17) Class 2: Carcinoid (20) Ttest: 3.65 Pvalue: 0.005             |
| U2AF2 | 5 |                                                                                                                                                             |
|       |   | Study: Bhattacharjee_Lung Experiment Type: mRNA Analysis: Lung Type Class 1: Normal Lung (17) Class 2: Carcinoid (20) Ttest: 7.54 Pvalue: 2.1E8             |
|       |   | Study: Beer_Lung Experiment Type: mRNA Analysis: Lung Type Class 1: Normal Lung (10) Class 2: Lung Adenocarcinoma (86) Ttest: 7.066 Pvalue: 1.8E5           |
|       |   | Study: Bhattacharjee_Lung Experiment Type: mRNA Analysis: Lung Type Class 1: Normal Lung (17) Class 2: Small Cell Lung Cancer (6) Ttest: 6.33 Pvalue: 2.4E5 |
|       |   | Study: Bhattacharjee_Lung Experiment Type: mRNA Analysis: Lung Type Class 1: Normal Lung (17) Class 2: Lung Adenocarcinoma (139) Ttest: 4.245 Pvalue: 1.9E4 |

|       |   |                                                                                                                                                                     |
|-------|---|---------------------------------------------------------------------------------------------------------------------------------------------------------------------|
|       |   | Study: Su_Lung Experiment Type: mRNA Analysis: Lung Type Class 1: Normal Lung (31) Class 2: Lung Adenocarcinoma (31) Ttest: 2.944 Pvalue: 0.005                     |
| RENT1 | 2 |                                                                                                                                                                     |
|       |   | Study: Bhattacharjee_Lung Experiment Type: mRNA Analysis: Lung Type Class 1: Normal Lung (17) Class 2: Carcinoid (20) Ttest: 5.156 Pvalue: 2.6E5                    |
|       |   | Study: Bhattacharjee_Lung Experiment Type: mRNA Analysis: Lung Type Class 1: Normal Lung (17) Class 2: Small Cell Lung Cancer (6) Ttest: 4.086 Pvalue: 8.3E4        |
| RBM4  | 5 |                                                                                                                                                                     |
|       |   | Study: Bhattacharjee_Lung Experiment Type: mRNA Analysis: Lung Type Class 1: Normal Lung (17) Class 2: Carcinoid (20) Ttest: 6.033 Pvalue: 7.1E7                    |
|       |   | Study: Bhattacharjee_Lung Experiment Type: mRNA Analysis: Lung Type Class 1: Normal Lung (17) Class 2: Lung Adenocarcinoma (139) Ttest: 5.288 Pvalue: 1.8E5         |
|       |   | Study: Bhattacharjee_Lung Experiment Type: mRNA Analysis: Lung Type Class 1: Normal Lung (17) Class 2: Squamous Cell Lung Carcinoma (21) Ttest: 4.933 Pvalue: 1.9E5 |

|        |   |                                                                                                                                                              |
|--------|---|--------------------------------------------------------------------------------------------------------------------------------------------------------------|
|        |   | Study: Bhattacharjee_Lung Experiment Type: mRNA Analysis: Lung Type Class 1: Normal Lung (17) Class 2: Small Cell Lung Cancer (6) Ttest: 5.934 Pvalue: 3.1E4 |
|        |   | Study: Garber_Lung Experiment Type: mRNA Analysis: Lung Type Class 1: Normal Lung (6) Class 2: Lung Adenocarcinoma (40) Ttest: 4.368 Pvalue: 0.001           |
| DAZAP1 | 1 |                                                                                                                                                              |
|        |   | Study: Su_Lung Experiment Type: mRNA Analysis: Lung Type Class 1: Normal Lung (31) Class 2: Lung Adenocarcinoma (31) Ttest: 2.879 Pvalue: 0.006              |
| MRPL12 | 4 |                                                                                                                                                              |
|        |   | Study: Su_Lung Experiment Type: mRNA Analysis: Lung Type Class 1: Normal Lung (31) Class 2: Lung Adenocarcinoma (31) Ttest: 5.248 Pvalue: 2.7E6              |
|        |   | Study: Beer_Lung Experiment Type: mRNA Analysis: Lung Type Class 1: Normal Lung (10) Class 2: Lung Adenocarcinoma (86) Ttest: 4.891 Pvalue: 4.6E6            |

|  |  |                                                                                                                                                       |
|--|--|-------------------------------------------------------------------------------------------------------------------------------------------------------|
|  |  | Study: Stearman_Lung Experiment Type: mRNA Analysis: Lung Type Class 1: Normal Lung (19) Class 2: Lung Adenocarcinoma (20) Ttest: 5.477 Pvalue: 1.2E5 |
|--|--|-------------------------------------------------------------------------------------------------------------------------------------------------------|

|  |  |                                                                                                                                                          |
|--|--|----------------------------------------------------------------------------------------------------------------------------------------------------------|
|  |  | Study: Powell_Lung Experiment Type: mRNA Analysis: Lung Type Class 1: NonMalignant Lung (11) Class 2: Lung Adenocarcinoma (11) Ttest: 3.15 Pvalue: 0.005 |
|--|--|----------------------------------------------------------------------------------------------------------------------------------------------------------|

|         |   |                                                                                                                                                  |
|---------|---|--------------------------------------------------------------------------------------------------------------------------------------------------|
| SIAHBP1 | 6 |                                                                                                                                                  |
|         |   | Study: Bhattacharjee_Lung Experiment Type: mRNA Analysis: Lung Type Class 1: Normal Lung (17) Class 2: Carcinoid (20) Ttest: 5.903 Pvalue: 1.1E6 |

|  |  |                                                                                                                                                   |
|--|--|---------------------------------------------------------------------------------------------------------------------------------------------------|
|  |  | Study: Beer_Lung Experiment Type: mRNA Analysis: Lung Type Class 1: Normal Lung (10) Class 2: Lung Adenocarcinoma (86) Ttest: 5.083 Pvalue: 1.4E5 |
|--|--|---------------------------------------------------------------------------------------------------------------------------------------------------|

|  |  |                                                                                                                                                             |
|--|--|-------------------------------------------------------------------------------------------------------------------------------------------------------------|
|  |  | Study: Bhattacharjee_Lung Experiment Type: mRNA Analysis: Lung Type Class 1: Normal Lung (17) Class 2: Lung Adenocarcinoma (139) Ttest: 4.992 Pvalue: 2.3E5 |
|--|--|-------------------------------------------------------------------------------------------------------------------------------------------------------------|

|  |  |                                                                                                                                               |
|--|--|-----------------------------------------------------------------------------------------------------------------------------------------------|
|  |  | Study: Su_Lung Experiment Type: mRNA Analysis: Lung Type Class 1: Normal Lung (31) Class 2: Lung Adenocarcinoma (31) Ttest: 3.974 Pvalue: 2E4 |
|--|--|-----------------------------------------------------------------------------------------------------------------------------------------------|

|  |  |                                                                                                                                                    |
|--|--|----------------------------------------------------------------------------------------------------------------------------------------------------|
|  |  | Study: Garber_Lung Experiment Type: mRNA Analysis: Lung Type Class 1: Normal Lung (6) Class 2: Lung Adenocarcinoma (40) Ttest: 4.729 Pvalue: 2.1E4 |
|--|--|----------------------------------------------------------------------------------------------------------------------------------------------------|

|  |  |                                                                                                                                                           |
|--|--|-----------------------------------------------------------------------------------------------------------------------------------------------------------|
|  |  | Study: Wachi_Lung Experiment Type: mRNA Analysis: Lung Type Class 1: Normal Lung (5) Class 2: Squamous Cell Lung Carcinoma (5) Ttest: 3.861 Pvalue: 0.009 |
|--|--|-----------------------------------------------------------------------------------------------------------------------------------------------------------|

|       |   |                                                                                                                                                 |
|-------|---|-------------------------------------------------------------------------------------------------------------------------------------------------|
| AKAP1 | 7 |                                                                                                                                                 |
|       |   | Study: Su_Lung Experiment Type: mRNA Analysis: Lung Type Class 1: Normal Lung (31) Class 2: Lung Adenocarcinoma (31) Ttest: 3.933 Pvalue: 2.2E4 |

|  |  |                                                                                                                                                              |
|--|--|--------------------------------------------------------------------------------------------------------------------------------------------------------------|
|  |  | Study: Bhattacharjee_Lung Experiment Type: mRNA Analysis: Lung Type Class 1: Normal Lung (17) Class 2: Small Cell Lung Cancer (6) Ttest: 4.348 Pvalue: 4.7E4 |
|--|--|--------------------------------------------------------------------------------------------------------------------------------------------------------------|

|  |  |                                                                                                                                                  |
|--|--|--------------------------------------------------------------------------------------------------------------------------------------------------|
|  |  | Study: Bhattacharjee_Lung Experiment Type: mRNA Analysis: Lung Type Class 1: Normal Lung (17) Class 2: Carcinoid (20) Ttest: 4.021 Pvalue: 0.001 |
|--|--|--------------------------------------------------------------------------------------------------------------------------------------------------|

|  |  |                                                                                                                                                      |
|--|--|------------------------------------------------------------------------------------------------------------------------------------------------------|
|  |  | Study: Garber_Lung Experiment Type: mRNA Analysis: Lung Type Class 1: Normal Lung (6) Class 2: Small Cell Lung Cancer (4) Ttest: 5.152 Pvalue: 0.002 |
|--|--|------------------------------------------------------------------------------------------------------------------------------------------------------|

|  |  |                                                                                                                                                    |
|--|--|----------------------------------------------------------------------------------------------------------------------------------------------------|
|  |  | Study: Garber_Lung Experiment Type: mRNA Analysis: Lung Type Class 1: Normal Lung (6) Class 2: Lung Adenocarcinoma (40) Ttest: 3.366 Pvalue: 0.005 |
|--|--|----------------------------------------------------------------------------------------------------------------------------------------------------|

|  |  |                                                                                                                                                            |
|--|--|------------------------------------------------------------------------------------------------------------------------------------------------------------|
|  |  | Study: Bhattacharjee_Lung Experiment Type: mRNA Analysis: Lung Type Class 1: Normal Lung (17) Class 2: Lung Adenocarcinoma (139) Ttest: 3.29 Pvalue: 0.005 |
|--|--|------------------------------------------------------------------------------------------------------------------------------------------------------------|

|  |  |                                                                                                                                                       |
|--|--|-------------------------------------------------------------------------------------------------------------------------------------------------------|
|  |  | Study: Stearman_Lung Experiment Type: mRNA Analysis: Lung Type Class 1: Normal Lung (19) Class 2: Lung Adenocarcinoma (20) Ttest: 2.803 Pvalue: 0.008 |
|--|--|-------------------------------------------------------------------------------------------------------------------------------------------------------|

|       |   |                                                                                                                                                    |
|-------|---|----------------------------------------------------------------------------------------------------------------------------------------------------|
| CPSF6 | 5 |                                                                                                                                                    |
|       |   | Study: Garber_Lung Experiment Type: mRNA Analysis: Lung Type Class 1: Normal Lung (6) Class 2: Lung Adenocarcinoma (40) Ttest: 4.827 Pvalue: 7.7E4 |

|  |  |                                                                                                                                                           |
|--|--|-----------------------------------------------------------------------------------------------------------------------------------------------------------|
|  |  | Study: Wachi_Lung Experiment Type: mRNA Analysis: Lung Type Class 1: Normal Lung (5) Class 2: Squamous Cell Lung Carcinoma (5) Ttest: 5.028 Pvalue: 0.001 |
|--|--|-----------------------------------------------------------------------------------------------------------------------------------------------------------|

|  |  |                                                                                                                                                |
|--|--|------------------------------------------------------------------------------------------------------------------------------------------------|
|  |  | Study: Su_Lung Experiment Type: mRNA Analysis: Lung Type Class 1: Normal Lung (31) Class 2: Lung Adenocarcinoma (31) Ttest: 3.09 Pvalue: 0.003 |
|--|--|------------------------------------------------------------------------------------------------------------------------------------------------|

|  |  |                                                                                                                                                     |
|--|--|-----------------------------------------------------------------------------------------------------------------------------------------------------|
|  |  | Study: Garber_Lung Experiment Type: mRNA Analysis: Lung Type Class 1: Normal Lung (6) Class 2: Small Cell Lung Cancer (4) Ttest: 4.71 Pvalue: 0.004 |
|--|--|-----------------------------------------------------------------------------------------------------------------------------------------------------|

|  |  |                                                                                                                                                             |
|--|--|-------------------------------------------------------------------------------------------------------------------------------------------------------------|
|  |  | Study: Garber_Lung Experiment Type: mRNA Analysis: Lung Type Class 1: Normal Lung (6) Class 2: Squamous Cell Lung Carcinoma (13) Ttest: 3.291 Pvalue: 0.004 |
|--|--|-------------------------------------------------------------------------------------------------------------------------------------------------------------|

|    |   |  |
|----|---|--|
| LA | 5 |  |
|----|---|--|

|       |    |                                                                                                                                                                     |
|-------|----|---------------------------------------------------------------------------------------------------------------------------------------------------------------------|
|       |    | Study: Bhattacharjee_Lung Experiment Type: mRNA Analysis: Lung Type Class 1: Normal Lung (17) Class 2: Carcinoid (20) Ttest: 5.377 Pvalue: 8.2E6                    |
|       |    | Study: Bhattacharjee_Lung Experiment Type: mRNA Analysis: Lung Type Class 1: Normal Lung (17) Class 2: Lung Adenocarcinoma (139) Ttest: 5.235 Pvalue: 2.6E5         |
|       |    | Study: Garber_Lung Experiment Type: mRNA Analysis: Lung Type Class 1: Normal Lung (6) Class 2: Lung Adenocarcinoma (40) Ttest: 4.463 Pvalue: 1.6E4                  |
|       |    | Study: Garber_Lung Experiment Type: mRNA Analysis: Lung Type Class 1: Normal Lung (6) Class 2: Squamous Cell Lung Carcinoma (13) Ttest: 3.788 Pvalue: 0.002         |
|       |    | Study: Bhattacharjee_Lung Experiment Type: mRNA Analysis: Lung Type Class 1: Normal Lung (17) Class 2: Squamous Cell Lung Carcinoma (21) Ttest: 2.956 Pvalue: 0.006 |
| NCBP2 | 10 |                                                                                                                                                                     |

|  |  |                                                                                                                                                                     |
|--|--|---------------------------------------------------------------------------------------------------------------------------------------------------------------------|
|  |  | Study: Bhattacharjee_Lung Experiment Type: mRNA Analysis: Lung Type Class 1: Normal Lung (17) Class 2: Squamous Cell Lung Carcinoma (21) Ttest: 6.508 Pvalue: 1.9E6 |
|  |  | Study: Garber_Lung Experiment Type: mRNA Analysis: Lung Type Class 1: Normal Lung (6) Class 2: Squamous Cell Lung Carcinoma (13) Ttest: 5.589 Pvalue: 4.2E5         |
|  |  | Study: Bhattacharjee_Lung Experiment Type: mRNA Analysis: Lung Type Class 1: Normal Lung (17) Class 2: Lung Adenocarcinoma (139) Ttest: 5.489 Pvalue: 6.1E5         |
|  |  | Study: Bhattacharjee_Lung Experiment Type: mRNA Analysis: Lung Type Class 1: Normal Lung (17) Class 2: Small Cell Lung Cancer (6) Ttest: 5.314 Pvalue: 6.6E5        |
|  |  | Study: Bhattacharjee_Lung Experiment Type: mRNA Analysis: Lung Type Class 1: Normal Lung (17) Class 2: Carcinoid (20) Ttest: 4.65 Pvalue: 8.3E5                     |
|  |  | Study: Yamagata_Lung Experiment Type: mRNA Analysis: Lung Type Class 1: Normal Lung (3) Class 2: Squamous Cell Lung Carcinoma (11) Ttest: 3.553 Pvalue: 0.004       |
|  |  | Study: Su_Lung Experiment Type: mRNA Analysis: Lung Type Class 1: Normal Lung (31) Class 2: Lung Adenocarcinoma (31) Ttest: 2.993 Pvalue: 0.004                     |

|        |   |                                                                                                                                                             |
|--------|---|-------------------------------------------------------------------------------------------------------------------------------------------------------------|
|        |   | Study: Garber_Lung Experiment Type: mRNA Analysis: Lung Type Class 1: Normal Lung (6) Class 2: Lung Adenocarcinoma (40) Ttest: 3.683 Pvalue: 0.004          |
|        |   | Study: Wachi_Lung Experiment Type: mRNA Analysis: Lung Type Class 1: Normal Lung (5) Class 2: Squamous Cell Lung Carcinoma (5) Ttest: 4.563 Pvalue: 0.008   |
|        |   | Study: Beer_Lung Experiment Type: mRNA Analysis: Lung Type Class 1: Normal Lung (10) Class 2: Lung Adenocarcinoma (86) Ttest: 2.942 Pvalue: 0.009           |
| DSRAD  | 3 |                                                                                                                                                             |
|        |   | Study: Garber_Lung Experiment Type: mRNA Analysis: Lung Type Class 1: Normal Lung (6) Class 2: Lung Adenocarcinoma (40) Ttest: 5.976 Pvalue: 3E5            |
|        |   | Study: Beer_Lung Experiment Type: mRNA Analysis: Lung Type Class 1: Normal Lung (10) Class 2: Lung Adenocarcinoma (86) Ttest: 3.752 Pvalue: 7.5E4           |
|        |   | Study: Bhattacharjee_Lung Experiment Type: mRNA Analysis: Lung Type Class 1: Normal Lung (17) Class 2: Lung Adenocarcinoma (139) Ttest: 3.088 Pvalue: 0.005 |
| EIF3S4 | 1 |                                                                                                                                                             |

|      |   |                                                                                                                                                            |
|------|---|------------------------------------------------------------------------------------------------------------------------------------------------------------|
|      |   | Study: Bhattacharjee_Lung Experiment Type: mRNA Analysis: Lung Type Class 1: Normal Lung (17) Class 2: Lung Adenocarcinoma (139) Ttest: 3.27 Pvalue: 0.003 |
| GARS | 8 |                                                                                                                                                            |
|      |   | Study: Beer_Lung Experiment Type: mRNA Analysis: Lung Type Class 1: Normal Lung (10) Class 2: Lung Adenocarcinoma (86) Ttest: 8.578 Pvalue: 5.5E10         |

|  |  |                                                                                                                                                             |
|--|--|-------------------------------------------------------------------------------------------------------------------------------------------------------------|
|  |  | Study: Bhattacharjee_Lung Experiment Type: mRNA Analysis: Lung Type Class 1: Normal Lung (17) Class 2: Lung Adenocarcinoma (139) Ttest: 7.415 Pvalue: 7.9E8 |
|  |  | Study: Bhattacharjee_Lung Experiment Type: mRNA Analysis: Lung Type Class 1: Normal Lung (17) Class 2: Carcinoid (20) Ttest: 6.521 Pvalue: 2.3E7            |
|  |  | Study: Stearman_Lung Experiment Type: mRNA Analysis: Lung Type Class 1: Normal Lung (19) Class 2: Lung Adenocarcinoma (20) Ttest: 6.767 Pvalue: 2.5E7       |
|  |  | Study: Su_Lung Experiment Type: mRNA Analysis: Lung Type Class 1: Normal Lung (31) Class 2: Lung Adenocarcinoma (31) Ttest: 5.262 Pvalue: 2.4E6             |

|       |   |                                                                                                                                                                     |
|-------|---|---------------------------------------------------------------------------------------------------------------------------------------------------------------------|
|       |   | Study: Bhattacharjee_Lung Experiment Type: mRNA Analysis: Lung Type Class 1: Normal Lung (17) Class 2: Squamous Cell Lung Carcinoma (21) Ttest: 4.517 Pvalue: 6.6E5 |
|       |   | Study: Powell_Lung Experiment Type: mRNA Analysis: Lung Type Class 1: NonMalignant Lung (11) Class 2: Lung Adenocarcinoma (11) Ttest: 3.469 Pvalue: 0.003           |
|       |   | Study: Bhattacharjee_Lung Experiment Type: mRNA Analysis: Lung Type Class 1: Normal Lung (17) Class 2: Small Cell Lung Cancer (6) Ttest: 4.063 Pvalue: 0.003        |
| FUBP1 | 6 |                                                                                                                                                                     |
|       |   | Study: Bhattacharjee_Lung Experiment Type: mRNA Analysis: Lung Type Class 1: Normal Lung (17) Class 2: Carcinoid (20) Ttest: 7.214 Pvalue: 1.4E7                    |
|       |   | Study: Stearman_Lung Experiment Type: mRNA Analysis: Lung Type Class 1: Normal Lung (19) Class 2: Lung Adenocarcinoma (20) Ttest: 5.456 Pvalue: 9.8E6               |
|       |   | Study: Bhattacharjee_Lung Experiment Type: mRNA Analysis: Lung Type Class 1: Normal Lung (17) Class 2: Lung Adenocarcinoma (139) Ttest: 4.26 Pvalue: 3.1E4          |

|     |   |                                                                                                                                                                     |
|-----|---|---------------------------------------------------------------------------------------------------------------------------------------------------------------------|
|     |   | Study: Bhattacharjee_Lung Experiment Type: mRNA Analysis: Lung Type Class 1: Normal Lung (17) Class 2: Small Cell Lung Cancer (6) Ttest: 4.689 Pvalue: 3.1E4        |
|     |   | Study: Beer_Lung Experiment Type: mRNA Analysis: Lung Type Class 1: Normal Lung (10) Class 2: Lung Adenocarcinoma (86) Ttest: 4.462 Pvalue: 4.1E4                   |
|     |   | Study: Garber_Lung Experiment Type: mRNA Analysis: Lung Type Class 1: Normal Lung (6) Class 2: Lung Adenocarcinoma (40) Ttest: 3.737 Pvalue: 0.007                  |
| FBL | 4 |                                                                                                                                                                     |
|     |   | Study: Bhattacharjee_Lung Experiment Type: mRNA Analysis: Lung Type Class 1: Normal Lung (17) Class 2: Lung Adenocarcinoma (139) Ttest: 7.149 Pvalue: 9.9E9         |
|     |   | Study: Bhattacharjee_Lung Experiment Type: mRNA Analysis: Lung Type Class 1: Normal Lung (17) Class 2: Squamous Cell Lung Carcinoma (21) Ttest: 5.525 Pvalue: 4.8E6 |
|     |   | Study: Bhattacharjee_Lung Experiment Type: mRNA Analysis: Lung Type Class 1: Normal Lung (17) Class 2: Carcinoid (20) Ttest: 5.117 Pvalue: 1.4E5                    |

|       |   |                                                                                                                                                             |
|-------|---|-------------------------------------------------------------------------------------------------------------------------------------------------------------|
|       |   | Study: Stearman_Lung Experiment Type: mRNA Analysis: Lung Type Class 1: Normal Lung (19) Class 2: Lung Adenocarcinoma (20) Ttest: 3.948 Pvalue: 5.9E4       |
| FUBP2 | 4 |                                                                                                                                                             |
|       |   | Study: Bhattacharjee_Lung Experiment Type: mRNA Analysis: Lung Type Class 1: Normal Lung (17) Class 2: Carcinoid (20) Ttest: 4.107 Pvalue: 2.4E4            |
|       |   | Study: Bhattacharjee_Lung Experiment Type: mRNA Analysis: Lung Type Class 1: Normal Lung (17) Class 2: Lung Adenocarcinoma (139) Ttest: 3.811 Pvalue: 6.9E4 |
|       |   | Study: Garber_Lung Experiment Type: mRNA Analysis: Lung Type Class 1: Normal Lung (6) Class 2: Small Cell Lung Cancer (4) Ttest: 4.837 Pvalue: 0.003        |

|       |   |                                                                                                                                                              |
|-------|---|--------------------------------------------------------------------------------------------------------------------------------------------------------------|
|       |   | Study: Bhattacharjee_Lung Experiment Type: mRNA Analysis: Lung Type Class 1: Normal Lung (17) Class 2: Small Cell Lung Cancer (6) Ttest: 4.576 Pvalue: 0.004 |
| HTF9C | 2 |                                                                                                                                                              |
|       |   | Study: Su_Lung Experiment Type: mRNA Analysis: Lung Type Class 1: Normal Lung (31) Class 2: Lung Adenocarcinoma (31) Ttest: 3.346 Pvalue: 0.001              |

|       |   |                                                                                                                                                             |
|-------|---|-------------------------------------------------------------------------------------------------------------------------------------------------------------|
|       |   | Study: Garber_Lung Experiment Type: mRNA Analysis: Lung Type Class 1: Normal Lung (6) Class 2: Large Cell Lung Cancer (4) Ttest: 4.436 Pvalue: 0.007        |
| FUS   | 5 |                                                                                                                                                             |
|       |   | Study: Bhattacharjee_Lung Experiment Type: mRNA Analysis: Lung Type Class 1: Normal Lung (17) Class 2: Carcinoid (20) Ttest: 5.543 Pvalue: 3.3E6            |
|       |   | Study: Stearman_Lung Experiment Type: mRNA Analysis: Lung Type Class 1: Normal Lung (19) Class 2: Lung Adenocarcinoma (20) Ttest: 4.279 Pvalue: 1.6E4       |
|       |   | Study: Bhattacharjee_Lung Experiment Type: mRNA Analysis: Lung Type Class 1: Normal Lung (17) Class 2: Lung Adenocarcinoma (139) Ttest: 4.244 Pvalue: 1.9E4 |
|       |   | Study: Su_Lung Experiment Type: mRNA Analysis: Lung Type Class 1: Normal Lung (31) Class 2: Lung Adenocarcinoma (31) Ttest: 3.302 Pvalue: 0.002             |
|       |   | Study: Beer_Lung Experiment Type: mRNA Analysis: Lung Type Class 1: Normal Lung (10) Class 2: Lung Adenocarcinoma (86) Ttest: 3.705 Pvalue: 0.002           |
| GRSF1 | 4 |                                                                                                                                                             |

|       |   |                                                                                                                                                               |
|-------|---|---------------------------------------------------------------------------------------------------------------------------------------------------------------|
|       |   | Study: Bhattacharjee_Lung Experiment Type: mRNA Analysis: Lung Type Class 1: Normal Lung (17) Class 2: Carcinoid (20) Ttest: 5.413 Pvalue: 1.7E5              |
|       |   | Study: Bhattacharjee_Lung Experiment Type: mRNA Analysis: Lung Type Class 1: Normal Lung (17) Class 2: Lung Adenocarcinoma (139) Ttest: 3.445 Pvalue: 0.003   |
|       |   | Study: Bhattacharjee_Lung Experiment Type: mRNA Analysis: Lung Type Class 1: Normal Lung (17) Class 2: Small Cell Lung Cancer (6) Ttest: 3.365 Pvalue: 0.003  |
|       |   | Study: Wachi_Lung Experiment Type: mRNA Analysis: Lung Type Class 1: Normal Lung (5) Class 2: Squamous Cell Lung Carcinoma (5) Ttest: 3.553 Pvalue: 0.009     |
| STRBP | 2 |                                                                                                                                                               |
|       |   | Study: Yamagata_Lung Experiment Type: mRNA Analysis: Lung Type Class 1: Normal Lung (3) Class 2: Squamous Cell Lung Carcinoma (11) Ttest: 4.867 Pvalue: 3.9E4 |
|       |   | Study: Yamagata_Lung Experiment Type: mRNA Analysis: Lung Type Class 1: Normal Lung (3) Class 2: Lung Adenocarcinoma (9) Ttest: 3.806 Pvalue: 0.003           |
| PPIE  | 5 |                                                                                                                                                               |

|         |   |                                                                                                                                                              |
|---------|---|--------------------------------------------------------------------------------------------------------------------------------------------------------------|
|         |   | Study: Bhattacharjee_Lung Experiment Type: mRNA Analysis: Lung Type Class 1: Normal Lung (17) Class 2: Carcinoid (20) Ttest: 5.245 Pvalue: 1.4E5             |
|         |   | Study: Su_Lung Experiment Type: mRNA Analysis: Lung Type Class 1: Normal Lung (31) Class 2: Lung Adenocarcinoma (31) Ttest: 4.724 Pvalue: 1.5E5              |
|         |   | Study: Bhattacharjee_Lung Experiment Type: mRNA Analysis: Lung Type Class 1: Normal Lung (17) Class 2: Small Cell Lung Cancer (6) Ttest: 3.897 Pvalue: 0.001 |
|         |   | Study: Bhattacharjee_Lung Experiment Type: mRNA Analysis: Lung Type Class 1: Normal Lung (17) Class 2: Lung Adenocarcinoma (139) Ttest: 3.627 Pvalue: 0.002  |
|         |   | Study: Wachi_Lung Experiment Type: mRNA Analysis: Lung Type Class 1: Normal Lung (5) Class 2: Squamous Cell Lung Carcinoma (5) Ttest: 4.763 Pvalue: 0.006    |
| ANKRD17 | 3 |                                                                                                                                                              |

|  |  |                                                                                                                                                  |
|--|--|--------------------------------------------------------------------------------------------------------------------------------------------------|
|  |  | Study: Bhattacharjee_Lung Experiment Type: mRNA Analysis: Lung Type Class 1: Normal Lung (17) Class 2: Carcinoid (20) Ttest: 7.269 Pvalue: 4.3E7 |
|--|--|--------------------------------------------------------------------------------------------------------------------------------------------------|

Study: Bhattacharjee\_Lung Experiment Type: mRNA Analysis: Lung Type Class 1: Normal Lung (17) Class 2: Lung Adenocarcinoma (139) Ttest: 3.99 Pvalue: 9.2E4 Study: Bhattacharjee\_Lung Experiment Type: mRNA Analysis: Lung Type Class 1: Normal Lung (17) Class 2: Small Cell Lung Cancer (6) Ttest: 3.231 Pvalue: 0.007

| Name     | # of Studies | Study Details                                                                                                                                                 |
|----------|--------------|---------------------------------------------------------------------------------------------------------------------------------------------------------------|
| PAPOLG   | 1            |                                                                                                                                                               |
|          |              | Study: Su_Lung Experiment Type: mRNA Analysis: Lung Type Class 1: Normal Lung (31) Class 2: Lung Adenocarcinoma (31) Ttest: 3.225 Pvalue: 0.002               |
| CDKN2AIP | 1            |                                                                                                                                                               |
|          |              | Study: Yamagata_Lung Experiment Type: mRNA Analysis: Lung Type Class 1: Normal Lung (3) Class 2: Squamous Cell Lung Carcinoma (11) Ttest: 3.535 Pvalue: 0.004 |
| CUGBP2   | 6            |                                                                                                                                                               |
|          |              | Study: Beer_Lung Experiment Type: mRNA Analysis: Lung Type Class 1: Normal Lung (10) Class 2: Lung Adenocarcinoma (86) Ttest: 9.412 Pvalue: 1.3E13            |
|          |              | Study: Wachi_Lung Experiment Type: mRNA Analysis: Lung Type Class 1: Normal Lung (5) Class 2: Squamous Cell Lung Carcinoma (5) Ttest: 14.48 Pvalue: 5.1E7     |
|          |              | Study: Su_Lung Experiment Type: mRNA Analysis: Lung Type Class 1: Normal Lung (31) Class 2: Lung Adenocarcinoma (31) Ttest: 4.917 Pvalue: 9.4E6               |

|       |    |                                                                                                                                                           |
|-------|----|-----------------------------------------------------------------------------------------------------------------------------------------------------------|
|       |    | Study: Garber_Lung Experiment Type: mRNA Analysis: Lung Type Class 1: Normal Lung (6) Class 2: Squamous Cell Lung Carcinoma (13) Ttest: 6.302 Pvalue: 1E5 |
|       |    | Study: Bhattacharjee_Lung Experiment Type: mRNA Analysis: Lung Type Class 1: Normal Lung (17) Class 2: Carcinoid (20) Ttest: 3.629 Pvalue: 0.002          |
|       |    | Study: Garber_Lung Experiment Type: mRNA Analysis: Lung Type Class 1: Normal Lung (6) Class 2: Lung Adenocarcinoma (40) Ttest: 3.401 Pvalue: 0.002        |
| RNH1  | 1  |                                                                                                                                                           |
|       |    | Study: Yu_Prostate Experiment Type: mRNA Analysis: Prostate Type Class 1: Normal Prostate (23) Class 2: Prostate Carcinoma (64) Ttest: 4.45 Pvalue: 6.5E5 |
| RBM25 | 1  |                                                                                                                                                           |
|       |    | Study: Beer_Lung Experiment Type: mRNA Analysis: Lung Type Class 1: Normal Lung (10) Class 2: Lung Adenocarcinoma (86) Ttest: 3.117 Pvalue: 0.005         |
| TACC1 | 11 |                                                                                                                                                           |
|       |    | Study: Su_Lung Experiment Type: mRNA Analysis: Lung Type Class 1: Normal Lung (31) Class 2: Lung Adenocarcinoma (31) Ttest: 9.908 Pvalue: 8E13            |

|  |  |                                                                                                                                                                      |
|--|--|----------------------------------------------------------------------------------------------------------------------------------------------------------------------|
|  |  | Study: Stearman_Lung Experiment Type: mRNA Analysis: Lung Type Class 1: Normal Lung (19) Class 2: Lung Adenocarcinoma (20) Ttest: 10.271 Pvalue: 1.7E10              |
|  |  | Study: Bhattacharjee_Lung Experiment Type: mRNA Analysis: Lung Type Class 1: Normal Lung (17) Class 2: Squamous Cell Lung Carcinoma (21) Ttest: 8.606 Pvalue: 4.2E10 |
|  |  | Study: Bhattacharjee_Lung Experiment Type: mRNA Analysis: Lung Type Class 1: Normal Lung (17) Class 2: Lung Adenocarcinoma (139) Ttest: 7.729 Pvalue: 1.3E7          |
|  |  | Study: Garber_Lung Experiment Type: mRNA Analysis: Lung Type Class 1: Normal Lung (6) Class 2: Lung Adenocarcinoma (40) Ttest: 6.378 Pvalue: 6.1E7                   |
|  |  | Study: Wachi_Lung Experiment Type: mRNA Analysis: Lung Type Class 1: Normal Lung (5) Class 2: Squamous Cell Lung Carcinoma (5) Ttest: 8.85 Pvalue: 8.9E5             |

|  |  |                                                                                                                                                             |
|--|--|-------------------------------------------------------------------------------------------------------------------------------------------------------------|
|  |  | Study: Garber_Lung Experiment Type: mRNA Analysis: Lung Type Class 1: Normal Lung (6) Class 2: Squamous Cell Lung Carcinoma (13) Ttest: 4.604 Pvalue: 3.5E4 |
|  |  | Study: Bhattacharjee_Lung Experiment Type: mRNA Analysis: Lung Type Class 1: Normal Lung (17) Class 2: Small Cell Lung Cancer (6) Ttest: 4.54 Pvalue: 0.002 |

|  |  |                                                                                                                                                      |
|--|--|------------------------------------------------------------------------------------------------------------------------------------------------------|
|  |  | Study: Yamagata_Lung Experiment Type: mRNA Analysis: Lung Type Class 1: Normal Lung (3) Class 2: Lung Adenocarcinoma (9) Ttest: 3.582 Pvalue: 0.007  |
|  |  | Study: Garber_Lung Experiment Type: mRNA Analysis: Lung Type Class 1: Normal Lung (6) Class 2: Small Cell Lung Cancer (4) Ttest: 4.267 Pvalue: 0.009 |
|  |  | Study: Bhattacharjee_Lung Experiment Type: mRNA Analysis: Lung Type Class 1: Normal Lung (17) Class 2: Carcinoid (20) Ttest: 2.741 Pvalue: 0.01      |

| Name    | # of Studies | Study Details                                                                                                                                                                                                                           |
|---------|--------------|-----------------------------------------------------------------------------------------------------------------------------------------------------------------------------------------------------------------------------------------|
| ANKRD17 | 3            |                                                                                                                                                                                                                                         |
|         |              | Study: Lapointe_Prostate Experiment Type: mRNA Analysis: Prostate Type Class 1: Normal Prostate (41) Class 2: Prostate Carcinoma (62) Ttest: 5.72 Pvalue: 1.5E7                                                                         |
|         |              | Study: Vanaja_Prostate Experiment Type: mRNA Analysis: Prostate Type Class 1: Normal Prostate (8) Class 2: Prostate Adenocarcinoma (27) Ttest: 4.321 Pvalue: 0.002                                                                      |
|         |              | Study: Dhanasekaran_Prostate Experiment Type: mRNA Analysis: Prostate Type Class 1: Normal Prostate (6), Benign Prostatic Hyperplasia (16) Class 2: Primary Prostate Carcinoma (59) Ttest: 3.064 Pvalue: 0.004                          |
| DICER   | 1            |                                                                                                                                                                                                                                         |
|         |              | Study: Tomlins_Prostate Experiment Type: mRNA Analysis: Prostate Epithelium Type Class 1: Benign Prostate (22) Class 2: Prostate Carcinoma (30) Ttest: 5.412 Pvalue: 2.3E6                                                              |
| SNRPA   | 2            |                                                                                                                                                                                                                                         |
|         |              | Study: Dhanasekaran_Prostate_2 Experiment Type: mRNA Analysis: Prostate Type Class 1: Normal Adjacent Prostate (2), Normal Adult Prostate (7), Normal Pubertal Prostate (3) Class 2: Prostate Carcinoma (25) Ttest: 6.255 Pvalue: 5.4E7 |
|         |              | Study: Dhanasekaran_Prostate Experiment Type: mRNA Analysis: Prostate Type Class 1: Normal Prostate (6), Benign Prostatic Hyperplasia (16) Class 2: Primary Prostate Carcinoma (59) Ttest: 3.846 Pvalue: 4E4                            |
| CSTF3   | 4            |                                                                                                                                                                                                                                         |

|           |   |                                                                                                                                                                                                                                         |
|-----------|---|-----------------------------------------------------------------------------------------------------------------------------------------------------------------------------------------------------------------------------------------|
|           |   | Study: Lapointe_Prostate Experiment Type: mRNA Analysis: Prostate Type Class 1: Normal Prostate (41) Class 2: Prostate Carcinoma (62) Ttest: 3.582 Pvalue: 5.3E4                                                                        |
|           |   | Study: Yu_Prostate Experiment Type: mRNA Analysis: Prostate Type Class 1: Normal Prostate (23) Class 2: Prostate Carcinoma (64) Ttest: 3.285 Pvalue: 0.002                                                                              |
|           |   | Study: Dhanasekaran_Prostate_2 Experiment Type: mRNA Analysis: Prostate Type Class 1: Normal Adjacent Prostate (2), Normal Adult Prostate (7), Normal Pubertal Prostate (3) Class 2: Prostate Carcinoma (25) Ttest: 3.529 Pvalue: 0.002 |
|           |   | Study: Tomlins_Prostate Experiment Type: mRNA Analysis: Prostate Epithelium Type Class 1: Benign Prostate (22) Class 2: Prostate Carcinoma (30) Ttest: 3.146 Pvalue: 0.003                                                              |
| NOL8      | 2 |                                                                                                                                                                                                                                         |
|           |   | Study: Lapointe_Prostate Experiment Type: mRNA Analysis: Prostate Type Class 1: Normal Prostate (41) Class 2: Prostate Carcinoma (62) Ttest: 3.988 Pvalue: 1.5E4                                                                        |
|           |   | Study: Dhanasekaran_Prostate_2 Experiment Type: mRNA Analysis: Prostate Type Class 1: Normal Adjacent Prostate (2), Normal Adult Prostate (7), Normal Pubertal Prostate (3) Class 2: Prostate Carcinoma (25) Ttest: 3.13 Pvalue: 0.004  |
| C20orf119 | 1 |                                                                                                                                                                                                                                         |

|        |   |                                                                                                                                                                                                                                         |
|--------|---|-----------------------------------------------------------------------------------------------------------------------------------------------------------------------------------------------------------------------------------------|
|        |   | Study: Lapointe_Prostate Experiment Type: mRNA Analysis: Prostate Type Class 1: Normal Prostate (41) Class 2: Prostate Carcinoma (62) Ttest: 3.28 Pvalue: 0.001                                                                         |
| STRBP  | 2 |                                                                                                                                                                                                                                         |
|        |   | Study: Vanaja_Prostate Experiment Type: mRNA Analysis: Prostate Type Class 1: Normal Prostate (8) Class 2: Prostate Adenocarcinoma (27) Ttest: 5.67 Pvalue: 1E5                                                                         |
|        |   | Study: Varambally_Prostate Experiment Type: mRNA Analysis: Prostate Type Class 1: Benign Prostate (6) Class 2: Prostate Carcinoma (7) Ttest: 3.531 Pvalue: 0.005                                                                        |
| CSTF2  | 3 |                                                                                                                                                                                                                                         |
|        |   | Study: Dhanasekaran_Prostate_2 Experiment Type: mRNA Analysis: Prostate Type Class 1: Normal Adjacent Prostate (2), Normal Adult Prostate (7), Normal Pubertal Prostate (3) Class 2: Prostate Carcinoma (25) Ttest: 8.195 Pvalue: 1.3E8 |
|        |   | Study: Tomlins_Prostate Experiment Type: mRNA Analysis: Prostate Epithelium Type Class 1: Benign Prostate (22) Class 2: Prostate Carcinoma (30) Ttest: 3.197 Pvalue: 0.002                                                              |
|        |   | Study: Dhanasekaran_Prostate Experiment Type: mRNA Analysis: Prostate Type Class 1: Normal Prostate (6), Benign Prostatic Hyperplasia (16) Class 2: Primary Prostate Carcinoma (59) Ttest: 2.991 Pvalue: 0.006                          |
| RBM35A | 4 |                                                                                                                                                                                                                                         |

|       |   |                                                                                                                                                                                                                                         |
|-------|---|-----------------------------------------------------------------------------------------------------------------------------------------------------------------------------------------------------------------------------------------|
|       |   | Study: Vanaja_Prostate Experiment Type: mRNA Analysis: Prostate Type Class 1: Normal Prostate (8) Class 2: Prostate Adenocarcinoma (27) Ttest: 9.183 Pvalue: 9E10                                                                       |
|       |   | Study: Dhanasekaran_Prostate_2 Experiment Type: mRNA Analysis: Prostate Type Class 1: Normal Adjacent Prostate (2), Normal Adult Prostate (7), Normal Pubertal Prostate (3) Class 2: Prostate Carcinoma (25) Ttest: 6.096 Pvalue: 1.9E6 |
|       |   | Study: Lapointe_Prostate Experiment Type: mRNA Analysis: Prostate Type Class 1: Normal Prostate (41) Class 2: Prostate Carcinoma (62) Ttest: 4.95 Pvalue: 3.4E6                                                                         |
|       |   | Study: Liu_Prostate Experiment Type: mRNA Analysis: Prostate Type Class 1: Adjacent Normal Prostate (13) Class 2: Prostate Carcinoma (44) Ttest: 3.136 Pvalue: 0.004                                                                    |
| TUT1  | 1 |                                                                                                                                                                                                                                         |
|       |   | Study: Lapointe_Prostate Experiment Type: mRNA Analysis: Prostate Type Class 1: Normal Prostate (41) Class 2: Prostate Carcinoma (62) Ttest: 2.926 Pvalue: 0.004                                                                        |
| SYNJ2 | 4 |                                                                                                                                                                                                                                         |
|       |   | Study: Lapointe_Prostate Experiment Type: mRNA Analysis: Prostate Type Class 1: Normal Prostate (41) Class 2: Prostate Carcinoma (62) Ttest: 5.758 Pvalue: 9.6E8                                                                        |

|  |  |                                                                                                                                                                                                |
|--|--|------------------------------------------------------------------------------------------------------------------------------------------------------------------------------------------------|
|  |  | Study: Vanaja_Prostate Experiment Type: mRNA Analysis: Prostate Type Class 1: Normal Prostate (8) Class 2: Prostate Adenocarcinoma (27) Ttest: 5.338 Pvalue: 4.3E5                             |
|  |  | Study: Welsh_Prostate Experiment Type: mRNA Analysis: Prostate Type Class 1: Normal Prostate (9) Class 2: Prostate Carcinoma (25) Ttest: 4.627 Pvalue: 2.4E4                                   |
|  |  | Study: Nanni_Prostate Experiment Type: mRNA Analysis: Prostate Type Class 1: Normal Prostate (1), Benign Prostatic Hyperplasia (2) Class 2: Prostate Carcinoma (22) Ttest: 3.924 Pvalue: 0.002 |

| Name  | # of Studies | Study Details                                                                                                                                                                                                                           |
|-------|--------------|-----------------------------------------------------------------------------------------------------------------------------------------------------------------------------------------------------------------------------------------|
| TACC1 | 9            |                                                                                                                                                                                                                                         |
|       |              | Study: Lapointe_Prostate Experiment Type: mRNA Analysis: Prostate Type Class 1: Normal Prostate (41) Class 2: Prostate Carcinoma (62) Ttest: 8.674 Pvalue: 1.2E13                                                                       |
|       |              | Study: Dhanasekaran_Prostate_2 Experiment Type: mRNA Analysis: Prostate Type Class 1: Normal Adjacent Prostate (2), Normal Adult Prostate (7), Normal Pubertal Prostate (3) Class 2: Prostate Carcinoma (25) Ttest: 7.941 Pvalue: 5.3E8 |
|       |              | Study: Yu_Prostate Experiment Type: mRNA Analysis: Prostate Type Class 1: Normal Prostate (23) Class 2: Prostate Carcinoma (64) Ttest: 4.807 Pvalue: 1.6E5                                                                              |



|  |  |                                                                                                                                                                                                                |
|--|--|----------------------------------------------------------------------------------------------------------------------------------------------------------------------------------------------------------------|
|  |  | Study: Liu_Prostate Experiment Type: mRNA Analysis: Prostate Type Class 1: Adjacent Normal Prostate (13) Class 2: Prostate Carcinoma (44) Ttest: 4.782 Pvalue: 2.9E5                                           |
|  |  | Study: Vanaja_Prostate Experiment Type: mRNA Analysis: Prostate Type Class 1: Normal Prostate (8) Class 2: Prostate Adenocarcinoma (27) Ttest: 4.901 Pvalue: 1.2E4                                             |
|  |  | Study: Dhanasekaran_Prostate Experiment Type: mRNA Analysis: Prostate Type Class 1: Normal Prostate (6), Benign Prostatic Hyperplasia (16) Class 2: Primary Prostate Carcinoma (59) Ttest: 4.236 Pvalue: 1.2E4 |

|       |   |                                                                                                                                                                                                               |
|-------|---|---------------------------------------------------------------------------------------------------------------------------------------------------------------------------------------------------------------|
|       |   | Study: Welsh_Prostate Experiment Type: mRNA Analysis: Prostate Type Class 1: Normal Prostate (9) Class 2: Prostate Carcinoma (25) Ttest: 5.818 Pvalue: 1.4E4                                                  |
|       |   | Study: Luo_Prostate Experiment Type: mRNA Analysis: Prostate Type Class 1: Benign Prostatic Hyperplasia (9) Class 2: Prostate Carcinoma (16) Ttest: 3.765 Pvalue: 0.001                                       |
|       |   | Study: Varambally_Prostate Experiment Type: mRNA Analysis: Prostate Type Class 1: Benign Prostate (6) Class 2: Prostate Carcinoma (7) Ttest: 3.711 Pvalue: 0.004                                              |
| RBM38 | 3 |                                                                                                                                                                                                               |
|       |   | Study: Dhanasekaran_Prostate Experiment Type: mRNA Analysis: Prostate Type Class 1: Normal Prostate (6), Benign Prostatic Hyperplasia (16) Class 2: Primary Prostate Carcinoma (59) Ttest: 3.28 Pvalue: 0.002 |
|       |   | Study: Luo_Prostate Experiment Type: mRNA Analysis: Prostate Type Class 1: Benign Prostatic Hyperplasia (9) Class 2: Prostate Carcinoma (16) Ttest: 3.355 Pvalue: 0.003                                       |

|         |   |                                                                                                                                                                                                                                         |
|---------|---|-----------------------------------------------------------------------------------------------------------------------------------------------------------------------------------------------------------------------------------------|
|         |   | Study: Tomlins_Prostate Experiment Type: mRNA Analysis: Prostate Epithelium Type Class 1: Benign Prostate (22) Class 2: Prostate Carcinoma (30) Ttest: 2.81 Pvalue: 0.007                                                               |
| IGF2BP3 | 2 |                                                                                                                                                                                                                                         |
|         |   | Study: Varambally_Prostate Experiment Type: mRNA Analysis: Prostate Type Class 1: Benign Prostate (6) Class 2: Prostate Carcinoma (7) Ttest: 4.973 Pvalue: 5.7E4                                                                        |
|         |   | Study: Tomlins_Prostate Experiment Type: mRNA Analysis: Prostate Epithelium Type Class 1: Benign Prostate (22) Class 2: Prostate Carcinoma (30) Ttest: 3.144 Pvalue: 0.003                                                              |
| IREB1   | 4 |                                                                                                                                                                                                                                         |
|         |   | Study: Yu_Prostate Experiment Type: mRNA Analysis: Prostate Type Class 1: Normal Prostate (23) Class 2: Prostate Carcinoma (64) Ttest: 4.784 Pvalue: 1.6E5                                                                              |
|         |   | Study: Singh_Prostate Experiment Type: mRNA Analysis: Prostate Type Class 1: Normal Prostate (50) Class 2: Prostate Carcinoma (52) Ttest: 3.371 Pvalue: 0.001                                                                           |
|         |   | Study: Dhanasekaran_Prostate_2 Experiment Type: mRNA Analysis: Prostate Type Class 1: Normal Adjacent Prostate (2), Normal Adult Prostate (7), Normal Pubertal Prostate (3) Class 2: Prostate Carcinoma (25) Ttest: 3.479 Pvalue: 0.003 |

|     |   |                                                                                                                                                                  |
|-----|---|------------------------------------------------------------------------------------------------------------------------------------------------------------------|
|     |   | Study: Lapointe_Prostate Experiment Type: mRNA Analysis: Prostate Type Class 1: Normal Prostate (41) Class 2: Prostate Carcinoma (62) Ttest: 2.87 Pvalue: 0.005  |
| ACF | 1 |                                                                                                                                                                  |
|     |   | Study: Lapointe_Prostate Experiment Type: mRNA Analysis: Prostate Type Class 1: Normal Prostate (41) Class 2: Prostate Carcinoma (62) Ttest: 2.854 Pvalue: 0.006 |

| Name  | # of Studies | Study Details                                                                                                                                          |
|-------|--------------|--------------------------------------------------------------------------------------------------------------------------------------------------------|
| IREB1 | 1            |                                                                                                                                                        |
|       |              | Study: Huang_Thyroid Experiment Type: mRNA Analysis: Thyroid Type Class 1: Normal Thyroid (8) Class 2: Thyroid Carcinoma (8) Ttest: 5.24 Pvalue: 1.3E4 |

| Name  | # of Studies | Study Details |
|-------|--------------|---------------|
| RBM28 | 3            |               |

|  |  |                                                                                                                                                                                     |
|--|--|-------------------------------------------------------------------------------------------------------------------------------------------------------------------------------------|
|  |  | Study: Andersson_Leukemia Experiment Type: mRNA Analysis: Leukemia Type Class 1: Normal Bone Marrow (6) Class 2: TCell Acute Lymphoblastic Leukemia (11) Ttest: 6.081 Pvalue: 2.6E4 |
|  |  | Study: Andersson_Leukemia Experiment Type: mRNA Analysis: Leukemia Type Class 1: Normal Bone Marrow (6) Class 2: BCell Acute Lymphoblastic Leukemia (87) Ttest: 5.228 Pvalue: 0.002 |
|  |  | Study: Andersson_Leukemia Experiment Type: mRNA Analysis: Leukemia Type Class 1: Normal Bone Marrow (6) Class 2: Acute Myeloid Leukemia (23) Ttest: 3.316 Pvalue: 0.004             |

| Name  | # of Studies | Study Details                                                                                                                                                                              |
|-------|--------------|--------------------------------------------------------------------------------------------------------------------------------------------------------------------------------------------|
| U2AF2 | 1            |                                                                                                                                                                                            |
|       |              | Study: Haslinger_Leukemia Experiment Type: mRNA Analysis: BCell Type Class 1: Normal BCells (11) Class 2: Chronic Lymphocytic Leukemia (100) Ttest: 3.457 Pvalue: 0.005 Reporter: 32557_at |
| ROD1  | 3            |                                                                                                                                                                                            |
|       |              | Study: Andersson_Leukemia Experiment Type: mRNA Analysis: Leukemia Type Class 1: Normal Bone Marrow (6) Class 2: BCell Acute Lymphoblastic Leukemia (87) Ttest: 6.888 Pvalue: 6.9E6        |
|       |              | Study: Andersson_Leukemia Experiment Type: mRNA Analysis: Leukemia Type Class 1: Normal Bone Marrow (6) Class 2: Acute Myeloid Leukemia (23) Ttest: 5.168 Pvalue: 1.8E4                    |
|       |              | Study: Haslinger_Leukemia Experiment Type: mRNA Analysis: BCell Type Class 1: Normal BCells (11) Class 2: Chronic Lymphocytic Leukemia (100) Ttest: 3.222 Pvalue: 0.007                    |
| CPEB2 | 3            |                                                                                                                                                                                            |
|       |              | Study: Andersson_Leukemia Experiment Type: mRNA Analysis: Leukemia Type Class 1: Normal Bone Marrow (6) Class 2: BCell Acute Lymphoblastic Leukemia (87) Ttest: 10.568 Pvalue: 7.4E9       |

|       |   |                                                                                                                                                                                                                                               |
|-------|---|-----------------------------------------------------------------------------------------------------------------------------------------------------------------------------------------------------------------------------------------------|
|       |   | Study: Andersson_Leukemia Experiment Type: mRNA Analysis: Leukemia Type Class 1: Normal Bone Marrow (6) Class 2: Acute Myeloid Leukemia (23) Ttest: 5.906 Pvalue: 3.2E6                                                                       |
|       |   | Study: Andersson_Leukemia Experiment Type: mRNA Analysis: Leukemia Type Class 1: Normal Bone Marrow (6) Class 2: TCell Acute Lymphoblastic Leukemia (11) Ttest: 6.123 Pvalue: 6.5E5                                                           |
| SAFB2 | 2 |                                                                                                                                                                                                                                               |
|       |   | Study: Andersson_Leukemia Experiment Type: mRNA Analysis: Leukemia Type Class 1: Normal Bone Marrow (6) Class 2: BCell Acute Lymphoblastic Leukemia (87) Ttest: 4.503 Pvalue: 1.3E4                                                           |
|       |   | Study: Andersson_Leukemia Experiment Type: mRNA Analysis: Leukemia Type Class 1: Normal Bone Marrow (6) Class 2: Acute Myeloid Leukemia (23) Ttest: 3.321 Pvalue: 0.003                                                                       |
| SRP14 | 1 |                                                                                                                                                                                                                                               |
|       |   | Study: Maia_Leukemia Experiment Type: mRNA Analysis: BCell Type Class 1: Normal Pre BCell (CD19+, 2lg) (5), Normal Immature BCell (CD19+, slg+) (3) Class 2: Acute Lymphoblastic Leukemia (TEL/AML1 Genotype) (20) Ttest: 2.913 Pvalue: 0.008 |
| SR140 | 2 |                                                                                                                                                                                                                                               |
|       |   | Study: Durig_Leukemia Experiment Type: mRNA Analysis: CD3+ Purified Peripheral Blood Cells Type Class 1: Normal (8) Class 2: inv(14)(q11q32)Positive TCell Prolymphocytic Leukemia (5) Ttest: 4.776 Pvalue: 5.8E4                             |

|        |   |                                                                                                                                                                                                                                                                   |
|--------|---|-------------------------------------------------------------------------------------------------------------------------------------------------------------------------------------------------------------------------------------------------------------------|
|        |   | Study: Maia_Leukemia Experiment Type: mRNA Analysis: BCell Type Class 1: Normal Pre BCell (CD19+, 2lg) (5), Normal Immature BCell (CD19+, slg+) (3) Class 2: Acute Lymphoblastic Leukemia (TEL/AML1 Genotype) (20) Ttest: 2.915 Pvalue: 0.009 Reporter: 212058_at |
| SNRP70 | 3 |                                                                                                                                                                                                                                                                   |
|        |   | Study: Andersson_Leukemia Experiment Type: mRNA Analysis: Leukemia Type Class 1: Normal Bone Marrow (6) Class 2: Acute Myeloid Leukemia (23) Ttest: 5.524 Pvalue: 2.4E5                                                                                           |
|        |   | Study: Andersson_Leukemia Experiment Type: mRNA Analysis: Leukemia Type Class 1: Normal Bone Marrow (6) Class 2: BCell Acute Lymphoblastic Leukemia (87) Ttest: 6.759 Pvalue: 3.7E5                                                                               |

|        |   |                                                                                                                                                                                              |
|--------|---|----------------------------------------------------------------------------------------------------------------------------------------------------------------------------------------------|
|        |   | Study: Andersson_Leukemia Experiment Type: mRNA<br>Analysis: Leukemia Type Class 1: Normal<br>Bone Marrow (6) Class 2: TCell Acute Lymphoblastic<br>Leukemia (11) Ttest: 4.508 Pvalue: 4.4E4 |
| SFRS12 | 1 |                                                                                                                                                                                              |
|        |   | Study: Haslinger_Leukemia Experiment Type: mRNA<br>Analysis: BCell Type Class 1: Normal BCells (11) Class 2:<br>Chronic Lymphocytic Leukemia (100) Ttest:<br>3.517 Pvalue: 0.004             |
| TACC1  | 4 |                                                                                                                                                                                              |

|      |   |                                                                                                                                                                                              |
|------|---|----------------------------------------------------------------------------------------------------------------------------------------------------------------------------------------------|
|      |   | Study: Andersson_Leukemia Experiment Type: mRNA<br>Analysis: Leukemia Type Class 1: Normal<br>Bone Marrow (6) Class 2: BCell Acute Lymphoblastic<br>Leukemia (87) Ttest: 9.063 Pvalue: 4E12  |
|      |   | Study: Andersson_Leukemia Experiment Type: mRNA<br>Analysis: Leukemia Type Class 1: Normal<br>Bone Marrow (6) Class 2: TCell Acute Lymphoblastic<br>Leukemia (11) Ttest: 9.8 Pvalue: 8.4E8   |
|      |   | Study: Andersson_Leukemia Experiment Type: mRNA<br>Analysis: Leukemia Type Class 1: Normal<br>Bone Marrow (6) Class 2: Acute Myeloid Leukemia (23)<br>Ttest: 7.154 Pvalue: 1.1E7             |
|      |   | Study: Haslinger_Leukemia Experiment Type: mRNA<br>Analysis: BCell Type Class 1: Normal BCells (11) Class 2:<br>Chronic Lymphocytic Leukemia (100) Ttest:<br>7.349 Pvalue: 4.3E6             |
| SLTM | 2 |                                                                                                                                                                                              |
|      |   | Study: Andersson_Leukemia Experiment Type: mRNA<br>Analysis: Leukemia Type Class 1: Normal<br>Bone Marrow (6) Class 2: Acute Myeloid Leukemia (23)<br>Ttest: 4.222 Pvalue: 3.6E4             |
|      |   | Study: Andersson_Leukemia Experiment Type: mRNA<br>Analysis: Leukemia Type Class 1: Normal<br>Bone Marrow (6) Class 2: BCell Acute Lymphoblastic<br>Leukemia (87) Ttest: 4.117 Pvalue: 0.002 |

|       |   |                                                                                                                                                                                                |
|-------|---|------------------------------------------------------------------------------------------------------------------------------------------------------------------------------------------------|
| RBMS1 | 3 |                                                                                                                                                                                                |
|       |   | Study: Andersson_Leukemia Experiment Type: mRNA<br>Analysis: Leukemia Type Class 1: Normal<br>Bone Marrow (6) Class 2: BCell Acute Lymphoblastic<br>Leukemia (87) Ttest: 11.291 Pvalue: 1.6E10 |
|       |   | Study: Andersson_Leukemia Experiment Type: mRNA<br>Analysis: Leukemia Type Class 1: Normal<br>Bone Marrow (6) Class 2: Acute Myeloid Leukemia (23)<br>Ttest: 6.017 Pvalue: 3.3E6               |
|       |   | Study: Andersson_Leukemia Experiment Type: mRNA<br>Analysis: Leukemia Type Class 1: Normal<br>Bone Marrow (6) Class 2: TCell Acute Lymphoblastic<br>Leukemia (11) Ttest: 6.986 Pvalue: 4.7E6   |
| MINT  | 2 |                                                                                                                                                                                                |
|       |   | Study: Andersson_Leukemia Experiment Type: mRNA<br>Analysis: Leukemia Type Class 1: Normal<br>Bone Marrow (6) Class 2: BCell Acute Lymphoblastic<br>Leukemia (87) Ttest: 5.02 Pvalue: 3.6E6    |
|       |   | Study: Andersson_Leukemia Experiment Type: mRNA<br>Analysis: Leukemia Type Class 1: Normal<br>Bone Marrow (6) Class 2: Acute Myeloid Leukemia (23)<br>Ttest: 5.013 Pvalue: 3.5E5               |
| LKAP  | 3 |                                                                                                                                                                                                |
|       |   | Study: Andersson_Leukemia Experiment Type: mRNA<br>Analysis: Leukemia Type Class 1: Normal<br>Bone Marrow (6) Class 2: Acute Myeloid Leukemia (23)<br>Ttest: 5.181 Pvalue: 7.6E4               |

|        |   |                                                                                                                                                                                                                                                           |
|--------|---|-----------------------------------------------------------------------------------------------------------------------------------------------------------------------------------------------------------------------------------------------------------|
|        |   | Study: Haslinger_Leukemia Experiment Type: mRNA<br>Analysis: BCell Type Class 1: Normal BCells (11) Class 2:<br>Chronic Lymphocytic Leukemia (100) Ttest:<br>4.024 Pvalue: 8.1E4                                                                          |
|        |   | Study: Andersson_Leukemia Experiment Type: mRNA<br>Analysis: Leukemia Type Class 1: Normal<br>Bone Marrow (6) Class 2: TCell Acute Lymphoblastic<br>Leukemia (11) Ttest: 4.653 Pvalue: 0.001                                                              |
| NOL8   | 2 |                                                                                                                                                                                                                                                           |
|        |   | Study: Durig_Leukemia Experiment Type: mRNA<br>Analysis: CD3+ Purified Peripheral Blood Cells Type<br>Class 1: Normal (8) Class 2: inv(14)<br>(q11q32)Positive TCell Prolymphocytic Leukemia (5)<br>Ttest: 3.922 Pvalue: 0.003                            |
|        |   | Study: Maia_Leukemia Experiment Type: mRNA<br>Analysis: BCell Type Class 1: Normal Pre BCell (CD19+,<br>2lg) (5), Normal Immature BCell (CD19+, slg+) (3) Class<br>2: Acute Lymphoblastic Leukemia (TEL/AML1 Genotype)<br>(20) Ttest: 3.323 Pvalue: 0.004 |
| MTHFSD | 1 |                                                                                                                                                                                                                                                           |

|      |   |                                                                                                                                                                                  |
|------|---|----------------------------------------------------------------------------------------------------------------------------------------------------------------------------------|
|      |   | Study: Andersson_Leukemia Experiment Type: mRNA<br>Analysis: Leukemia Type Class 1: Normal<br>Bone Marrow (6) Class 2: Acute Myeloid Leukemia (23)<br>Ttest: 3.907 Pvalue: 0.002 |
| FMR1 | 2 |                                                                                                                                                                                  |
|      |   | Study: Andersson_Leukemia Experiment Type: mRNA<br>Analysis: Leukemia Type Class 1: Normal<br>Bone Marrow (6) Class 2: Acute Myeloid Leukemia (23)<br>Ttest: 6.49 Pvalue: 5.6E5  |

|       |   |                                                                                                                                                                                                                                                           |
|-------|---|-----------------------------------------------------------------------------------------------------------------------------------------------------------------------------------------------------------------------------------------------------------|
|       |   | Study: Maia_Leukemia Experiment Type: mRNA<br>Analysis: BCell Type Class 1: Normal Pre BCell (CD19+,<br>2lg) (5), Normal Immature BCell (CD19+, slg+) (3) Class<br>2: Acute Lymphoblastic Leukemia (TEL/AML1 Genotype)<br>(20) Ttest: 3.165 Pvalue: 0.007 |
| ERAL1 | 3 |                                                                                                                                                                                                                                                           |
|       |   | Study: Andersson_Leukemia Experiment Type: mRNA<br>Analysis: Leukemia Type Class 1: Normal<br>Bone Marrow (6) Class 2: BCell Acute Lymphoblastic<br>Leukemia (87) Ttest: 10.715 Pvalue: 2.4E9                                                             |
|       |   | Study: Andersson_Leukemia Experiment Type: mRNA<br>Analysis: Leukemia Type Class 1: Normal<br>Bone Marrow (6) Class 2: TCell Acute Lymphoblastic<br>Leukemia (11) Ttest: 6.964 Pvalue: 8E6                                                                |
|       |   | Study: Andersson_Leukemia Experiment Type: mRNA<br>Analysis: Leukemia Type Class 1: Normal<br>Bone Marrow (6) Class 2: Acute Myeloid Leukemia (23)<br>Ttest: 4.974 Pvalue: 3.7E5                                                                          |
| LARP7 | 1 |                                                                                                                                                                                                                                                           |
|       |   | Study: Maia_Leukemia Experiment Type: mRNA<br>Analysis: BCell Type Class 1: Normal Pre BCell (CD19+,<br>2lg) (5), Normal Immature BCell (CD19+, slg+) (3) Class<br>2: Acute Lymphoblastic Leukemia (TEL/AML1 Genotype)<br>(20) Ttest: 7.237 Pvalue: 1.5E7 |
| KRR1  | 4 |                                                                                                                                                                                                                                                           |

|       |   |                                                                                                                                                                                                                                                           |
|-------|---|-----------------------------------------------------------------------------------------------------------------------------------------------------------------------------------------------------------------------------------------------------------|
|       |   | Study: Andersson_Leukemia Experiment Type: mRNA<br>Analysis: Leukemia Type Class 1: Normal<br>Bone Marrow (6) Class 2: BCell Acute Lymphoblastic<br>Leukemia (87) Ttest: 12.623 Pvalue: 1E13                                                              |
|       |   | Study: Andersson_Leukemia Experiment Type: mRNA<br>Analysis: Leukemia Type Class 1: Normal<br>Bone Marrow (6) Class 2: TCell Acute Lymphoblastic<br>Leukemia (11) Ttest: 6.694 Pvalue: 2.1E5                                                              |
|       |   | Study: Haslinger_Leukemia Experiment Type: mRNA<br>Analysis: BCell Type Class 1: Normal BCells (11) Class 2:<br>Chronic Lymphocytic Leukemia (100) Ttest:<br>5.036 Pvalue: 1.2E4                                                                          |
|       |   | Study: Maia_Leukemia Experiment Type: mRNA<br>Analysis: BCell Type Class 1: Normal Pre BCell (CD19+,<br>2lg) (5), Normal Immature BCell (CD19+, slg+) (3) Class<br>2: Acute Lymphoblastic Leukemia (TEL/AML1 Genotype)<br>(20) Ttest: 3.839 Pvalue: 0.002 |
| RBM25 | 1 |                                                                                                                                                                                                                                                           |
|       |   | Study: Andersson_Leukemia Experiment Type: mRNA<br>Analysis: Leukemia Type Class 1: Normal<br>Bone Marrow (6) Class 2: Acute Myeloid Leukemia (23)<br>Ttest: 4.068 Pvalue: 0.002                                                                          |
| RBM23 | 1 |                                                                                                                                                                                                                                                           |
|       |   | Study: Andersson_Leukemia Experiment Type: mRNA<br>Analysis: Leukemia Type Class 1: Normal<br>Bone Marrow (6) Class 2: Acute Myeloid Leukemia (23)<br>Ttest: 3.26 Pvalue: 0.005                                                                           |
| RBM44 | 1 |                                                                                                                                                                                                                                                           |

|       |   |                                                                                                                                                                                                                                                           |
|-------|---|-----------------------------------------------------------------------------------------------------------------------------------------------------------------------------------------------------------------------------------------------------------|
|       |   | Study: Maser_Leukemia Experiment Type: DNA<br>Analysis: Leukemia Type Class 0: TCell<br>Acute Lymphoblastic Leukemia (18) One Sample Ttest:<br>11.511 Pvalue: 1.9E9                                                                                       |
| RBM26 | 1 |                                                                                                                                                                                                                                                           |
|       |   | Study: Maia_Leukemia Experiment Type: mRNA<br>Analysis: BCell Type Class 1: Normal Pre BCell (CD19+,<br>2lg) (5), Normal Immature BCell (CD19+, slg+) (3) Class<br>2: Acute Lymphoblastic Leukemia (TEL/AML1 Genotype)<br>(20) Ttest: 3.891 Pvalue: 7.1E4 |
| ACIN1 | 4 |                                                                                                                                                                                                                                                           |
|       |   | Study: Andersson_Leukemia Experiment Type: mRNA<br>Analysis: Leukemia Type Class 1: Normal<br>Bone Marrow (6) Class 2: BCell Acute Lymphoblastic<br>Leukemia (87) Ttest: 7.86 Pvalue: 8.5E9                                                               |
|       |   | Study: Andersson_Leukemia Experiment Type: mRNA<br>Analysis: Leukemia Type Class 1: Normal<br>Bone Marrow (6) Class 2: Acute Myeloid Leukemia (23)<br>Ttest: 6.224 Pvalue: 1.2E6                                                                          |
|       |   | Study: Andersson_Leukemia Experiment Type: mRNA<br>Analysis: Leukemia Type Class 1: Normal<br>Bone Marrow (6) Class 2: TCell Acute Lymphoblastic<br>Leukemia (11) Ttest: 7.818 Pvalue: 1.4E6                                                              |

|      |   |                                                                                                                                                                                                                                |
|------|---|--------------------------------------------------------------------------------------------------------------------------------------------------------------------------------------------------------------------------------|
|      |   | Study: Durig_Leukemia Experiment Type: mRNA<br>Analysis: CD3+ Purified Peripheral Blood Cells Type<br>Class 1: Normal (8) Class 2: inv(14)<br>(q11q32)Positive TCell Prolymphocytic Leukemia (5)<br>Ttest: 4.235 Pvalue: 0.003 |
| DND1 | 1 |                                                                                                                                                                                                                                |

|       |   |                                                                                                                                                                                                                                                           |
|-------|---|-----------------------------------------------------------------------------------------------------------------------------------------------------------------------------------------------------------------------------------------------------------|
|       |   | Study: Durig_Leukemia Experiment Type: mRNA<br>Analysis: CD3+ Purified Peripheral Blood Cells Type<br>Class 1: Normal (8) Class 2: inv(14)<br>(q11q32)Positive TCell Prolymphocytic Leukemia (5)<br>Ttest: 3.549 Pvalue: 0.005                            |
| RBM16 | 2 |                                                                                                                                                                                                                                                           |
|       |   | Study: Haslinger_Leukemia Experiment Type: mRNA<br>Analysis: BCell Type Class 1: Normal BCells (11) Class 2:<br>Chronic Lymphocytic Leukemia (100) Ttest:<br>5.036 Pvalue: 2.3E4                                                                          |
|       |   | Study: Andersson_Leukemia Experiment Type: mRNA<br>Analysis: Leukemia Type Class 1: Normal<br>Bone Marrow (6) Class 2: Acute Myeloid Leukemia (23)<br>Ttest: 3.357 Pvalue: 0.005                                                                          |
| PSPC1 | 1 |                                                                                                                                                                                                                                                           |
|       |   | Study: Maia_Leukemia Experiment Type: mRNA<br>Analysis: BCell Type Class 1: Normal Pre BCell (CD19+,<br>2lg) (5), Normal Immature BCell (CD19+, slg+) (3) Class<br>2: Acute Lymphoblastic Leukemia (TEL/AML1 Genotype)<br>(20) Ttest: 3.928 Pvalue: 0.001 |

©2009 Landes Bioscience.  
Do not distribute.

Supplementary file 14

| Biological Process | Gene    | PubMed ID                                                                                                                                                                                                                                                                                                                                                                                                                                                                                                                                                                                                                                                                                                                                                                                                                                                                                                                                                                                                                                                                                                                                                                                                                                                                                                                                                                                                                                                                                                                                                                                                                                                                                                                                                                                                                                                                                                                                                                                                                                                                 |
|--------------------|---------|---------------------------------------------------------------------------------------------------------------------------------------------------------------------------------------------------------------------------------------------------------------------------------------------------------------------------------------------------------------------------------------------------------------------------------------------------------------------------------------------------------------------------------------------------------------------------------------------------------------------------------------------------------------------------------------------------------------------------------------------------------------------------------------------------------------------------------------------------------------------------------------------------------------------------------------------------------------------------------------------------------------------------------------------------------------------------------------------------------------------------------------------------------------------------------------------------------------------------------------------------------------------------------------------------------------------------------------------------------------------------------------------------------------------------------------------------------------------------------------------------------------------------------------------------------------------------------------------------------------------------------------------------------------------------------------------------------------------------------------------------------------------------------------------------------------------------------------------------------------------------------------------------------------------------------------------------------------------------------------------------------------------------------------------------------------------------|
| Apoptosis          | ACO1    | <a href="#">11856741</a> , <a href="#">15169927</a>                                                                                                                                                                                                                                                                                                                                                                                                                                                                                                                                                                                                                                                                                                                                                                                                                                                                                                                                                                                                                                                                                                                                                                                                                                                                                                                                                                                                                                                                                                                                                                                                                                                                                                                                                                                                                                                                                                                                                                                                                       |
|                    | ADAR    | <a href="#">14613934</a> , <a href="#">15677478</a> , <a href="#">15746098</a> , <a href="#">16126896</a>                                                                                                                                                                                                                                                                                                                                                                                                                                                                                                                                                                                                                                                                                                                                                                                                                                                                                                                                                                                                                                                                                                                                                                                                                                                                                                                                                                                                                                                                                                                                                                                                                                                                                                                                                                                                                                                                                                                                                                 |
|                    | AKAP1   | <a href="#">11483602</a> , <a href="#">12427737</a>                                                                                                                                                                                                                                                                                                                                                                                                                                                                                                                                                                                                                                                                                                                                                                                                                                                                                                                                                                                                                                                                                                                                                                                                                                                                                                                                                                                                                                                                                                                                                                                                                                                                                                                                                                                                                                                                                                                                                                                                                       |
|                    | APOBEC1 | <a href="#">16055734</a>                                                                                                                                                                                                                                                                                                                                                                                                                                                                                                                                                                                                                                                                                                                                                                                                                                                                                                                                                                                                                                                                                                                                                                                                                                                                                                                                                                                                                                                                                                                                                                                                                                                                                                                                                                                                                                                                                                                                                                                                                                                  |
|                    | NKRF    | <a href="#">10777530</a> , <a href="#">12533512</a>                                                                                                                                                                                                                                                                                                                                                                                                                                                                                                                                                                                                                                                                                                                                                                                                                                                                                                                                                                                                                                                                                                                                                                                                                                                                                                                                                                                                                                                                                                                                                                                                                                                                                                                                                                                                                                                                                                                                                                                                                       |
|                    | NOL8    | <a href="#">15132771</a>                                                                                                                                                                                                                                                                                                                                                                                                                                                                                                                                                                                                                                                                                                                                                                                                                                                                                                                                                                                                                                                                                                                                                                                                                                                                                                                                                                                                                                                                                                                                                                                                                                                                                                                                                                                                                                                                                                                                                                                                                                                  |
|                    | NPM1    | <a href="#">7721868</a> , <a href="#">9881708</a> , <a href="#">10233871</a> , <a href="#">10362140</a> , <a href="#">10391679</a> , <a href="#">10597193</a> , <a href="#">11054668</a> , <a href="#">11110708</a> , <a href="#">11125022</a> , <a href="#">11280786</a> , <a href="#">11522649</a> , <a href="#">11704868</a> , <a href="#">11756229</a> , <a href="#">12067985</a> , <a href="#">12244208</a> , <a href="#">12374805</a> , <a href="#">12691918</a> , <a href="#">12748172</a> , <a href="#">12748950</a> , <a href="#">12882984</a> , <a href="#">14508522</a> , <a href="#">14583466</a> , <a href="#">14656879</a> , <a href="#">14962911</a> , <a href="#">15087454</a> , <a href="#">15126367</a> , <a href="#">15297316</a> , <a href="#">15310764</a> , <a href="#">15374880</a> , <a href="#">15459011</a> , <a href="#">15514966</a> , <a href="#">15831697</a> , <a href="#">15883821</a> , <a href="#">15886198</a> , <a href="#">15893727</a> , <a href="#">15928040</a> , <a href="#">15964625</a> , <a href="#">16046528</a> , <a href="#">16076867</a> , <a href="#">16103750</a> , <a href="#">16105984</a> , <a href="#">16135792</a> , <a href="#">16166282</a> , <a href="#">16170336</a> , <a href="#">16199867</a> , <a href="#">16210342</a> , <a href="#">16304056</a> , <a href="#">16317043</a> , <a href="#">16455956</a> , <a href="#">16469875</a> , <a href="#">16540653</a> , <a href="#">16597596</a> , <a href="#">16709933</a> , <a href="#">16735125</a> , <a href="#">16763206</a> , <a href="#">16818631</a> , <a href="#">16827655</a> , <a href="#">16857742</a> , <a href="#">16880530</a> , <a href="#">16982741</a> , <a href="#">17072349</a> , <a href="#">17073594</a> , <a href="#">17111047</a> , <a href="#">17185414</a> , <a href="#">17277230</a> , <a href="#">17483340</a> , <a href="#">17611412</a> , <a href="#">17612934</a> , <a href="#">18214681</a> , <a href="#">18288131</a> , <a href="#">18345031</a> , <a href="#">18420587</a> , <a href="#">18574026</a> , <a href="#">18974134</a> |
|                    | PABPC4  | <a href="#">11352910</a>                                                                                                                                                                                                                                                                                                                                                                                                                                                                                                                                                                                                                                                                                                                                                                                                                                                                                                                                                                                                                                                                                                                                                                                                                                                                                                                                                                                                                                                                                                                                                                                                                                                                                                                                                                                                                                                                                                                                                                                                                                                  |
|                    | PNPT1   | <a href="#">16410805</a> , <a href="#">17804700</a>                                                                                                                                                                                                                                                                                                                                                                                                                                                                                                                                                                                                                                                                                                                                                                                                                                                                                                                                                                                                                                                                                                                                                                                                                                                                                                                                                                                                                                                                                                                                                                                                                                                                                                                                                                                                                                                                                                                                                                                                                       |
|                    | PTBP1   | <a href="#">16885029</a>                                                                                                                                                                                                                                                                                                                                                                                                                                                                                                                                                                                                                                                                                                                                                                                                                                                                                                                                                                                                                                                                                                                                                                                                                                                                                                                                                                                                                                                                                                                                                                                                                                                                                                                                                                                                                                                                                                                                                                                                                                                  |
|                    | PUF60   | <a href="#">16452196</a>                                                                                                                                                                                                                                                                                                                                                                                                                                                                                                                                                                                                                                                                                                                                                                                                                                                                                                                                                                                                                                                                                                                                                                                                                                                                                                                                                                                                                                                                                                                                                                                                                                                                                                                                                                                                                                                                                                                                                                                                                                                  |
|                    | RBM10   | <a href="#">15514923</a>                                                                                                                                                                                                                                                                                                                                                                                                                                                                                                                                                                                                                                                                                                                                                                                                                                                                                                                                                                                                                                                                                                                                                                                                                                                                                                                                                                                                                                                                                                                                                                                                                                                                                                                                                                                                                                                                                                                                                                                                                                                  |
|                    | RBM25   | <a href="#">18663000</a>                                                                                                                                                                                                                                                                                                                                                                                                                                                                                                                                                                                                                                                                                                                                                                                                                                                                                                                                                                                                                                                                                                                                                                                                                                                                                                                                                                                                                                                                                                                                                                                                                                                                                                                                                                                                                                                                                                                                                                                                                                                  |
|                    | RPL7    | <a href="#">9566973</a> , <a href="#">10672495</a> , <a href="#">10859237</a>                                                                                                                                                                                                                                                                                                                                                                                                                                                                                                                                                                                                                                                                                                                                                                                                                                                                                                                                                                                                                                                                                                                                                                                                                                                                                                                                                                                                                                                                                                                                                                                                                                                                                                                                                                                                                                                                                                                                                                                             |
|                    | RPS5    | <a href="#">10821535</a>                                                                                                                                                                                                                                                                                                                                                                                                                                                                                                                                                                                                                                                                                                                                                                                                                                                                                                                                                                                                                                                                                                                                                                                                                                                                                                                                                                                                                                                                                                                                                                                                                                                                                                                                                                                                                                                                                                                                                                                                                                                  |

Supplementary file 14

|                   |        |                                                                                                                                                                                                                                                                                                                                                                                                                                                                                                                                                                                                                                                                                                                                                                                                                                                                                                                                                                                                                                                                                                                                                                                                                                                                                                                                                                                                                                                                                                                                                                                                                                                                          |
|-------------------|--------|--------------------------------------------------------------------------------------------------------------------------------------------------------------------------------------------------------------------------------------------------------------------------------------------------------------------------------------------------------------------------------------------------------------------------------------------------------------------------------------------------------------------------------------------------------------------------------------------------------------------------------------------------------------------------------------------------------------------------------------------------------------------------------------------------------------------------------------------------------------------------------------------------------------------------------------------------------------------------------------------------------------------------------------------------------------------------------------------------------------------------------------------------------------------------------------------------------------------------------------------------------------------------------------------------------------------------------------------------------------------------------------------------------------------------------------------------------------------------------------------------------------------------------------------------------------------------------------------------------------------------------------------------------------------------|
|                   | SSB    | <a href="#">9794444</a> , <a href="#">12102760</a> , <a href="#">16906225</a>                                                                                                                                                                                                                                                                                                                                                                                                                                                                                                                                                                                                                                                                                                                                                                                                                                                                                                                                                                                                                                                                                                                                                                                                                                                                                                                                                                                                                                                                                                                                                                                            |
|                   | TACC1  | <a href="#">16288026</a>                                                                                                                                                                                                                                                                                                                                                                                                                                                                                                                                                                                                                                                                                                                                                                                                                                                                                                                                                                                                                                                                                                                                                                                                                                                                                                                                                                                                                                                                                                                                                                                                                                                 |
|                   | TIA1   | <a href="#">7964902</a> , <a href="#">8759725</a> , <a href="#">9486710</a> , <a href="#">9664088</a> , <a href="#">9973508</a> , <a href="#">10404082</a> , <a href="#">10613902</a> , <a href="#">10672058</a> , <a href="#">11514562</a> , <a href="#">12359741</a> , <a href="#">12533540</a> , <a href="#">14736875</a> , <a href="#">15316071</a> , <a href="#">15572676</a> , <a href="#">17869012</a> , <a href="#">18756326</a> , <a href="#">18959781</a>                                                                                                                                                                                                                                                                                                                                                                                                                                                                                                                                                                                                                                                                                                                                                                                                                                                                                                                                                                                                                                                                                                                                                                                                      |
|                   | TROVE2 | <a href="#">16301677</a> , <a href="#">16906225</a>                                                                                                                                                                                                                                                                                                                                                                                                                                                                                                                                                                                                                                                                                                                                                                                                                                                                                                                                                                                                                                                                                                                                                                                                                                                                                                                                                                                                                                                                                                                                                                                                                      |
| <b>Cell Cycle</b> | ADAR   | <a href="#">17224799</a>                                                                                                                                                                                                                                                                                                                                                                                                                                                                                                                                                                                                                                                                                                                                                                                                                                                                                                                                                                                                                                                                                                                                                                                                                                                                                                                                                                                                                                                                                                                                                                                                                                                 |
|                   | AKAP1  | <a href="#">10995432</a> , <a href="#">11994283</a> , <a href="#">12697839</a> , <a href="#">12925532</a> , <a href="#">15470020</a>                                                                                                                                                                                                                                                                                                                                                                                                                                                                                                                                                                                                                                                                                                                                                                                                                                                                                                                                                                                                                                                                                                                                                                                                                                                                                                                                                                                                                                                                                                                                     |
|                   | CSTF2  | <a href="#">9736695</a> , <a href="#">10859161</a> , <a href="#">11598190</a> , <a href="#">11943782</a> , <a href="#">12446762</a> , <a href="#">16371507</a>                                                                                                                                                                                                                                                                                                                                                                                                                                                                                                                                                                                                                                                                                                                                                                                                                                                                                                                                                                                                                                                                                                                                                                                                                                                                                                                                                                                                                                                                                                           |
|                   | CSTF3  | <a href="#">16882666</a>                                                                                                                                                                                                                                                                                                                                                                                                                                                                                                                                                                                                                                                                                                                                                                                                                                                                                                                                                                                                                                                                                                                                                                                                                                                                                                                                                                                                                                                                                                                                                                                                                                                 |
|                   | EIF3B  | <a href="#">8150258</a> , <a href="#">9362495</a> , <a href="#">11042177</a> , <a href="#">11134033</a>                                                                                                                                                                                                                                                                                                                                                                                                                                                                                                                                                                                                                                                                                                                                                                                                                                                                                                                                                                                                                                                                                                                                                                                                                                                                                                                                                                                                                                                                                                                                                                  |
|                   | FUS    | <a href="#">12040005</a>                                                                                                                                                                                                                                                                                                                                                                                                                                                                                                                                                                                                                                                                                                                                                                                                                                                                                                                                                                                                                                                                                                                                                                                                                                                                                                                                                                                                                                                                                                                                                                                                                                                 |
|                   | GARS   | <a href="#">16763051</a>                                                                                                                                                                                                                                                                                                                                                                                                                                                                                                                                                                                                                                                                                                                                                                                                                                                                                                                                                                                                                                                                                                                                                                                                                                                                                                                                                                                                                                                                                                                                                                                                                                                 |
|                   | MARS   | <a href="#">9843569</a> , <a href="#">15073333</a> , <a href="#">18761010</a>                                                                                                                                                                                                                                                                                                                                                                                                                                                                                                                                                                                                                                                                                                                                                                                                                                                                                                                                                                                                                                                                                                                                                                                                                                                                                                                                                                                                                                                                                                                                                                                            |
|                   | NONO   | <a href="#">2336466</a> , <a href="#">16148043</a>                                                                                                                                                                                                                                                                                                                                                                                                                                                                                                                                                                                                                                                                                                                                                                                                                                                                                                                                                                                                                                                                                                                                                                                                                                                                                                                                                                                                                                                                                                                                                                                                                       |
|                   | NPM1   | <a href="#">1874752</a> , <a href="#">2026181</a> , <a href="#">3308448</a> , <a href="#">6345184</a> , <a href="#">8526928</a> , <a href="#">8694782</a> , <a href="#">9181305</a> , <a href="#">9350304</a> , <a href="#">9914158</a> , <a href="#">10208875</a> , <a href="#">10233871</a> , <a href="#">10471330</a> , <a href="#">10503877</a> , <a href="#">10512052</a> , <a href="#">10931858</a> , <a href="#">11278991</a> , <a href="#">11812799</a> , <a href="#">11888936</a> , <a href="#">12058066</a> , <a href="#">12237316</a> , <a href="#">12464630</a> , <a href="#">12861014</a> , <a href="#">14583466</a> , <a href="#">14635188</a> , <a href="#">14636574</a> , <a href="#">14739278</a> , <a href="#">15082766</a> , <a href="#">15126367</a> , <a href="#">15184379</a> , <a href="#">15190079</a> , <a href="#">15265990</a> , <a href="#">15314174</a> , <a href="#">15388344</a> , <a href="#">15644315</a> , <a href="#">15665273</a> , <a href="#">15684379</a> , <a href="#">15699019</a> , <a href="#">15814843</a> , <a href="#">15872011</a> , <a href="#">16024624</a> , <a href="#">16140928</a> , <a href="#">16199867</a> , <a href="#">16501600</a> , <a href="#">16540521</a> , <a href="#">16540653</a> , <a href="#">16608843</a> , <a href="#">16648475</a> , <a href="#">16738315</a> , <a href="#">16818631</a> , <a href="#">16912078</a> , <a href="#">17069796</a> , <a href="#">17111047</a> , <a href="#">17113241</a> , <a href="#">17179202</a> , <a href="#">17215513</a> , <a href="#">18165222</a> , <a href="#">18729828</a> , <a href="#">18763323</a> , <a href="#">18931307</a> , <a href="#">18951898</a> |
|                   | PNPT1  | <a href="#">16055741</a> , <a href="#">16410805</a> , <a href="#">17804700</a>                                                                                                                                                                                                                                                                                                                                                                                                                                                                                                                                                                                                                                                                                                                                                                                                                                                                                                                                                                                                                                                                                                                                                                                                                                                                                                                                                                                                                                                                                                                                                                                           |
|                   | PSMA1  | <a href="#">9247291</a>                                                                                                                                                                                                                                                                                                                                                                                                                                                                                                                                                                                                                                                                                                                                                                                                                                                                                                                                                                                                                                                                                                                                                                                                                                                                                                                                                                                                                                                                                                                                                                                                                                                  |
|                   | PTBP1  | <a href="#">15685555</a>                                                                                                                                                                                                                                                                                                                                                                                                                                                                                                                                                                                                                                                                                                                                                                                                                                                                                                                                                                                                                                                                                                                                                                                                                                                                                                                                                                                                                                                                                                                                                                                                                                                 |

Supplementary file 14

|                           |         |                                                                                                                                                                                                                                                                                                                                                                                                                                                                                                                                                                                                                                                                                                                                                                                                                                                                                                                                                                                                                                                                                                                                                                                                                                                                                                                                                                                                                                                                                                                                                                                                                                                                                                                                                                                                                                                                                                                                                                                                                                              |
|---------------------------|---------|----------------------------------------------------------------------------------------------------------------------------------------------------------------------------------------------------------------------------------------------------------------------------------------------------------------------------------------------------------------------------------------------------------------------------------------------------------------------------------------------------------------------------------------------------------------------------------------------------------------------------------------------------------------------------------------------------------------------------------------------------------------------------------------------------------------------------------------------------------------------------------------------------------------------------------------------------------------------------------------------------------------------------------------------------------------------------------------------------------------------------------------------------------------------------------------------------------------------------------------------------------------------------------------------------------------------------------------------------------------------------------------------------------------------------------------------------------------------------------------------------------------------------------------------------------------------------------------------------------------------------------------------------------------------------------------------------------------------------------------------------------------------------------------------------------------------------------------------------------------------------------------------------------------------------------------------------------------------------------------------------------------------------------------------|
|                           | RBM14   | <a href="#">18829545</a>                                                                                                                                                                                                                                                                                                                                                                                                                                                                                                                                                                                                                                                                                                                                                                                                                                                                                                                                                                                                                                                                                                                                                                                                                                                                                                                                                                                                                                                                                                                                                                                                                                                                                                                                                                                                                                                                                                                                                                                                                     |
|                           | RPL7    | <a href="#">10672495</a> , <a href="#">10859237</a>                                                                                                                                                                                                                                                                                                                                                                                                                                                                                                                                                                                                                                                                                                                                                                                                                                                                                                                                                                                                                                                                                                                                                                                                                                                                                                                                                                                                                                                                                                                                                                                                                                                                                                                                                                                                                                                                                                                                                                                          |
|                           | RPS5    | <a href="#">18288641</a>                                                                                                                                                                                                                                                                                                                                                                                                                                                                                                                                                                                                                                                                                                                                                                                                                                                                                                                                                                                                                                                                                                                                                                                                                                                                                                                                                                                                                                                                                                                                                                                                                                                                                                                                                                                                                                                                                                                                                                                                                     |
|                           | SLBP    | <a href="#">10825184</a> , <a href="#">11157774</a> , <a href="#">11238936</a> , <a href="#">11884612</a> , <a href="#">12370293</a> , <a href="#">12415002</a> , <a href="#">12588979</a> , <a href="#">14999087</a> , <a href="#">15684398</a> , <a href="#">15829567</a> , <a href="#">15916543</a> , <a href="#">16055702</a> , <a href="#">16492733</a> , <a href="#">16714279</a> , <a href="#">16914750</a> , <a href="#">17442888</a>                                                                                                                                                                                                                                                                                                                                                                                                                                                                                                                                                                                                                                                                                                                                                                                                                                                                                                                                                                                                                                                                                                                                                                                                                                                                                                                                                                                                                                                                                                                                                                                                |
|                           | SSB     | <a href="#">1285896</a> , <a href="#">2579168</a>                                                                                                                                                                                                                                                                                                                                                                                                                                                                                                                                                                                                                                                                                                                                                                                                                                                                                                                                                                                                                                                                                                                                                                                                                                                                                                                                                                                                                                                                                                                                                                                                                                                                                                                                                                                                                                                                                                                                                                                            |
|                           | TACC1   | <a href="#">10637228</a> , <a href="#">17359303</a>                                                                                                                                                                                                                                                                                                                                                                                                                                                                                                                                                                                                                                                                                                                                                                                                                                                                                                                                                                                                                                                                                                                                                                                                                                                                                                                                                                                                                                                                                                                                                                                                                                                                                                                                                                                                                                                                                                                                                                                          |
| <b>Cell Proliferation</b> | ACO1    | <a href="#">11082186</a>                                                                                                                                                                                                                                                                                                                                                                                                                                                                                                                                                                                                                                                                                                                                                                                                                                                                                                                                                                                                                                                                                                                                                                                                                                                                                                                                                                                                                                                                                                                                                                                                                                                                                                                                                                                                                                                                                                                                                                                                                     |
|                           | ADAR    | <a href="#">11099415</a> , <a href="#">14615479</a>                                                                                                                                                                                                                                                                                                                                                                                                                                                                                                                                                                                                                                                                                                                                                                                                                                                                                                                                                                                                                                                                                                                                                                                                                                                                                                                                                                                                                                                                                                                                                                                                                                                                                                                                                                                                                                                                                                                                                                                          |
|                           | APOBEC1 | <a href="#">9633945</a>                                                                                                                                                                                                                                                                                                                                                                                                                                                                                                                                                                                                                                                                                                                                                                                                                                                                                                                                                                                                                                                                                                                                                                                                                                                                                                                                                                                                                                                                                                                                                                                                                                                                                                                                                                                                                                                                                                                                                                                                                      |
|                           | CPSF6   | <a href="#">18636107</a>                                                                                                                                                                                                                                                                                                                                                                                                                                                                                                                                                                                                                                                                                                                                                                                                                                                                                                                                                                                                                                                                                                                                                                                                                                                                                                                                                                                                                                                                                                                                                                                                                                                                                                                                                                                                                                                                                                                                                                                                                     |
|                           | CSTF2   | <a href="#">9736695</a>                                                                                                                                                                                                                                                                                                                                                                                                                                                                                                                                                                                                                                                                                                                                                                                                                                                                                                                                                                                                                                                                                                                                                                                                                                                                                                                                                                                                                                                                                                                                                                                                                                                                                                                                                                                                                                                                                                                                                                                                                      |
|                           | EIF3B   | <a href="#">3308493</a>                                                                                                                                                                                                                                                                                                                                                                                                                                                                                                                                                                                                                                                                                                                                                                                                                                                                                                                                                                                                                                                                                                                                                                                                                                                                                                                                                                                                                                                                                                                                                                                                                                                                                                                                                                                                                                                                                                                                                                                                                      |
|                           | NKRF    | <a href="#">16648473</a>                                                                                                                                                                                                                                                                                                                                                                                                                                                                                                                                                                                                                                                                                                                                                                                                                                                                                                                                                                                                                                                                                                                                                                                                                                                                                                                                                                                                                                                                                                                                                                                                                                                                                                                                                                                                                                                                                                                                                                                                                     |
|                           | NPM1    | <a href="#">1697568</a> , <a href="#">3392030</a> , <a href="#">7474921</a> , <a href="#">9819383</a> , <a href="#">10233871</a> , <a href="#">10878901</a> , <a href="#">11125022</a> , <a href="#">11280786</a> , <a href="#">11309377</a> , <a href="#">11494142</a> , <a href="#">11522649</a> , <a href="#">11756229</a> , <a href="#">11888936</a> , <a href="#">12057857</a> , <a href="#">12067985</a> , <a href="#">12086925</a> , <a href="#">12374805</a> , <a href="#">12623937</a> , <a href="#">12691918</a> , <a href="#">12748172</a> , <a href="#">12882984</a> , <a href="#">14635188</a> , <a href="#">14729947</a> , <a href="#">15082766</a> , <a href="#">15289458</a> , <a href="#">15485902</a> , <a href="#">15588951</a> , <a href="#">15616222</a> , <a href="#">15644315</a> , <a href="#">15665273</a> , <a href="#">15684379</a> , <a href="#">15805275</a> , <a href="#">15831697</a> , <a href="#">15872011</a> , <a href="#">16024624</a> , <a href="#">16045751</a> , <a href="#">16051734</a> , <a href="#">16135794</a> , <a href="#">16199867</a> , <a href="#">16254137</a> , <a href="#">16267006</a> , <a href="#">16317043</a> , <a href="#">16357222</a> , <a href="#">16469875</a> , <a href="#">16508011</a> , <a href="#">16540521</a> , <a href="#">16540653</a> , <a href="#">16648475</a> , <a href="#">16705183</a> , <a href="#">16709933</a> , <a href="#">16782897</a> , <a href="#">16785248</a> , <a href="#">16857742</a> , <a href="#">16870143</a> , <a href="#">16912078</a> , <a href="#">16982741</a> , <a href="#">17015463</a> , <a href="#">17069796</a> , <a href="#">17108330</a> , <a href="#">17113241</a> , <a href="#">17179202</a> , <a href="#">17277230</a> , <a href="#">17308101</a> , <a href="#">17612934</a> , <a href="#">17949752</a> , <a href="#">17998938</a> , <a href="#">18024471</a> , <a href="#">18070884</a> , <a href="#">18574026</a> , <a href="#">18809582</a> , <a href="#">18931307</a> , <a href="#">18951898</a> , <a href="#">19033198</a> |
|                           | PTBP1   | <a href="#">12509450</a>                                                                                                                                                                                                                                                                                                                                                                                                                                                                                                                                                                                                                                                                                                                                                                                                                                                                                                                                                                                                                                                                                                                                                                                                                                                                                                                                                                                                                                                                                                                                                                                                                                                                                                                                                                                                                                                                                                                                                                                                                     |
|                           | RBM14   | <a href="#">18635665</a>                                                                                                                                                                                                                                                                                                                                                                                                                                                                                                                                                                                                                                                                                                                                                                                                                                                                                                                                                                                                                                                                                                                                                                                                                                                                                                                                                                                                                                                                                                                                                                                                                                                                                                                                                                                                                                                                                                                                                                                                                     |



Supplementary file 14

|                      |                          |                                                                                                                                                                                                                                                                                                                                                                                                                                                                                                                                                                                                                                                                     |
|----------------------|--------------------------|---------------------------------------------------------------------------------------------------------------------------------------------------------------------------------------------------------------------------------------------------------------------------------------------------------------------------------------------------------------------------------------------------------------------------------------------------------------------------------------------------------------------------------------------------------------------------------------------------------------------------------------------------------------------|
|                      | RBMX                     | <a href="#">16707624</a>                                                                                                                                                                                                                                                                                                                                                                                                                                                                                                                                                                                                                                            |
|                      | SLBP                     | <a href="#">16914750</a>                                                                                                                                                                                                                                                                                                                                                                                                                                                                                                                                                                                                                                            |
|                      | SSB                      | <a href="#">1592421</a>                                                                                                                                                                                                                                                                                                                                                                                                                                                                                                                                                                                                                                             |
|                      | TACC1                    | <a href="#">15705873</a>                                                                                                                                                                                                                                                                                                                                                                                                                                                                                                                                                                                                                                            |
| Cell Differentiation | ACO1                     | <a href="#">8636154</a> , <a href="#">10978328</a> , <a href="#">11082186</a>                                                                                                                                                                                                                                                                                                                                                                                                                                                                                                                                                                                       |
|                      | ADAR                     | <a href="#">9202292</a> , <a href="#">11099415</a>                                                                                                                                                                                                                                                                                                                                                                                                                                                                                                                                                                                                                  |
|                      | APOBEC1                  | <a href="#">160100694</a>                                                                                                                                                                                                                                                                                                                                                                                                                                                                                                                                                                                                                                           |
|                      | CSTF2                    | <a href="#">10781073</a>                                                                                                                                                                                                                                                                                                                                                                                                                                                                                                                                                                                                                                            |
|                      | EIF3G                    | <a href="#">17990289</a>                                                                                                                                                                                                                                                                                                                                                                                                                                                                                                                                                                                                                                            |
|                      | FUS                      | <a href="#">10442642</a> , <a href="#">10828883</a>                                                                                                                                                                                                                                                                                                                                                                                                                                                                                                                                                                                                                 |
|                      | GARS                     | <a href="#">11226317</a> , <a href="#">16763051</a>                                                                                                                                                                                                                                                                                                                                                                                                                                                                                                                                                                                                                 |
|                      | KHSRP                    | <a href="#">14657238</a> , <a href="#">16364914</a> , <a href="#">16914741</a>                                                                                                                                                                                                                                                                                                                                                                                                                                                                                                                                                                                      |
|                      | NONO                     | <a href="#">9360842</a> , <a href="#">10364157</a> , <a href="#">10605820</a>                                                                                                                                                                                                                                                                                                                                                                                                                                                                                                                                                                                       |
|                      | NPM1                     | <a href="#">1568462</a> , <a href="#">9484783</a> , <a href="#">10233871</a> , <a href="#">11054668</a> , <a href="#">11125022</a> , <a href="#">11756229</a> , <a href="#">12374805</a> , <a href="#">12882984</a> , <a href="#">14520467</a> , <a href="#">14583466</a> , <a href="#">15310764</a> , <a href="#">15899793</a> , <a href="#">16109776</a> , <a href="#">16199867</a> , <a href="#">16365184</a> , <a href="#">16449640</a> , <a href="#">16455956</a> , <a href="#">16540685</a> , <a href="#">16608843</a> , <a href="#">16766651</a> , <a href="#">16857742</a> , <a href="#">17318229</a> , <a href="#">17448503</a> , <a href="#">17949752</a> |
|                      | PNPT1                    | <a href="#">15492272</a> , <a href="#">15978720</a> , <a href="#">16733069</a>                                                                                                                                                                                                                                                                                                                                                                                                                                                                                                                                                                                      |
|                      | PTBP1                    | <a href="#">11724819</a>                                                                                                                                                                                                                                                                                                                                                                                                                                                                                                                                                                                                                                            |
|                      | RBM14                    | <a href="#">17337438</a>                                                                                                                                                                                                                                                                                                                                                                                                                                                                                                                                                                                                                                            |
|                      | RPS5                     | <a href="#">10821535</a> , <a href="#">11684664</a> , <a href="#">18288641</a>                                                                                                                                                                                                                                                                                                                                                                                                                                                                                                                                                                                      |
| SNRPA                | <a href="#">15226420</a> |                                                                                                                                                                                                                                                                                                                                                                                                                                                                                                                                                                                                                                                                     |
| Cell Survival        | ACO1                     | <a href="#">15178542</a>                                                                                                                                                                                                                                                                                                                                                                                                                                                                                                                                                                                                                                            |
|                      | ADAR                     | <a href="#">14613934</a> , <a href="#">14615479</a>                                                                                                                                                                                                                                                                                                                                                                                                                                                                                                                                                                                                                 |
|                      | AKAP1                    | <a href="#">12427737</a> , <a href="#">12716901</a> , <a href="#">16251349</a> , <a href="#">18323779</a>                                                                                                                                                                                                                                                                                                                                                                                                                                                                                                                                                           |

Supplementary file 14

|                    |        |                                                                                                                                                                                                                                                                                                                                                                                                                                                                                                                                                                                                                                                                                                                             |
|--------------------|--------|-----------------------------------------------------------------------------------------------------------------------------------------------------------------------------------------------------------------------------------------------------------------------------------------------------------------------------------------------------------------------------------------------------------------------------------------------------------------------------------------------------------------------------------------------------------------------------------------------------------------------------------------------------------------------------------------------------------------------------|
|                    | NONO   | <a href="#">18219107</a>                                                                                                                                                                                                                                                                                                                                                                                                                                                                                                                                                                                                                                                                                                    |
|                    | NPM1   | <a href="#">10552961</a> , <a href="#">12882984</a> , <a href="#">14962911</a> , <a href="#">15226403</a> , <a href="#">15310764</a> , <a href="#">15374880</a> , <a href="#">15680399</a> , <a href="#">15684379</a> , <a href="#">15831697</a> , <a href="#">15883821</a> , <a href="#">15994285</a> , <a href="#">16046528</a> , <a href="#">16105984</a> , <a href="#">16109776</a> , <a href="#">16199867</a> , <a href="#">16317043</a> , <a href="#">16608843</a> , <a href="#">16763206</a> , <a href="#">16785248</a> , <a href="#">16982741</a> , <a href="#">17015463</a> , <a href="#">17111047</a> , <a href="#">18070884</a> , <a href="#">18342811</a> , <a href="#">18574026</a> , <a href="#">18931307</a> |
|                    | TACC1  | <a href="#">16288026</a>                                                                                                                                                                                                                                                                                                                                                                                                                                                                                                                                                                                                                                                                                                    |
|                    | TIA1   | <a href="#">12533540</a> , <a href="#">14769925</a> , <a href="#">15572676</a> , <a href="#">16236613</a>                                                                                                                                                                                                                                                                                                                                                                                                                                                                                                                                                                                                                   |
|                    | TROVE2 | <a href="#">16890888</a> , <a href="#">16906225</a>                                                                                                                                                                                                                                                                                                                                                                                                                                                                                                                                                                                                                                                                         |
| <b>Cell Growth</b> | ADAR   | <a href="#">17156436</a>                                                                                                                                                                                                                                                                                                                                                                                                                                                                                                                                                                                                                                                                                                    |
|                    | CSTF2  | <a href="#">9710585</a> , <a href="#">9885564</a> , <a href="#">10669729</a>                                                                                                                                                                                                                                                                                                                                                                                                                                                                                                                                                                                                                                                |
|                    | FXR1   | <a href="#">17382873</a>                                                                                                                                                                                                                                                                                                                                                                                                                                                                                                                                                                                                                                                                                                    |
|                    | NCBP2  | <a href="#">10733586</a>                                                                                                                                                                                                                                                                                                                                                                                                                                                                                                                                                                                                                                                                                                    |
|                    | NOL8   | <a href="#">14660641</a>                                                                                                                                                                                                                                                                                                                                                                                                                                                                                                                                                                                                                                                                                                    |
|                    | NPM1   | <a href="#">1381705</a> , <a href="#">1399149</a> , <a href="#">1697505</a> , <a href="#">1917161</a> , <a href="#">8601891</a> , <a href="#">10233871</a> , <a href="#">10503877</a> , <a href="#">10779644</a> , <a href="#">11756229</a> , <a href="#">12086925</a> , <a href="#">12374805</a> , <a href="#">15665273</a> , <a href="#">15684379</a> , <a href="#">15805275</a> , <a href="#">15872011</a> , <a href="#">16317043</a> , <a href="#">16648475</a> , <a href="#">16857742</a> , <a href="#">16982741</a> , <a href="#">17245342</a> , <a href="#">17318229</a> , <a href="#">17483340</a> , <a href="#">18024471</a> , <a href="#">18809582</a>                                                            |
|                    | PNPT1  | <a href="#">15734991</a> , <a href="#">17804700</a>                                                                                                                                                                                                                                                                                                                                                                                                                                                                                                                                                                                                                                                                         |
|                    | RBM8A  | <a href="#">17545126</a>                                                                                                                                                                                                                                                                                                                                                                                                                                                                                                                                                                                                                                                                                                    |
|                    | RPL18  | <a href="#">9891046</a>                                                                                                                                                                                                                                                                                                                                                                                                                                                                                                                                                                                                                                                                                                     |
|                    | STRBP  | <a href="#">11438536</a>                                                                                                                                                                                                                                                                                                                                                                                                                                                                                                                                                                                                                                                                                                    |
